# Supplementary material for: Atroposelective synthesis of axially chiral indolizinylpyrroles by catalytic asymmetric Paal–Knorr reaction
Source: Royal Society of Chemistry journal article supplement (doi:10.1039/d4cc04678a), 2024-01-01
Supplement: d4cc04678a1.pdf [file d4cc04678a1.pdf]

# Atroposelective Synthesis of Axially Chiral Indolizine-pyrroles by Catalytic Asymmetric Paal-Knorr Reaction

Wenyan Zhan,<sup>a</sup> Jiameng Hu,<sup>b</sup> Xiaoyun Chen,<sup>c</sup> Gen Luo,<sup>b,\*</sup> Xiaoxiao Song<sup>a,\*</sup>

<sup>a</sup> Key Laboratory of Functionalized Molecular Solids, Ministry of Education, Anhui Key Laboratory of Molecule-Based Materials (State Key Laboratory Cultivation Base), College of Chemistry and Materials Science, Anhui Normal University, Wuhu 241002, Anhui, P. R. China

<sup>b</sup> Institutes of Physical Science and Information Technology, Anhui University, Hefei 230601, China

<sup>c</sup> School of Environmental and Chemical Engineering, Jiangsu University of Science and Technology, Zhenjiang, 212003, P. R. China

## Content

|                                                                                   |     |
|-----------------------------------------------------------------------------------|-----|
| 1. General information .....                                                      | 2   |
| 2. General procedure for synthesis of 3-aminoindolizine .....                     | 2   |
| 3. General procedure for the preparation of 1,4-diketones .....                   | 2   |
| 4. General procedure for the asymmetric synthesis of axially chiral product ..... | 3   |
| 5. Large-scale synthesis of the product <b>3ah</b> .....                          | 3   |
| 6. Procedure for the late-stage functionalizations of <b>3ah</b> .....            | 4   |
| 7. Racemization experiments .....                                                 | 4   |
| 8. Analytical data .....                                                          | 6   |
| 9. X-ray crystallographic analysis .....                                          | 19  |
| 10. Theoretical calculation on the rotational barriers of products .....          | 20  |
| 11. Proposed reaction pathway .....                                               | 31  |
| 12. Copies of NMR spectra and HPLC measurements of the products .....             | 32  |
| 13. Reference .....                                                               | 110 |

## 1. General information

The products were purified by column chromatography on silica gel (300-400 mesh). For thin-layer chromatography (TLC) analysis, silica gel plates (HSGF254) were used. Visualization of the developed TLC plates was performed with ultraviolet irradiation (254 nm) or staining potassium permanganate solution followed by heating using a heat gun. High resolution mass spectra on a Bruker Apex IV RTMS spectrometer.  $^1\text{H}$  and  $^{13}\text{C}$  NMR spectra were recorded on Bruker AVANCE-400 (400 MHz) /AVANCE-500(500 MHz) spectrometer. Chemical shifts were reported in parts per million (ppm), and the residual solvent peak was used as an internal reference: proton (chloroform  $\delta$  7.26), carbon (chloroform  $\delta$  77.0) or tetramethylsilane (TMS  $\delta$  0.00) was used as a reference. Multiplicity was indicated as follows: s (singlet), d (doublet), t (triplet), q (quartet), m (multiplet), dd (doublet of doublet), bs (broad singlet). Coupling constants were reported in Hertz (Hz). Melting points were determined on a SGW X-4 melting apparatus. Analytical HPLC was performed on a Agilent 1200 Series instrument using Daicel Chiralcel® columns as noted. Optical rotation values were measured on a Schmidt Haensch polarimeter. 1,4-Diketones and 3-aminoindolizines were prepared according to the literature procedure.<sup>1-2</sup> The CPA catalysts were purchased from Daicel Chiral technologies(China)CO.,LTD or Bide Pharmatech LTD, which were directly used without additional process. The racemic products were prepared by running reactions with a racemic catalyst.

## 2. General procedure for synthesis of 3-aminoindolizine

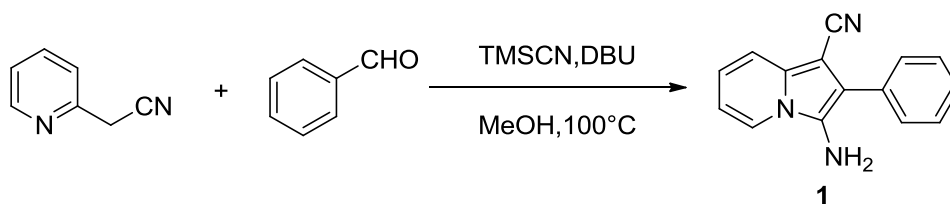

To a mixture of benzaldehyde (313.1  $\mu\text{L}$ , 2.70 mmol, 1.0 equiv) and pyridine-2-acetonitrile (451.8  $\mu\text{L}$ , 4.05 mmol, 1.5 equiv) in MeOH (10 mL) were added TMSCN (506.7  $\mu\text{L}$ , 4.05 mmol, 1.5 equiv) and DBU (80.6  $\mu\text{L}$ , 0.54 mmol, 0.2 equiv) at rt. After being stirred at 100 °C for 24 h (heating mantle was used), the reaction mixture was cooled down to room temperature and filtered. The filtrate was further purified by silica gel column chromatography (petroleum ether/EtOAc 9:1) to give **1** as a green solid (724.9 mg, 86% yield).

## 3. General procedure for the preparation of 1,4-diketones

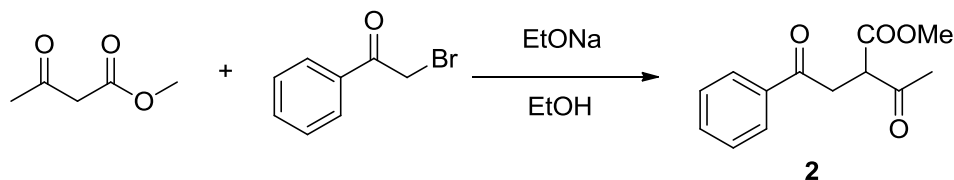

Methyl acetoacetate (1.56 g, 12 mmol) was added dropwise to a stirred suspension of sodium ethoxide (0.68g, 10 mmol) in 15 mL of anhydrous ethanol at room temperature. After 10 min, a solution of 2-bromo-1-phenylpropan-1-one (1.99 g, 10 mmol) in 26 mL of anhydrous ethanol was added dropwise to the reaction mixture. Upon completion of the reaction, which was monitored by TLC, the reaction mixture was quenched with water (20 mL), and extracted with EtOAc (30 mL x

3). The combined organic phases were washed with saturated aqueous ammonium chloride (20 mL), and dried over anhydrous sodium sulfate. The concentrated residue purified by silica gel column chromatography (petroleum ether/EtOAc 15:1) to give compound **2** (2.62 g, 88% yield) as light yellow oil.

#### 4. General procedure for the asymmetric synthesis of axially chiral product

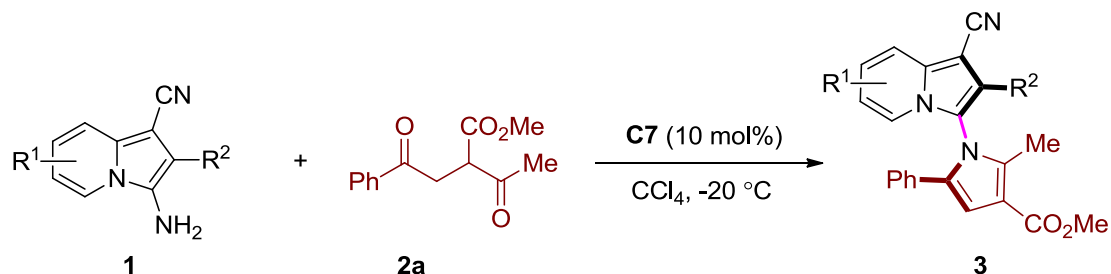

General procedure A: To a 4 mL vial was added 3-aminoindolizine **1** (0.12 mmol, 1.2 equiv), 1,4-diketone **2a** (0.10 mmol, 1.0 equiv) and **C7** (0.01 mmol, 10 mol%) in  $\text{CCl}_4$  (1.0 mL). The mixture was stirred at  $-20\text{ }^\circ\text{C}$  and monitored by TLC until completion of the reaction. The solvent was removed by rotovapor and the residue was directly purified by flash chromatography on silica gel (petroleum ether/ethyl acetate 15:1) to afford the product **3**.

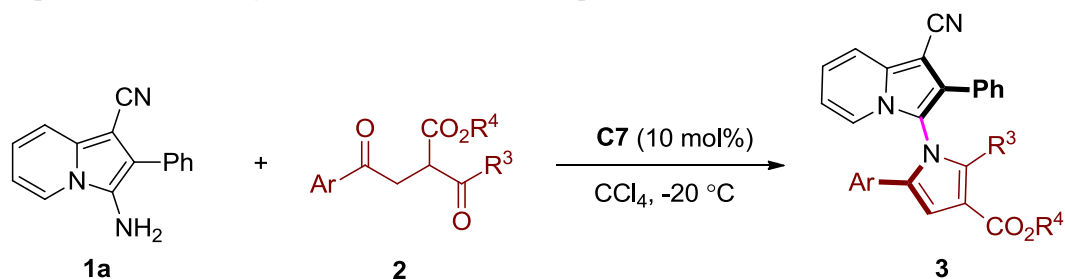

General procedure B: To a 4 mL vial was added 3-aminoindolizine **1a** (0.10 mmol, 1.0 equiv), 1,4-diketone **2** (0.30 mmol, 3.0 equiv) and **C7** (0.01 mmol, 10 mol%) in  $\text{CCl}_4$  (1.0 mL). The mixture was stirred at  $-20\text{ }^\circ\text{C}$  and monitored by TLC until completion of the reaction. The solvent was removed by rotovapor and the residue was directly purified by flash chromatography on silica gel (petroleum ether/ethyl acetate 15:1) to afford the product **3**.

#### 5. Large-scale synthesis of the product **3ah**

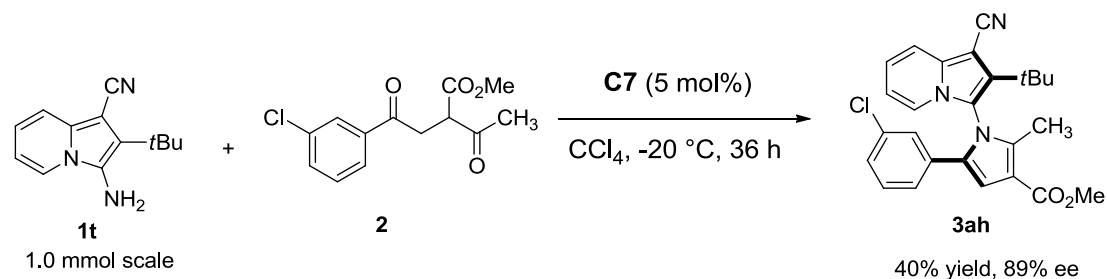

To a 25 mL round-bottom flask was added 1,4-diketone **2** (3 mmol, 806 mg, 3.0 equiv) and **C7** (0.05 mmol, 5 mol%) in 10 mL  $\text{CCl}_4$  with stirring in air at  $-20\text{ }^\circ\text{C}$  for 10 min, then 3-aminoindolizine **1t** (1.0 mmol, 213 mg, 1.0 equiv) was added and the mixture was stirred at  $-20\text{ }^\circ\text{C}$  for 36 h. The solvent was removed by rotovapor and the residue was directly purified by flash column chromatography on silica gel (petroleum ether/ethyl acetate 15:1) to afford the

product **3ah** in 40% yield (180.1 mg) as a white solid.

## 6. Procedure for the late-stage functionalizations of **3ah**

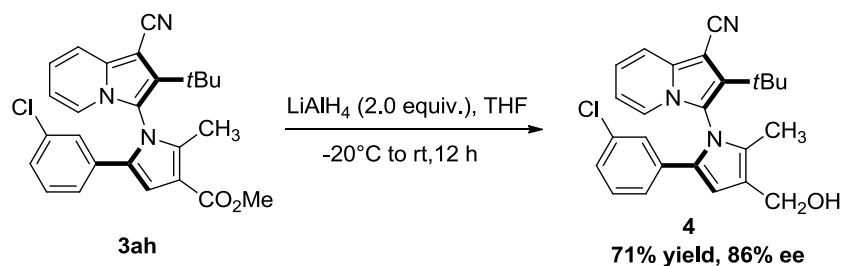

To a solution of the **3ah**, LiAlH<sub>4</sub> (2.0 equiv.) in THF (1.0 mL) was added portion wise at -20 °C. The mixture was stirred at room temperature for 12 h. The reaction was quenched with water. The combined organic phases were washed with ethyl acetoacetate and dried over sodium sulfate. Purification of the residue by column chromatography (petroleum ether/EtOAc 15:1) to provide product **4** as a light yellow solid (15.0 mg, 71% yield).

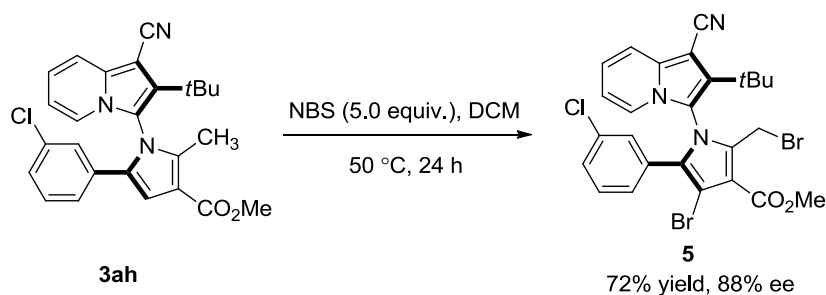

To a solution of the **3ah**, NBS (5.0 equiv.) in CH<sub>2</sub>Cl<sub>2</sub> (1.0 mL) was added portionwise at 50 °C. The mixture was stirred for 24 h. The reaction was quenched with saturated Na<sub>2</sub>S<sub>2</sub>O<sub>3</sub> solution. The combined organic phases were washed with brine and CH<sub>2</sub>Cl<sub>2</sub> and dried over sodium sulfate. Purification of the residue by column chromatography (petroleum ether/EtOAc 15:1) to provide product **5** as a light yellow solid (21.1 mg, 72% yield).

## 7. Racemization experiments

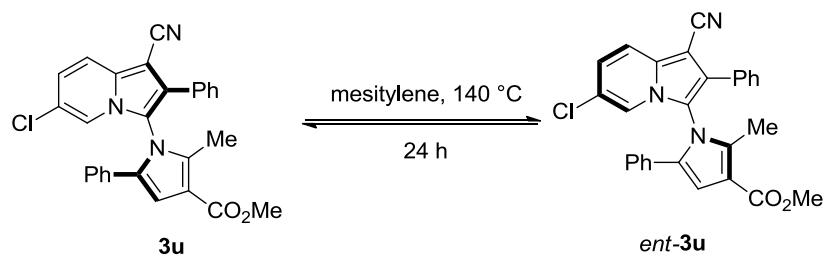

To a 10 mL vial charged with **3u** (0.010 mmol) was added mesitylene (1.0 mL). The reaction solution was stirred at 140 °C. The ee value of **3u** was determined by HPLC at indicated time points.

| Time(h) | ee (%) |
|---------|--------|
| 0       | 95     |
| 1       | 95     |
| 2       | 95     |



|    |    |
|----|----|
| 4  | 95 |
| 8  | 95 |
| 16 | 95 |
| 24 | 95 |

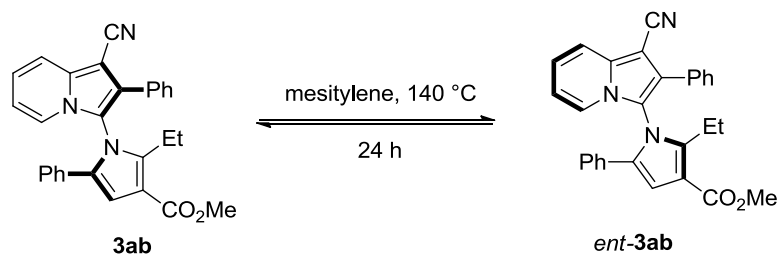

To a 10 mL vial charged with **3ab** (0.010 mmol) was added mesitylene (1.0 mL). The reaction solution was stirred at 140 °C. The ee value of **3ab** was determined by HPLC at indicated time points.

| Time(h) | ee (%) |
|---------|--------|
| 0       | 91     |
| 1       | 91     |
| 2       | 91     |
| 4       | 91     |
| 8       | 91     |
| 16      | 91     |
| 24      | 91     |

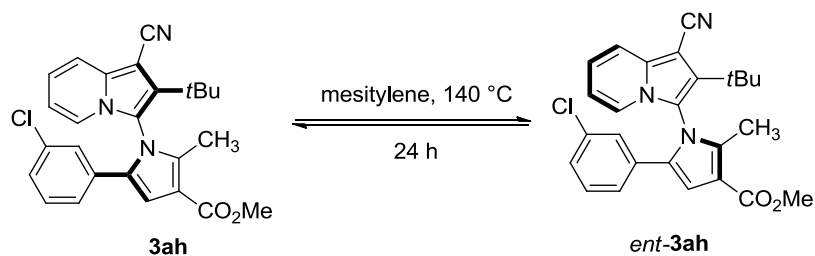

To a 10 mL vial charged with **3ah** (0.010 mmol) was added mesitylene (1.0 mL). The reaction solution was stirred at 140 °C. The ee value of **3ah** was determined by HPLC at indicated time points.

| Time(h) | ee (%) |
|---------|--------|
| 0       | 89     |
| 1       | 89     |
| 2       | 89     |
| 4       | 89     |
| 8       | 89     |
| 16      | 89     |
| 24      | 89     |

## 8. Analytical data

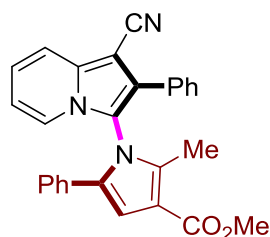

The compound **3a** was prepared according to the general procedure A. The product was obtained as a white solid (21.8 mg, 51% yield.). Melting point: 180-182 °C. The ee (95%) was measured by HPLC using a chiral stationary phase [Daicel IE, *n*-hexane:*i*-PrOH = 70:30, 1.0 mL/min),  $t_R$  = 9.070 min (major),  $t_R$  = 8.320 min (minor)],  $[\alpha]_D^{30}$  = +89.0 ( $c$  = 0.2, CHCl<sub>3</sub>).

**<sup>1</sup>H NMR** (400 MHz, CDCl<sub>3</sub>)  $\delta$  7.76 – 7.67 (m, 1H), 7.43 (d,  $J$  = 7.0 Hz, 1H), 7.35 – 7.27 (m, 5H), 7.20 – 7.14 (m, 1H), 7.06 (ddd,  $J$  = 14.6, 8.0, 6.4 Hz, 3H), 6.92 (s, 1H), 6.85 – 6.76 (m, 3H), 3.87 (s, 3H), 2.20 (s, 3H).

**<sup>13</sup>C NMR** (100 MHz, CDCl<sub>3</sub>)  $\delta$  165.5, 139.3, 136.3, 134.8, 131.0, 130.1, 129.2, 128.7, 128.6, 128.4, 127.9, 127.7, 126.4, 124.0, 121.8, 118.0, 116.4, 115.3, 114.8, 114.6, 111.1, 80.5, 51.4, 11.6.

**HRMS (ESI-TOF)**  $m/z$  :  $[M+H]^+$  Calcd for C<sub>28</sub>H<sub>22</sub>N<sub>3</sub>O<sub>2</sub><sup>+</sup> 431.1634; Found: 431.1635.

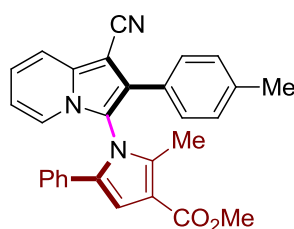

The compound **3b** was prepared according to the general procedure A. The product was obtained as a white solid (22.7 mg, 51% yield.). Melting point: 190-192 °C. The ee (91%) was measured by HPLC using a chiral stationary phase [Daicel IE, *n*-hexane:*i*-PrOH = 70:30, 1.0 mL/min),  $t_R$  = 8.268 min (major),  $t_R$  = 7.537 min (minor)],  $[\alpha]_D^{30}$  = +93.0 ( $c$  = 0.2, CHCl<sub>3</sub>).

**<sup>1</sup>H NMR** (400 MHz, CDCl<sub>3</sub>)  $\delta$  7.71 (d,  $J$  = 9.0 Hz, 1H), 7.39 (d,  $J$  = 7.0 Hz, 1H), 7.22 (d,  $J$  = 8.2 Hz, 2H), 7.14 (d,  $J$  = 8.2 Hz, 3H), 7.10 – 7.01 (m, 3H), 6.93 (s, 1H), 6.90 – 6.85 (m, 2H), 6.75 (td,  $J$  = 6.9, 1.2 Hz, 1H), 3.87 (s, 3H), 2.33 (s, 3H), 2.17 (s, 3H).

**<sup>13</sup>C NMR** (100 MHz, CDCl<sub>3</sub>)  $\delta$  165.5, 139.5, 138.7, 136.3, 134.7, 131.1, 130.0, 128.6, 128.5, 127.7, 127.6, 127.2, 126.4, 123.9, 121.7, 117.9, 116.5, 115.0, 114.7, 114.4, 111.0, 80.5, 51.3, 21.4, 11.5.

**HRMS (ESI-TOF)**  $m/z$  :  $[M+H]^+$  Calcd for C<sub>29</sub>H<sub>24</sub>N<sub>3</sub>O<sub>2</sub><sup>+</sup> 446.1863; Found: 446.1862.

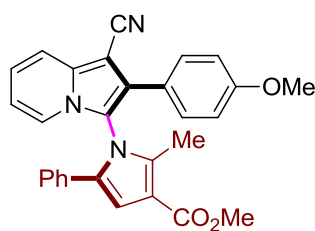

The compound **3c** was prepared according to the general procedure A with 5 mol% **C7**. The product was obtained as a white solid (33.2 mg, 72% yield). Melting point: 212-215 °C. The ee (93%) was measured by HPLC using a chiral stationary phase [Daicel ID, *n*-hexane:*i*-PrOH = 80:20, 1.0 mL/min),  $t_R$  = 13.450 min (major),  $t_R$  = 15.605 min (minor)],  $[\alpha]_D^{30}$  = -52.6 ( $c$  = 0.2, CHCl<sub>3</sub>).

**<sup>1</sup>H NMR** (400 MHz, CDCl<sub>3</sub>)  $\delta$  7.70 (d,  $J$  = 8.9 Hz, 1H), 7.39 (d,  $J$  = 6.9 Hz, 1H), 7.25 (d,  $J$  = 8.8 Hz, 2H), 7.14 (ddd,  $J$  = 9.0, 6.8, 1.0 Hz, 1H), 7.10 – 7.01 (m, 1H), 6.93 (s, 1H), 6.88 – 6.82 (m, 4H), 6.75 (td,  $J$  = 6.9, 1.2 Hz, 1H), 3.87 (s, 3H), 3.80 (s, 3H), 2.18 (s, 3H).

**<sup>13</sup>C NMR** (100 MHz, CDCl<sub>3</sub>)  $\delta$  165.5, 159.9, 139.4, 136.3, 134.7, 131.1, 129.2, 128.6, 128.3, 127.7, 126.4, 123.8, 122.5, 121.7, 117.8, 116.7, 114.8, 114.7, 114.7, 114.4, 111.1, 80.3, 55.4, 51.4, 11.5.

**HRMS (ESI-TOF)**  $m/z$  :  $[M+H]^+$  Calcd for C<sub>29</sub>H<sub>24</sub>N<sub>3</sub>O<sub>3</sub><sup>+</sup> 462.1812; Found: 462.1811.

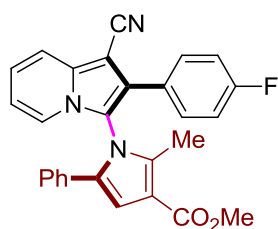

The compound **3d** was prepared according to the general procedure A with 5 mol% **C7**. The product was obtained as a light brown solid (22.4 mg, 50% yield). Melting point: 172-175 °C. The ee (92%) was measured by HPLC using a chiral stationary phase [Daicel IE, *n*-hexane:*i*-PrOH = 80:20, 1.0 mL/min),  $t_R = 10.038$  min (minor),  $t_R = 11.208$  min (major)],  $[\alpha]_D^{30} = -83.8$  ( $c = 0.2$ , CHCl<sub>3</sub>).

**<sup>1</sup>H NMR** (400 MHz, CDCl<sub>3</sub>)  $\delta$  7.74 (d,  $J = 9.0$  Hz, 1H), 7.48 (d,  $J = 7.0$  Hz, 1H), 7.23 – 7.16 (m, 3H), 7.13 – 7.08 (m, 1H), 7.07 – 6.97 (m, 4H), 6.90 (s, 1H), 6.83 (td,  $J = 6.9, 1.2$  Hz, 1H), 6.78 – 6.74 (m, 2H), 3.87 (s, 3H), 2.22 (s, 3H).

**<sup>13</sup>C NMR** (100 MHz, CDCl<sub>3</sub>)  $\delta$  165.4, 139.2, 136.2, 134.9, 131.0, 129.8, 129.7, 128.6, 127.7, 127.6, 126.4, 124.2, 121.8, 118.1, 116.4, 116.2, 115.3, 115.0, 114.7, 111.1, 80.6, 51.4, 11.6.

**<sup>19</sup>F NMR** (376 MHz, CDCl<sub>3</sub>)  $\delta$  -112.18.

**HRMS (ESI-TOF)**  $m/z$  :  $[M+H]^+$  Calcd for C<sub>28</sub>H<sub>21</sub>FN<sub>3</sub>O<sub>2</sub><sup>+</sup> 450.1612; Found: 450.1611.

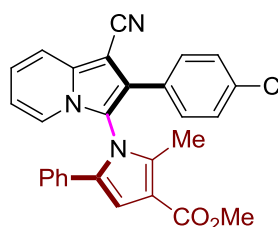

The compound **3e** was prepared according to the general procedure A with 5 mol% **C7**. The product was obtained as a white solid (25.6 mg, 55% yield). Melting point: 165-166 °C. The ee (92%) was measured by HPLC using a chiral stationary phase [Daicel IE, *n*-hexane:*i*-PrOH = 70:30, 1.0 mL/min),  $t_R = 7.251$  min (minor),  $t_R = 8.106$  min (major)],  $[\alpha]_D^{30} = +62.3$  ( $c = 0.1$ , CHCl<sub>3</sub>).

**<sup>1</sup>H NMR** (400 MHz, CDCl<sub>3</sub>)  $\delta$  7.76 – 7.68 (m, 1H), 7.48 (d,  $J = 6.9$  Hz, 1H), 7.28 (d,  $J = 8.6$  Hz, 2H), 7.20 (ddd,  $J = 9.0, 6.7, 1.1$  Hz, 1H), 7.15 (d,  $J = 8.6$  Hz, 1H), 7.10 (d,  $J = 7.1$  Hz, 1H), 7.05 (dd,  $J = 8.3, 6.4$  Hz, 2H), 6.91 (s, 1H), 6.83 (td,  $J = 6.9, 1.2$  Hz, 1H), 6.80 – 6.74 (m, 1H), 3.88 (s, 3H), 2.21 (s, 3H).

**<sup>13</sup>C NMR** (100 MHz, CDCl<sub>3</sub>)  $\delta$  165.4, 139.1, 136.3, 131.0, 129.5, 129.1, 128.8, 128.7, 128.6, 128.3, 127.8, 127.3, 126.4, 124.3, 121.9, 118.1, 115.4, 115.0, 114.8, 111.2, 80.6, 51.4, 11.6.

**HRMS (ESI-TOF)**  $m/z$  :  $[M+H]^+$  Calcd for C<sub>28</sub>H<sub>21</sub>ClN<sub>3</sub>O<sub>2</sub><sup>+</sup> 466.1317; Found: 466.1324.

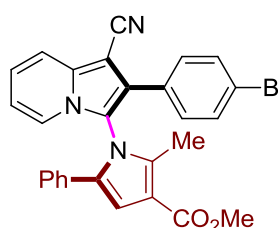

The compound **3f** was prepared according to the general procedure A. The product was obtained as a white solid (36.0 mg, 71% yield). Melting point: 178-181 °C. The ee (92%) was measured by HPLC using a chiral stationary phase [Daicel IE, *n*-hexane:*i*-PrOH = 70:30, 1.0 mL/min),  $t_R = 7.942$  min (minor),  $t_R = 8.808$  min (major)],  $[\alpha]_D^{30} = -70.2$  ( $c = 0.2$ , CHCl<sub>3</sub>).

**<sup>1</sup>H NMR** (400 MHz, CDCl<sub>3</sub>)  $\delta$  7.79 – 7.70 (m, 1H), 7.48 (dd,  $J = 6.9, 1.2$  Hz, 1H), 7.44 (d,  $J = 8.5$  Hz, 2H), 7.20 (ddd,  $J = 9.0, 6.7, 1.0$  Hz, 1H), 7.09 (q,  $J = 2.5, 1.6$  Hz, 2H), 7.07 (d,  $J = 3.4$  Hz, 2H), 7.04 (d,  $J = 6.9$  Hz, 1H), 6.91 (s, 1H), 6.83 (td,  $J = 6.8, 1.2$  Hz, 1H), 6.77 (d,  $J = 7.0$  Hz, 2H), 3.87 (s, 3H), 2.21 (s, 3H).

**<sup>13</sup>C NMR** (100 MHz, CDCl<sub>3</sub>)  $\delta$  165.4, 139.1, 136.3, 134.8, 132.4, 130.9, 129.3, 129.1, 128.7, 127.8, 127.3, 126.4, 124.3, 123.1, 121.9, 118.1, 116.1, 115.4, 115.0, 114.8, 111.2, 80.5, 51.4, 11.6.

**HRMS (ESI-TOF)**  $m/z$  :  $[M+H]^+$  Calcd for C<sub>28</sub>H<sub>21</sub>BrN<sub>3</sub>O<sub>2</sub><sup>+</sup> 510.0812; Found: 510.0816.

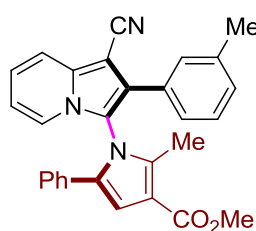

The compound **3g** was prepared according to the general procedure A. The product was obtained as a white solid (33.4 mg, 75% yield). Melting point: 159-161 °C. The ee (85%) was measured by HPLC using a chiral stationary phase [Daicel ID, *n*-hexane:*i*-PrOH = 90:10, 1.0 mL/min),  $t_R$  = 14.007 min (major),  $t_R$  = 15.782 min (minor)],  $[\alpha]_D^{30} = +46.2$  ( $c = 0.4$ , CHCl<sub>3</sub>).

<sup>1</sup>H NMR (400 MHz, CDCl<sub>3</sub>)  $\delta$  7.73 (dd,  $J = 9.0, 1.1$  Hz, 1H), 7.43 (dd,  $J = 7.0, 1.0$  Hz, 1H), 7.22 – 7.18 (m, 1H), 7.18 – 7.14 (m, 1H), 7.12 (d,  $J = 1.6$  Hz, 1H), 7.10 (s, 1H), 7.09 – 7.06 (m, 3H), 7.04 (d,  $J = 8.7$  Hz, 3H), 6.91 (s, 1H), 3.86 (s, 3H), 2.28 (s, 3H), 2.18 (s, 3H).  
<sup>13</sup>C NMR (100 MHz, CDCl<sub>3</sub>)  $\delta$  165.6, 139.4, 138.8, 136.3, 134.9, 131.1, 130.0, 129.5, 129.0, 128.7, 128.6, 128.6, 127.6, 126.5, 124.9, 123.9, 121.8, 118.0, 116.4, 115.2, 114.7, 114.5, 111.0, 80.7, 51.3, 21.6, 11.6.

HRMS (ESI-TOF)  $m/z$  : [M+H]<sup>+</sup> Calcd for C<sub>29</sub>H<sub>24</sub>N<sub>3</sub>O<sub>2</sub><sup>+</sup> 446.1863; Found: 446.1861.

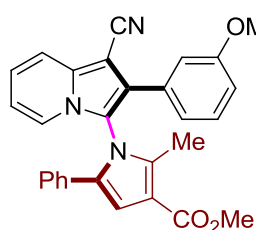

The compound **3h** was prepared according to the general procedure A. The product was obtained as a light pink solid (36.4 mg, 79% yield). Melting point: 163-165 °C. The ee (92%) was measured by HPLC using a chiral stationary phase [Daicel IE, *n*-hexane:*i*-PrOH = 70:30, 1.0 mL/min),  $t_R$  = 9.297 min (minor),  $t_R$  = 10.117 min (major)],  $[\alpha]_D^{30} = 30.0$  ( $c = 0.2$ , CHCl<sub>3</sub>).

<sup>1</sup>H NMR (400 MHz, CDCl<sub>3</sub>)  $\delta$  7.72 (d,  $J = 9.0$  Hz, 1H), 7.43 (d,  $J = 6.9$  Hz, 1H), 7.23 (t,  $J = 8.0$  Hz, 1H), 7.16 (ddd,  $J = 9.0, 6.8, 1.1$  Hz, 1H), 7.12 – 7.00 (m, 3H), 6.95 – 6.90 (m, 2H), 6.87 – 6.82 (m, 3H), 6.81 – 6.74 (m, 2H), 3.86 (s, 3H), 3.67 (s, 3H), 2.19 (s, 3H).  
<sup>13</sup>C NMR (100 MHz, CDCl<sub>3</sub>)  $\delta$  165.4, 159.9, 139.4, 136.3, 134.7, 131.3, 131.0, 130.2, 128.8, 128.6, 128.2, 127.7, 126.4, 124.0, 121.8, 120.2, 118.0, 115.4, 115.2, 114.8, 114.6, 112.3, 111.1, 80.6, 55.2, 51.3, 11.5.

HRMS (ESI-TOF)  $m/z$  : [M+H]<sup>+</sup> Calcd for C<sub>29</sub>H<sub>24</sub>N<sub>3</sub>O<sub>3</sub><sup>+</sup> 462.1812; Found: 462.1807.

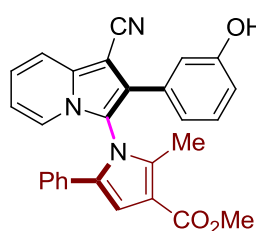

The compound **3i** was prepared according to the general procedure A. The product was obtained as a white solid (23.4 mg, 51% yield). Melting point: 187-193 °C. The ee (84%) was measured by HPLC using a chiral stationary phase [Daicel IE, *n*-hexane:*i*-PrOH = 90:10, 1.0 mL/min),  $t_R$  = 30.305 min (minor),  $t_R$  = 39.530 min (major)],  $[\alpha]_D^{30} = +29.8$  ( $c = 0.4$ , CHCl<sub>3</sub>).

<sup>1</sup>H NMR (400 MHz, CDCl<sub>3</sub>)  $\delta$  7.70 (d,  $J = 9.0$  Hz, 1H), 7.39 (d,  $J = 7.0$  Hz, 1H), 7.22 – 7.12 (m, 2H), 7.11 – 6.96 (m, 3H), 6.90 (s, 1H), 6.86 – 6.80 (m, 5H), 6.77 (td,  $J = 6.9, 1.2$  Hz, 1H), 6.30 (s, 1H), 3.85 (s, 3H), 2.19 (s, 3H).  
<sup>13</sup>C NMR (100 MHz, CDCl<sub>3</sub>)  $\delta$  165.7, 156.5, 139.4, 136.4, 134.8, 131.4, 131.0, 130.6, 128.6, 128.0, 127.7, 126.5, 124.1, 121.8, 120.0, 118.0, 116.5, 116.1, 115.3, 114.8, 114.6, 114.5, 111.1, 80.5, 51.5, 11.6.

HRMS (ESI-TOF)  $m/z$  : [M+H]<sup>+</sup> Calcd for C<sub>28</sub>H<sub>22</sub>N<sub>2</sub>O<sub>3</sub><sup>+</sup> 448.1656; Found: 448.1649.

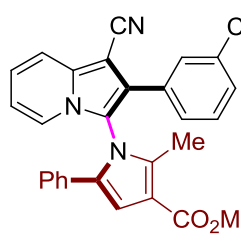

The compound **3j** was prepared according to the general procedure A. The product was obtained as a white solid (31.7 mg, 68% yield.). Melting point: 163-166 °C. The ee (84%) was measured by HPLC using a chiral stationary phase [Daicel ID, *n*-hexane:*i*-PrOH = 90:10, 1.0 mL/min],  $t_R$  = 16.523 min (major),  $t_R$  = 18.260 min (minor),  $[\alpha]_D^{30}$  = +68.2 ( $c$  = 0.2, CHCl<sub>3</sub>).

**<sup>1</sup>H NMR** (400 MHz, CDCl<sub>3</sub>)  $\delta$  7.75 (d,  $J$  = 9.0 Hz, 1H), 7.51 (d,  $J$  = 7.0 Hz, 1H), 7.27 (d,  $J$  = 6.5 Hz, 1H), 7.22 (td,  $J$  = 7.3, 6.8, 2.3 Hz, 2H), 7.15 – 7.09 (m, 2H), 7.08 – 6.99 (m, 3H), 6.90 (s, 1H), 6.85 (td,  $J$  = 6.9, 1.2 Hz, 1H), 6.77 – 6.71 (m, 2H), 3.87 (s, 3H), 2.22 (s, 3H).

**<sup>13</sup>C NMR** (100 MHz, CDCl<sub>3</sub>)  $\delta$  165.4, 139.1, 136.3, 135.0, 135.0, 131.8, 131.0, 130.3, 128.8, 128.7, 128.0, 127.8, 127.1, 126.6, 126.0, 124.3, 121.9, 118.2, 115.9, 115.7, 115.0, 114.9, 111.2, 80.8, 51.4, 11.6.

**HRMS (ESI-TOF)**  $m/z$  : [M+H]<sup>+</sup> Calcd for C<sub>28</sub>H<sub>21</sub>ClN<sub>3</sub>O<sub>2</sub><sup>+</sup> 466.1317; Found: 466.1310.

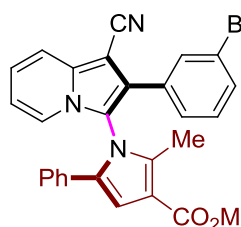

The compound **3k** was prepared according to the general procedure A. The product was obtained as a white solid (35.1 mg, 69% yield). Melting point: 189-193 °C. The ee (93%) was measured by HPLC using a chiral stationary phase [Daicel IE, *n*-hexane:*i*-PrOH = 90:10, 1.0 mL/min],  $t_R$  = 22.018 min (minor),  $t_R$  = 23.965 min (major),  $[\alpha]_D^{30}$  = -57.0 ( $c$  = 0.2, CHCl<sub>3</sub>).

**<sup>1</sup>H NMR** (400 MHz, CDCl<sub>3</sub>)  $\delta$  7.75 (d,  $J$  = 9.0 Hz, 1H), 7.52 (d,  $J$  = 7.0 Hz, 1H), 7.45 – 7.38 (m, 1H), 7.26 (s, 1H), 7.24 – 7.19 (m, 1H), 7.16 (t,  $J$  = 7.8 Hz, 1H), 7.13 – 7.09 (m, 2H), 7.06 (dd,  $J$  = 8.2, 6.4 Hz, 2H), 6.90 (s, 1H), 6.86 (td,  $J$  = 6.9, 1.2 Hz, 1H), 6.76 – 6.71 (m, 2H), 3.87 (s, 3H), 2.22 (s, 3H).

**<sup>13</sup>C NMR** (100 MHz, CDCl<sub>3</sub>)  $\delta$  165.4, 139.1, 136.3, 135.1, 132.1, 131.7, 131.0, 130.9, 130.6, 128.7, 127.8, 127.0, 126.6, 126.4, 124.3, 123.1, 121.9, 118.2, 115.8, 115.7, 115.0, 114.9, 111.2, 80.7, 51.4, 11.6.

**HRMS (ESI-TOF)**  $m/z$  : [M+H]<sup>+</sup> Calcd for C<sub>28</sub>H<sub>21</sub>BrN<sub>3</sub>O<sub>2</sub><sup>+</sup> 510.0812; Found: 510.0805.

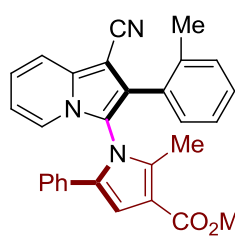

The compound **3l** was prepared according to the general procedure A. The product was obtained as a white solid (28.0 mg, 64% yield.). Melting point: 140-145 °C. The ee (89%) was measured by HPLC using a chiral stationary phase [Daicel ID, *n*-hexane:*i*-PrOH = 90:10, 1.0 mL/min],  $t_R$  = 15.125 min (major)  $t_R$  = 16.935 min (minor),  $[\alpha]_D^{30}$  = -26.4 ( $c$  = 0.4, CHCl<sub>3</sub>).

**<sup>1</sup>H NMR** (400 MHz, CDCl<sub>3</sub>)  $\delta$  7.73 (d,  $J$  = 9.0 Hz, 1H), 7.43 (d,  $J$  = 7.0 Hz, 1H), 7.23 – 7.18 (m, 1H), 7.18 – 7.14 (m, 1H), 7.12 (d,  $J$  = 1.4 Hz, 1H), 7.10 (s, 1H), 7.07 (m, 2H), 7.06 – 7.02 (m, 2H), 6.91 (s, 1H), 6.86 – 6.81 (m, 2H), 6.78 (td,  $J$  = 6.9, 1.2 Hz, 1H), 3.86 (s, 3H), 2.28 (s, 3H), 2.18 (s, 3H).

**<sup>13</sup>C NMR** (100 MHz, CDCl<sub>3</sub>)  $\delta$  165.5, 139.4, 138.8, 136.3, 134.9, 131.2, 130.0, 129.5, 129.0, 128.7, 128.6, 128.3, 127.6, 126.5, 124.9, 123.9, 121.8, 118.0, 116.4, 115.3, 114.7, 114.5, 111.0, 80.7, 51.3, 21.6, 11.6.

**HRMS (ESI-TOF)**  $m/z$  : [M+H]<sup>+</sup> Calcd for C<sub>29</sub>H<sub>24</sub>N<sub>3</sub>O<sub>2</sub><sup>+</sup> 446.1863; Found: 446.1864.

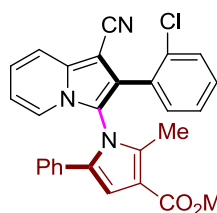

The compound **3m** was prepared according to the general procedure A. The product was obtained as a white solid (36.8 mg, 79% yield). Melting point: 193-196 °C. The ee (93%) was measured by HPLC using a chiral stationary phase [Daicel ID, *n*-hexane:*i*-PrOH = 80:20, 1.0 mL/min),  $t_R$  = 11.500 min (major),  $t_R$  = 12.823 min (minor)],  $[\alpha]_D^{30} = +73.3$  (c = 0.4, CHCl<sub>3</sub>).

**<sup>1</sup>H NMR** (400 MHz, CDCl<sub>3</sub>) δ 7.80 (d, *J* = 9.0 Hz, 1H), 7.64 (d, *J* = 7.0 Hz, 1H), 7.33 (d, *J* = 8.1 Hz, 1H), 7.30 – 7.27 (m, 1H), 7.25 (d, *J* = 4.7 Hz, 1H), 7.23 – 7.13 (m, 2H), 7.09 (t, *J* = 7.5 Hz, 2H), 7.01 – 6.88 (m, 2H), 6.75 (s, 1H), 6.62 (d, *J* = 7.2 Hz, 2H), 3.84 (s, 3H), 2.31 (s, 3H).

**<sup>13</sup>C NMR** (100 MHz, CDCl<sub>3</sub>) δ 165.5, 139.6, 135.5, 135.3, 131.6, 131.4, 130.1, 129.9, 128.7, 127.6, 127.1, 126.7, 124.0, 122.0, 118.4, 116.7, 115.5, 114.8, 114.6, 110.7, 83.7, 51.3, 12.0.

**HRMS (ESI-TOF)** *m/z* : [M+H]<sup>+</sup> Calcd for C<sub>28</sub>H<sub>21</sub>ClN<sub>3</sub>O<sub>2</sub><sup>+</sup> 466.1317; Found: 466.1302.

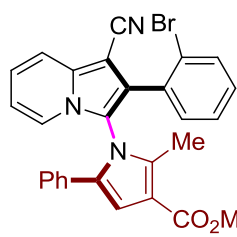

The compound **3n** was prepared according to the general procedure A with 5 mol% **C7**. The product was obtained as a white solid (33.6 mg, 66% yield). Melting point: 178-181 °C. The ee (90%) was measured by HPLC using a chiral stationary phase [Daicel ID, *n*-hexane:*i*-PrOH = 80:20, 1.0 mL/min),  $t_R$  = 12.307 min (major),  $t_R$  = 13.583 min (minor)],  $[\alpha]_D^{30} = -37.5$  (c = 0.4, CHCl<sub>3</sub>).

**<sup>1</sup>H NMR** (400 MHz, CDCl<sub>3</sub>) δ 7.80 (d, *J* = 9.0 Hz, 1H), 7.63 (d, *J* = 7.0 Hz, 1H), 7.53 (d, *J* = 8.2 Hz, 1H), 7.34 – 7.27 (m, 1H), 7.18 (d, *J* = 7.1 Hz, 1H), 7.13 (d, *J* = 8.0 Hz, 3H), 6.94 (td, *J* = 6.9, 1.2 Hz, 2H), 6.80 (s, 1H), 6.67 – 6.61 (m, 2H), 6.18 (d, *J* = 7.4 Hz, 1H), 3.83 (s, 3H), 2.32 (s, 3H).

**<sup>13</sup>C NMR** (100 MHz, CDCl<sub>3</sub>) δ 165.5, 139.8, 135.4, 133.0, 131.8, 130.7, 130.3, 128.8, 127.7, 127.1, 126.5, 124.0, 122.1, 118.4, 116.5, 115.4, 114.9, 114.6, 110.8, 83.9, 51.3, 12.2.

**HRMS (ESI-TOF)** *m/z* : [M+H]<sup>+</sup> Calcd for C<sub>28</sub>H<sub>21</sub>BrN<sub>3</sub>O<sub>2</sub><sup>+</sup> 510.0812; Found: 510.0803.

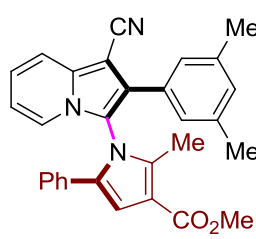

The compound **3o** was prepared according to the general procedure A with 5 mol% **C7**. The product was obtained as a white solid (12.4 mg, 54% yield). Melting point: 163-167 °C. The ee (90%) was measured by HPLC using a chiral stationary phase [Daicel ID, *n*-hexane:*i*-PrOH = 80:20, 1.0 mL/min),  $t_R$  = 8.263 min (major),  $t_R$  = 9.148 min (minor)],  $[\alpha]_D^{30} = -42.18$  (c = 0.2, CHCl<sub>3</sub>).

**<sup>1</sup>H NMR** (400 MHz, CDCl<sub>3</sub>) δ 7.75 – 7.68 (m, 1H), 7.43 (dt, *J* = 7.0, 1.1 Hz, 1H), 7.15 (ddd, *J* = 9.0, 6.8, 1.0 Hz, 1H), 7.12 – 6.98 (m, 3H), 6.93 (d, *J* = 5.4 Hz, 2H), 6.87 – 6.83 (m, 4H), 6.78 (td, *J* = 6.9, 1.2 Hz, 1H), 3.86 (s, 3H), 2.23 (s, 6H), 2.17 (s, 3H).

**<sup>13</sup>C NMR** (100 MHz, CDCl<sub>3</sub>) δ 165.5, 139.5, 138.5, 136.2, 135.0, 131.2, 130.4, 129.9, 128.9, 128.6, 127.6, 126.5, 125.7, 123.8, 121.8, 117.9, 116.3, 115.2, 114.6, 114.4, 110.9, 80.8, 51.3, 21.5, 11.5.

**HRMS (ESI-TOF)** *m/z* : [M+H]<sup>+</sup> Calcd for C<sub>30</sub>H<sub>26</sub>N<sub>3</sub>O<sub>2</sub><sup>+</sup> 460.2020; Found: 460.2015.

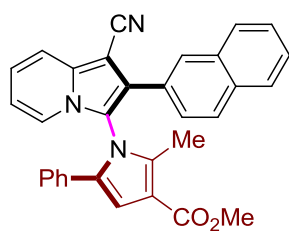

The compound **3p** was prepared according to the general procedure A with 5 mol% **C7**. The product was obtained as a light yellow solid (18.8 mg, 39% yield). Melting point: 183-187 °C. The ee (95%) was measured by HPLC using a chiral stationary phase [Daicel IE, *n*-hexane:*i*-PrOH = 70:30, 1.0 mL/min),  $t_R = 26.847$  min (minor),  $t_R = 44.000$  min (major)],  $[\alpha]_D^{30} = -73.8$  (c = 0.2, CHCl<sub>3</sub>).

<sup>1</sup>H NMR (400 MHz, CDCl<sub>3</sub>) δ 7.80 (q, *J* = 3.5 Hz, 2H), 7.78 – 7.66 (m, 3H), 7.52 – 7.41 (m, 3H), 7.35 (dd, *J* = 8.5, 1.9 Hz, 1H), 7.19 (ddd, *J* = 9.0, 6.8, 1.1 Hz, 1H), 7.13 – 7.07 (m, 1H), 7.07 – 6.99 (m, 2H), 6.95 (s, 1H), 6.88 – 6.84 (m, 2H), 6.81 (td, *J* = 6.9, 1.2 Hz, 1H), 3.86 (s, 3H), 2.21 (s, 3H).

<sup>13</sup>C NMR (100 MHz, CDCl<sub>3</sub>) δ 165.4, 139.4, 136.4, 134.9, 133.4, 133.0, 131.1, 129.0, 128.7, 128.6, 128.4, 127.7, 127.7, 127.5, 126.9, 126.5, 126.5, 124.9, 124.1, 121.8, 118.0, 116.4, 115.5, 114.9, 114.6, 111.1, 80.8, 51.3, 11.6.

HRMS (ESI-TOF) *m/z* : [M+H]<sup>+</sup> Calcd for C<sub>32</sub>H<sub>24</sub>N<sub>3</sub>O<sub>2</sub><sup>+</sup> 482.1863; Found: 482.1858.

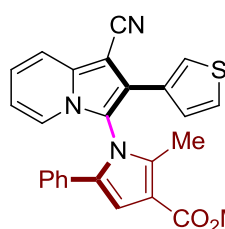

The compound **3q** was prepared according to the general procedure A. The product was obtained as a white solid (33.2 mg, 76% yield). Melting point: 174-179 °C. The ee (93%) was measured by HPLC using a chiral stationary phase [Daicel IE, *n*-hexane:*i*-PrOH = 70:30, 1.0 mL/min),  $t_R = 8.021$  min (minor),  $t_R = 8.730$  min (major)],  $[\alpha]_D^{30} = +32.7$  (c = 0.2, CHCl<sub>3</sub>).

<sup>1</sup>H NMR (400 MHz, CDCl<sub>3</sub>) δ 7.68 (dt, *J* = 9.0, 1.2 Hz, 1H), 7.47 (dd, *J* = 2.9, 1.4 Hz, 1H), 7.38 (d, *J* = 7.0 Hz, 1H), 7.32 (dd, *J* = 5.1, 2.9 Hz, 1H), 7.14 (ddd, *J* = 9.0, 6.8, 1.1 Hz, 1H), 7.11 – 7.00 (m, 3H), 6.98 (s, 1H), 6.95 – 6.88 (m, 2H), 6.76 (td, *J* = 6.9, 1.3 Hz, 1H), 3.89 (s, 3H), 2.17 (s, 3H).

<sup>13</sup>C NMR (100 MHz, CDCl<sub>3</sub>) δ 165.4, 139.3, 136.2, 134.6, 130.9, 130.4, 128.7, 127.8, 126.8, 126.6, 125.8, 124.1, 124.1, 123.8, 121.7, 117.8, 116.8, 115.1, 114.6, 114.5, 111.3, 79.7, 51.4, 11.4.

HRMS (ESI-TOF) *m/z* : [M+H]<sup>+</sup> Calcd for C<sub>26</sub>H<sub>20</sub>N<sub>3</sub>O<sub>2</sub>S<sup>+</sup> 438.1271; Found: 438.1281.

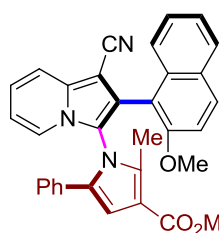

The compound **3r** was prepared according to the general procedure A. The product was obtained as a white solid (28.6 mg, 56% yield). Melting point: 253-257 °C. The ee (89%) was measured by HPLC using a chiral stationary phase [Daicel ID, *n*-hexane:*i*-PrOH = 70:30, 1 mL/min),  $t_R = 11.690$  min (minor),  $t_R = 18.183$  min (major)],  $[\alpha]_D^{30} = -39.3$  (c = 0.4, CHCl<sub>3</sub>).

<sup>1</sup>H NMR (400 MHz, CDCl<sub>3</sub>) δ 7.86 – 7.83 (m, 2H), 7.77 (d, *J* = 9.2 Hz, 1H), 7.61 (d, *J* = 8.2 Hz, 1H), 7.32 – 7.27 (m, 1H), 7.15 – 7.10 (m, 2H), 7.04 – 6.98 (m, 1H), 6.97 – 6.91 (m, 1H), 6.83 – 6.70 (m, 3H), 6.50 (d, *J* = 8.5 Hz, 1H), 6.47 (s, 1H), 6.34 – 6.26 (m, 2H), 3.83 (s, 3H), 3.67 (s, 3H), 2.43 (s, 3H).

<sup>13</sup>C NMR (100 MHz, CDCl<sub>3</sub>) δ 165.7, 165.4, 140.4, 139.7, 135.9, 135.5, 133.9, 133.1, 132.9, 131.6, 131.5, 131.1, 128.9, 128.5, 128.5, 128.4, 128.2, 127.6, 127.4, 127.3, 127.1, 126.9, 126.9, 125.9, 124.6, 124.4, 124.1, 123.9, 123.8, 123.3, 123.2, 123.1, 122.3, 121.9, 118.3, 118.2, 117.7, 117.5, 116.0, 115.6, 114.5, 113.8, 113.8, 113.7, 112.4, 111.9, 111.5, 111.4, 110.5, 110.2, 84.9, 84.8, 55.7, 55.2, 51.2, 51.1, 12.1, 11.7.

HRMS (ESI-TOF) *m/z* : [M+H]<sup>+</sup> Calcd for C<sub>33</sub>H<sub>26</sub>N<sub>3</sub>O<sub>3</sub><sup>+</sup> 512.1969; Found: 512.1962.



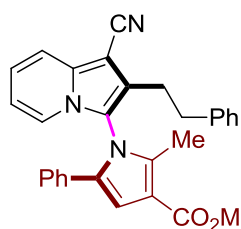

The compound **3s** was prepared according to the general procedure A. The product was obtained as a white solid (25.2 mg, 55% yield). Melting point: 170-175 °C. The ee (87%) was measured by HPLC using a chiral stationary phase [Daicel IE, *n*-hexane:*i*-PrOH = 70:30, 1.0 mL/min),  $t_R$  = 8.218 min (minor),  $t_R$  = 9.210 min (major)],  $[\alpha]_D^{30}$  = -72.6 (c = 0.2, CHCl<sub>3</sub>).

<sup>1</sup>H NMR (400 MHz, CDCl<sub>3</sub>) δ 7.69 (d, *J* = 9.0 Hz, 1H), 7.47 (d, *J* = 6.9 Hz, 1H), 7.25 – 7.18 (m, 4H), 7.16 (dd, *J* = 2.6, 1.7 Hz, 3H), 7.15 – 7.11 (m, 2H), 6.93 (s, 1H), 6.87 – 6.80 (m, 3H), 3.89 (s, 3H), 2.77 (ddd, *J* = 12.9, 10.1, 6.7 Hz, 1H), 2.69 – 2.57 (m, 2H), 2.45 (ddd, *J* = 12.9, 9.4, 5.8 Hz, 1H), 2.07 (s, 3H).

<sup>13</sup>C NMR (100 MHz, CDCl<sub>3</sub>) δ 165.5, 140.7, 139.8, 135.7, 135.5, 131.2, 129.4, 128.8, 128.6, 128.4, 127.8, 126.6, 126.4, 123.6, 121.7, 117.9, 116.2, 116.0, 114.5, 114.3, 110.7, 81.7, 51.4, 34.7, 27.0, 11.3.

HRMS (ESI-TOF) *m/z* : [M+H]<sup>+</sup> Calcd for C<sub>30</sub>H<sub>26</sub>N<sub>3</sub>O<sub>2</sub><sup>+</sup> 460.2020; Found: 420.2019.

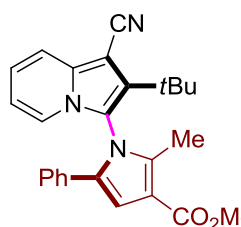

The compound **3t** was prepared according to the general procedure A with 1 mol% **C7**. The product was obtained as a white solid (13.2 mg, 64% yield). Melting point: 169-173 °C. The ee (86%) was measured by HPLC using a chiral stationary phase [Daicel IE, *n*-hexane:*i*-PrOH = 95:5, 1.0 mL/min),  $t_R$  = 21.971 min (minor),  $t_R$  = 23.682 min (major)],  $[\alpha]_D^{30}$  = +43.2 (c = 0.2, CHCl<sub>3</sub>).

<sup>1</sup>H NMR (400 MHz, CDCl<sub>3</sub>) δ 7.70 (d, *J* = 9.0 Hz, 1H), 7.33 (d, *J* = 7.0 Hz, 1H), 7.19 (ddd, *J* = 8.9, 6.7, 1.0 Hz, 1H), 7.15 – 7.03 (m, 3H), 6.94 (s, 1H), 6.83 (td, *J* = 6.8, 1.2 Hz, 1H), 6.77 – 6.69 (m, 2H), 3.88 (s, 3H), 2.24 (s, 3H), 1.08 (s, 9H).

<sup>13</sup>C NMR (100 MHz, CDCl<sub>3</sub>) δ 165.6, 139.7, 137.5, 136.6, 135.8, 131.4, 128.8, 127.7, 126.6, 123.9, 121.5, 117.6, 117.2, 114.5, 114.3, 114.1, 110.6, 81.1, 51.3, 32.9, 29.8, 11.6.

HRMS (ESI-TOF) *m/z* : [M+H]<sup>+</sup> Calcd for C<sub>26</sub>H<sub>26</sub>N<sub>3</sub>O<sub>2</sub><sup>+</sup> 412.2020; Found: 412.2023.

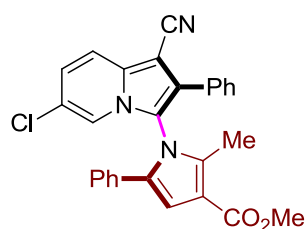

The compound **3u** was prepared according to the general procedure B. The product was obtained as a white solid (19.1 mg, 82% yield). Melting point: 192-197 °C. The ee (95%) was measured by HPLC using a chiral stationary phase [Daicel IE, *n*-hexane:*i*-PrOH = 90:10, 1.0 mL/min),  $t_R$  = 14.096 min (minor),  $t_R$  = 15.431 min (major)],  $[\alpha]_D^{30}$  = +33.1 (c = 0.2, CHCl<sub>3</sub>).

<sup>1</sup>H NMR (400 MHz, CDCl<sub>3</sub>) δ 7.67 (dd, *J* = 9.4, 0.9 Hz, 1H), 7.48 – 7.43 (m, 1H), 7.36 – 7.30 (m, 3H), 7.27 – 7.21 (m, 2H), 7.16 – 7.10 (m, 2H), 7.07 (dd, *J* = 8.3, 6.4 Hz, 2H), 6.92 (s, 1H), 6.85 – 6.76 (m, 2H), 3.88 (s, 3H), 2.21 (s, 3H).

<sup>13</sup>C NMR (100 MHz, CDCl<sub>3</sub>) δ 165.4, 139.0, 134.7, 134.2, 130.9, 129.7, 129.3, 129.2, 129.0, 128.7, 127.9, 127.8, 126.5, 125.4, 123.3, 119.6, 118.5, 115.8, 115.7, 115.1, 111.3, 82.1, 51.4, 11.6.

HRMS (ESI-TOF) *m/z* : [M+H]<sup>+</sup> Calcd for C<sub>28</sub>H<sub>21</sub>ClN<sub>3</sub>O<sub>2</sub><sup>+</sup> 466.1317; Found: 466.1304.



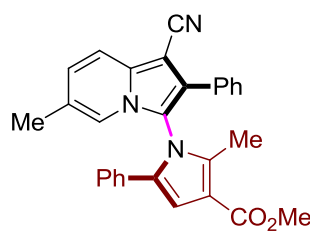

The compound **3v** was prepared according to the general procedure B with 1 mol% **C7**. The product was obtained as a white solid (15.6 mg, 70% yield). Melting point: 178-183 °C. The ee (94%) was measured by HPLC using a chiral stationary phase [Daicel IG, *n*-hexane:*i*-PrOH = 90:10, 0.5 mL/min),  $t_R = 32.988$  min (major),  $t_R = 40.188$  min (minor)],  $[\alpha]_D^{30} = -30.3$  ( $c = 0.2$ , CHCl<sub>3</sub>).

**<sup>1</sup>H NMR** (400 MHz, CDCl<sub>3</sub>)  $\delta$  7.64 (d,  $J = 9.1$  Hz, 1H), 7.29 (dd,  $J = 5.3, 1.8$  Hz, 3H), 7.25 – 7.14 (m, 3H), 7.12 – 7.07 (m, 1H), 7.06 – 7.00 (m, 3H), 6.91 (s, 1H), 6.83 – 6.77 (m, 2H), 3.88 (s, 3H), 2.24 (s, 3H), 2.21 (s, 3H).

**<sup>13</sup>C NMR** (100 MHz, CDCl<sub>3</sub>)  $\delta$  165.6, 139.4, 135.2, 134.9, 131.2, 130.3, 129.1, 128.6, 128.5, 128.3, 127.8, 127.6, 127.2, 126.5, 124.8, 119.3, 117.4, 116.6, 114.9, 114.7, 110.9, 80.2, 51.4, 18.6, 11.6.

**HRMS (ESI-TOF)**  $m/z$  :  $[M+H]^+$  Calcd for C<sub>29</sub>H<sub>24</sub>N<sub>3</sub>O<sub>2</sub><sup>+</sup> 446.1863; Found: 446.1858.

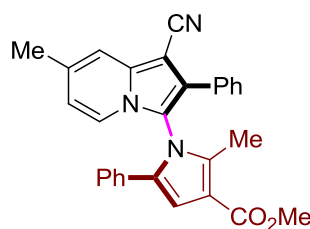

The compound **3w** was prepared according to the general procedure B. The product was obtained as a white solid (12.0 mg, 53% yield). Melting point: 209-211 °C. The ee (93%) was measured by HPLC using a chiral stationary phase [Daicel IE, *n*-hexane:*i*-PrOH = 70:30, 1.0 mL/min),  $t_R = 8.630$  min (minor),  $t_R = 9.805$  min (major)],  $[\alpha]_D^{30} = -38.0$  ( $c = 0.2$ , CHCl<sub>3</sub>).

**<sup>1</sup>H NMR** (400 MHz, CDCl<sub>3</sub>)  $\delta$  7.49 (d,  $J = 1.4$  Hz, 1H), 7.37 – 7.22 (m, 6H), 7.13 – 6.95 (m, 3H), 6.91 (s, 1H), 6.86 – 6.80 (m, 2H), 6.61 (dd,  $J = 7.1, 1.7$  Hz, 1H), 3.87 (s, 3H), 2.40 (d,  $J = 1.1$  Hz, 3H), 2.19 (s, 3H).

**<sup>13</sup>C NMR** (100 MHz, CDCl<sub>3</sub>)  $\delta$  165.5, 139.4, 136.9, 135.3, 134.8, 131.1, 130.3, 129.1, 128.6, 128.5, 128.1, 127.8, 127.6, 126.4, 121.3, 117.2, 116.7, 116.4, 114.7, 114.6, 111.0, 79.0, 51.3, 21.4, 11.5.

**HRMS (ESI-TOF)**  $m/z$  :  $[M+H]^+$  Calcd for C<sub>29</sub>H<sub>24</sub>N<sub>3</sub>O<sub>2</sub><sup>+</sup> 446.1863; Found: 446.1867.

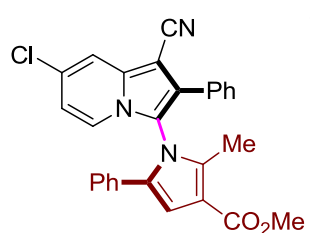

The compound **3x** was prepared according to the general procedure B with 5 mol% **C7**. The product was obtained as a white solid (18.5 mg, 78% yield). Melting point: 168-173 °C. The ee (94%) was measured by HPLC using a chiral stationary phase [Daicel ID, *n*-hexane:*i*-PrOH = 70:30, 1.0 mL/min),  $t_R = 6.970$  min (major),  $t_R = 7.568$  min (minor)],  $[\alpha]_D^{30} = -56.5$  ( $c = 0.2$ , CHCl<sub>3</sub>).

**<sup>1</sup>H NMR** (400 MHz, CDCl<sub>3</sub>)  $\delta$  7.72 (dd,  $J = 2.1, 0.9$  Hz, 1H), 7.38 – 7.31 (m, 4H), 7.30 – 7.22 (m, 2H), 7.15 – 6.99 (m, 3H), 6.92 (s, 1H), 6.85 – 6.81 (m, 2H), 6.74 (dd,  $J = 7.4, 2.1$  Hz, 1H), 3.87 (s, 3H), 2.19 (s, 3H).

**<sup>13</sup>C NMR** (100 MHz, CDCl<sub>3</sub>)  $\delta$  165.4, 139.2, 136.0, 134.7, 131.1, 130.9, 129.7, 129.3, 129.0, 129.0, 128.7, 127.9, 127.8, 126.4, 122.5, 116.8, 116.2, 115.7, 115.6, 115.1, 111.3, 80.9, 51.4, 11.6.

**HRMS (ESI-TOF)**  $m/z$  :  $[M+H]^+$  Calcd for C<sub>28</sub>H<sub>21</sub>ClN<sub>3</sub>O<sub>2</sub><sup>+</sup> 466.1317; Found: 466.1309.

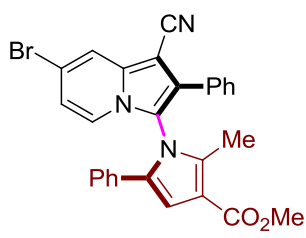

The compound **3y** was prepared according to the general procedure B. The product was obtained as a white solid (20.4 mg, 80% yield). Melting point: 173-179 °C. The ee (89%) was measured by HPLC using a chiral stationary phase [Daicel ID, *n*-hexane:*i*-PrOH = 80:20, 1.0 mL/min),  $t_R$  = 9.646 min (major),  $t_R$  = 10.811 min (minor)],  $[\alpha]_D^{30} = +33.6$  (c = 0.2, CHCl<sub>3</sub>).

**<sup>1</sup>H NMR** (400 MHz, CDCl<sub>3</sub>) δ 7.91 (d, *J* = 1.9 Hz, 1H), 7.32 (d, *J* = 2.9 Hz, 6H), 7.29 – 7.22 (m, 1H), 7.12 (d, *J* = 7.1 Hz, 1H), 7.07 (t, *J* = 7.4 Hz, 1H), 6.91 (s, 1H), 6.87 – 6.78 (m, 3H), 3.87 (s, 3H), 2.18 (s, 3H).

**<sup>13</sup>C NMR** (100 MHz, CDCl<sub>3</sub>) δ 165.4, 139.1, 136.4, 134.7, 130.9, 129.7, 129.3, 129.0, 128.9, 128.8, 127.9, 127.8, 126.5, 122.4, 120.2, 118.5, 118.4, 115.7, 115.7, 115.1, 111.3, 80.8, 51.4, 11.6.

**HRMS (ESI-TOF)** *m/z* : [M+H]<sup>+</sup> Calcd for C<sub>28</sub>H<sub>21</sub>BrN<sub>3</sub>O<sub>2</sub><sup>+</sup> 510.0812; Found: 510.0804.

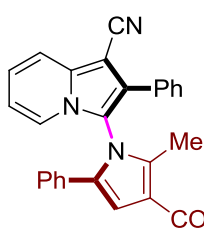

The compound **3z** was prepared according to the general procedure B. The product was obtained as a white solid (18.5 mg, 83% yield). Melting point: 172-175 °C. The ee (88%) was measured by HPLC using a chiral stationary phase [Daicel IE, *n*-hexane:*i*-PrOH = 80:20, 1.0 mL/min),  $t_R$  = 10.528 min (minor),  $t_R$  = 11.865 min (major)],  $[\alpha]_D^{30} = +94.3$  (c = 0.2, CHCl<sub>3</sub>).

**<sup>1</sup>H NMR** (400 MHz, CDCl<sub>3</sub>) δ 7.76 – 7.70 (m, 1H), 7.43 (dt, *J* = 7.0, 1.1 Hz, 1H), 7.34 – 7.23 (m, 5H), 7.17 (ddd, *J* = 9.0, 6.8, 1.1 Hz, 1H), 7.11 – 6.98 (m, 3H), 6.93 (s, 1H), 6.86 – 6.75 (m, 3H), 4.33 (d, *J* = 7.1 Hz, 2H), 2.20 (s, 3H), 1.39 (s, 3H).

**<sup>13</sup>C NMR** (100 MHz, CDCl<sub>3</sub>) δ 165.1, 134.0, 136.3, 134.7, 131.1, 130.1, 129.2, 128.7, 128.6, 128.4, 127.9, 127.6, 126.4, 124.0, 121.8, 118.0, 116.4, 115.3, 115.1, 114.5, 111.1, 80.6, 60.1, 14.6, 11.6.

**HRMS (ESI-TOF)** *m/z* : [M+H]<sup>+</sup> Calcd for C<sub>29</sub>H<sub>24</sub>N<sub>3</sub>O<sub>2</sub><sup>+</sup> 446.1863; Found: 446.1860.

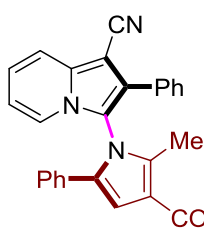

The compound **3aa** was prepared according to the general procedure B. The product was obtained as a light yellow solid (19.2 mg, 84% yield). Melting point: 165-170 °C. The ee (90%) was measured by HPLC using a chiral stationary phase [Daicel IE-H, *n*-hexane:*i*-PrOH = 80:20, 1.0 mL/min),  $t_R$  = 10.188 min (minor),  $t_R$  = 11.212 min (major)],  $[\alpha]_D^{30} = -61.1$  (c = 0.2, CHCl<sub>3</sub>).

**<sup>1</sup>H NMR** (400 MHz, CDCl<sub>3</sub>) δ 7.73 (d, *J* = 9.0 Hz, 1H), 7.43 (d, *J* = 7.0 Hz, 1H), 7.32 (dt, *J* = 4.8, 2.5 Hz, 3H), 7.29 – 7.21 (m, 3H), 7.17 (ddd, *J* = 9.0, 6.8, 1.1 Hz, 1H), 7.10 – 6.97 (m, 3H), 6.94 (s, 1H), 6.84 – 6.72 (m, 3H), 6.05 (ddt, *J* = 17.3, 10.4, 5.6 Hz, 1H), 5.42 (dd, *J* = 17.2, 1.6 Hz, 1H), 5.28 (dd, *J* = 10.4, 1.4 Hz, 1H), 4.79 (d, *J* = 5.6 Hz, 2H), 2.21 (s, 3H).

**<sup>13</sup>C NMR** (100 MHz, CDCl<sub>3</sub>) δ 164.7, 139.5, 136.3, 134.9, 132.8, 131.1, 130.1, 129.2, 128.7, 128.6, 128.5, 127.9, 127.7, 126.5, 124.0, 121.8, 118.1, 118.0, 116.4, 115.3, 114.8, 114.6, 111.2, 80.7, 64.9, 11.6.

**HRMS (ESI-TOF)** *m/z* : [M+H]<sup>+</sup> Calcd for C<sub>30</sub>H<sub>24</sub>N<sub>3</sub>O<sub>2</sub><sup>+</sup> 458.1863; Found: 458.1856.

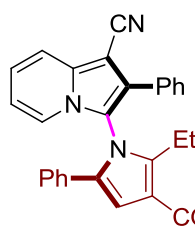

The compound **3ab** was prepared according to the general procedure B. The product was obtained as a white solid (17.8 mg, 80% yield). Melting point: 163-169 °C. The ee (91%) was measured by HPLC using a chiral stationary phase [Daicel IE, *n*-hexane:*i*-PrOH = 80:20, 1.0 mL/min),  $t_R$  = 9.325 min (minor),  $t_R$  = 10.130 min (major)],  $[\alpha]_D^{30} = +62.0$  (c = 0.2, CHCl<sub>3</sub>).

<sup>1</sup>H NMR (400 MHz, CDCl<sub>3</sub>) δ 7.72 (dt, *J* = 9.0, 1.1 Hz, 1H), 7.42 – 7.36 (m, 3H), 7.35 – 7.28 (m, 3H), 7.15 (ddd, *J* = 8.9, 6.8, 1.1 Hz, 1H), 7.11 – 7.02 (m, 3H), 6.99 (s, 1H), 6.90 (dd, *J* = 8.2, 1.6 Hz, 2H), 6.76 (td, *J* = 6.9, 1.2 Hz, 1H), 3.86 (s, 3H), 2.55 (ddq, *J* = 28.9, 14.6, 7.3 Hz, 2H), 0.74 (t, *J* = 7.5 Hz, 3H).

<sup>13</sup>C NMR (100 MHz, CDCl<sub>3</sub>) δ 165.1, 145.4, 136.3, 134.5, 131.1, 130.2, 129.3, 128.8, 128.7, 128.2, 127.9, 127.7, 126.4, 124.0, 121.9, 117.9, 116.5, 115.1, 114.5, 114.3, 111.6, 80.7, 51.3, 19.4, 14.0.

HRMS (ESI-TOF) *m/z* : [M+H]<sup>+</sup> Calcd for C<sub>29</sub>H<sub>24</sub>N<sub>3</sub>O<sub>2</sub><sup>+</sup> 446.1863; Found: 446.1858.

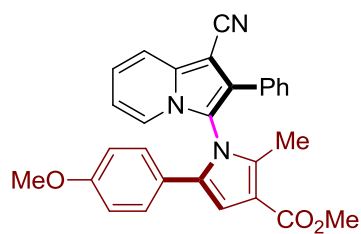

The compound **3ac** was prepared according to the general procedure B. The product was obtained as a white solid (18.7 mg, 81% yield). Melting point: 140-145 °C. The ee (86%) was measured by HPLC using a chiral stationary phase [Daicel ID, *n*-hexane:*i*-PrOH = 80:20, 1.0 mL/min),  $t_R$  = 13.637 min (major),  $t_R$  = 15.035 min (minor)],  $[\alpha]_D^{30} = +89.2$  (c = 0.2, CHCl<sub>3</sub>).

<sup>1</sup>H NMR (400 MHz, CDCl<sub>3</sub>) δ 7.72 (dt, *J* = 9.0, 1.2 Hz, 1H), 7.41 (dt, *J* = 7.0, 1.1 Hz, 1H), 7.36 – 7.28 (m, 5H), 7.16 (ddd, *J* = 9.0, 6.8, 1.1 Hz, 1H), 6.82 (s, 1H), 6.81 – 6.67 (m, 3H), 6.57 (d, *J* = 8.9 Hz, 2H), 3.86 (s, 3H), 3.68 (s, 3H), 2.18 (s, 3H).

<sup>13</sup>C NMR (100 MHz, CDCl<sub>3</sub>) δ 165.6, 159.2, 138.8, 136.3, 134.7, 130.2, 129.2, 128.7, 128.4, 128.0, 127.9, 124.0, 123.6, 121.8, 118.0, 116.4, 115.3, 114.6, 114.5, 114.0, 110.2, 80.6, 55.3, 51.3, 11.5.

HRMS (ESI-TOF) *m/z* : [M+H]<sup>+</sup> Calcd for C<sub>29</sub>H<sub>24</sub>N<sub>3</sub>O<sub>3</sub><sup>+</sup> 462.1812; Found: 462.1810.

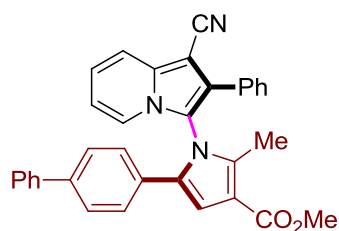

The compound **3ad** was prepared according to the general procedure B. The product was obtained as a white solid (13.0 mg, 51% yield). Melting point: 204-207 °C. The ee (94%) was measured by HPLC using a chiral stationary phase [Daicel OD-H, *n*-hexane:*i*-PrOH = 70:30, 1.0 mL/min),  $t_R$  = 6.830 min (major),  $t_R$  = 8.553 min (minor)],  $[\alpha]_D^{30} = +33.6$  (c = 0.2, CHCl<sub>3</sub>).

<sup>1</sup>H NMR (400 MHz, CDCl<sub>3</sub>) δ 7.78 – 7.71 (m, 1H), 7.46 (ddd, *J* = 8.5, 7.2, 1.4 Hz, 3H), 7.38 (t, *J* = 7.6 Hz, 2H), 7.35 – 7.28 (m, 8H), 7.18 (ddd, *J* = 8.9, 6.8, 1.1 Hz, 1H), 6.98 (s, 1H), 6.91 (d, *J* = 8.4 Hz, 2H), 6.80 (td, *J* = 6.9, 1.2 Hz, 1H), 3.88 (s, 3H), 2.20 (s, 3H).

<sup>13</sup>C NMR (100 MHz, CDCl<sub>3</sub>) δ 165.5, 140.2, 140.2, 139.5, 136.4, 134.4, 130.2, 130.0, 129.3, 128.9, 128.8, 128.5, 127.9, 127.6, 127.3, 126.9, 126.7, 124.1, 121.9, 118.1, 116.4, 115.3, 115.0, 114.7, 111.2, 80.8, 51.4, 11.6.

HRMS (ESI-TOF) *m/z* : [M+H]<sup>+</sup> Calcd for C<sub>34</sub>H<sub>26</sub>N<sub>3</sub>O<sub>2</sub><sup>+</sup> 508.2020; Found: 508.2016.

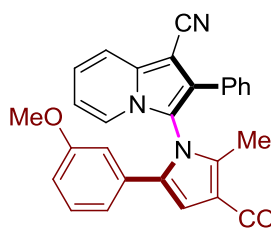

The compound **3ae** was prepared according to the general procedure B. The product was obtained as a light green solid (19.8 mg, 86% yield). Melting point: 177-180 °C. The ee (89%) was measured by HPLC using a chiral stationary phase [Daicel IE, *n*-hexane:*i*-PrOH = 90:10, 1.0 mL/min),  $t_R = 22.883$  min (minor),  $t_R = 24.880$  min (major)],  $[\alpha]_D^{30} = -164.6$  ( $c = 0.1$ , CHCl<sub>3</sub>).

**<sup>1</sup>H NMR** (400 MHz, CDCl<sub>3</sub>)  $\delta$  7.74 (d,  $J = 9.0$  Hz, 1H), 7.44 (d,  $J = 7.0$  Hz, 1H), 7.31 (t,  $J = 3.0$  Hz, 5H), 7.18 (ddd,  $J = 9.0, 6.8, 1.1$  Hz, 1H), 6.96 (t,  $J = 8.0$  Hz, 1H), 6.92 (s, 1H), 6.80 (td,  $J = 6.9, 1.2$  Hz, 1H), 6.64 (ddd,  $J = 8.3, 2.6, 0.9$  Hz, 1H), 6.44 (ddd,  $J = 7.7, 1.7, 1.0$  Hz, 1H), 6.35 (dd,  $J = 2.5, 1.6$  Hz, 1H), 3.87 (s, 3H), 3.46 (s, 3H), 2.19 (s, 3H).

**<sup>13</sup>C NMR** (100 MHz, CDCl<sub>3</sub>)  $\delta$  165.5, 159.6, 139.4, 136.3, 134.7, 132.3, 130.1, 129.7, 129.2, 128.7, 128.4, 127.9, 124.0, 121.9, 118.8, 118.0, 116.3, 115.3, 114.8, 114.6, 114.0, 111.2, 111.2, 80.6, 55.0, 51.4, 11.5.

**HRMS (ESI-TOF)**  $m/z$  :  $[M+H]^+$  Calcd for C<sub>29</sub>H<sub>24</sub>N<sub>3</sub>O<sub>3</sub><sup>+</sup> 462.1812; Found: 462.1806.

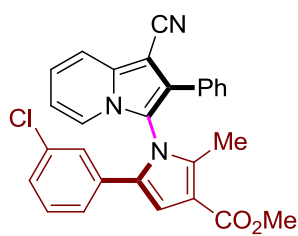

The compound **3af** was prepared according to the general procedure B. The product was obtained as a white solid (16.1 mg, 68% yield). Melting point: 165-171 °C. The ee (88%) was measured by HPLC using a chiral stationary phase [Daicel IE, *n*-hexane:*i*-PrOH = 90:10, 1.0 mL/min),  $t_R = 19.043$  min (minor),  $t_R = 20.550$  min (major)],  $[\alpha]_D^{30} = +111.4$  ( $c = 0.2$ , CHCl<sub>3</sub>).

**<sup>1</sup>H NMR** (400 MHz, CDCl<sub>3</sub>)  $\delta$  7.75 (dt,  $J = 9.0, 1.2$  Hz, 1H), 7.42 (dt,  $J = 7.0, 1.1$  Hz, 1H), 7.33 (dd,  $J = 5.1, 1.9$  Hz, 3H), 7.23 (dd,  $J = 6.6, 3.0$  Hz, 2H), 7.21 – 7.17 (m, 1H), 7.06 (ddd,  $J = 8.1, 2.2, 1.0$  Hz, 1H), 6.99 – 6.88 (m, 2H), 6.87 – 6.75 (m, 2H), 6.54 (dt,  $J = 7.9, 1.2$  Hz, 1H), 3.87 (s, 3H), 2.25 (s, 3H).

**<sup>13</sup>C NMR** (100 MHz, CDCl<sub>3</sub>)  $\delta$  165.3, 139.9, 136.4, 134.4, 133.4, 132.7, 130.0, 129.8, 129.3, 128.8, 128.8, 127.9, 127.7, 127.1, 124.1, 124.0, 121.6, 118.1, 116.2, 115.0, 114.9, 114.8, 111.8, 80.8, 51.4, 11.6.

**HRMS (ESI-TOF)**  $m/z$  :  $[M+H]^+$  Calcd for C<sub>28</sub>H<sub>21</sub>ClN<sub>3</sub>O<sub>2</sub><sup>+</sup> 466.1317; Found: 466.1310.

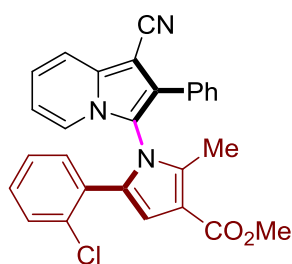

The compound **3ag** was prepared according to the general procedure B. The product was obtained as a white solid (7.2mg, 32% yield). Melting point: 197-199 °C. The ee (25%) was measured by HPLC using a chiral stationary phase [Daicel IE, *n*-hexane:*i*-PrOH = 70:30, 1.0 mL/min),  $t_R = 7.490$  min (major),  $t_R = 8.116$  min (minor)],  $[\alpha]_D^{30} = +95.0$  ( $c = 0.1$ , CHCl<sub>3</sub>).

**<sup>1</sup>H NMR** (400 MHz, CDCl<sub>3</sub>)  $\delta$  7.71 – 7.59 (m, 1H), 7.32 (dd,  $J = 5.1, 2.0$  Hz, 2H), 7.18 (ddd,  $J = 9.1, 6.7, 1.1$  Hz, 1H), 7.10 (dd,  $J = 8.0, 1.3$  Hz, 1H), 7.07 – 6.93 (m, 3H), 6.86 (td,  $J = 6.9, 1.1$  Hz, 1H), 6.77 (s, 1H), 6.72 (td,  $J = 7.5, 1.3$  Hz, 1H), 6.22 (dd,  $J = 7.7, 1.6$  Hz, 1H), 3.89 (s, 3H), 2.40 (s, 3H).

**<sup>13</sup>C NMR** (100 MHz, CDCl<sub>3</sub>)  $\delta$  165.6, 138.8, 136.4, 134.1, 132.1, 131.7, 130.3, 129.8, 129.5, 129.2, 129.1, 128.6, 128.3, 128.1, 126.2, 124.0, 122.7, 117.9, 116.3, 115.0, 114.5, 114.0, 113.3, 80.4, 51.4, 11.9.

**HRMS (ESI-TOF)**  $m/z$  :  $[M+H]^+$  Calcd for C<sub>28</sub>H<sub>21</sub>ClN<sub>3</sub>O<sub>2</sub><sup>+</sup> 466.1317; Found: 466.1329.

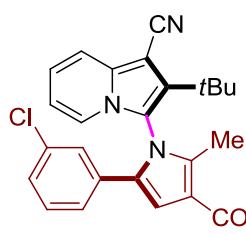

The compound **3ah** was prepared according to the general procedure B with 5 mol% **C7**. The product was obtained as a white solid (11.6 mg, 52% yield). Melting point: 145-149 °C. The ee (89%) was measured by HPLC using a chiral stationary phase [Daicel IG, *n*-hexane:*i*-PrOH = 90:10, 1.0 mL/min),  $t_R$  = 9.736 min (minor),  $t_R$  = 10.951 min (major)],  $[\alpha]_D^{30}$  = -171.2 (c = 0.2, CHCl<sub>3</sub>).

<sup>1</sup>H NMR (400 MHz, CDCl<sub>3</sub>) δ 7.71 (d, *J* = 9.0 Hz, 1H), 7.33 – 7.24 (m, 1H), 7.20 (dd, *J* = 9.0, 6.7 Hz, 1H), 7.13 – 7.08 (m, 1H), 7.04 – 6.96 (m, 2H), 6.91 (s, 1H), 6.83 (td, *J* = 6.9, 1.2 Hz, 1H), 6.48 (dt, *J* = 7.8, 1.3 Hz, 1H), 3.88 (s, 3H), 2.24 (s, 3H), 1.12 (s, 9H).

<sup>13</sup>C NMR (100 MHz, CDCl<sub>3</sub>) δ 165.3, 140.4, 137.6, 136.7, 134.7, 134.1, 133.0, 130.0, 127.6, 126.8, 124.1, 123.9, 121.3, 117.7, 117.0, 114.7, 114.5, 113.6, 111.4, 81.2, 51.4, 32.9, 29.9, 11.6.

HRMS (ESI-TOF) *m/z* : [M+H]<sup>+</sup>Calcd for C<sub>26</sub>H<sub>25</sub>ClN<sub>3</sub>O<sub>2</sub><sup>+</sup> 446.1630; Found: 446.1623.

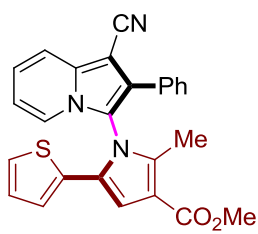

The compound **3ai** was prepared according to the general procedure B. The product was obtained as a light green solid (13.0 mg, 59% yield). Melting point: 180-182 °C. The ee (96%) was measured by HPLC using a chiral stationary phase [Daicel IE, *n*-hexane:*i*-PrOH = 80:20, 1.0 mL/min),  $t_R$  = 12.080 min (minor),  $t_R$  = 13.595 min (major)],  $[\alpha]_D^{30}$  = +71.1 (c = 0.2, CHCl<sub>3</sub>).

<sup>1</sup>H NMR (400 MHz, CDCl<sub>3</sub>) δ 7.79 (d, *J* = 9.0 Hz, 1H), 7.42 – 7.36 (m, 3H), 7.36 – 7.26 (m, 3H), 7.21 (ddd, *J* = 9.0, 6.8, 1.1 Hz, 1H), 7.03 (s, 1H), 6.99 (dd, *J* = 5.1, 1.1 Hz, 1H), 6.83 – 6.74 (m, 2H), 6.61 (dd, *J* = 3.7, 1.2 Hz, 1H), 3.85 (s, 3H), 2.12 (s, 3H).

<sup>13</sup>C NMR (100 MHz, CDCl<sub>3</sub>) δ 165.2, 139.4, 136.6, 132.3, 123.0, 129.6, 129.3, 128.8, 128.0, 127.5, 124.9, 124.3, 123.7, 122.0, 118.0, 116.3, 114.8, 114.7, 114.1, 110.6, 81.0, 51.4, 11.4.

HRMS (ESI-TOF) *m/z* : [M+H]<sup>+</sup>Calcd for C<sub>26</sub>H<sub>20</sub>N<sub>3</sub>O<sub>2</sub>S<sup>+</sup> 438.1271; Found: 438.1273.

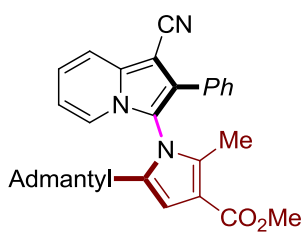

The compound **3aj** was prepared according to the general procedure B. The product was obtained as a white solid (12.3 mg, 50% yield). Melting point: 136-140 °C. The ee (86%) was measured by HPLC using a chiral stationary phase [Daicel IE, *n*-hexane:*i*-PrOH = 95:5, 1.0 mL/min),  $t_R$  = 24.921 min (minor),  $t_R$  = 26.977 min (major)],  $[\alpha]_D^{30}$  = +21.2 (c = 0.2, CHCl<sub>3</sub>).

<sup>1</sup>H NMR (400 MHz, CDCl<sub>3</sub>) δ 7.78 (d, *J* = 8.9 Hz, 1H), 7.47 – 7.42 (m, 2H), 7.40 – 7.31 (m, 3H), 7.25 – 7.15 (m, 1H), 7.06 (dt, *J* = 6.9, 1.1 Hz, 1H), 6.84 (td, *J* = 6.9, 1.2 Hz, 1H), 6.50 (s, 1H), 3.86 (s, 3H), 2.14 (s, 3H), δ 1.58 (s, 3H), 1.51 (d, *J* = 12.6 Hz, 6H), 1.35 (d, *J* = 12.3 Hz, 3H), 1.24 – 1.15 (m, 3H).

<sup>13</sup>C NMR (100 MHz, CDCl<sub>3</sub>) δ 165.8, 144.3, 139.1, 136.3, 130.9, 129.3, 128.8, 127.8, 127.7, 124.1, 122.2, 117.9, 116.8, 116.6, 114.5, 113.5, 108.2, 80.4, 51.3, 41.1, 36.4, 34.4, 28.3, 11.1.

HRMS (ESI-TOF) *m/z* : [M+H]<sup>+</sup>Calcd for C<sub>32</sub>H<sub>30</sub>N<sub>3</sub>O<sub>2</sub><sup>+</sup> 490.2489; Found: 490.2482.

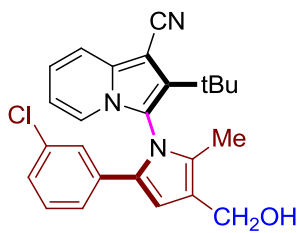

The compound **4** was prepared according to the general procedure. The product was obtained as a light-yellow solid (21.0 mg, 71% yield). Melting point: 250-255 °C. The ee (86%) was measured by HPLC using a chiral stationary phase [Daicel IG, *n*-hexane:*i*-PrOH = 70:30, 1.0 mL/min),  $t_R$  = 4.766 min (major),  $t_R$  = 5.500 min (minor)],  $[\alpha]_D^{30} = -105.1$  (c = 0.2, CHCl<sub>3</sub>).

**<sup>1</sup>H NMR** (400 MHz, CDCl<sub>3</sub>) δ 7.69 (d, *J* = 9.0 Hz, 1H), 7.31 (d, *J* = 6.9 Hz, 1H), 7.17 (ddd, *J* = 8.9, 6.7, 1.1 Hz, 1H), 7.09 – 7.03 (m, 1H), 6.98 (t, *J* = 7.9 Hz, 1H), 6.92 (s, 1H), 6.79 (td, *J* = 6.8, 1.2 Hz, 1H), 6.63 (s, 1H), 6.46 (dt, *J* = 7.9, 1.4 Hz, 1H), 4.63 (s, 2H), 1.95 (s, 3H), 1.14 (s, 9H).

**<sup>13</sup>C NMR** (100 MHz, CDCl<sub>3</sub>) δ 137.2, 136.5, 134.6, 133.9, 133.7, 131.4, 129.9, 126.8, 126.4, 123.9, 123.4, 122.3, 121.7, 117.5, 117.3, 114.9, 114.1, 110.9, 80.8, 57.9, 32.9, 29.9, 9.98.

**HRMS (ESI-TOF)** *m/z* : [M+H]<sup>+</sup> Calcd for C<sub>25</sub>H<sub>25</sub>ClN<sub>3</sub>O<sup>+</sup> 418.1681; Found: 418.1687.

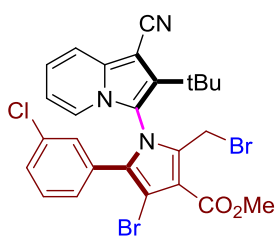

The compound **5** was prepared according to the general procedure. The product was obtained as a white solid (21.6 mg, 72% yield). Melting point: 175-180 °C. The ee (88%) was measured by HPLC using a chiral stationary phase [Daicel IG, *n*-hexane:*i*-PrOH = 70:30, 1.0 mL/min),  $t_R$  = 4.945 min (minor),  $t_R$  = 5.851 min (major)],  $[\alpha]_D^{30} = -23.4$  (c = 0.2, CHCl<sub>3</sub>).

**<sup>1</sup>H NMR** (400 MHz, CDCl<sub>3</sub>) δ 7.65 (d, *J* = 8.9 Hz, 1H), 7.49 (d, *J* = 7.0 Hz, 1H), 7.22 (dd, *J* = 5.0, 2.9 Hz, 2H), 7.11 (t, *J* = 7.9 Hz, 1H), 7.01 (t, *J* = 1.9 Hz, 1H), 6.92 – 6.87 (m, 1H), 6.84 – 6.78 (m, 1H), 4.85 (d, *J* = 10.8 Hz, 1H), 4.33 (d, *J* = 10.8 Hz, 1H), 3.98 (s, 3H), 1.15 (s, 9H).

**<sup>13</sup>C NMR** (100 MHz, CDCl<sub>3</sub>) δ 163.1, 138.4, 137.6, 137.1, 135.6, 134.4, 130.6, 129.8, 129.7, 129.5, 127.5, 124.7, 122.7, 117.4, 116.6, 116.1, 114.0, 110.9, 100.3, 81.7, 52.0, 33.0, 29.8, 21.1.

**HRMS (ESI-TOF)** *m/z* : [M+H]<sup>+</sup> Calcd for C<sub>26</sub>H<sub>23</sub>Br<sub>2</sub>ClN<sub>3</sub>O<sub>2</sub><sup>+</sup> 601.9840; Found: 601.9852.

## 9. X-ray crystallographic analysis

Single crystals suitable for X-ray diffraction experiment were obtained by diffusion method of *n*-hexane/DCM containing the corresponding compound **5**. Data collection was performed at 296.00 K on Bruker D8 Venture diffractometer with a CCD area detector, using graphite monochromated Cu *K* $\alpha$  radiation ( $\lambda = 1.54178 \text{ \AA}$ ).

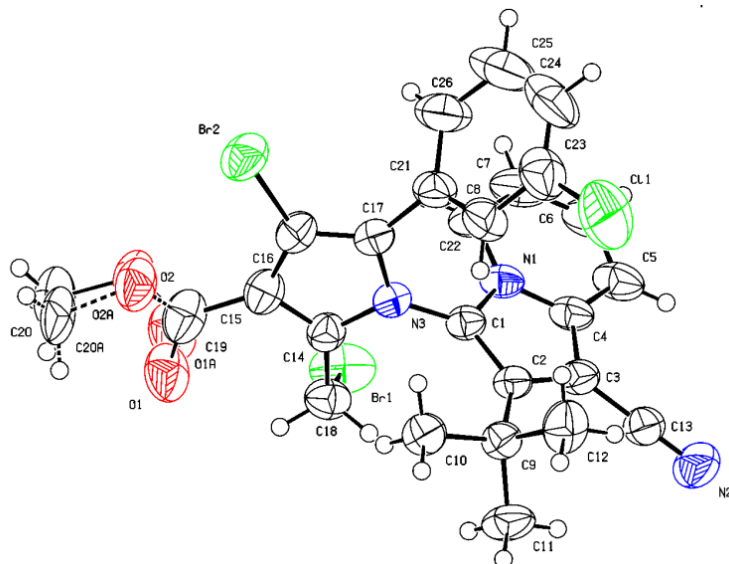

Figure S1. X-ray structure of **5** (ellipsoid contour at 50% probability).

### **Datablock: 20240509d**

|                    |                                            |                            |                            |
|--------------------|--------------------------------------------|----------------------------|----------------------------|
| Bond precision:    | C-C = 0.0089 Å                             | Wavelength=                | 1.54178                    |
| Cell:              | a= 9.9201 (4)<br>alpha=90                  | b= 12.9585 (5)<br>beta= 90 | c= 20.1488 (7)<br>gamma=90 |
| Temperature:       | 296 K                                      |                            |                            |
| Volume             | Calculated<br>2590.12 (17)                 | Reported<br>2590.12 (17)   |                            |
| Space group        | P 21 21 21                                 | P 21 21 21                 |                            |
| Hall group         | P 2ac 2ab                                  | P 2ac 2ab                  |                            |
| Moiety formula     | C26 H22 Br2 C1 N3 O2                       | C26 H22 Br2 C1 N3 O2       |                            |
| Sum formula        | C26 H22 Br2 C1 N3 O2                       | C26 H22 Br2 C1 N3 O2       |                            |
| Mr                 | 603.72                                     | 603.73                     |                            |
| Dx,g cm-3          | 1.548                                      | 1.548                      |                            |
| Z                  | 4                                          | 4                          |                            |
| Mu (mm-1)          | 5.146                                      | 5.146                      |                            |
| F000               | 1208.0                                     | 1208.0                     |                            |
| F000'              | 1206.57                                    |                            |                            |
| h,k,lmax           | 12,16,24                                   | 12,16,24                   |                            |
| Nref               | 5150 [ 2916]                               | 5083                       |                            |
| Tmin,Tmax          | 0.455,0.512                                | 0.283,0.754                |                            |
| Tmin'              | 0.344                                      |                            |                            |
| Correction method= | # Reported T Limits: Tmin=0.283 Tmax=0.754 |                            |                            |
| AbsCorr =          | MULTI-SCAN                                 |                            |                            |
| Data completeness= | 1.74/0.99                                  | Theta(max)=                | 72.539                     |
| R(reflections)=    | 0.0473 ( 4832)                             | wR2(reflections)=          | 0.1287( 5083)              |
| S =                | 1.051                                      | Npar=                      | 341                        |



## 10. Theoretical calculation on the rotational barriers of products

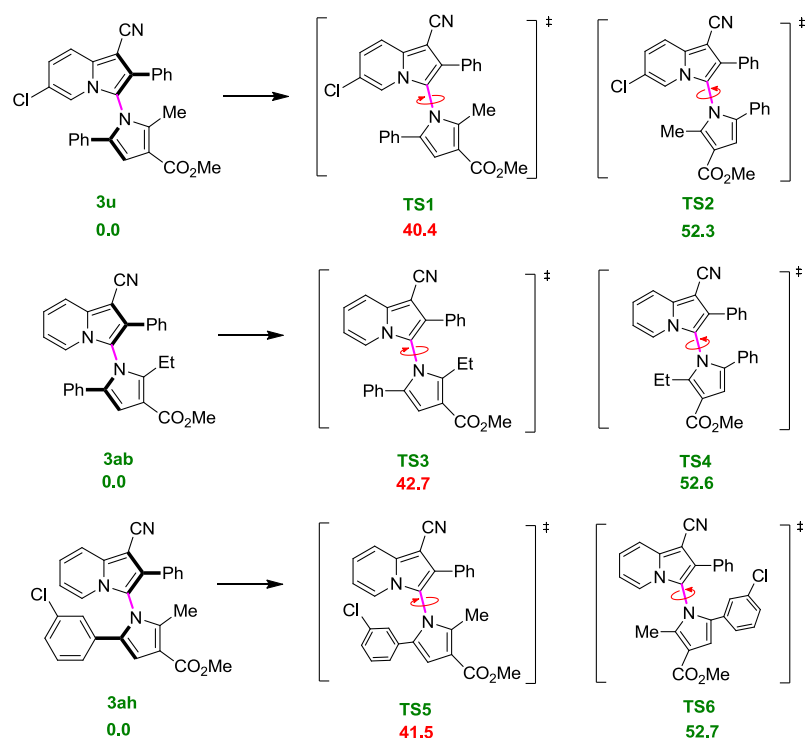

Figure S2. Computational analysis of axial chiral isomerization process calculated at the level of M06-2X/6-311+G(d,p) (SMD, mesitylene)/M06-2X/6-31G(d). The relative free energies are given in kcal/mol.

### Optimized Cartesian Coordinates

Optimized Cartesian coordinates and their corresponding single-point energies ( $E(\text{SCRF})$ , a.u.) calculated at the M06-2X/6-311+G(d,p) (SMD, mesitylene)/M06-2X/6-31G(d) level as well as the imaginary frequency (IF,  $\text{cm}^{-1}$ ) of transition states.

54 (the number of atoms involved in the molecule)

**TS1**,  $E(\text{SCRF}) = -2026.21774849$  a.u., IF =  $i25.4299$   $\text{cm}^{-1}$

|   |              |              |              |
|---|--------------|--------------|--------------|
| C | 1.450255000  | -2.439722000 | 0.224986000  |
| C | 2.431419000  | -0.471517000 | -0.694889000 |
| C | 3.622419000  | -1.113687000 | -0.777855000 |
| C | 3.802226000  | -2.434524000 | -0.274285000 |
| C | 2.704964000  | -3.094829000 | 0.185350000  |
| C | 0.159355000  | -2.905395000 | 0.404174000  |
| C | -0.739091000 | -1.814323000 | 0.240658000  |
| C | 0.034486000  | -0.656725000 | 0.102920000  |
| H | 2.262700000  | 0.478265000  | -1.168472000 |
| H | 4.777150000  | -2.903905000 | -0.326298000 |
| H | 2.741875000  | -4.133282000 | 0.496033000  |
| N | 1.365058000  | -1.070005000 | -0.041556000 |
| C | -0.171173000 | -4.270115000 | 0.616136000  |
| N | -0.410976000 | -5.388803000 | 0.803084000  |
| C | -2.168335000 | -2.064712000 | -0.038382000 |



|    |              |              |              |
|----|--------------|--------------|--------------|
| C  | -2.714950000 | -1.598479000 | -1.238696000 |
| C  | -2.953061000 | -2.844826000 | 0.814313000  |
| C  | -4.039202000 | -1.874317000 | -1.560765000 |
| H  | -2.096999000 | -1.009572000 | -1.911338000 |
| C  | -4.277418000 | -3.120320000 | 0.489457000  |
| H  | -2.527900000 | -3.223336000 | 1.739581000  |
| C  | -4.825557000 | -2.630684000 | -0.693719000 |
| H  | -4.455720000 | -1.502328000 | -2.491561000 |
| H  | -4.881460000 | -3.720492000 | 1.162372000  |
| H  | -5.859251000 | -2.846721000 | -0.944584000 |
| N  | -0.345934000 | 0.714110000  | 0.196894000  |
| C  | 0.464586000  | 1.846314000  | -0.091708000 |
| C  | -1.676429000 | 1.150894000  | 0.278799000  |
| C  | -0.369086000 | 2.888952000  | -0.375815000 |
| C  | -1.703060000 | 2.460635000  | -0.156634000 |
| H  | -0.067379000 | 3.913214000  | -0.544343000 |
| C  | 1.852113000  | 2.035686000  | 0.368696000  |
| C  | 2.293830000  | 1.455955000  | 1.563815000  |
| C  | 2.720111000  | 2.872438000  | -0.342669000 |
| C  | 3.588513000  | 1.682711000  | 2.017550000  |
| H  | 1.618320000  | 0.821630000  | 2.131732000  |
| C  | 4.009711000  | 3.105855000  | 0.121413000  |
| H  | 2.382239000  | 3.319309000  | -1.273912000 |
| C  | 4.452393000  | 2.504481000  | 1.297640000  |
| H  | 3.921055000  | 1.219965000  | 2.941563000  |
| H  | 4.675828000  | 3.748295000  | -0.445923000 |
| H  | 5.463734000  | 2.676518000  | 1.651247000  |
| C  | -2.751528000 | 0.478323000  | 1.084852000  |
| H  | -3.185105000 | 1.245433000  | 1.729423000  |
| H  | -3.562595000 | 0.056074000  | 0.490305000  |
| H  | -2.328221000 | -0.302234000 | 1.715911000  |
| C  | -2.839901000 | 3.387916000  | -0.244500000 |
| O  | -2.737808000 | 4.549166000  | -0.567605000 |
| O  | -4.021822000 | 2.811981000  | 0.052024000  |
| C  | -5.145276000 | 3.686061000  | -0.037549000 |
| H  | -5.244575000 | 4.074460000  | -1.053368000 |
| H  | -6.011313000 | 3.082761000  | 0.230413000  |
| H  | -5.031703000 | 4.526375000  | 0.650700000  |
| Cl | 4.938556000  | -0.325235000 | -1.591973000 |

54

**TS2**,  $E(\text{SCRF}) = -1853.68807079$  a.u.,  $\text{IF} = i14.3368 \text{ cm}^{-1}$

|   |              |              |              |
|---|--------------|--------------|--------------|
| C | 0.770749000  | -2.791681000 | -0.428034000 |
| C | 2.625762000  | -1.375069000 | 0.069679000  |
| C | 3.462089000  | -2.434255000 | -0.050887000 |
| C | 2.992790000  | -3.716117000 | -0.465783000 |
| C | 1.649648000  | -3.887537000 | -0.608400000 |
| C | -0.599608000 | -2.693615000 | -0.256028000 |
| C | -0.929149000 | -1.333481000 | 0.004845000  |
| C | 0.245597000  | -0.592663000 | -0.155882000 |

|    |              |              |              |
|----|--------------|--------------|--------------|
| H  | 2.932006000  | -0.439107000 | 0.503107000  |
| H  | 3.693933000  | -4.532135000 | -0.590893000 |
| H  | 1.212223000  | -4.856472000 | -0.823537000 |
| N  | 1.294538000  | -1.501617000 | -0.287386000 |
| C  | -1.482633000 | -3.806942000 | -0.257099000 |
| N  | -2.178195000 | -4.733734000 | -0.276785000 |
| N  | 0.426388000  | 0.812682000  | -0.267909000 |
| C  | -0.626894000 | 1.726893000  | -0.033542000 |
| C  | 1.630704000  | 1.536511000  | -0.302198000 |
| C  | -0.069348000 | 2.936249000  | 0.262926000  |
| C  | 1.338293000  | 2.822914000  | 0.104676000  |
| C  | -1.999976000 | 1.558723000  | -0.548003000 |
| C  | -2.188124000 | 1.005208000  | -1.820376000 |
| C  | -3.094158000 | 2.098390000  | 0.130679000  |
| C  | -3.455580000 | 0.968191000  | -2.388820000 |
| H  | -1.333237000 | 0.611222000  | -2.363274000 |
| C  | -4.360577000 | 2.062892000  | -0.443038000 |
| H  | -2.949580000 | 2.521663000  | 1.120353000  |
| C  | -4.546967000 | 1.494121000  | -1.700683000 |
| H  | -3.589887000 | 0.536180000  | -3.375892000 |
| H  | -5.206660000 | 2.471583000  | 0.100874000  |
| H  | -5.537349000 | 1.464374000  | -2.144056000 |
| C  | -2.210448000 | -0.985492000 | 0.659142000  |
| C  | -2.168924000 | -0.415755000 | 1.937178000  |
| C  | -3.441371000 | -1.347934000 | 0.110174000  |
| C  | -3.344122000 | -0.186004000 | 2.642090000  |
| H  | -1.207567000 | -0.156603000 | 2.372861000  |
| C  | -4.616391000 | -1.114446000 | 0.817863000  |
| H  | -3.477541000 | -1.797593000 | -0.877577000 |
| C  | -4.571891000 | -0.531735000 | 2.081535000  |
| H  | -3.300775000 | 0.255843000  | 3.632938000  |
| H  | -5.569627000 | -1.388758000 | 0.377048000  |
| H  | -5.490947000 | -0.354743000 | 2.631582000  |
| H  | -0.606501000 | 3.864617000  | 0.396592000  |
| C  | 2.833189000  | 1.166173000  | -1.141792000 |
| H  | 3.754919000  | 0.981697000  | -0.582655000 |
| H  | 2.627130000  | 0.294031000  | -1.763529000 |
| C  | 2.234329000  | 3.998131000  | 0.083268000  |
| O  | 1.830453000  | 5.124601000  | -0.027995000 |
| O  | 3.577830000  | 3.748517000  | 0.120166000  |
| C  | 4.092747000  | 3.004363000  | 1.216665000  |
| H  | 3.444492000  | 2.162714000  | 1.480629000  |
| H  | 5.073868000  | 2.635817000  | 0.914664000  |
| H  | 4.204639000  | 3.657990000  | 2.087225000  |
| Cl | 5.129747000  | -2.233143000 | 0.392707000  |
| H  | 3.036955000  | 2.008649000  | -1.806210000 |

57

**TS3**,  $E(\text{SCRF}) = -1433.40998199$  a.u.,  $\text{IF} = i26.6802 \text{ cm}^{-1}$

|   |             |              |              |
|---|-------------|--------------|--------------|
| C | 1.711091000 | -2.610106000 | -0.120940000 |
|---|-------------|--------------|--------------|

|   |              |              |              |
|---|--------------|--------------|--------------|
| C | 2.816970000  | -0.693047000 | -0.994617000 |
| C | 3.956489000  | -1.411862000 | -1.149402000 |
| C | 4.036852000  | -2.761134000 | -0.697506000 |
| C | 2.908188000  | -3.359431000 | -0.226510000 |
| C | 0.395537000  | -2.988620000 | 0.087692000  |
| C | -0.422384000 | -1.828270000 | -0.003855000 |
| C | 0.424903000  | -0.726273000 | -0.129103000 |
| H | 2.698275000  | 0.285374000  | -1.420106000 |
| H | 4.962748000  | -3.316389000 | -0.794846000 |
| H | 2.866548000  | -4.410211000 | 0.039392000  |
| N | 1.720387000  | -1.227805000 | -0.333097000 |
| C | -0.028338000 | -4.332004000 | 0.262359000  |
| N | -0.346063000 | -5.436342000 | 0.417626000  |
| C | -1.881116000 | -1.947468000 | -0.179733000 |
| C | -2.482637000 | -1.373639000 | -1.305889000 |
| C | -2.658655000 | -2.696208000 | 0.707335000  |
| C | -3.850161000 | -1.505680000 | -1.513125000 |
| H | -1.871266000 | -0.809655000 | -2.005053000 |
| C | -4.027812000 | -2.829917000 | 0.495053000  |
| H | -2.191987000 | -3.159015000 | 1.572283000  |
| C | -4.627315000 | -2.228102000 | -0.608405000 |
| H | -4.310272000 | -1.047426000 | -2.382886000 |
| H | -4.626072000 | -3.405630000 | 1.194061000  |
| H | -5.695796000 | -2.330599000 | -0.769974000 |
| N | 0.128921000  | 0.660186000  | 0.047912000  |
| C | 0.956337000  | 1.750863000  | -0.334209000 |
| C | -1.174053000 | 1.161319000  | 0.247045000  |
| C | 0.149186000  | 2.824693000  | -0.567449000 |
| C | -1.178686000 | 2.461999000  | -0.222645000 |
| H | 0.477280000  | 3.833197000  | -0.776899000 |
| C | 2.377262000  | 1.894697000  | 0.027601000  |
| C | 2.873011000  | 1.312916000  | 1.200612000  |
| C | 3.226002000  | 2.694786000  | -0.746344000 |
| C | 4.199100000  | 1.503143000  | 1.572469000  |
| H | 2.212026000  | 0.707252000  | 1.815389000  |
| C | 4.549514000  | 2.888134000  | -0.366228000 |
| H | 2.844092000  | 3.146154000  | -1.658172000 |
| C | 5.043958000  | 2.286451000  | 0.789574000  |
| H | 4.572180000  | 1.041115000  | 2.481231000  |
| H | 5.198826000  | 3.506260000  | -0.978694000 |
| H | 6.079135000  | 2.432420000  | 1.080815000  |
| C | -2.195102000 | 0.597816000  | 1.210568000  |
| H | -2.784193000 | 1.462553000  | 1.517974000  |
| H | -2.908683000 | -0.088238000 | 0.758591000  |
| C | -2.262487000 | 3.458155000  | -0.268874000 |
| O | -2.086934000 | 4.620164000  | -0.557557000 |
| O | -3.482698000 | 2.952482000  | -0.002795000 |
| C | -4.544342000 | 3.903025000  | -0.064475000 |
| H | -4.615006000 | 4.327858000  | -1.068018000 |

|   |              |              |              |
|---|--------------|--------------|--------------|
| H | -5.449204000 | 3.350875000  | 0.184666000  |
| H | -4.375989000 | 4.712497000  | 0.649009000  |
| H | 4.786212000  | -0.944563000 | -1.665608000 |
| C | -1.559838000 | -0.008965000 | 2.465817000  |
| H | -0.921974000 | 0.727217000  | 2.965282000  |
| H | -2.348320000 | -0.306165000 | 3.163018000  |
| H | -0.953073000 | -0.891965000 | 2.253386000  |

57

**TS4**,  $E(\text{SCRF}) = -1433.39375358$  a.u.,  $\text{IF} = i18.4778$   $\text{cm}^{-1}$

|   |              |              |              |
|---|--------------|--------------|--------------|
| C | 0.697508000  | 3.147042000  | -0.175217000 |
| C | -1.661593000 | 2.961611000  | 0.091346000  |
| C | -1.787482000 | 4.308827000  | -0.000168000 |
| C | -0.655940000 | 5.129022000  | -0.287989000 |
| C | 0.575805000  | 4.549919000  | -0.327992000 |
| C | 1.783933000  | 2.323001000  | 0.066711000  |
| C | 1.309947000  | 0.992425000  | 0.240629000  |
| C | -0.058910000 | 1.004443000  | -0.036497000 |
| H | -2.458562000 | 2.330124000  | 0.441367000  |
| H | -0.771936000 | 6.201260000  | -0.394647000 |
| H | 1.490215000  | 5.123973000  | -0.433482000 |
| N | -0.447274000 | 2.341462000  | -0.163963000 |
| C | 3.116696000  | 2.795629000  | 0.200097000  |
| N | 4.193864000  | 3.214616000  | 0.290445000  |
| N | -0.910997000 | -0.112223000 | -0.299183000 |
| C | -0.388710000 | -1.425886000 | -0.240010000 |
| C | -2.309686000 | -0.197965000 | -0.130057000 |
| C | -1.392014000 | -2.260652000 | 0.155384000  |
| C | -2.588825000 | -1.495921000 | 0.244594000  |
| C | 0.870451000  | -1.844527000 | -0.876410000 |
| C | 1.318624000  | -1.205367000 | -2.038424000 |
| C | 1.559684000  | -2.964923000 | -0.404378000 |
| C | 2.457256000  | -1.659437000 | -2.693089000 |
| H | 0.769004000  | -0.352167000 | -2.425783000 |
| C | 2.692078000  | -3.422254000 | -1.067870000 |
| H | 1.223585000  | -3.451312000 | 0.506685000  |
| C | 3.150665000  | -2.766634000 | -2.208201000 |
| H | 2.799274000  | -1.152425000 | -3.590207000 |
| H | 3.228074000  | -4.283781000 | -0.681587000 |
| H | 4.041003000  | -3.119184000 | -2.719342000 |
| C | 2.158486000  | -0.049311000 | 0.854908000  |
| C | 1.700185000  | -0.720762000 | 1.994417000  |
| C | 3.452233000  | -0.295351000 | 0.388950000  |
| C | 2.512830000  | -1.647104000 | 2.637086000  |
| H | 0.702179000  | -0.511027000 | 2.369988000  |
| C | 4.263979000  | -1.220704000 | 1.036471000  |
| H | 3.812637000  | 0.222104000  | -0.494935000 |
| C | 3.796004000  | -1.902392000 | 2.156700000  |
| H | 2.147438000  | -2.163841000 | 3.519389000  |
| H | 5.263322000  | -1.412781000 | 0.658742000  |

|   |              |              |              |
|---|--------------|--------------|--------------|
| H | 4.431819000  | -2.624320000 | 2.659920000  |
| H | -1.340501000 | -3.338715000 | 0.214016000  |
| C | -3.289003000 | 0.694455000  | -0.875303000 |
| H | -4.039118000 | 1.142009000  | -0.211571000 |
| H | -2.745505000 | 1.508498000  | -1.353097000 |
| C | -3.917935000 | -2.114262000 | 0.437945000  |
| O | -4.136367000 | -3.277690000 | 0.230080000  |
| O | -4.937415000 | -1.286136000 | 0.818000000  |
| C | -4.756999000 | -0.459802000 | 1.961558000  |
| H | -3.810465000 | 0.086933000  | 1.930359000  |
| H | -5.590962000 | 0.242678000  | 1.965338000  |
| H | -4.794133000 | -1.066733000 | 2.871724000  |
| H | -2.754307000 | 4.750643000  | 0.208710000  |
| C | -3.998457000 | -0.077460000 | -1.998414000 |
| H | -4.674753000 | -0.838536000 | -1.607068000 |
| H | -4.588033000 | 0.618049000  | -2.603197000 |
| H | -3.264023000 | -0.561779000 | -2.647732000 |

54

**TS5**,  $E(\text{SCRF}) = -1853.71210094$  a.u.,  $\text{IF} = i24.0576 \text{ cm}^{-1}$

|   |              |              |              |
|---|--------------|--------------|--------------|
| C | -1.131175000 | 2.687611000  | -0.331614000 |
| C | -2.171351000 | 0.864383000  | -1.456760000 |
| C | -3.244720000 | 1.641848000  | -1.741701000 |
| C | -3.338176000 | 2.970829000  | -1.232926000 |
| C | -2.270108000 | 3.495325000  | -0.571395000 |
| C | 0.157037000  | 2.988095000  | 0.079026000  |
| C | 0.928497000  | 1.792009000  | 0.052435000  |
| C | 0.053878000  | 0.742749000  | -0.242951000 |
| H | -2.021505000 | -0.099482000 | -1.908326000 |
| H | -4.218031000 | 3.571185000  | -1.433495000 |
| H | -2.229960000 | 4.529437000  | -0.246827000 |
| N | -1.169969000 | 1.319190000  | -0.610177000 |
| C | 0.614538000  | 4.300090000  | 0.370557000  |
| N | 0.960324000  | 5.379049000  | 0.616705000  |
| C | 2.404322000  | 1.858366000  | 0.032883000  |
| C | 3.091155000  | 1.319091000  | -1.060050000 |
| C | 3.118770000  | 2.537181000  | 1.023042000  |
| C | 4.475552000  | 1.421925000  | -1.139918000 |
| H | 2.531851000  | 0.809958000  | -1.840555000 |
| C | 4.503686000  | 2.639571000  | 0.940635000  |
| H | 2.588292000  | 2.972657000  | 1.865072000  |
| C | 5.185848000  | 2.077055000  | -0.135693000 |
| H | 4.999346000  | 0.994517000  | -1.989212000 |
| H | 5.050428000  | 3.162038000  | 1.719117000  |
| H | 6.266451000  | 2.158337000  | -0.197471000 |
| N | 0.234596000  | -0.667257000 | -0.103194000 |
| C | -0.647670000 | -1.688010000 | -0.546904000 |
| C | 1.456284000  | -1.271971000 | 0.219051000  |
| C | 0.078374000  | -2.837810000 | -0.677234000 |
| C | 1.391659000  | -2.583425000 | -0.212474000 |

|    |              |              |              |
|----|--------------|--------------|--------------|
| H  | -0.318624000 | -3.816875000 | -0.906346000 |
| C  | -2.107023000 | -1.697185000 | -0.349049000 |
| C  | -2.677630000 | -1.039605000 | 0.746236000  |
| C  | -2.928252000 | -2.438087000 | -1.207151000 |
| C  | -4.051128000 | -1.099675000 | 0.938642000  |
| H  | -2.056866000 | -0.476220000 | 1.435973000  |
| C  | -4.299169000 | -2.497700000 | -0.986678000 |
| H  | -2.485156000 | -2.946893000 | -2.058255000 |
| C  | -4.878099000 | -1.819540000 | 0.083094000  |
| H  | -4.929327000 | -3.069873000 | -1.660168000 |
| H  | -5.947563000 | -1.848148000 | 0.257718000  |
| C  | 2.450811000  | -0.729474000 | 1.205423000  |
| H  | 3.397124000  | -0.414754000 | 0.763647000  |
| H  | 2.023603000  | 0.103192000  | 1.762887000  |
| C  | 2.393654000  | -3.652729000 | -0.099912000 |
| O  | 2.198593000  | -4.795544000 | -0.445709000 |
| O  | 3.567632000  | -3.232508000 | 0.410465000  |
| C  | 4.563097000  | -4.248079000 | 0.521274000  |
| H  | 4.796474000  | -4.660134000 | -0.462788000 |
| H  | 5.436355000  | -3.760111000 | 0.951431000  |
| H  | 4.214158000  | -5.056334000 | 1.167491000  |
| H  | -4.005446000 | 1.241098000  | -2.400495000 |
| Cl | -4.753061000 | -0.249696000 | 2.289116000  |
| H  | 2.670021000  | -1.538254000 | 1.904923000  |

54

**TS6**,  $E(\text{SCRF}) = -1853.69386106$  a.u.,  $\text{IF} = i17.3059 \text{ cm}^{-1}$

|   |              |              |              |
|---|--------------|--------------|--------------|
| C | 0.206250000  | 3.231874000  | 0.299824000  |
| C | 2.490511000  | 2.602552000  | 0.038420000  |
| C | 2.878737000  | 3.883370000  | 0.252501000  |
| C | 1.923333000  | 4.883196000  | 0.607961000  |
| C | 0.600277000  | 4.561777000  | 0.589149000  |
| C | -1.009134000 | 2.664136000  | -0.044733000 |
| C | -0.797744000 | 1.289311000  | -0.347479000 |
| C | 0.535959000  | 1.006371000  | -0.043917000 |
| H | 3.152271000  | 1.846131000  | -0.345899000 |
| H | 2.247258000  | 5.896303000  | 0.815747000  |
| H | -0.183073000 | 5.295861000  | 0.744241000  |
| N | 1.170574000  | 2.221455000  | 0.222815000  |
| C | -2.221836000 | 3.394575000  | -0.163364000 |
| N | -3.196989000 | 4.016141000  | -0.242093000 |
| N | 1.180708000  | -0.256912000 | 0.093973000  |
| C | 0.532796000  | -1.466527000 | -0.245754000 |
| C | 2.547434000  | -0.531699000 | 0.256521000  |
| C | 1.494050000  | -2.407770000 | -0.474551000 |
| C | 2.754365000  | -1.829190000 | -0.171280000 |
| C | -0.857468000 | -1.799580000 | 0.117165000  |
| C | -1.361718000 | -1.358535000 | 1.345795000  |
| C | -1.610678000 | -2.681559000 | -0.659899000 |
| C | -2.619003000 | -1.778044000 | 1.754335000  |

|    |              |              |              |
|----|--------------|--------------|--------------|
| H  | -0.779149000 | -0.693746000 | 1.975468000  |
| C  | -2.863319000 | -3.099101000 | -0.224962000 |
| H  | -1.220610000 | -3.013622000 | -1.616813000 |
| C  | -3.384209000 | -2.646961000 | 0.984027000  |
| H  | -3.450270000 | -3.772735000 | -0.841186000 |
| H  | -4.364672000 | -2.957108000 | 1.327470000  |
| C  | -1.792181000 | 0.535782000  | -1.143151000 |
| C  | -1.412000000 | 0.047563000  | -2.398671000 |
| C  | -3.125170000 | 0.428961000  | -0.740962000 |
| C  | -2.345669000 | -0.564524000 | -3.226416000 |
| H  | -0.379229000 | 0.154561000  | -2.719781000 |
| C  | -4.056985000 | -0.185475000 | -1.571829000 |
| H  | -3.427287000 | 0.814981000  | 0.228745000  |
| C  | -3.670497000 | -0.686145000 | -2.812448000 |
| H  | -2.040525000 | -0.938703000 | -4.198969000 |
| H  | -5.088555000 | -0.272877000 | -1.245405000 |
| H  | -4.401664000 | -1.161364000 | -3.459131000 |
| H  | 1.320842000  | -3.458661000 | -0.658822000 |
| C  | 3.466619000  | 0.197098000  | 1.210134000  |
| H  | 4.321726000  | 0.692519000  | 0.742232000  |
| H  | 2.921279000  | 0.932172000  | 1.802514000  |
| C  | 3.990047000  | -2.630355000 | -0.057494000 |
| O  | 3.988373000  | -3.830517000 | 0.003402000  |
| O  | 5.164144000  | -1.935412000 | 0.048172000  |
| C  | 5.503304000  | -1.048025000 | -1.008876000 |
| H  | 4.646871000  | -0.444689000 | -1.327317000 |
| H  | 6.294509000  | -0.399107000 | -0.631295000 |
| H  | 5.880564000  | -1.615789000 | -1.865191000 |
| H  | 3.876865000  | -0.547156000 | 1.895929000  |
| H  | 3.919257000  | 4.140731000  | 0.095716000  |
| Cl | -3.254295000 | -1.194912000 | 3.272118000  |

**3u**,  $E(\text{SCRF}) = -1853.76877123$  a.u.

|   |              |              |              |
|---|--------------|--------------|--------------|
| C | -0.694022000 | -2.769449000 | -0.702757000 |
| C | 1.451785000  | -2.458789000 | 0.377241000  |
| C | 1.602125000  | -3.808568000 | 0.441330000  |
| C | 0.614036000  | -4.690764000 | -0.084535000 |
| C | -0.517702000 | -4.170784000 | -0.644110000 |
| C | -1.708621000 | -1.928854000 | -1.170353000 |
| C | -1.293184000 | -0.583114000 | -0.978786000 |
| C | -0.039395000 | -0.633799000 | -0.396545000 |
| H | 2.162478000  | -1.741433000 | 0.768847000  |
| H | 0.775558000  | -5.760500000 | -0.025066000 |
| H | -1.300709000 | -4.805161000 | -1.044863000 |
| N | 0.319385000  | -1.952944000 | -0.212403000 |
| C | -2.914404000 | -2.397117000 | -1.757462000 |
| N | -3.893744000 | -2.806564000 | -2.223440000 |
| C | -2.056783000 | 0.648685000  | -1.226346000 |
| C | -3.427358000 | 0.685496000  | -0.951371000 |

|    |              |              |              |
|----|--------------|--------------|--------------|
| C  | -1.409384000 | 1.813197000  | -1.657225000 |
| C  | -4.138100000 | 1.871526000  | -1.101254000 |
| H  | -3.929575000 | -0.208427000 | -0.593913000 |
| C  | -2.123805000 | 2.996190000  | -1.804008000 |
| H  | -0.344207000 | 1.789890000  | -1.874802000 |
| C  | -3.488626000 | 3.028739000  | -1.522981000 |
| H  | -5.199972000 | 1.892292000  | -0.877498000 |
| H  | -1.613482000 | 3.894216000  | -2.137885000 |
| H  | -4.044359000 | 3.954596000  | -1.635303000 |
| N  | 0.755887000  | 0.402987000  | 0.104881000  |
| C  | 0.314727000  | 1.342780000  | 1.046615000  |
| C  | 1.959292000  | 0.811174000  | -0.444746000 |
| C  | 1.261294000  | 2.326265000  | 1.103849000  |
| C  | 2.298728000  | 1.993053000  | 0.184179000  |
| H  | 1.252915000  | 3.191198000  | 1.751577000  |
| C  | -0.983548000 | 1.222853000  | 1.724500000  |
| C  | -1.436612000 | 0.005169000  | 2.245496000  |
| C  | -1.806701000 | 2.350311000  | 1.816055000  |
| C  | -2.695295000 | -0.084816000 | 2.829066000  |
| H  | -0.797591000 | -0.873412000 | 2.197926000  |
| C  | -3.059483000 | 2.261277000  | 2.412639000  |
| H  | -1.469721000 | 3.285691000  | 1.379012000  |
| C  | -3.510633000 | 1.042215000  | 2.912665000  |
| H  | -3.037833000 | -1.035626000 | 3.225418000  |
| H  | -3.692837000 | 3.141308000  | 2.466768000  |
| H  | -4.494148000 | 0.969006000  | 3.366233000  |
| C  | 2.625349000  | 0.026659000  | -1.528879000 |
| H  | 3.122308000  | 0.703489000  | -2.223432000 |
| H  | 3.392721000  | -0.648145000 | -1.132033000 |
| H  | 1.892224000  | -0.572193000 | -2.077766000 |
| C  | 3.500924000  | 2.815640000  | 0.002960000  |
| O  | 3.695045000  | 3.871623000  | 0.558181000  |
| O  | 4.387704000  | 2.265532000  | -0.854916000 |
| C  | 5.569921000  | 3.037005000  | -1.057710000 |
| H  | 6.102218000  | 3.173042000  | -0.113908000 |
| H  | 6.176517000  | 2.470592000  | -1.762922000 |
| H  | 5.320537000  | 4.019060000  | -1.465363000 |
| Cl | 3.025125000  | -4.467891000 | 1.182025000  |

57

**3ab**,  $E(\text{SCRF}) = -1433.47496555$  a.u.

|   |              |             |              |
|---|--------------|-------------|--------------|
| C | 1.922176000  | 2.519517000 | -0.331424000 |
| C | 0.013618000  | 3.045239000 | 1.057648000  |
| C | 0.523723000  | 4.281550000 | 1.301657000  |
| C | 1.753992000  | 4.681625000 | 0.701498000  |
| C | 2.443916000  | 3.813091000 | -0.096550000 |
| C | 2.368176000  | 1.396960000 | -1.036572000 |
| C | 1.381775000  | 0.378721000 | -0.918880000 |
| C | 0.358238000  | 0.905558000 | -0.153763000 |
| H | -0.902120000 | 2.653943000 | 1.483986000  |



|   |              |              |              |
|---|--------------|--------------|--------------|
| H | 2.143882000  | 5.674903000  | 0.892947000  |
| H | 3.392080000  | 4.073924000  | -0.553955000 |
| N | 0.691543000  | 2.189863000  | 0.224289000  |
| C | 3.593881000  | 1.349618000  | -1.752224000 |
| N | 4.604552000  | 1.333655000  | -2.320353000 |
| C | 1.453927000  | -1.016517000 | -1.378120000 |
| C | 2.670342000  | -1.704783000 | -1.318956000 |
| C | 0.299846000  | -1.696856000 | -1.786144000 |
| C | 2.728987000  | -3.052523000 | -1.656314000 |
| H | 3.564442000  | -1.189938000 | -0.980677000 |
| C | 0.363274000  | -3.044356000 | -2.121074000 |
| H | -0.649268000 | -1.168874000 | -1.839342000 |
| C | 1.576825000  | -3.726312000 | -2.053419000 |
| H | 3.676560000  | -3.578774000 | -1.598700000 |
| H | -0.537649000 | -3.562540000 | -2.434590000 |
| H | 1.623716000  | -4.779649000 | -2.312259000 |
| N | -0.789779000 | 0.276534000  | 0.348497000  |
| C | -0.742764000 | -0.869424000 | 1.153633000  |
| C | -2.074274000 | 0.461583000  | -0.137971000 |
| C | -2.008333000 | -1.380659000 | 1.201847000  |
| C | -2.846960000 | -0.550853000 | 0.401526000  |
| H | -2.333016000 | -2.248865000 | 1.757304000  |
| C | 0.519194000  | -1.386132000 | 1.701144000  |
| C | 1.472710000  | -0.545180000 | 2.286496000  |
| C | 0.794364000  | -2.753412000 | 1.590222000  |
| C | 2.681836000  | -1.061309000 | 2.738950000  |
| H | 1.263607000  | 0.516806000  | 2.392029000  |
| C | 1.999187000  | -3.269398000 | 2.054439000  |
| H | 0.071515000  | -3.397934000 | 1.098584000  |
| C | 2.948558000  | -2.424154000 | 2.623556000  |
| H | 3.415622000  | -0.398573000 | 3.187024000  |
| H | 2.204916000  | -4.330332000 | 1.951399000  |
| H | 3.894841000  | -2.824176000 | 2.974229000  |
| C | -4.273818000 | -0.831318000 | 0.202216000  |
| O | -4.869172000 | -1.745279000 | 0.723316000  |
| O | -4.869101000 | 0.035255000  | -0.647907000 |
| C | -6.253906000 | -0.216674000 | -0.877046000 |
| H | -6.811483000 | -0.165712000 | 0.060596000  |
| H | -6.586243000 | 0.559224000  | -1.565350000 |
| H | -6.393808000 | -1.206923000 | -1.315791000 |
| H | -0.013930000 | 4.951107000  | 1.961700000  |
| C | -2.410169000 | 1.565684000  | -1.096706000 |
| H | -2.980213000 | 1.130661000  | -1.922367000 |
| H | -1.481028000 | 1.961584000  | -1.522276000 |
| C | -3.235583000 | 2.703335000  | -0.480741000 |
| H | -2.682798000 | 3.226648000  | 0.303829000  |
| H | -3.494353000 | 3.437061000  | -1.249364000 |
| H | -4.159741000 | 2.310525000  | -0.052841000 |

54

**3ah**,  $E(\text{SCRF}) = -1853.77514137$  a.u.

|   |              |              |              |
|---|--------------|--------------|--------------|
| C | -1.464054000 | 2.640412000  | 0.646955000  |
| C | 0.401381000  | 3.125210000  | -0.815608000 |
| C | -0.086982000 | 4.375118000  | -1.031624000 |
| C | -1.284713000 | 4.801063000  | -0.385513000 |
| C | -1.962955000 | 3.946934000  | 0.437276000  |
| C | -1.903699000 | 1.532166000  | 1.378527000  |
| C | -0.950776000 | 0.488986000  | 1.219097000  |
| C | 0.043428000  | 0.983559000  | 0.395736000  |
| H | 1.296398000  | 2.720873000  | -1.273250000 |
| H | -1.657496000 | 5.804149000  | -0.558725000 |
| H | -2.884702000 | 4.229028000  | 0.934225000  |
| N | -0.271075000 | 2.277725000  | 0.032131000  |
| C | -3.088401000 | 1.519257000  | 2.161799000  |
| N | -4.062996000 | 1.530028000  | 2.789647000  |
| C | -1.028790000 | -0.896084000 | 1.706888000  |
| C | -2.258543000 | -1.562650000 | 1.715939000  |
| C | 0.130171000  | -1.586675000 | 2.082601000  |
| C | -2.325389000 | -2.900588000 | 2.090221000  |
| H | -3.158055000 | -1.038456000 | 1.406514000  |
| C | 0.058406000  | -2.924105000 | 2.453698000  |
| H | 1.088560000  | -1.072952000 | 2.081891000  |
| C | -1.168770000 | -3.585076000 | 2.454766000  |
| H | -3.283633000 | -3.410448000 | 2.087686000  |
| H | 0.962468000  | -3.450725000 | 2.743250000  |
| H | -1.222794000 | -4.630345000 | 2.743223000  |
| N | 1.140272000  | 0.323704000  | -0.174436000 |
| C | 1.042562000  | -0.846760000 | -0.936984000 |
| C | 2.463231000  | 0.570784000  | 0.142866000  |
| C | 2.312765000  | -1.317096000 | -1.118642000 |
| C | 3.207898000  | -0.426539000 | -0.458058000 |
| H | 2.603002000  | -2.189221000 | -1.686971000 |
| C | -0.250711000 | -1.416477000 | -1.337470000 |
| C | -1.286205000 | -0.608752000 | -1.820145000 |
| C | -0.464088000 | -2.790894000 | -1.190205000 |
| C | -2.514013000 | -1.181841000 | -2.120677000 |
| H | -1.142166000 | 0.458070000  | -1.962328000 |
| C | -1.695445000 | -3.348376000 | -1.514440000 |
| H | 0.329387000  | -3.407110000 | -0.779480000 |
| C | -2.736643000 | -2.547139000 | -1.974164000 |
| H | -1.856950000 | -4.413766000 | -1.385353000 |
| H | -3.707704000 | -2.965690000 | -2.213955000 |
| C | 4.664685000  | -0.605537000 | -0.469390000 |
| O | 5.232408000  | -1.544083000 | -0.977376000 |
| O | 5.321574000  | 0.400408000  | 0.148114000  |
| C | 6.740653000  | 0.258524000  | 0.161041000  |
| H | 7.129049000  | 0.222725000  | -0.858992000 |
| H | 7.121497000  | 1.132827000  | 0.687003000  |
| H | 7.028492000  | -0.658849000 | 0.679095000  |

|    |              |              |              |
|----|--------------|--------------|--------------|
| H  | 0.444598000  | 5.037651000  | -1.703514000 |
| C  | 2.850378000  | 1.723760000  | 1.011351000  |
| H  | 3.703770000  | 1.450340000  | 1.631310000  |
| H  | 2.016900000  | 2.014869000  | 1.657661000  |
| H  | 3.147104000  | 2.597547000  | 0.419883000  |
| Cl | -3.806193000 | -0.160495000 | -2.697736000 |

## 11. Proposed reaction pathway

On the basis of previous related studies, a proposed mechanism of this transformation was illustrated. The condensation of 3-aminoindolizine **1a** with 1,4-diketone **2a** in the presence of CPA catalyst gave rise to iminoketone intermediate **INT A**, which subsequently tautomerized into its enaminate type **INT B**. Dual H-bond activation of CPA with **INT B**, which was concerned as the enantio-determining step, resulted in the dehydrative cyclization and the generation of **INT C**. Finally, deprotonation and aromatisation of **INT C** promoted the formation of the desired product **3**.

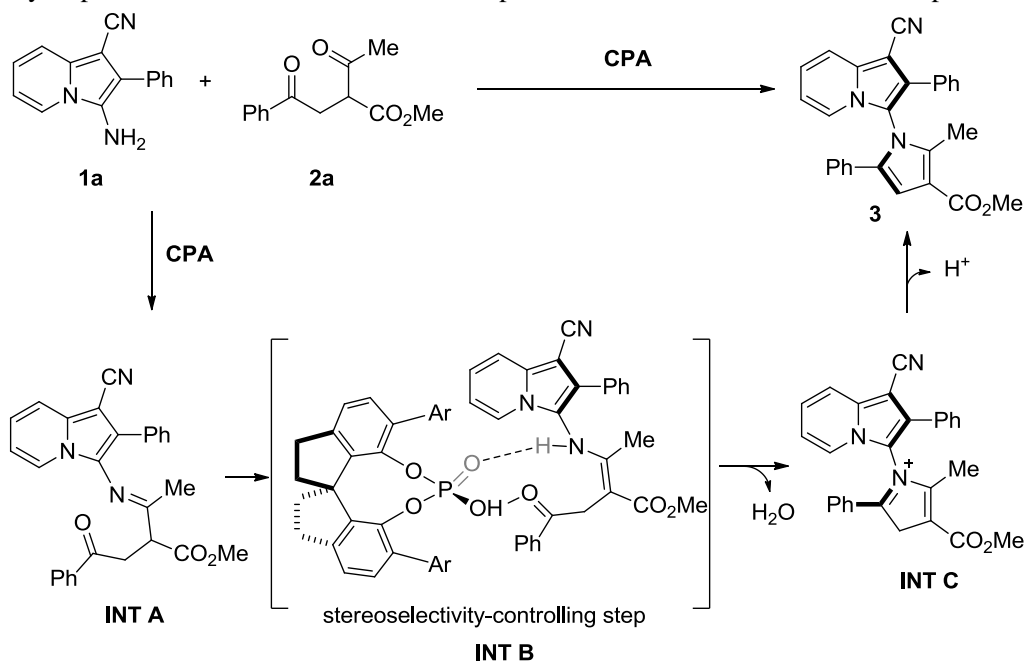

## 12. Copies of NMR spectra and HPLC measurements of the products

$^1\text{H}$  NMR of **3a** (400 MHz,  $\text{CDCl}_3$ )

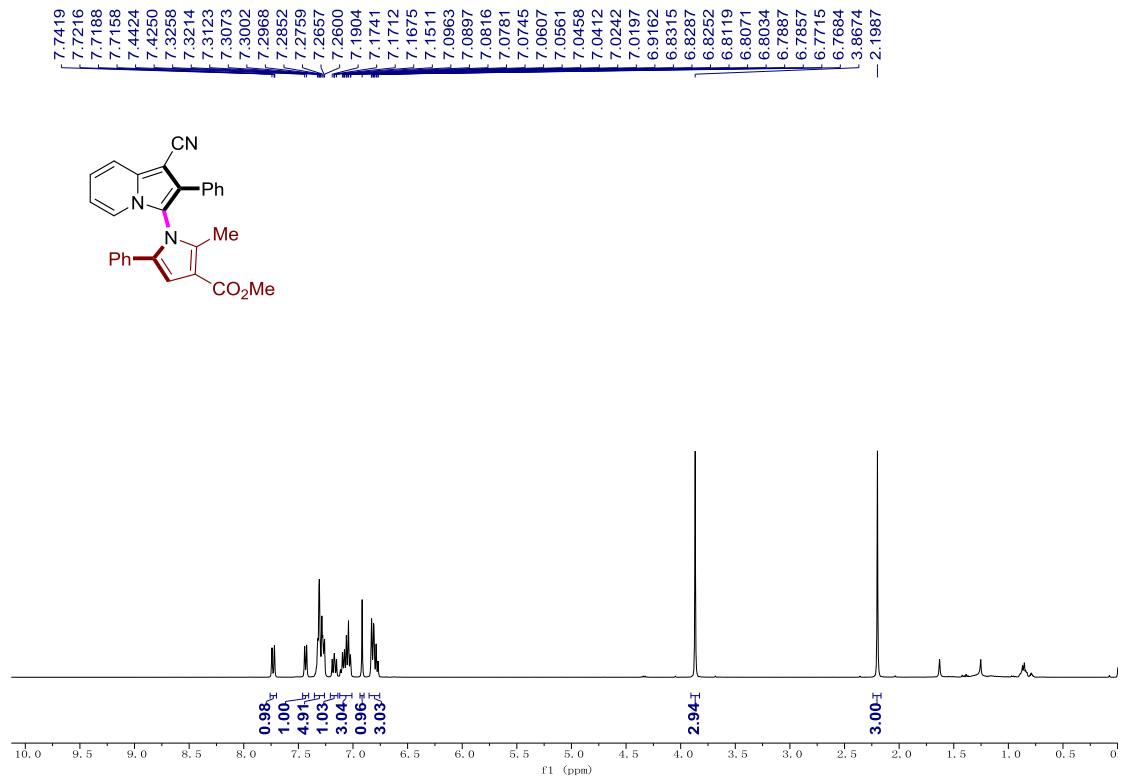

$^{13}\text{C}$  NMR of **3a** (100 MHz,  $\text{CDCl}_3$ )

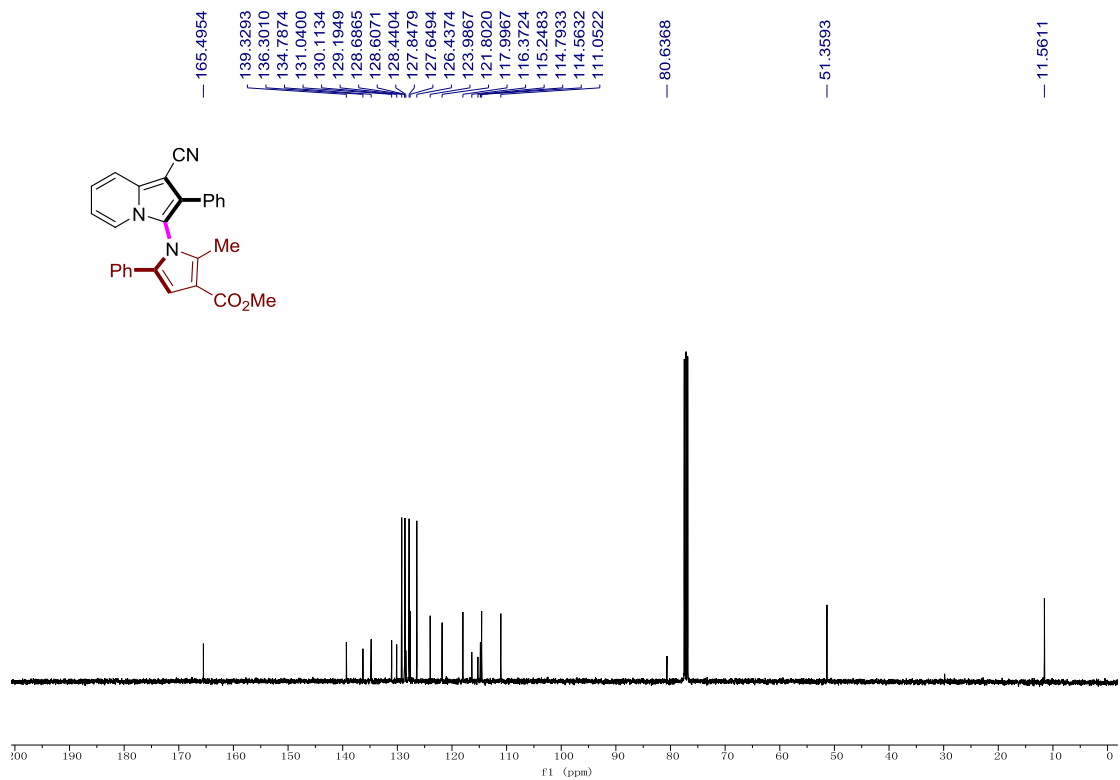

### HPLC analysis: rac-3a

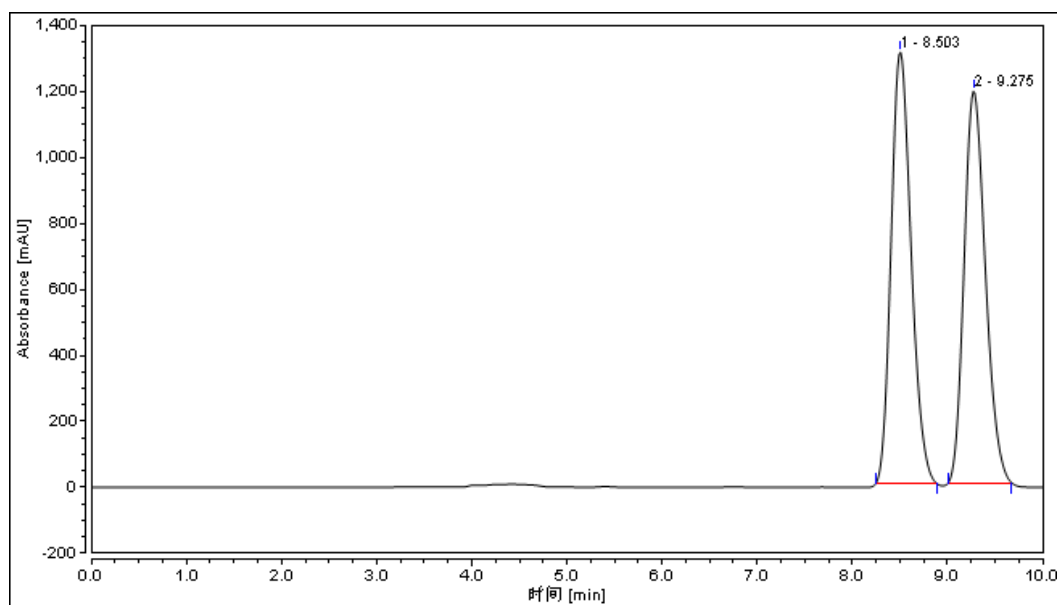

| Peak | RetTime<br>min | Area<br>mAU*min | Height<br>mAU | Area<br>% |
|------|----------------|-----------------|---------------|-----------|
| 1    | 8.503          | 319.500         | 1310.031      | 50.90     |
| 2    | 9.275          | 308.257         | 1188.979      | 49.10     |

### Enantioenriched 3a

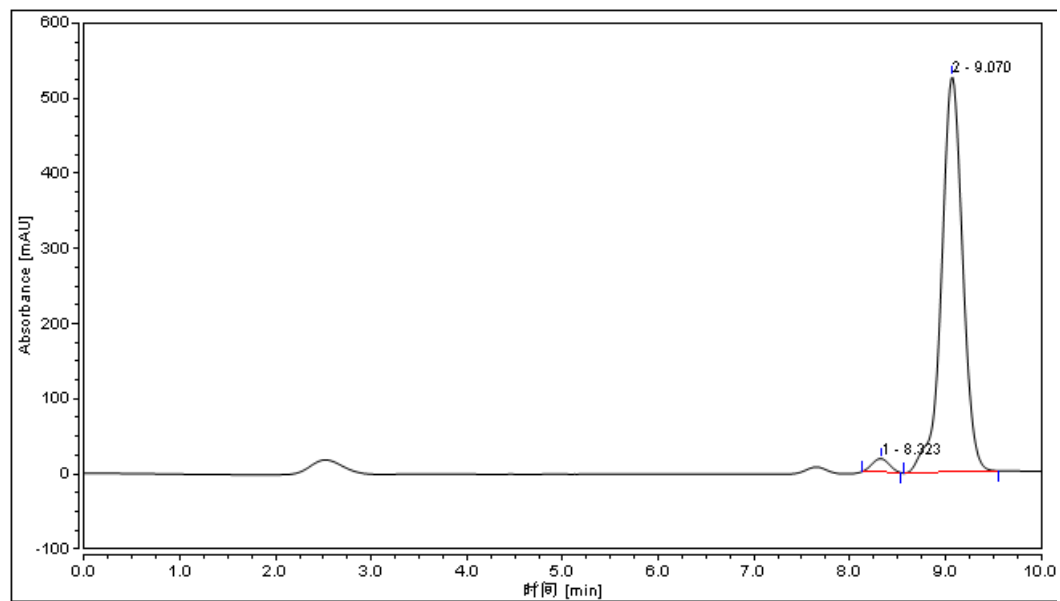

| Peak | RetTime<br>min | Area<br>mAU*min | Height<br>mAU | Area<br>% |
|------|----------------|-----------------|---------------|-----------|
| 1    | 8.320          | 3.436           | 16.978        | 2.59      |
| 2    | 9.070          | 129.242         | 505.340       | 97.41     |

<sup>1</sup>H NMR of **3b** (400 MHz, CDCl<sub>3</sub>)

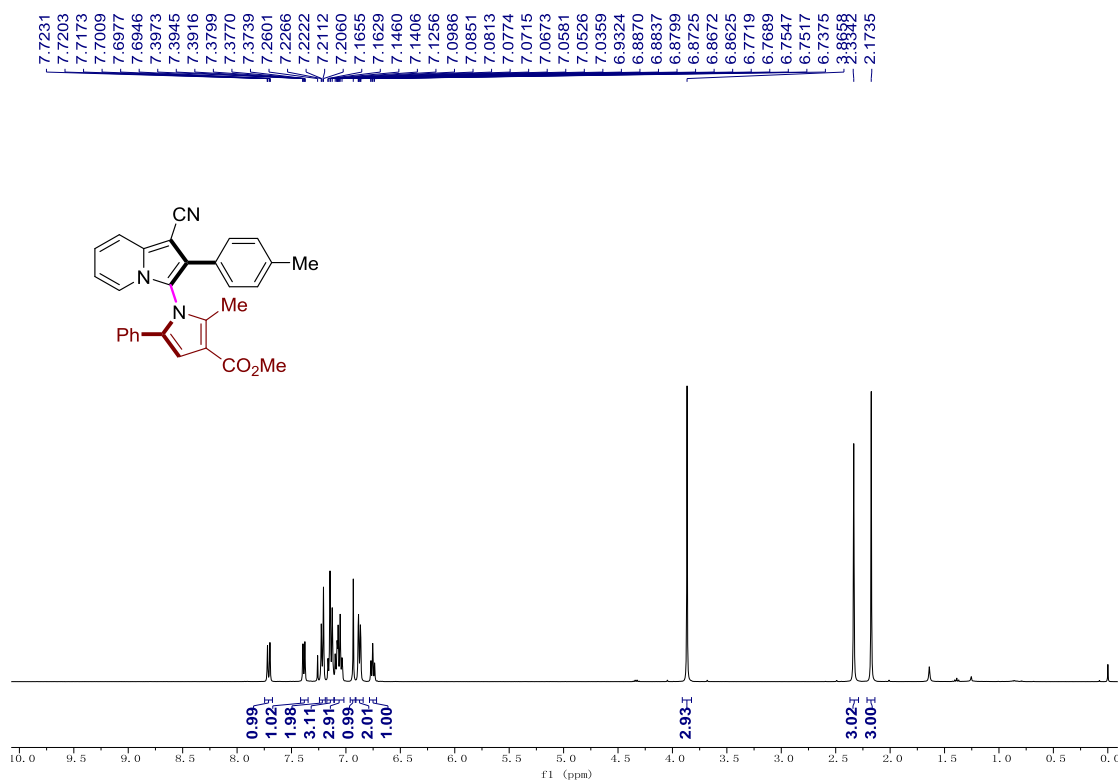

<sup>13</sup>C NMR of **3b** (100 MHz, CDCl<sub>3</sub>)

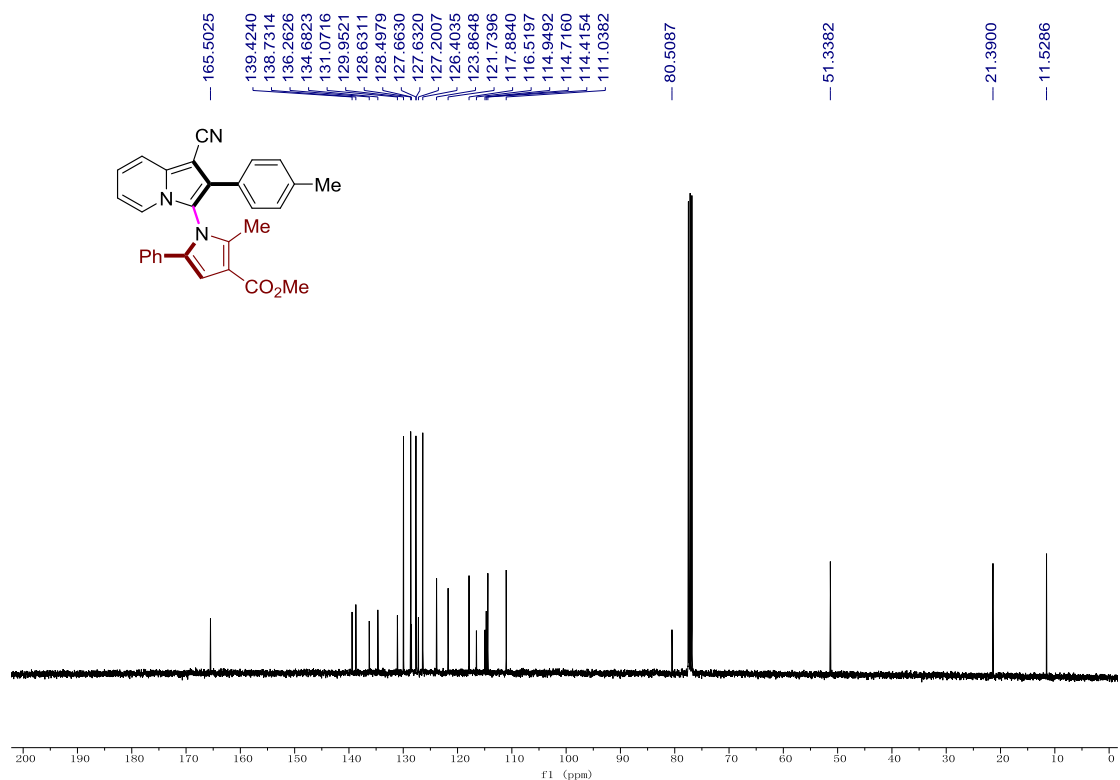

### HPLC analysis: rac-3b

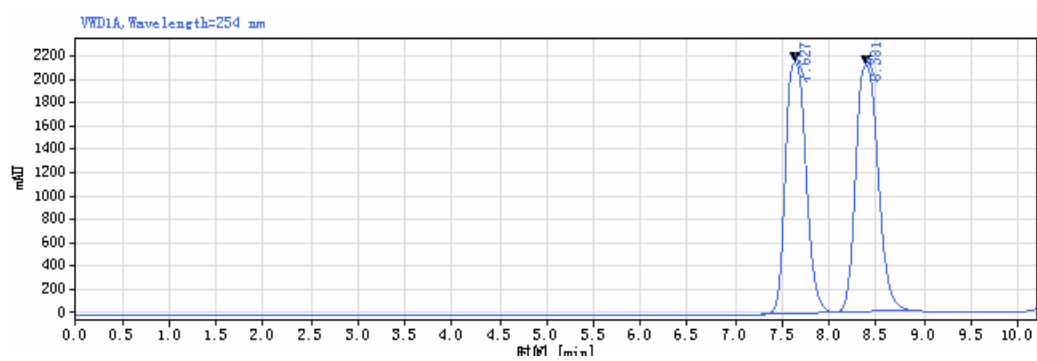

| Peak | RetTime<br>min | Area<br>mAU*min | Height<br>mAU | Area<br>% |
|------|----------------|-----------------|---------------|-----------|
| 1    | 7.627          | 32450.56        | 2145.33       | 48.39     |
| 2    | 8.381          | 34609.57        | 2106          | 51.61     |

### Enantioenriched 3b

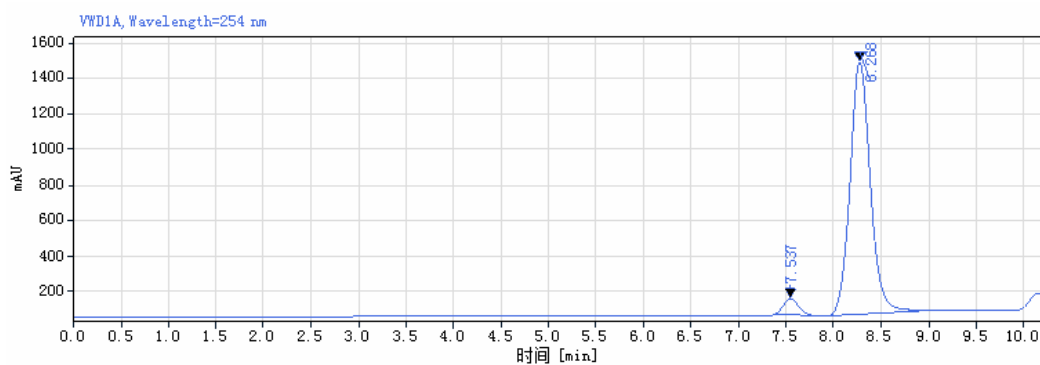

| Peak | RetTime<br>min | Area<br>mAU*min | Height<br>mAU | Area<br>% |
|------|----------------|-----------------|---------------|-----------|
| 1    | 7.537          | 975.87          | 87.95         | 4.43      |
| 2    | 8.268          | 21075           | 1415.45       | 95.57     |

<sup>1</sup>H NMR of **3c** (400 MHz, CDCl<sub>3</sub>)

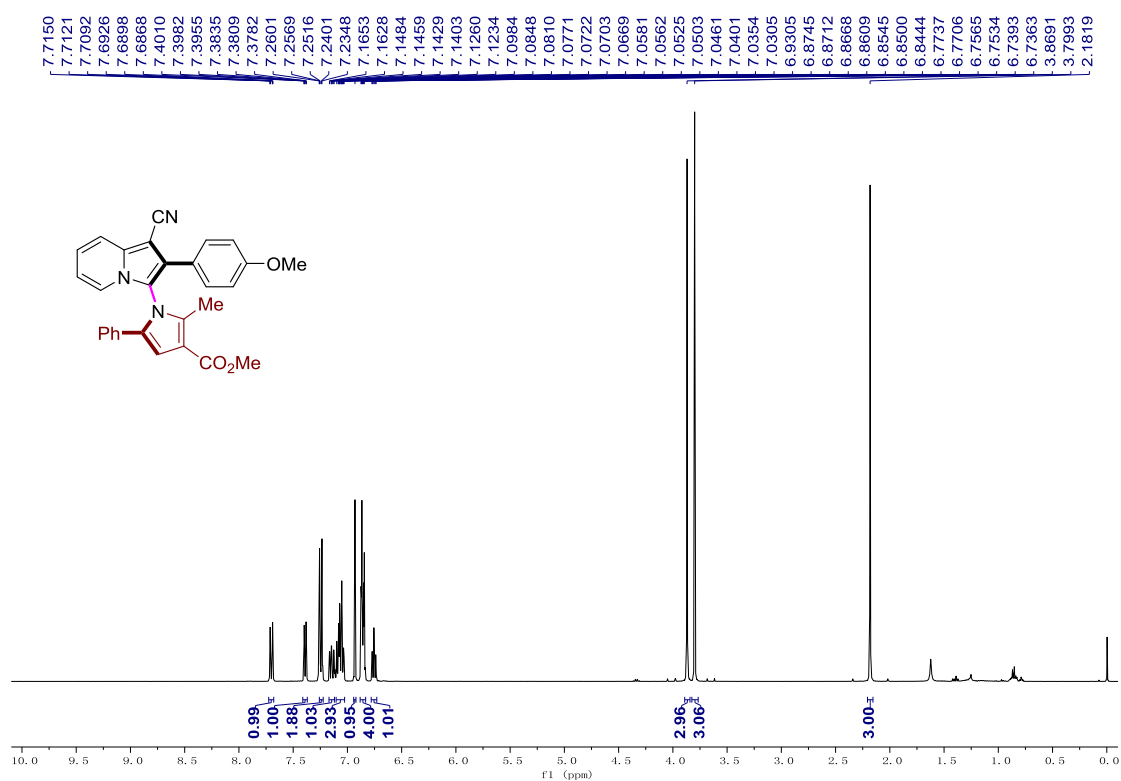

<sup>13</sup>C NMR of **3c** (100 MHz, CDCl<sub>3</sub>)

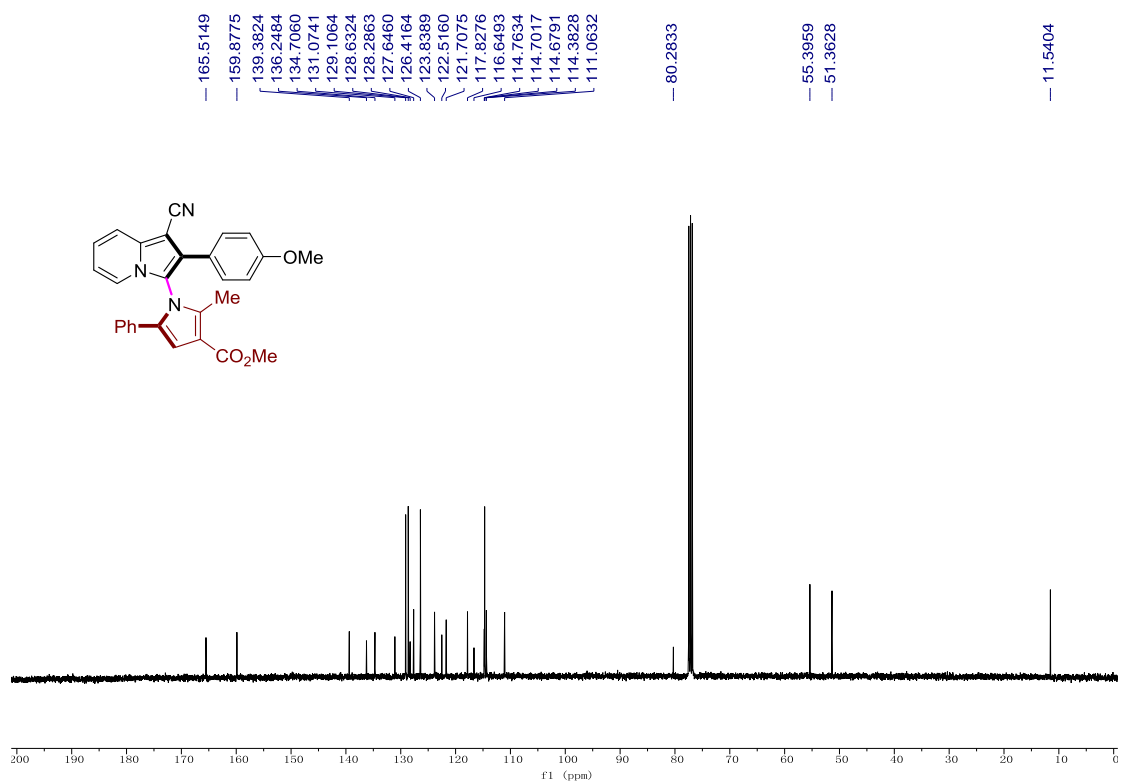



### HPLC analysis: rac-3c

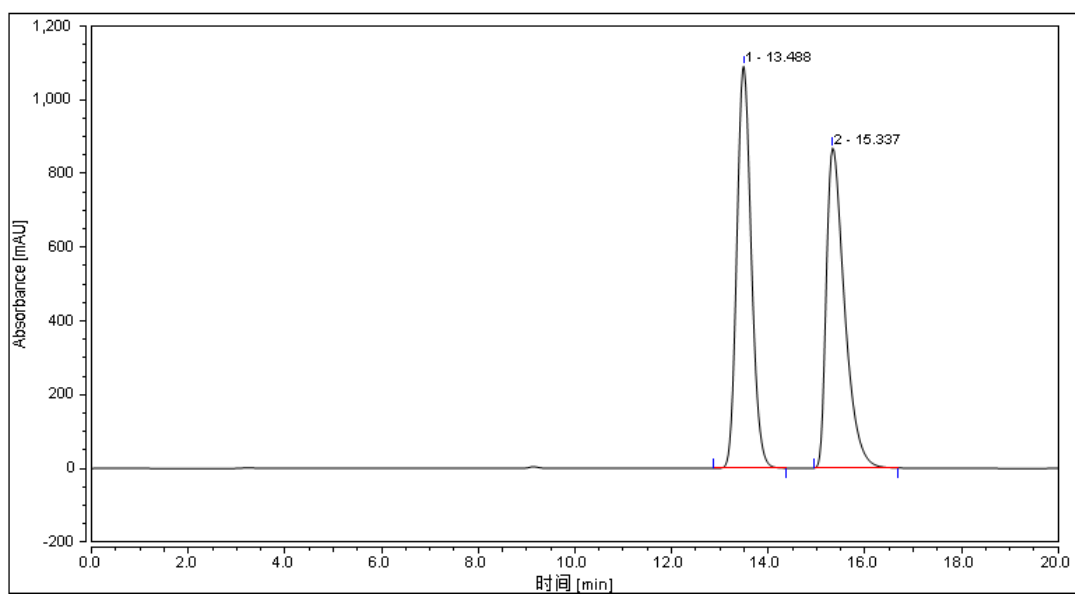

| Peak | RetTime<br>min | Area<br>mAU*min | Height<br>mAU | Area<br>% |
|------|----------------|-----------------|---------------|-----------|
| 1    | 13.488         | 377.253         | 1090.015      | 49.93     |
| 2    | 15.337         | 378.250         | 868.920       | 50.07     |

### Enantioenriched 3c

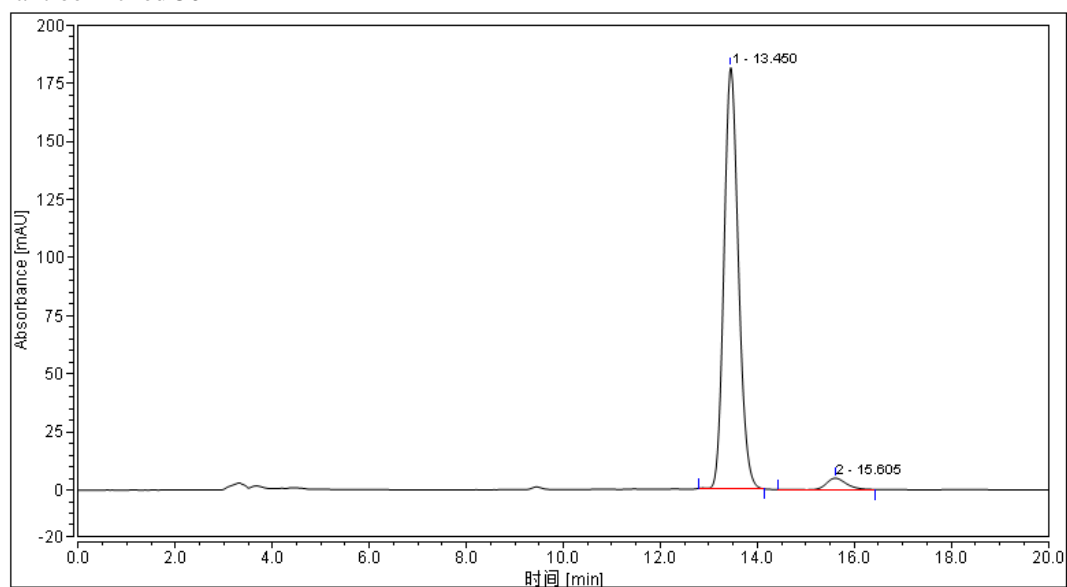

| Peak | RetTime<br>min | Area<br>mAU*min | Height<br>mAU | Area<br>% |
|------|----------------|-----------------|---------------|-----------|
| 1    | 13.450         | 62.347          | 181.160       | 96.51     |
| 2    | 15.605         | 2.255           | 4.919         | 3.49      |

<sup>1</sup>H NMR of **3d** (400 MHz, CDCl<sub>3</sub>)

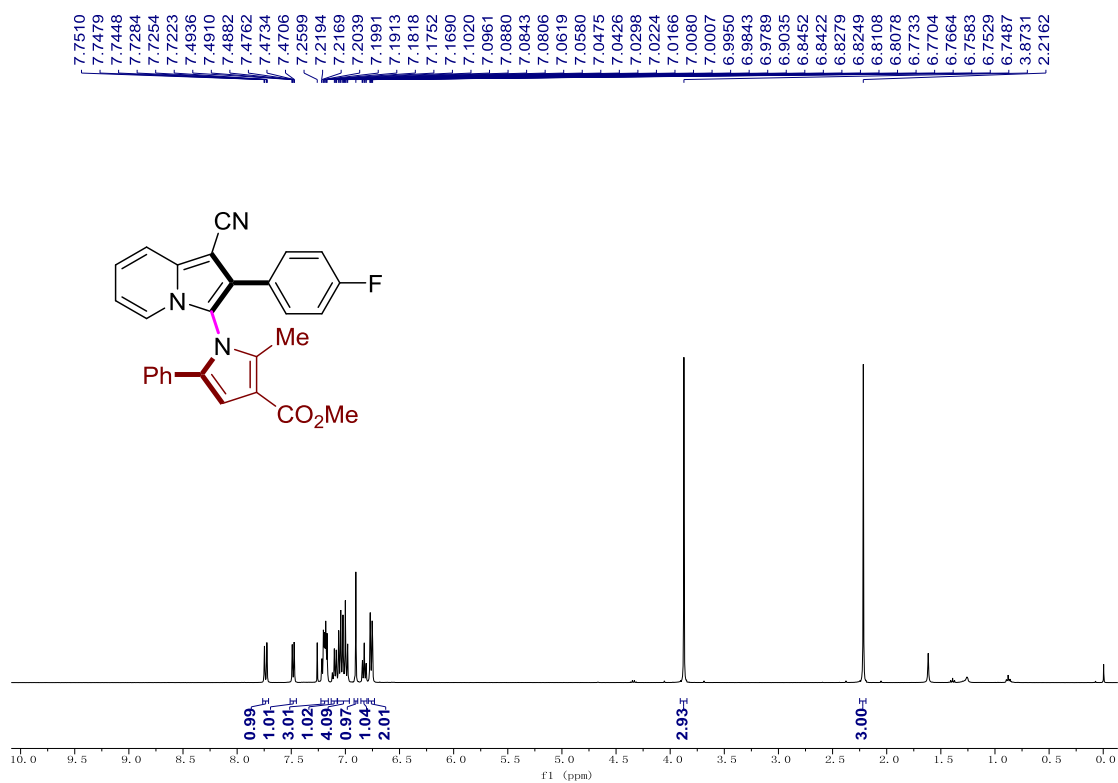

<sup>13</sup>C NMR of **3d** (100 MHz, CDCl<sub>3</sub>)

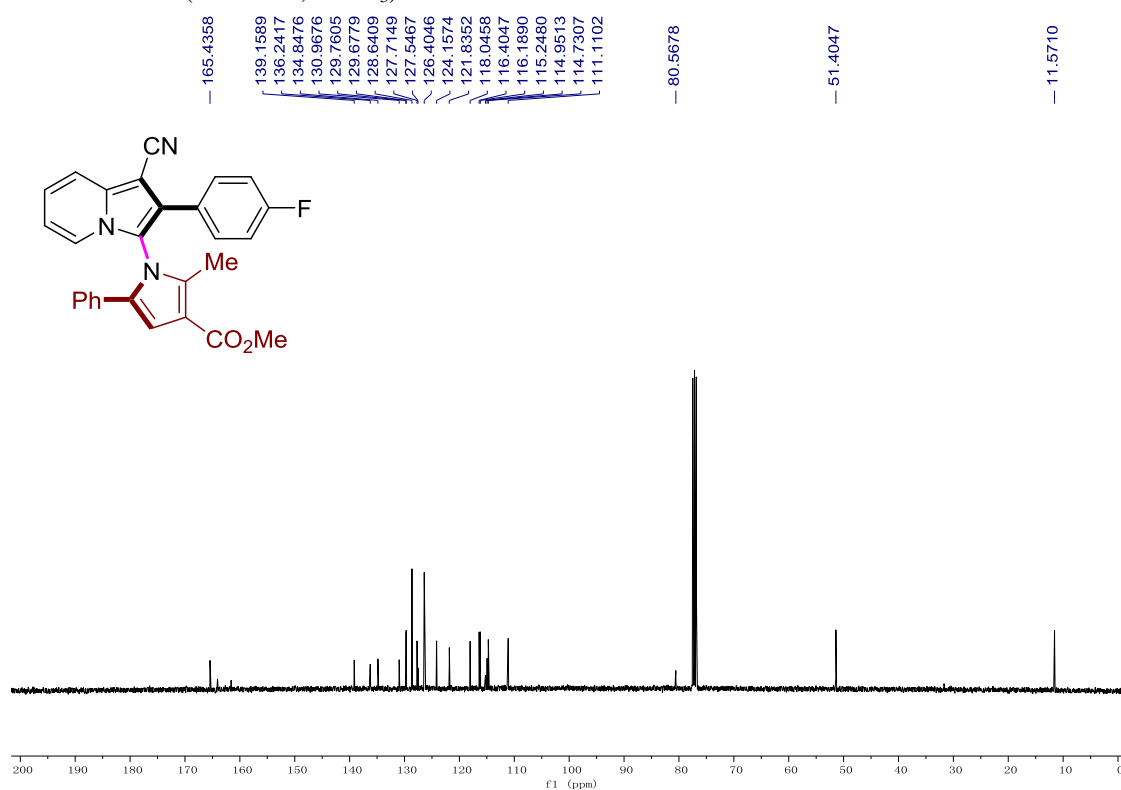

$^{19}\text{F}$  NMR of **3d** (376 MHz,  $\text{CDCl}_3$ )

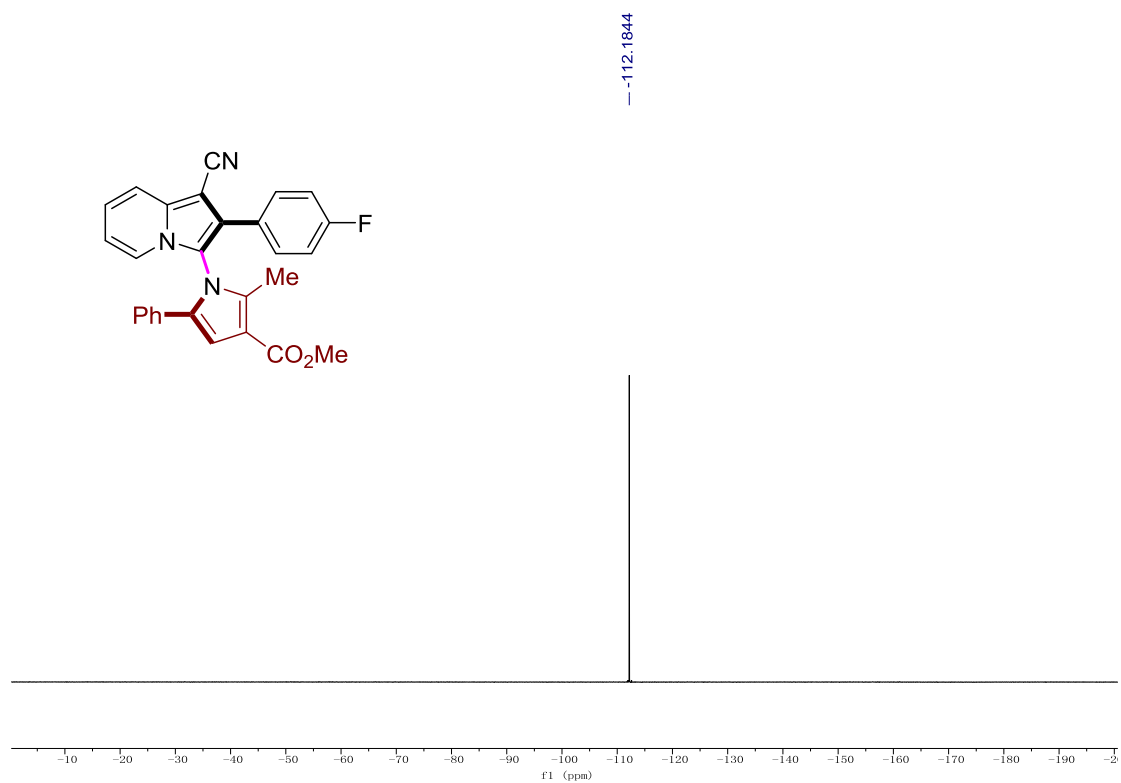

### HPLC analysis:rac-3d

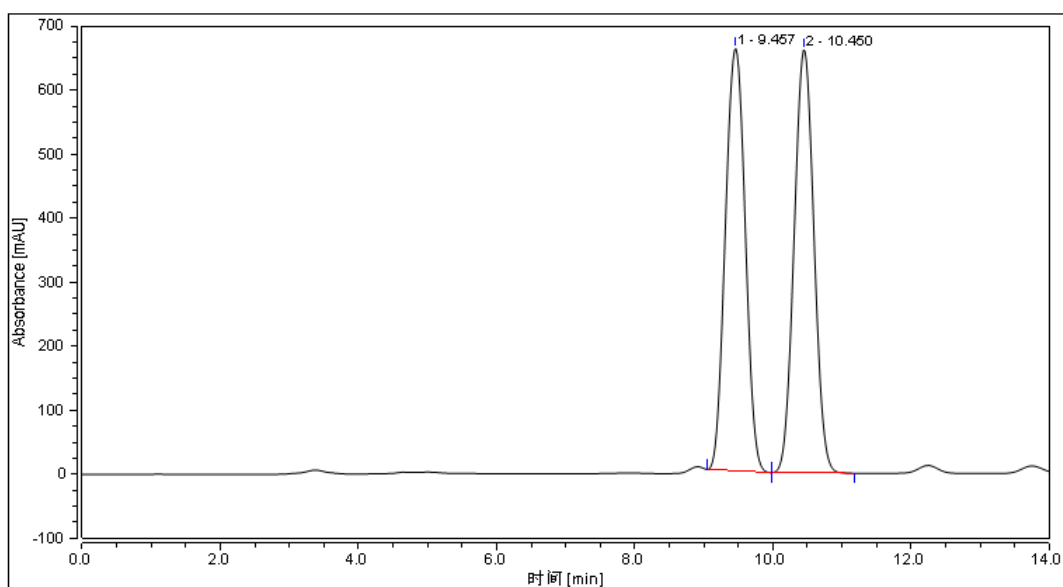

| Peak | RetTime<br>min | Area<br>mAU*min | Height<br>mAU | Area<br>% |
|------|----------------|-----------------|---------------|-----------|
| 1    | 9.457          | 219.440         | 659.988       | 50.02     |
| 2    | 10.450         | 219.264         | 661.486       | 49.98     |

### Enantioenriched 3d

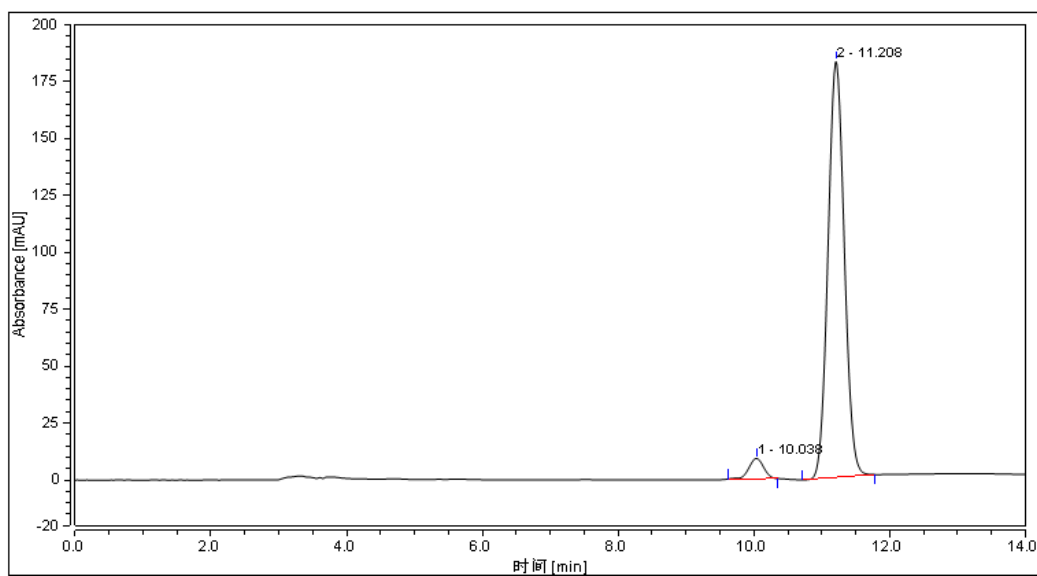

| Peak | RetTime<br>min | Area<br>mAU*min | Height<br>mAU | Area<br>% |
|------|----------------|-----------------|---------------|-----------|
| 1    | 10.038         | 2.224           | 8.935         | 4.20      |
| 2    | 11.208         | 50.688          | 182.511       | 95.80     |

<sup>1</sup>H NMR of **3e** (400 MHz, CDCl<sub>3</sub>)

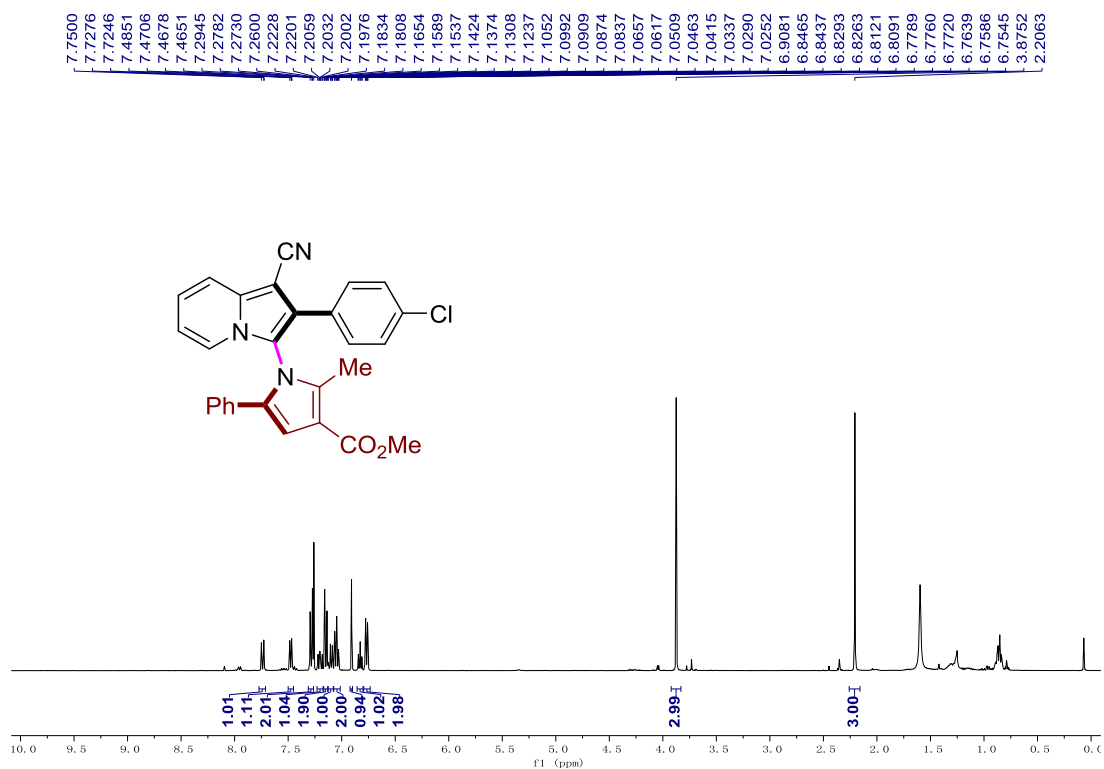

<sup>13</sup>C NMR of **3e** (100 MHz, CDCl<sub>3</sub>)

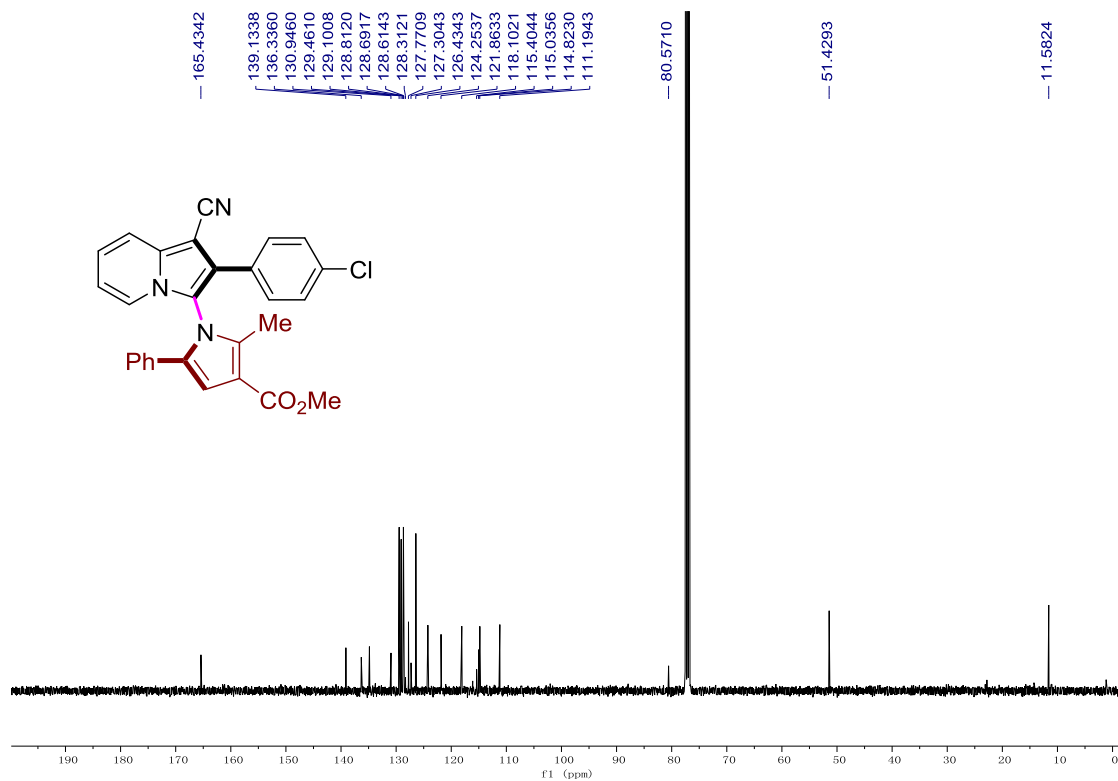

### HPLC analysis: rac-3e

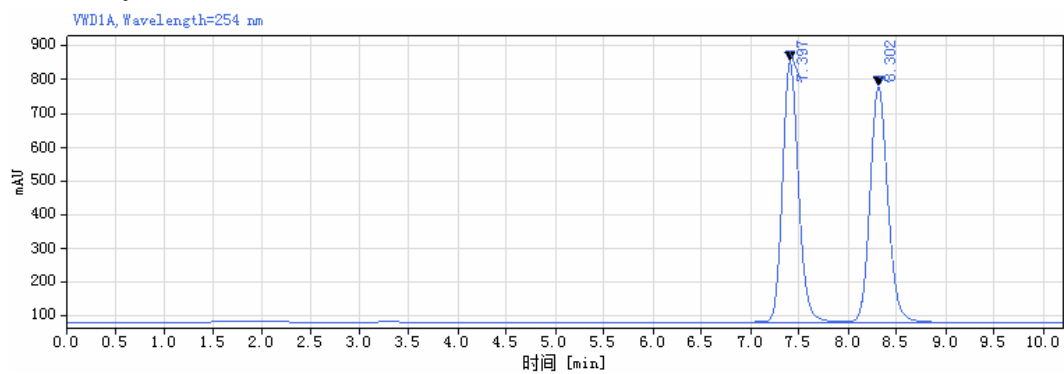

| Peak | RetTime<br>min | Area<br>mAU*min | Height<br>mAU | Area<br>% |
|------|----------------|-----------------|---------------|-----------|
| 1    | 7.397          | 8884.19         | 774.17        | 49.76     |
| 2    | 8.302          | 8968.13         | 699.31        | 50.24     |

### Enantioenriched 3e

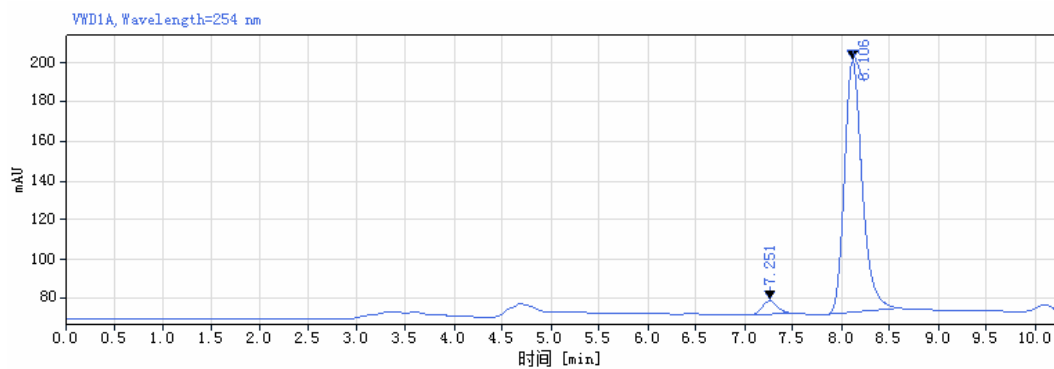

| Peak | RetTime<br>min | Area<br>mAU*min | Height<br>mAU | Area<br>% |
|------|----------------|-----------------|---------------|-----------|
| 1    | 7.251          | 73.39           | 6.67          | 4.29      |
| 2    | 8.106          | 1636.57         | 127.97        | 95.71     |

$^1\text{H}$  NMR of **3f** (400 MHz,  $\text{CDCl}_3$ )

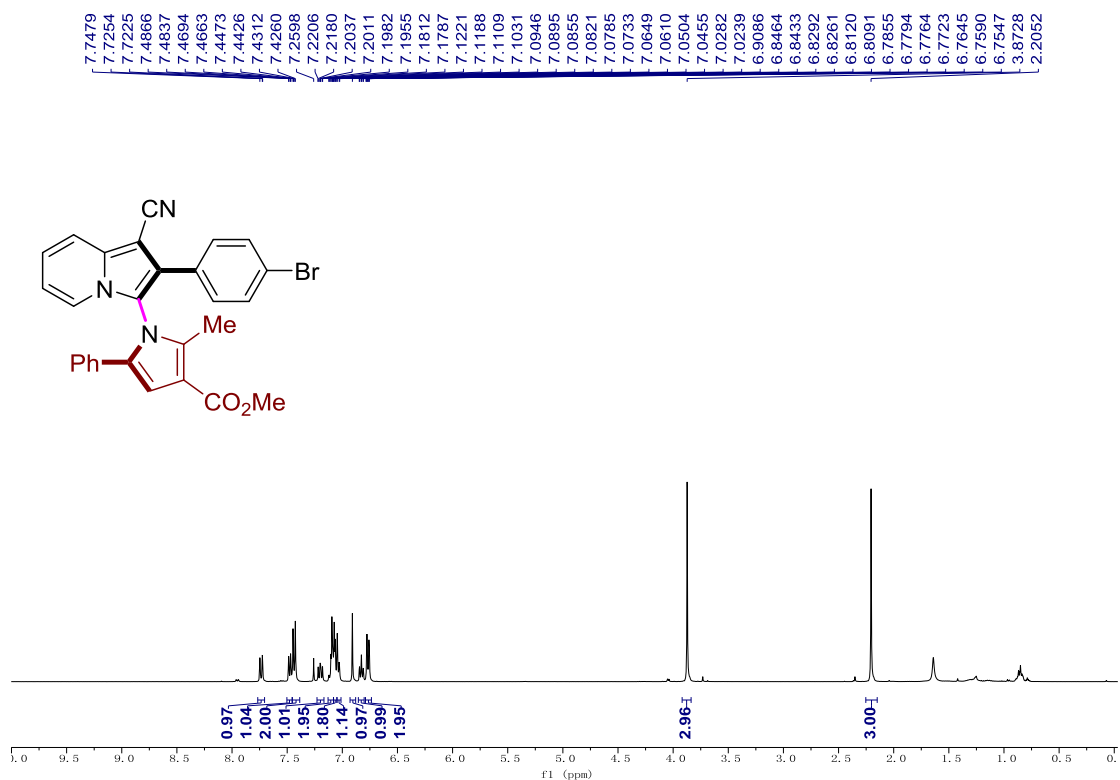

$^{13}\text{C}$  NMR of **3f** (100 MHz,  $\text{CDCl}_3$ )

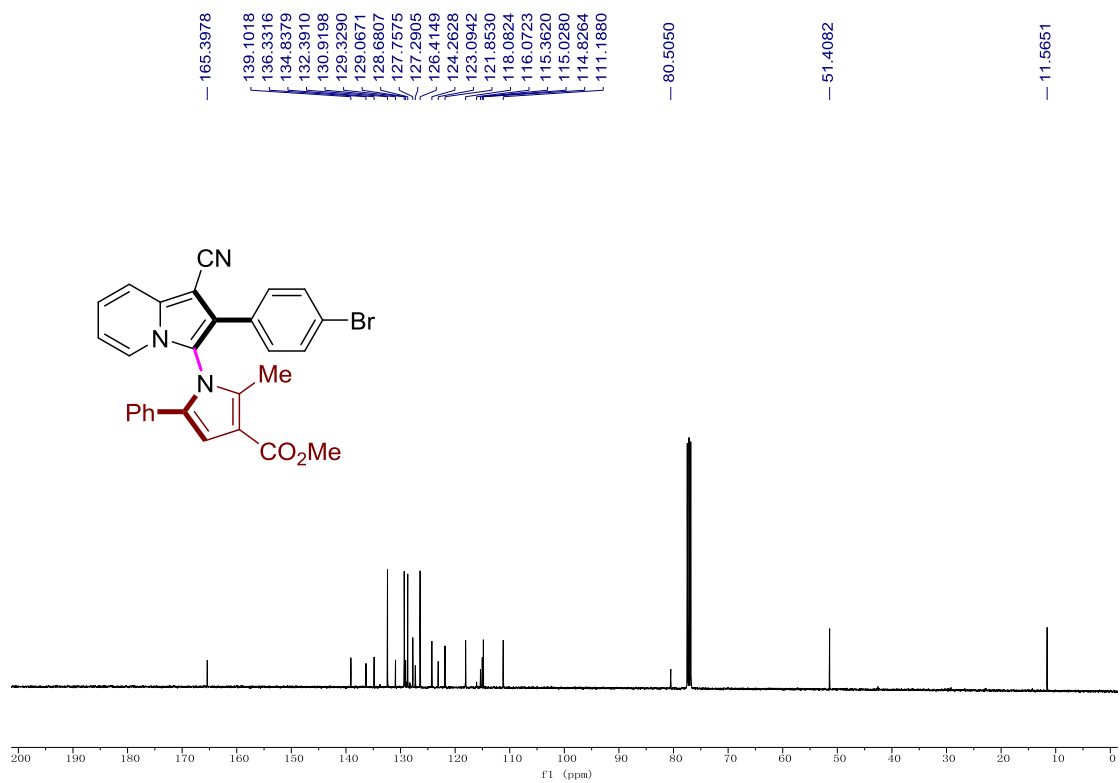

### HPLC analysis: rac-3f

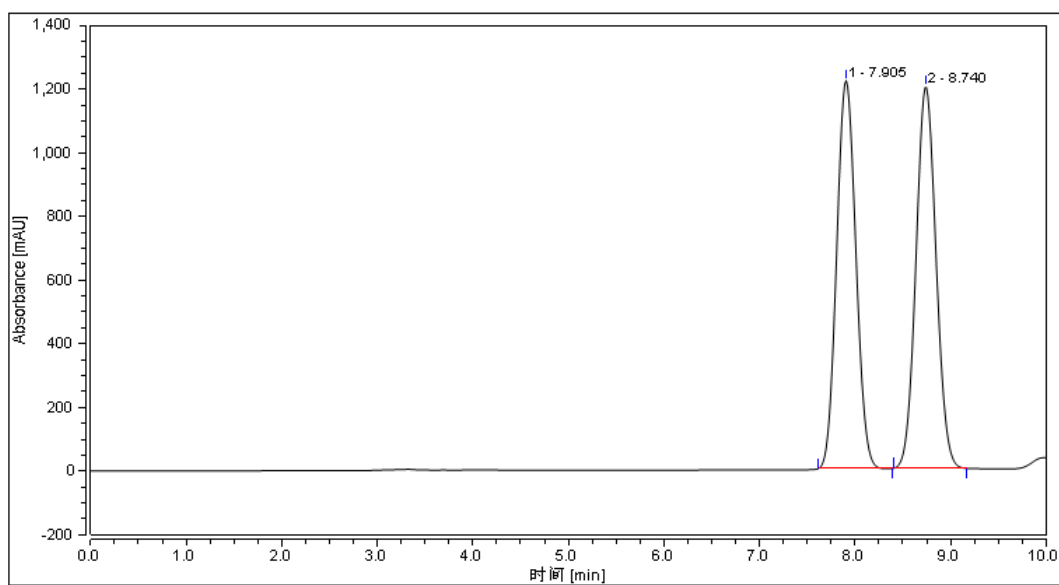

| Peak | RetTime<br>min | Area<br>mAU*min | Height<br>mAU | Area<br>% |
|------|----------------|-----------------|---------------|-----------|
| 1    | 7.905          | 282.902         | 1218.868      | 49.25     |
| 2    | 8.740          | 291.490         | 1198.792      | 50.75     |

### Enantioenriched 3f

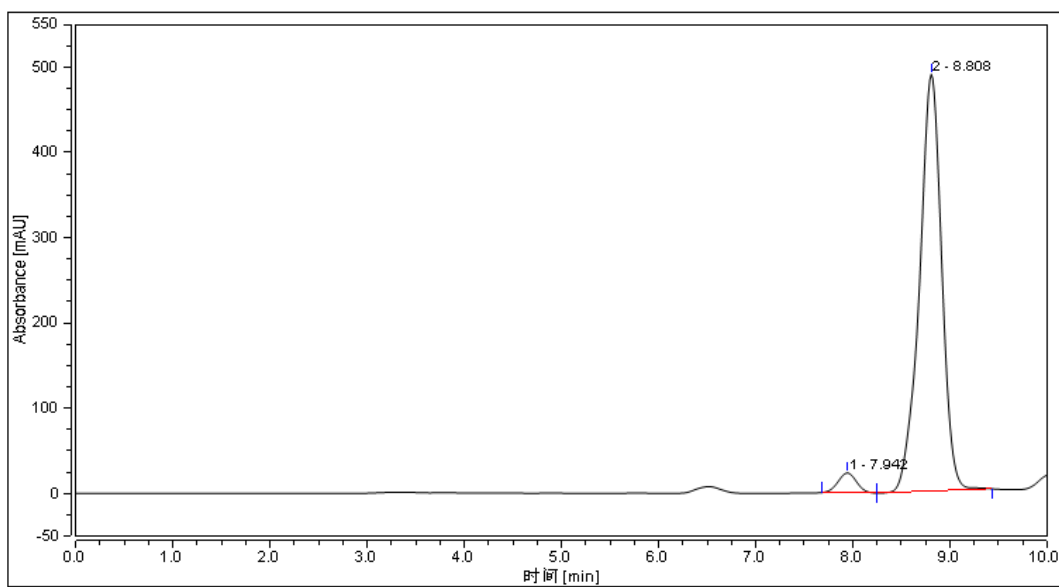

| Peak | RetTime<br>min | Area<br>mAU*min | Height<br>mAU | Area<br>% |
|------|----------------|-----------------|---------------|-----------|
| 1    | 7.942          | 5.103           | 23.219        | 3.80      |
| 2    | 8.808          | 129.361         | 489.101       | 96.20     |



<sup>1</sup>H NMR of **3g** (400 MHz, CDCl<sub>3</sub>)

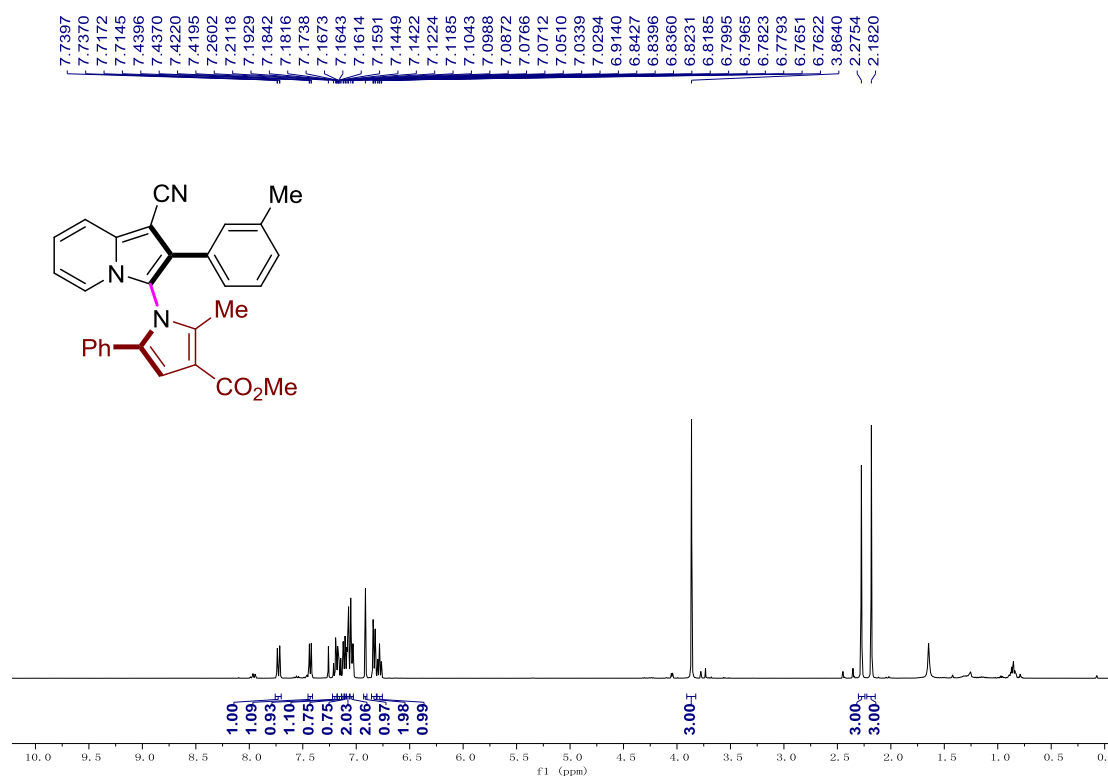

<sup>13</sup>C NMR of **3g** (100 MHz, CDCl<sub>3</sub>)

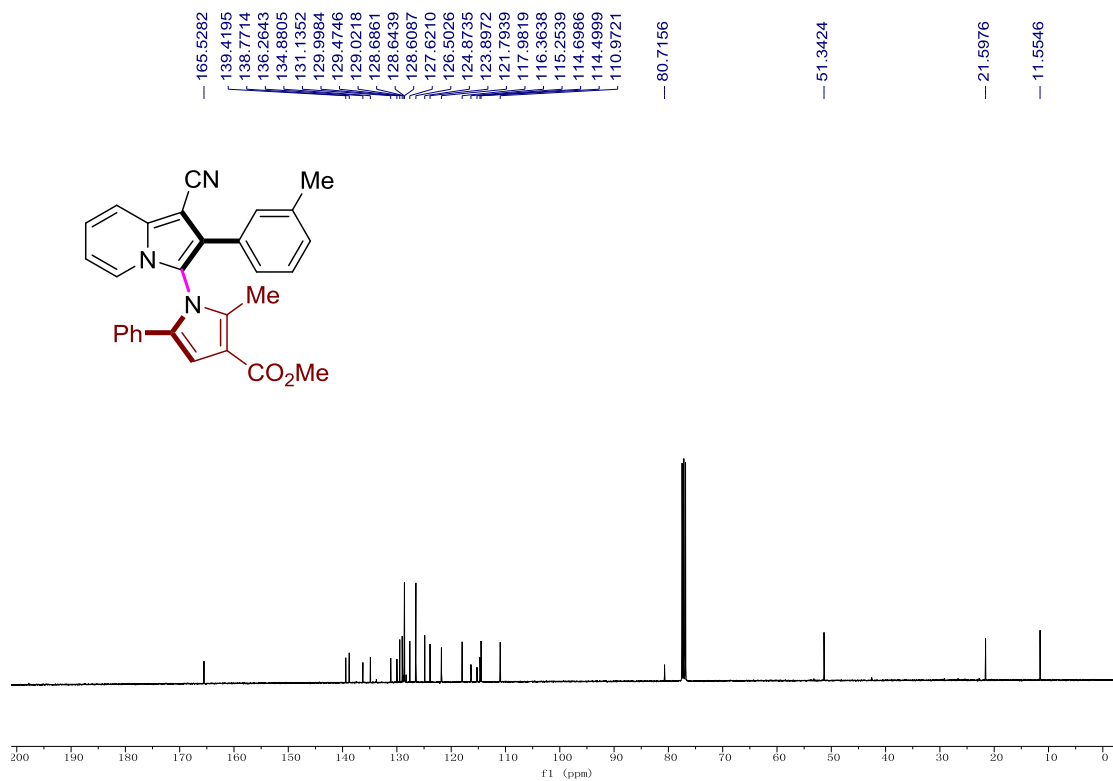

### HPLC analysis: rac-3g

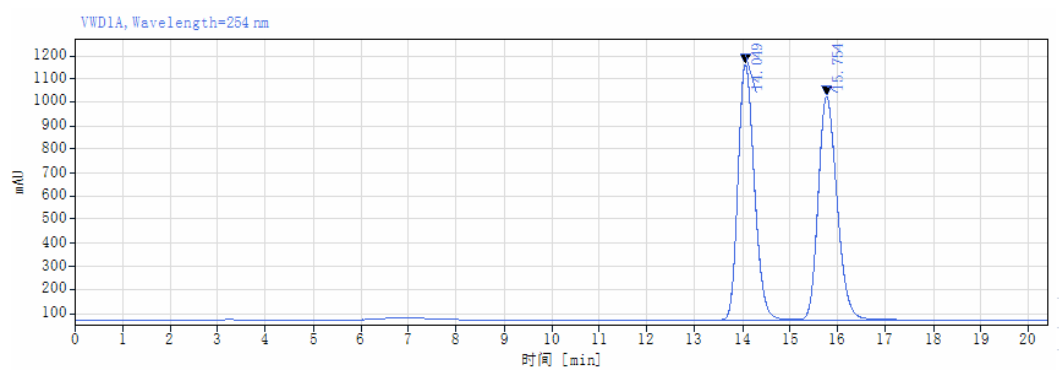

| Peak | RetTime<br>min | Area<br>mAU*min | Height<br>mAU | Area<br>% |
|------|----------------|-----------------|---------------|-----------|
| 1    | 14.049         | 26032.36        | 1091.00       | 49.79     |
| 2    | 15.754         | 26248.53        | 954.87        | 50.21     |

### Enantioenriched 3g

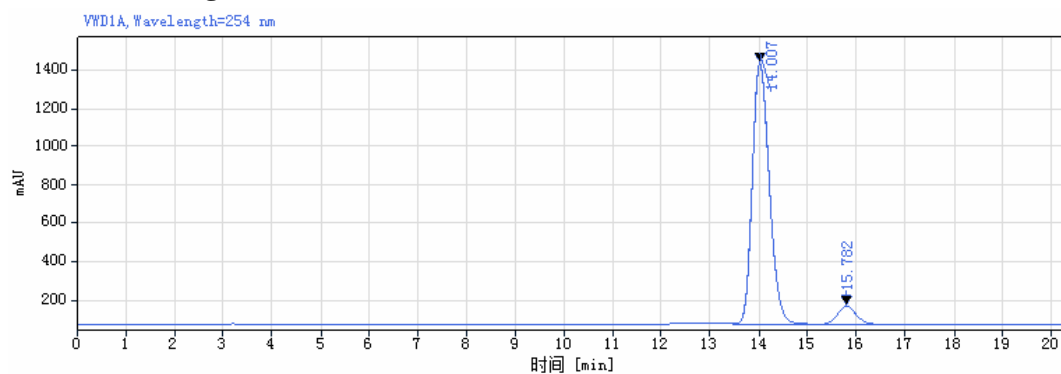

| Peak | RetTime<br>min | Area<br>mAU*min | Height<br>mAU | Area<br>% |
|------|----------------|-----------------|---------------|-----------|
| 1    | 14.007         | 33204.3         | 1364.71       | 92.71     |
| 2    | 15.782         | 2610.35         | 94.81         | 7.29      |

<sup>1</sup>H NMR of **3h** (400 MHz, CDCl<sub>3</sub>)

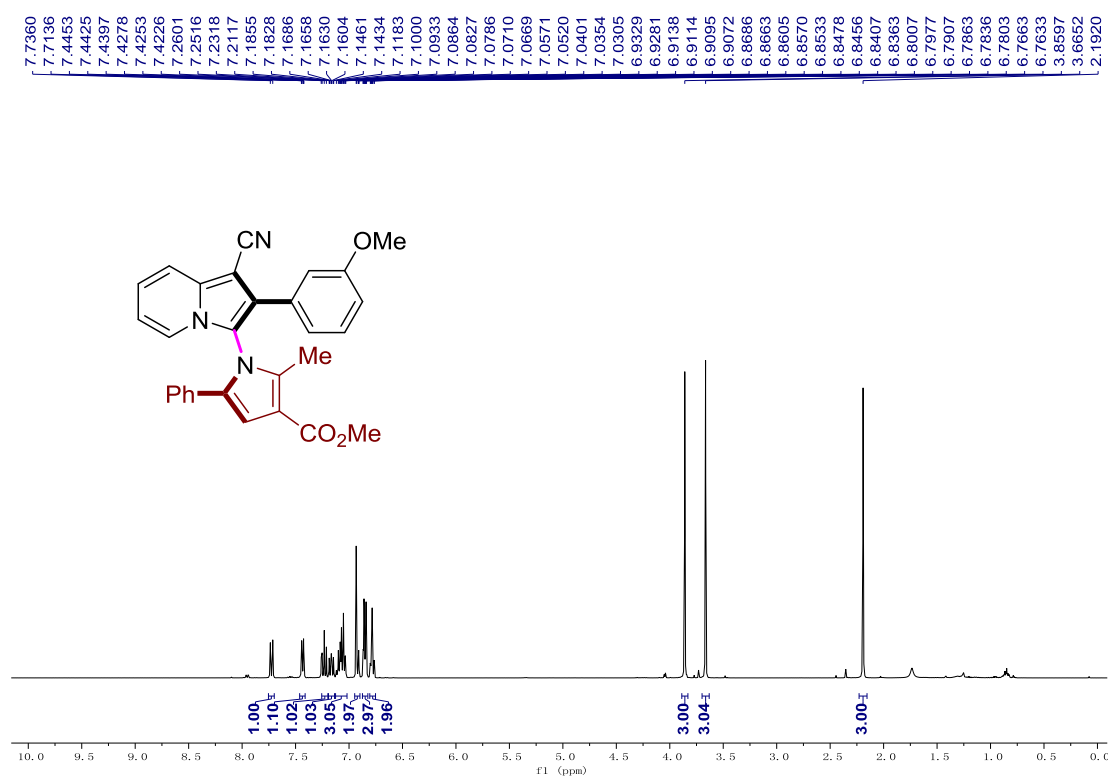

<sup>13</sup>C NMR of **3h** (100 MHz, CDCl<sub>3</sub>)

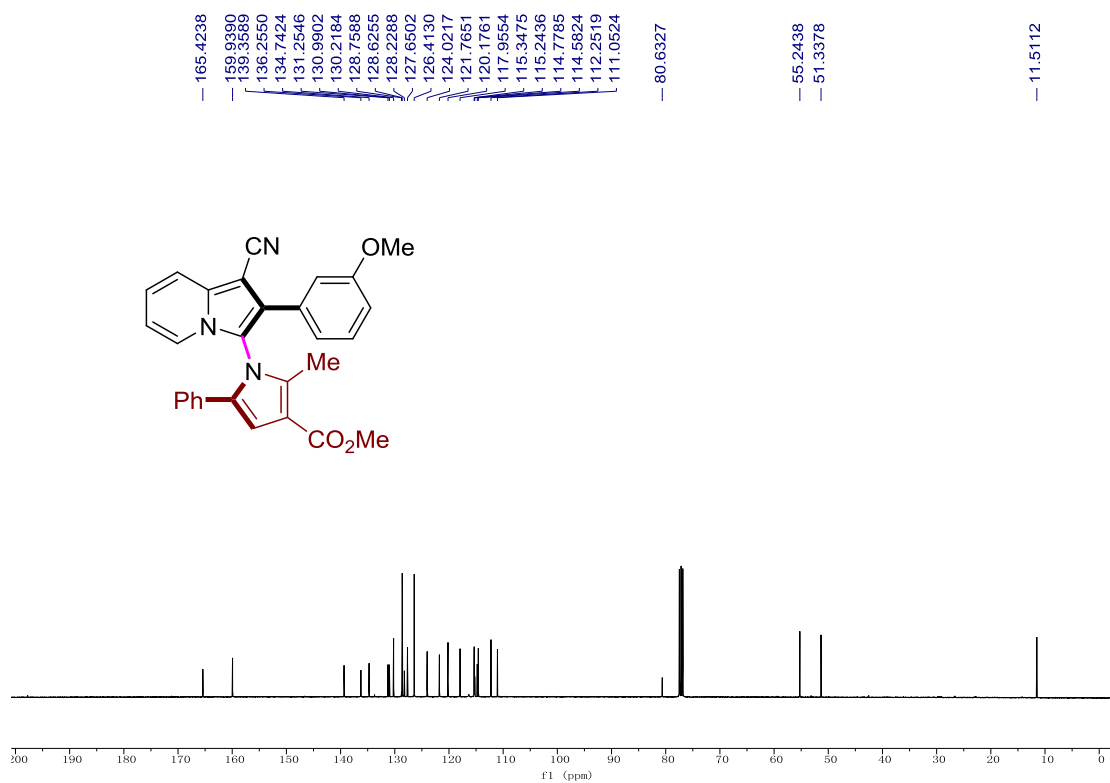

### HPLC analysis: rac-3h

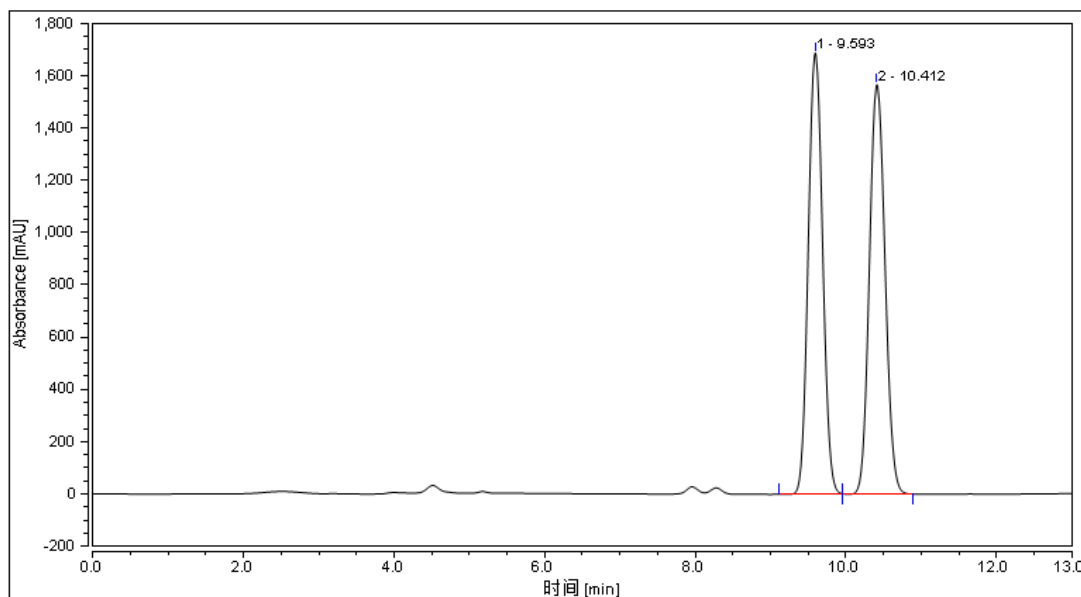

| Peak | RetTime<br>min | Area<br>mAU*min | Height<br>mAU | Area<br>% |
|------|----------------|-----------------|---------------|-----------|
| 1    | 9.593          | 372.729         | 1687.657      | 49.74     |
| 2    | 10.412         | 376.687         | 1565.839      | 50.26     |

### Enantioenriched 3h

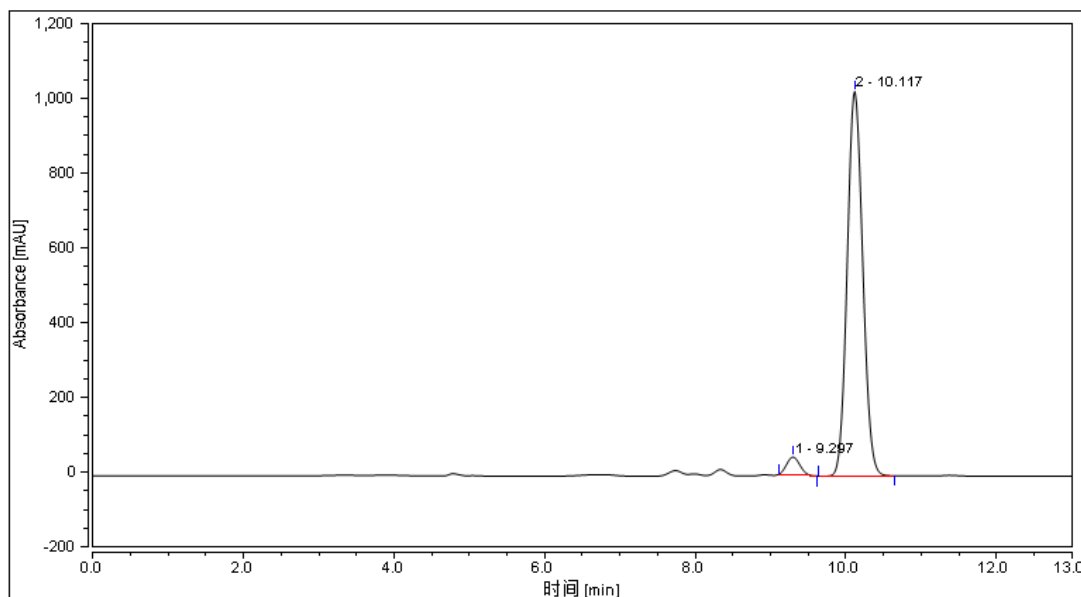

| Peak | RetTime<br>min | Area<br>mAU*min | Height<br>mAU | Area<br>% |
|------|----------------|-----------------|---------------|-----------|
| 1    | 9.297          | 9.867           | 48.219        | 3.87      |
| 2    | 10.117         | 245.405         | 1028.383      | 96.13     |

<sup>1</sup>H NMR of **3i** (400 MHz, CDCl<sub>3</sub>)

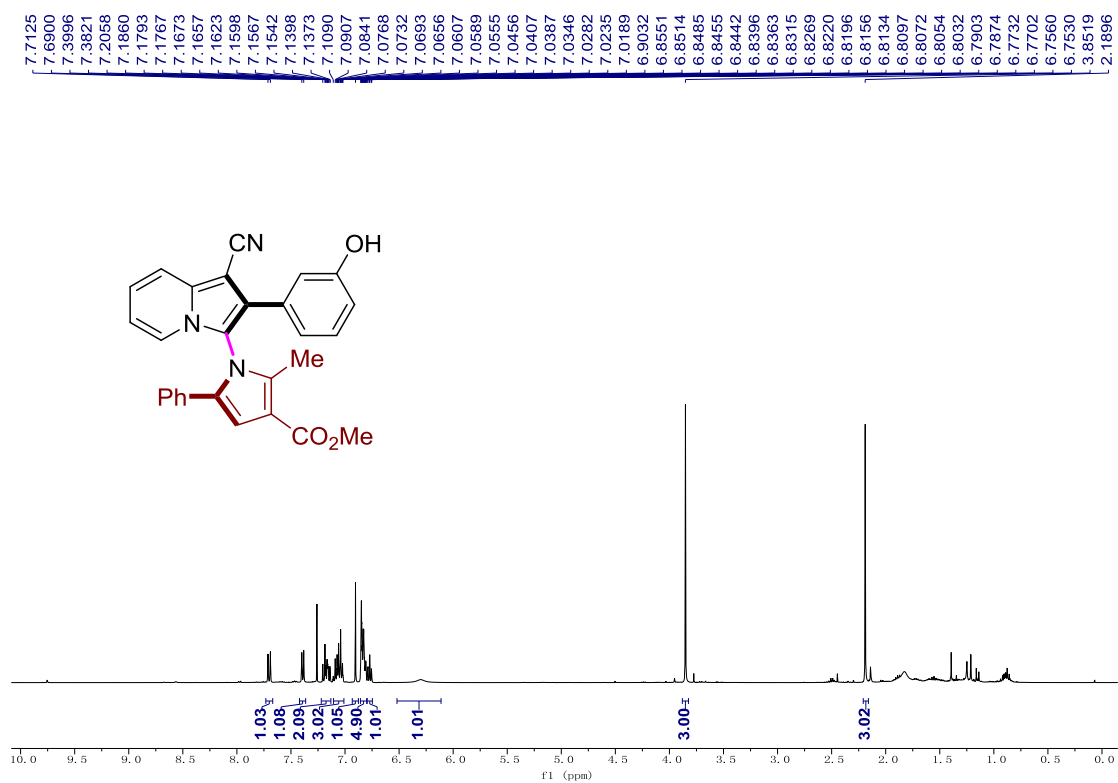

<sup>13</sup>C NMR of **3i** (100 MHz, CDCl<sub>3</sub>)

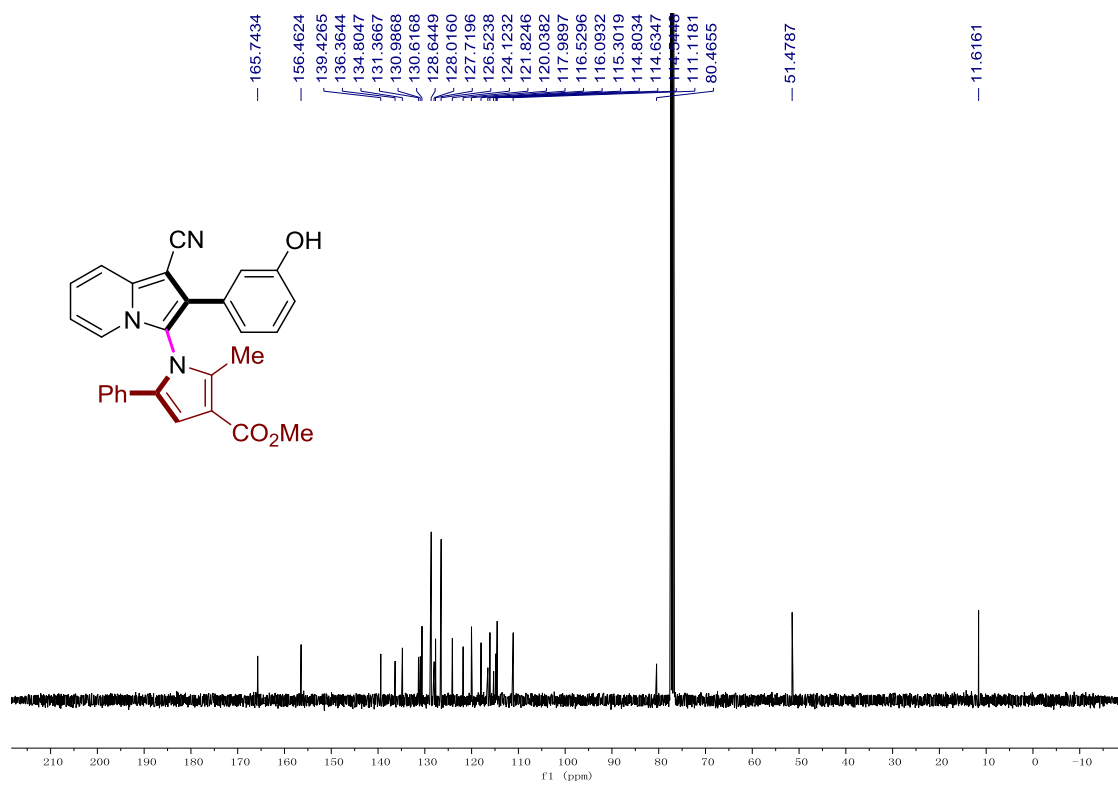

### HPLC analysis: rac-3i

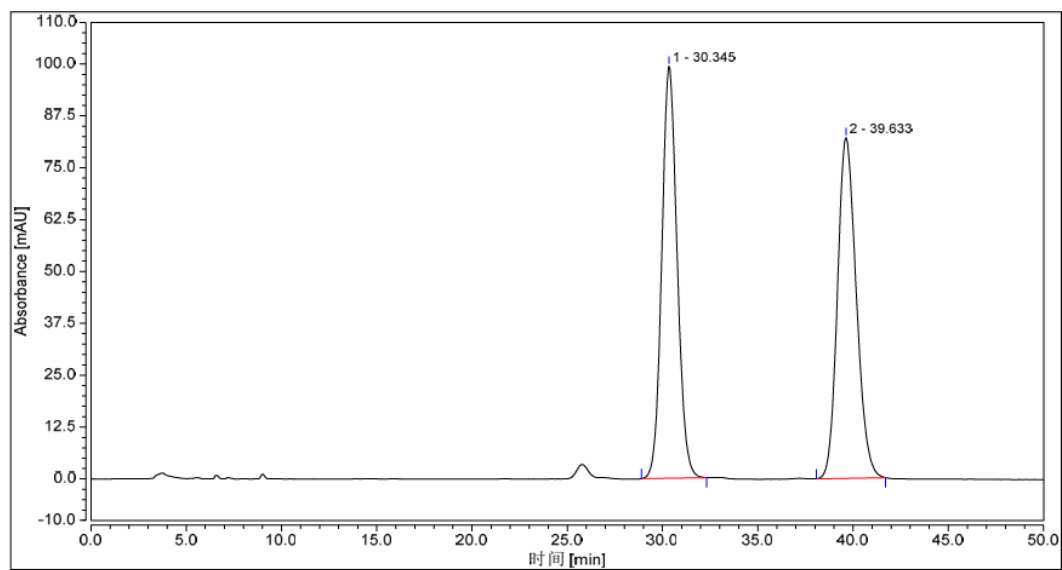

| Peak | RetTime<br>min | Area<br>mAU*min | Height<br>mAU | Area<br>% |
|------|----------------|-----------------|---------------|-----------|
| 1    | 30.345         | 92.665          | 99.319        | 49.69     |
| 2    | 39.633         | 93.828          | 82.132        | 50.31     |

### Enantioenriched 3i

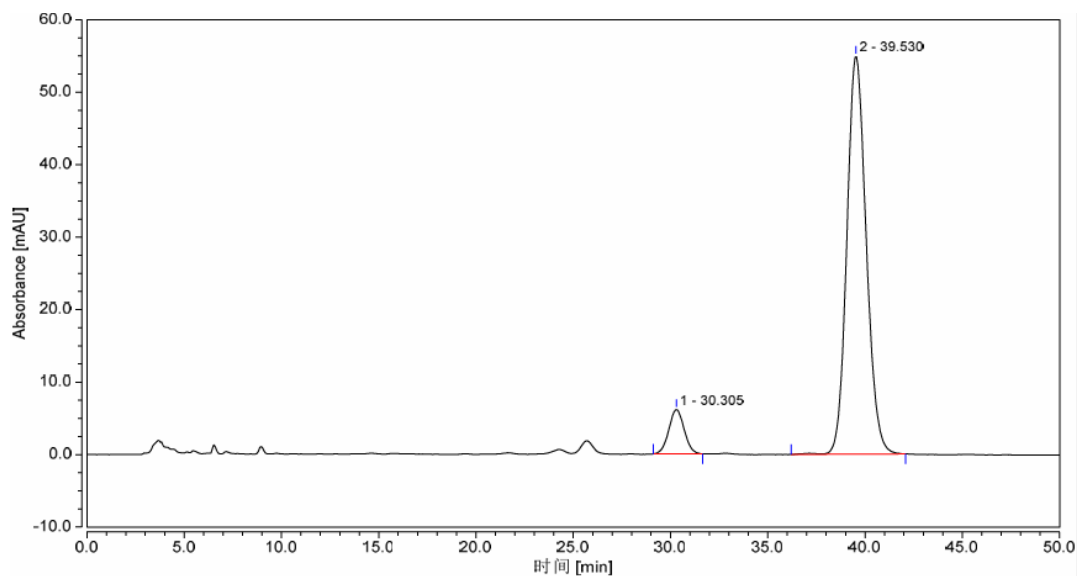

| Peak | RetTime<br>min | Area<br>mAU*min | Height<br>mAU | Area<br>% |
|------|----------------|-----------------|---------------|-----------|
| 1    | 30.305         | 5.610           | 6.141         | 8.14      |
| 2    | 39.530         | 63.299          | 54.968        | 91.86     |

<sup>1</sup>H NMR of **3j** (400 MHz, CDCl<sub>3</sub>)

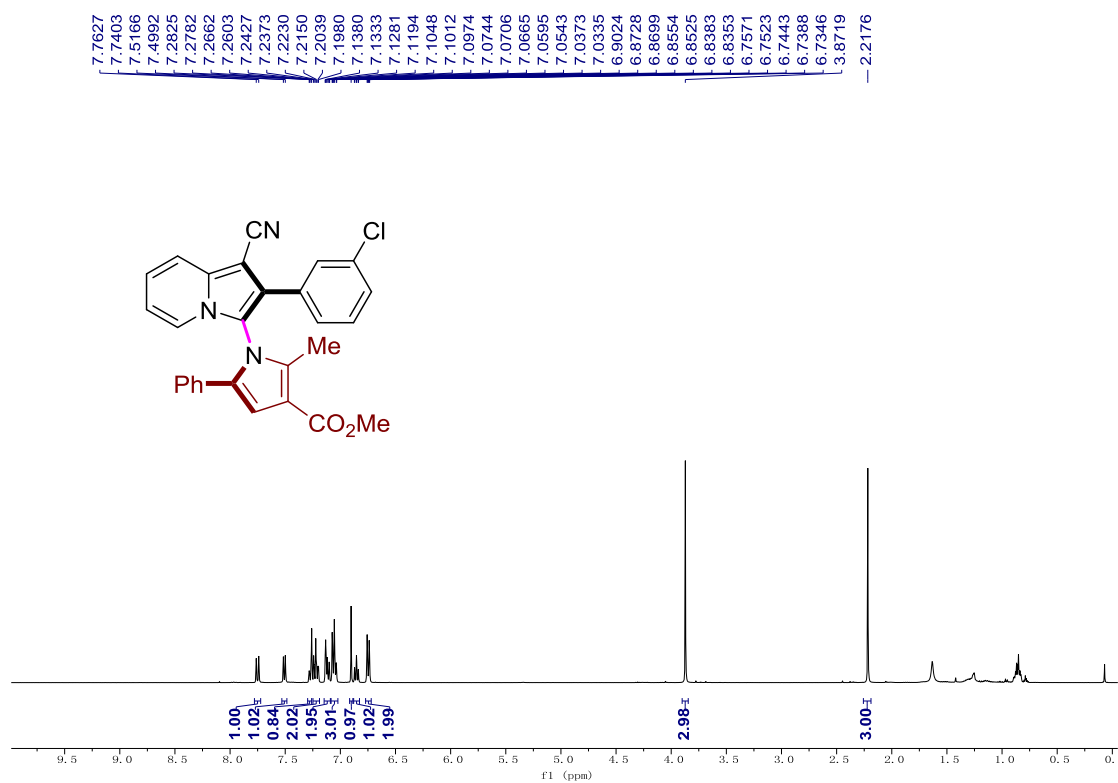

<sup>13</sup>C NMR of **3j** (100 MHz, CDCl<sub>3</sub>)

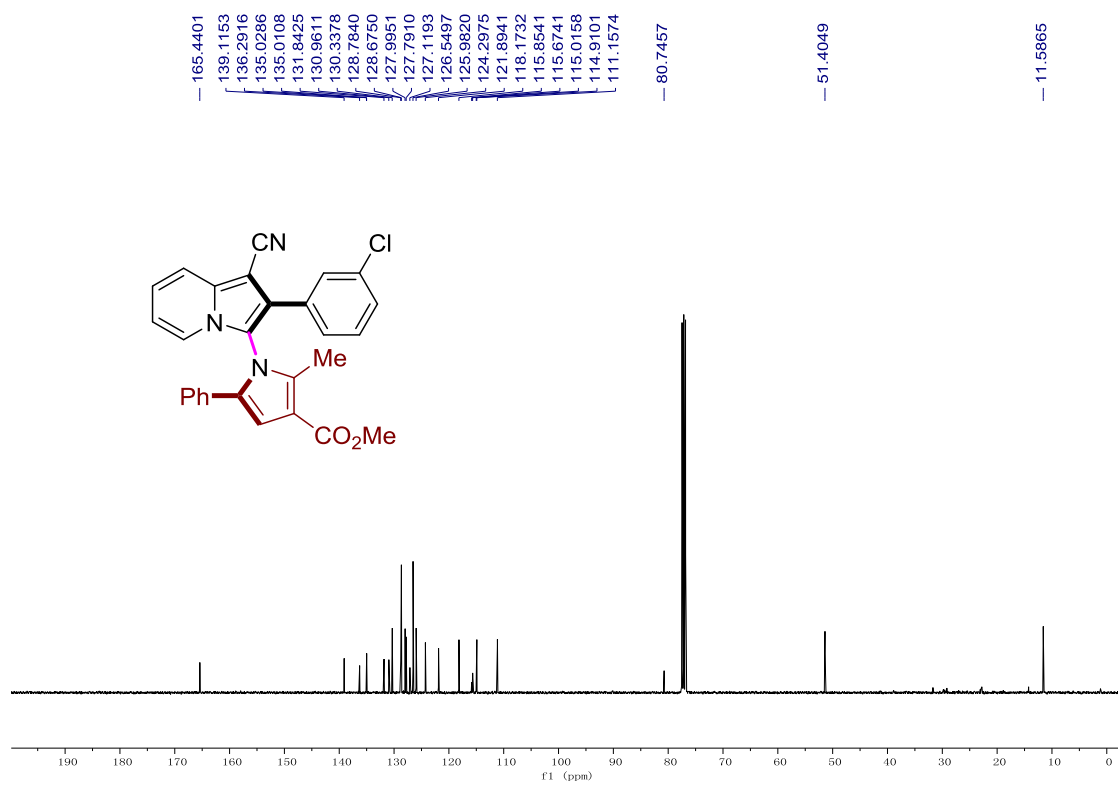

### HPLC analysis: rac-3j

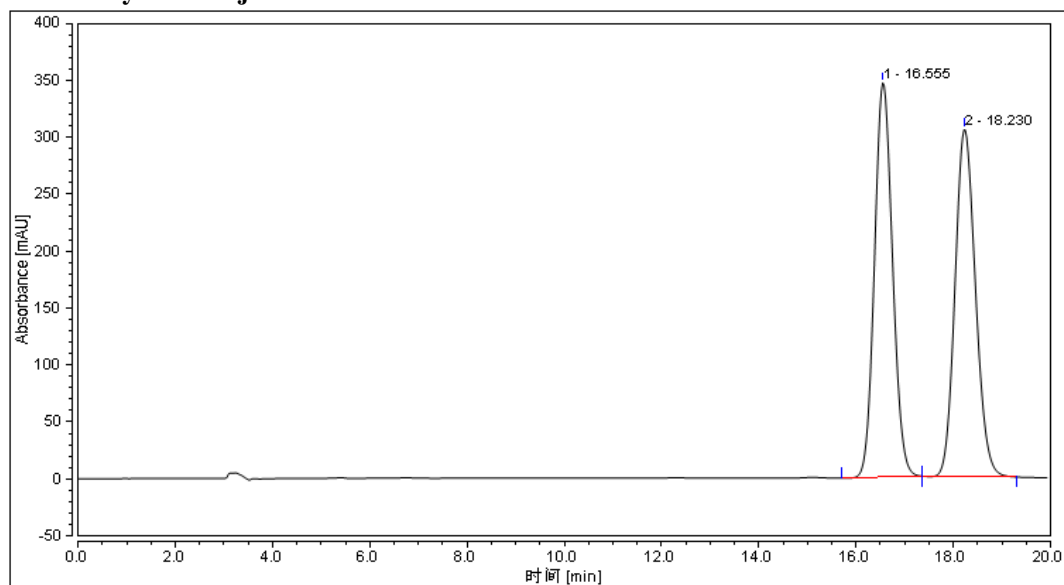

| Peak | RetTime<br>min | Area<br>mAU*min | Height<br>mAU | Area<br>% |
|------|----------------|-----------------|---------------|-----------|
| 1    | 16.555         | 148.832         | 346.468       | 50.09     |
| 2    | 18.230         | 148.288         | 305.134       | 49.91     |

### Enantioenriched 3j

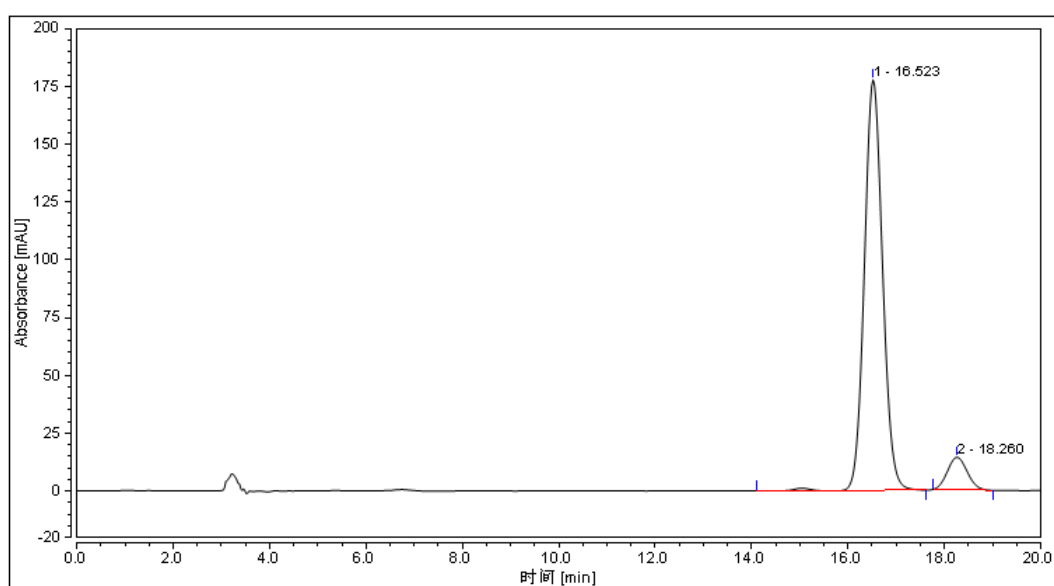

| Peak | RetTime<br>min | Area<br>mAU*min | Height<br>mAU | Area<br>% |
|------|----------------|-----------------|---------------|-----------|
| 1    | 16.523         | 77.740          | 177.561       | 92.09     |
| 2    | 18.260         | 6.681           | 14.053        | 7.91      |



<sup>1</sup>H NMR of **3k** (400 MHz, CDCl<sub>3</sub>)

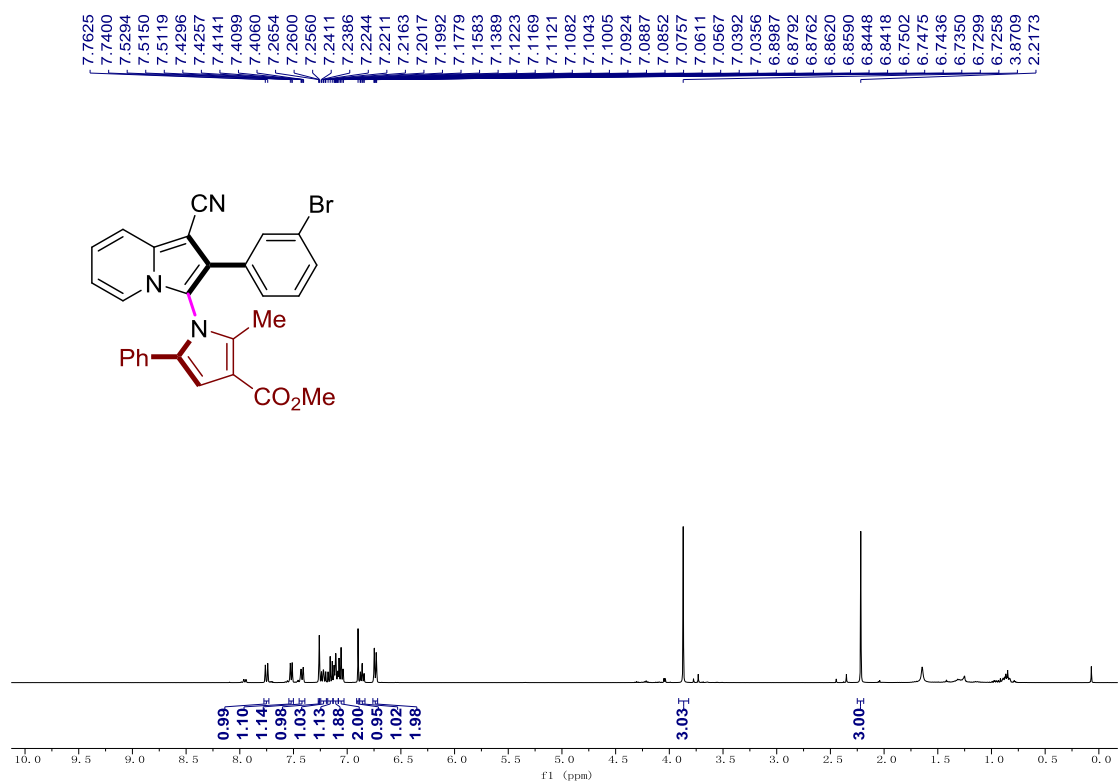

<sup>13</sup>C NMR of **3k** (100 MHz, CDCl<sub>3</sub>)

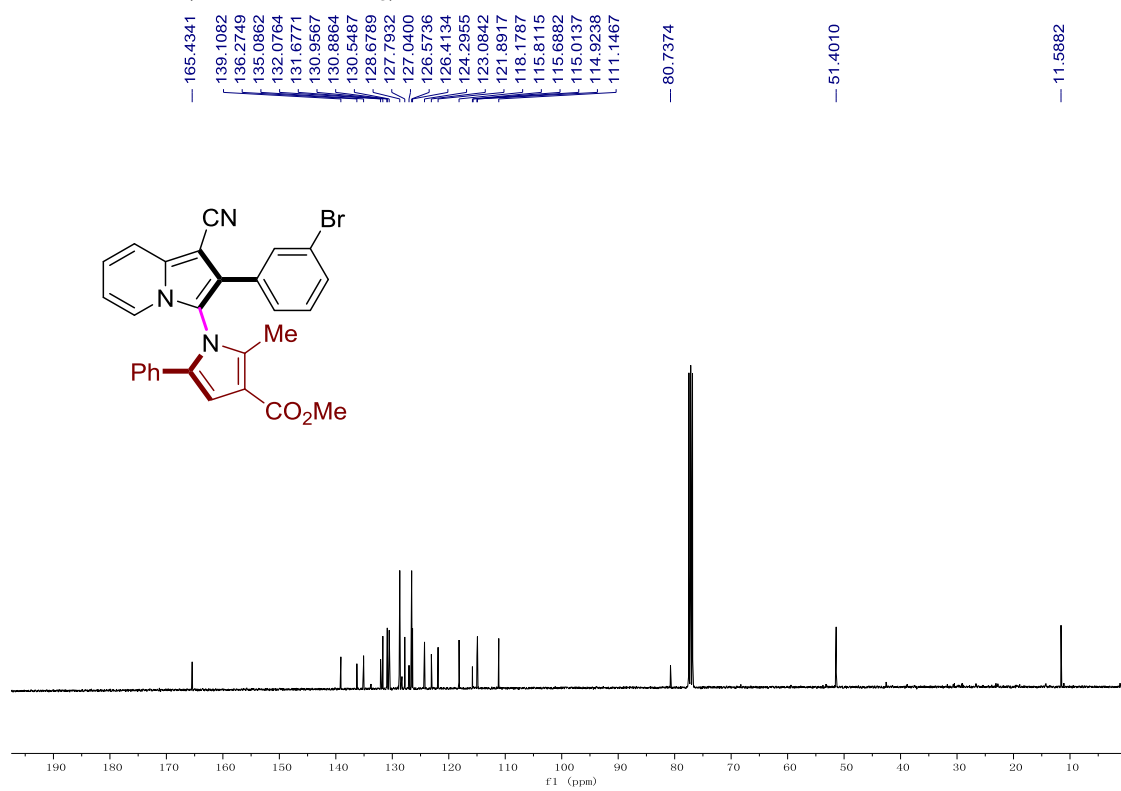

### HPLC analysis: rac-3k

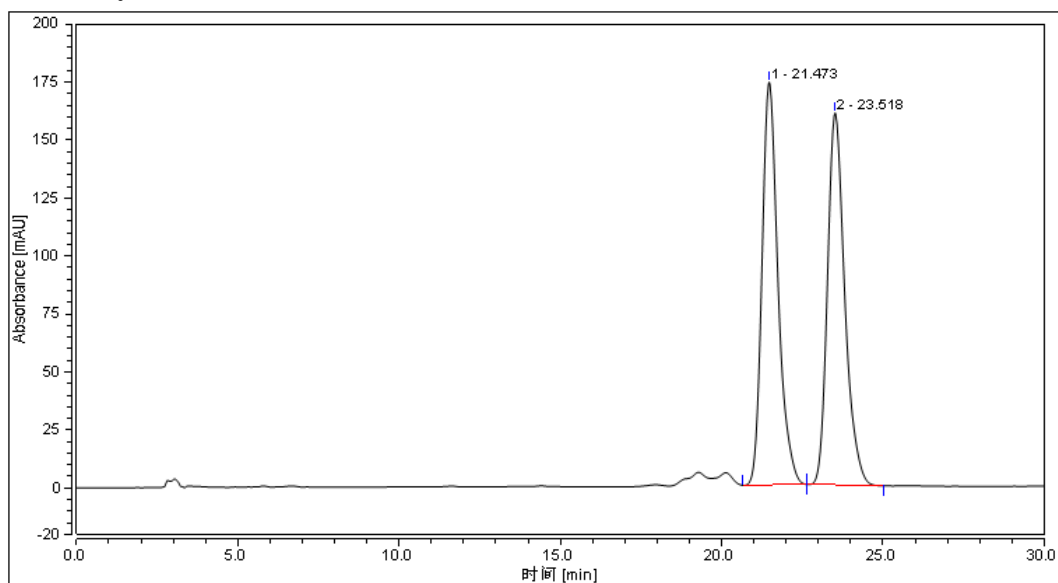

| Peak | RetTime<br>min | Area<br>mAU*min | Height<br>mAU | Area<br>% |
|------|----------------|-----------------|---------------|-----------|
| 1    | 21.473         | 99.908          | 173.734       | 50.10     |
| 2    | 23.518         | 99.508          | 160.474       | 49.90     |

### Enantioenriched 3k

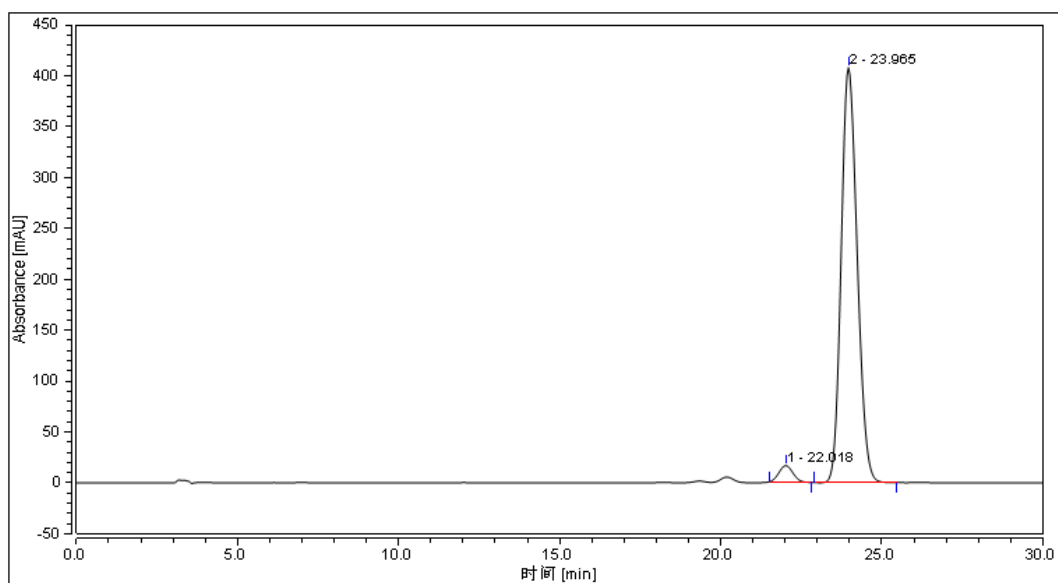

| Peak | RetTime<br>min | Area<br>mAU*min | Height<br>mAU | Area<br>% |
|------|----------------|-----------------|---------------|-----------|
| 1    | 22.018         | 8.043           | 16.093        | 3.33      |
| 2    | 23.965         | 233.567         | 408.058       | 96.67     |

<sup>1</sup>H NMR of **3I** (400 MHz, CDCl<sub>3</sub>)

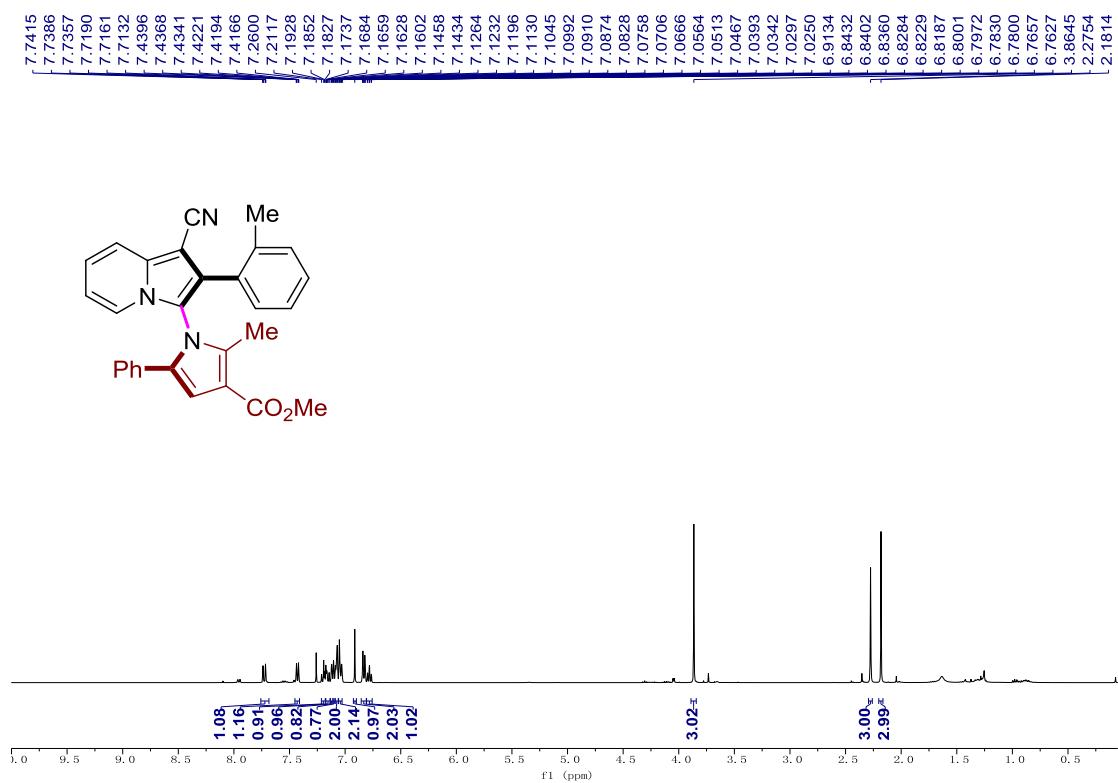

<sup>13</sup>C NMR of **3I** (100 MHz, CDCl<sub>3</sub>)

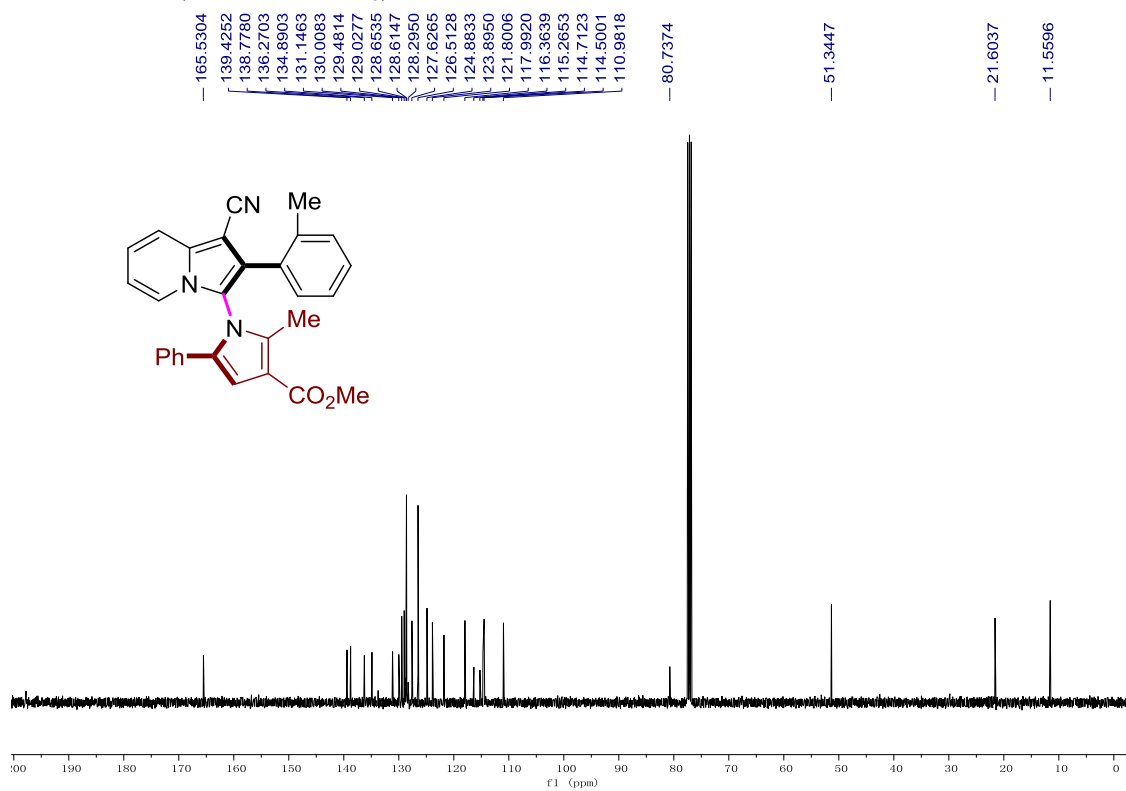

### HPLC analysis: rac-3I

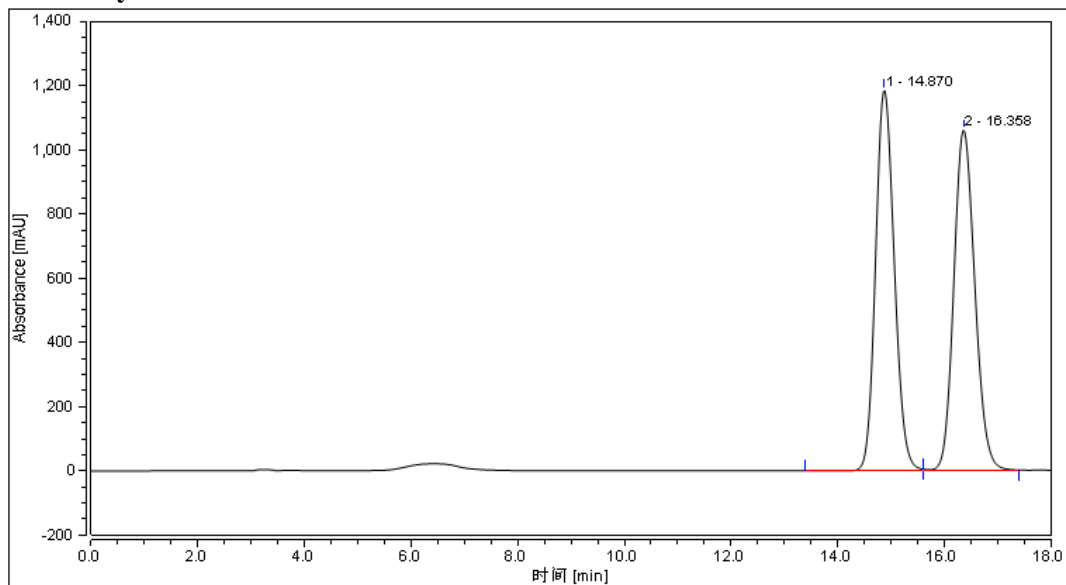

| Peak | RetTime<br>min | Area<br>mAU*min | Height<br>mAU | Area<br>% |
|------|----------------|-----------------|---------------|-----------|
| 1    | 14.870         | 480.297         | 1185.372      | 49.89     |
| 2    | 16.358         | 482.351         | 1059.948      | 50.11     |

### Enantioenriched 3I

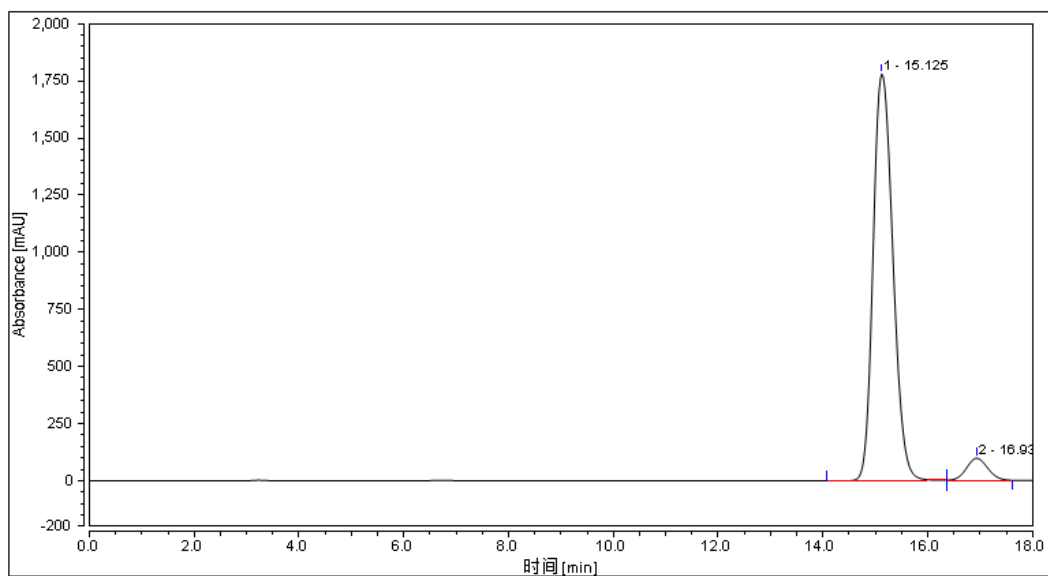

| Peak | RetTime<br>min | Area<br>mAU*min | Height<br>mAU | Area<br>% |
|------|----------------|-----------------|---------------|-----------|
| 1    | 15.125         | 776.391         | 1780.047      | 94.52     |
| 2    | 16.935         | 45.033          | 96.424        | 5.48      |

<sup>1</sup>H NMR of **3m** (400 MHz, CDCl<sub>3</sub>)

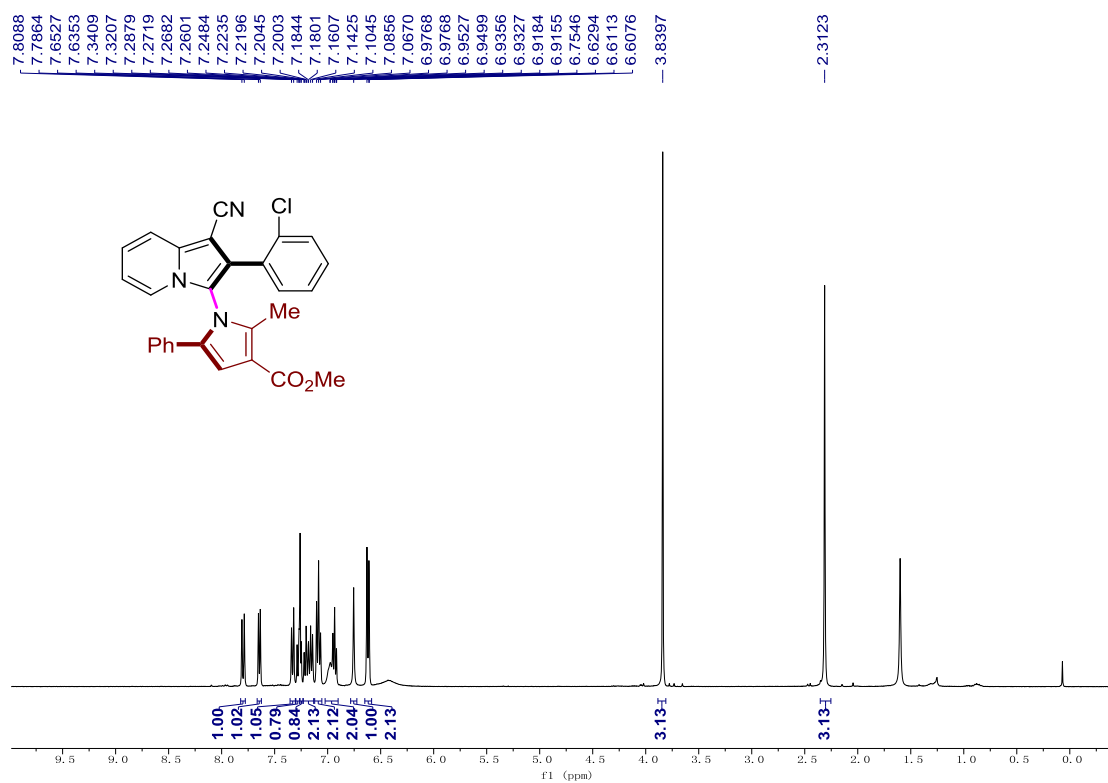

<sup>13</sup>C NMR of **3m** (100 MHz, CDCl<sub>3</sub>)

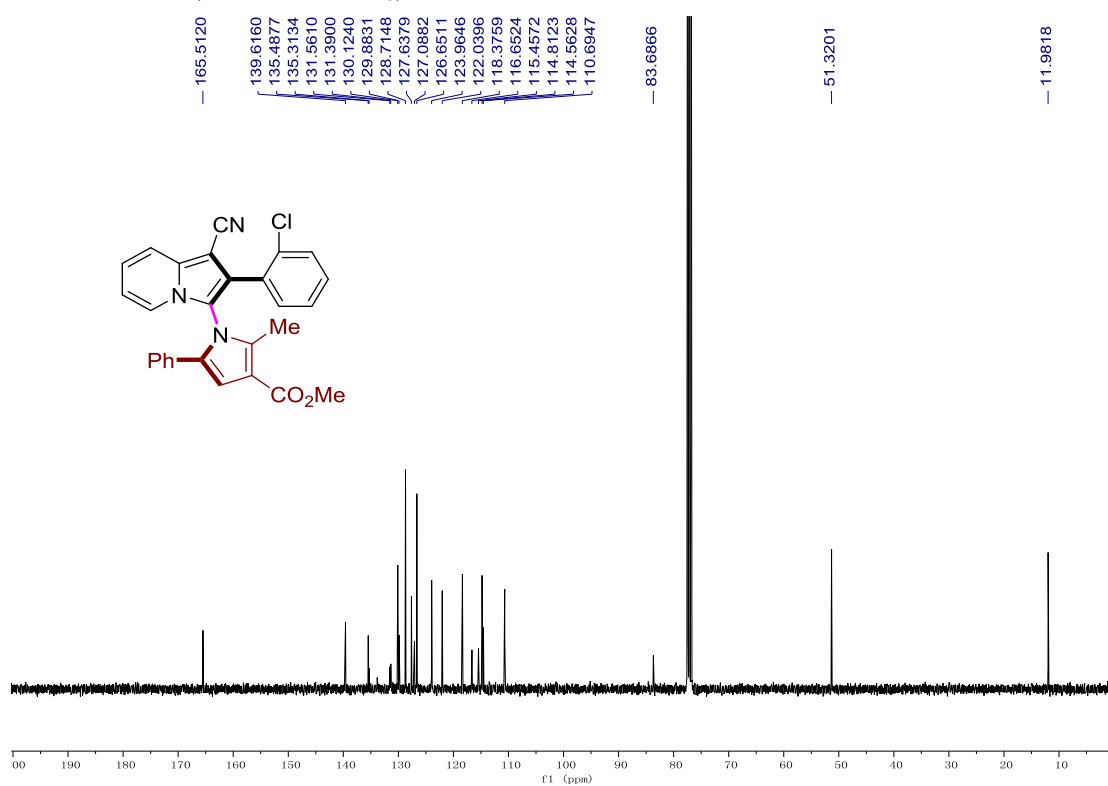

### HPLC analysis: rac-3m

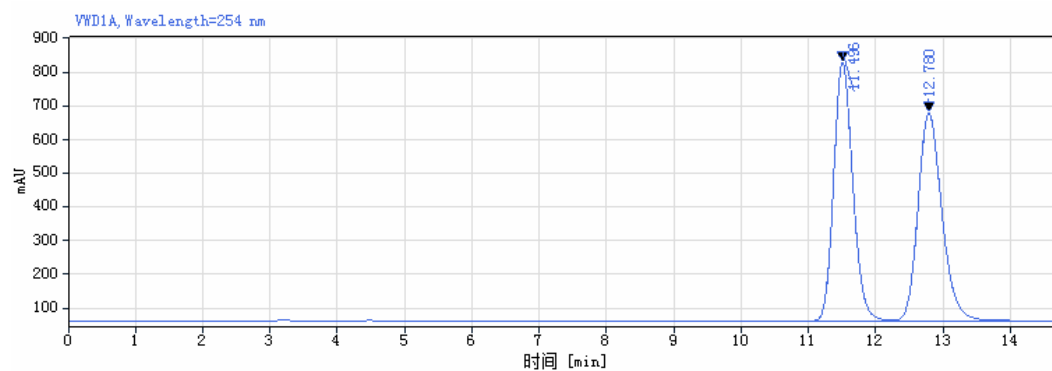

| Peak | RetTime (min) | Area (mAU*min) | Height (mAU) | Area (%) |
|------|---------------|----------------|--------------|----------|
| 1    | 11.496        | 15119.03       | 765.57       | 49.87    |
| 2    | 12.780        | 15197.4        | 616.39       | 50.13    |

### Enantioenriched 3m

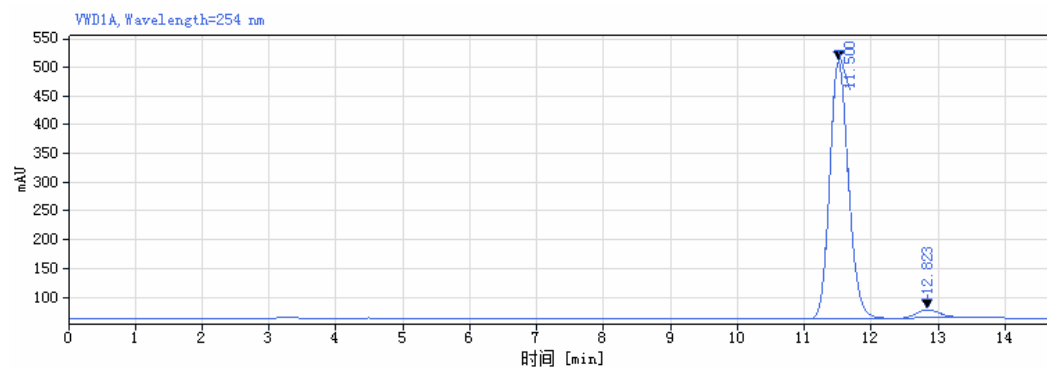

| Peak | RetTime (min) | Area (mAU*min) | Height (mAU) | Area (%) |
|------|---------------|----------------|--------------|----------|
| 1    | 11.500        | 8751.47        | 447.89       | 96.34    |
| 2    | 12.823        | 332.2          | 13.87        | 3.66     |

<sup>1</sup>H NMR of **3n** (400 MHz, CDCl<sub>3</sub>)

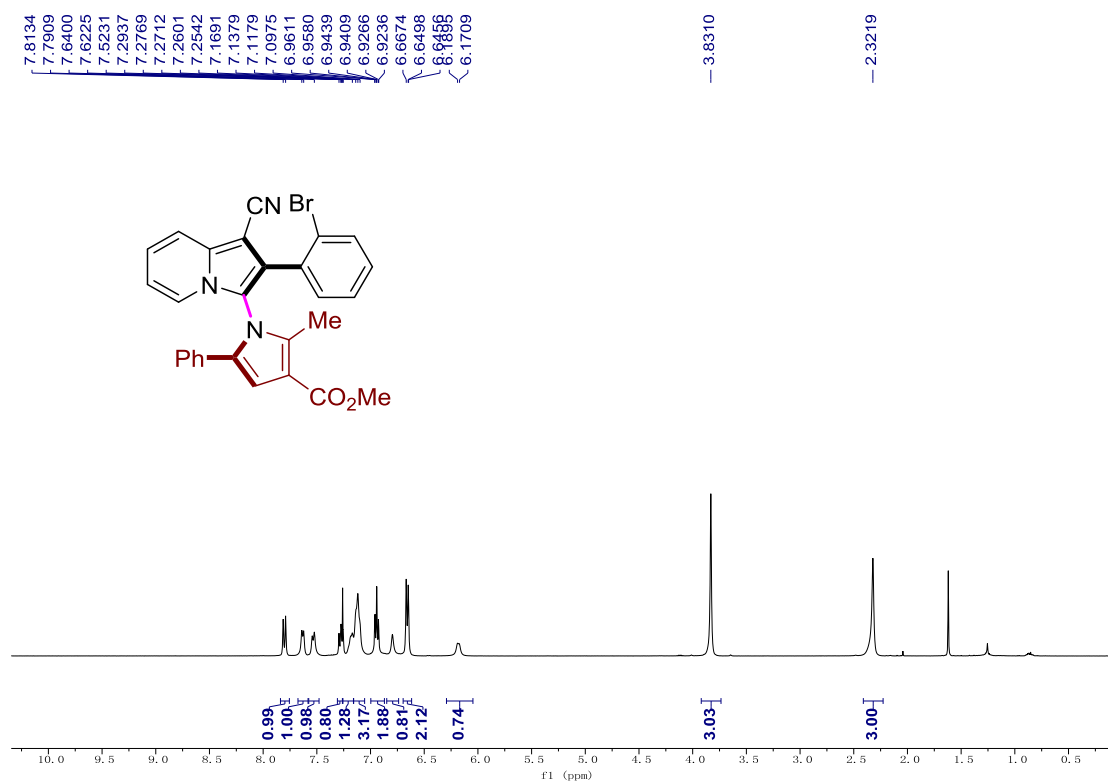

<sup>13</sup>C NMR of **3n** (100 MHz, CDCl<sub>3</sub>)

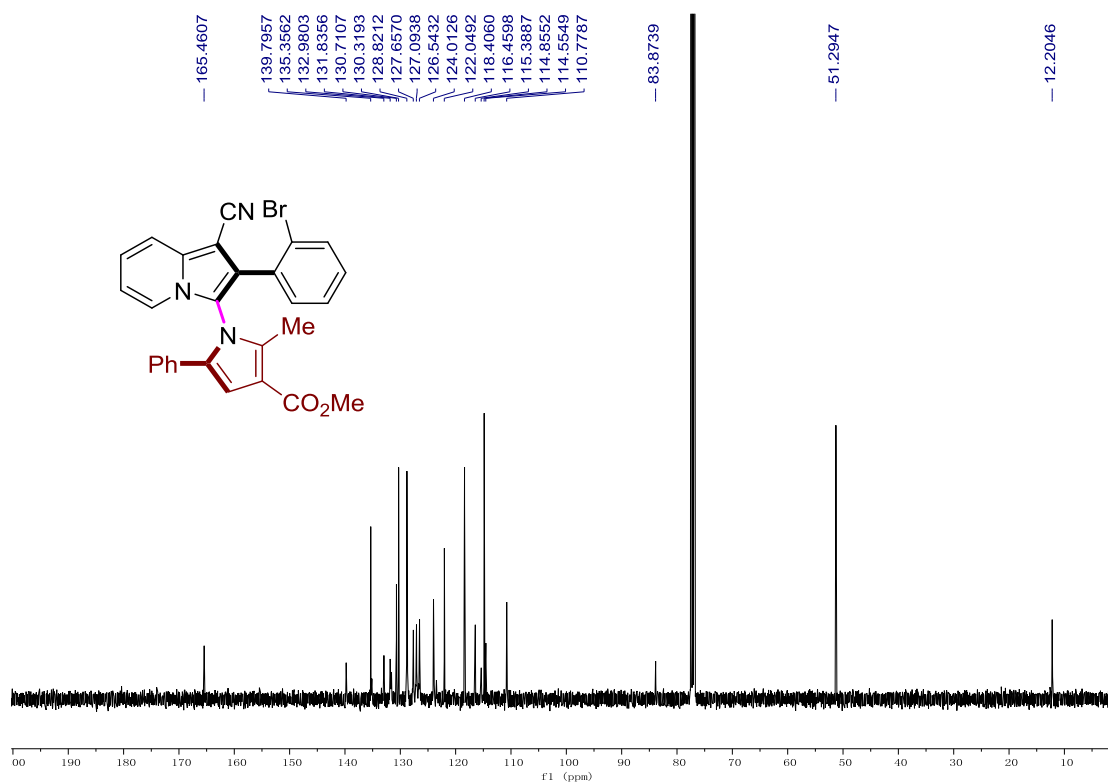

### HPLC analysis: rac-3n

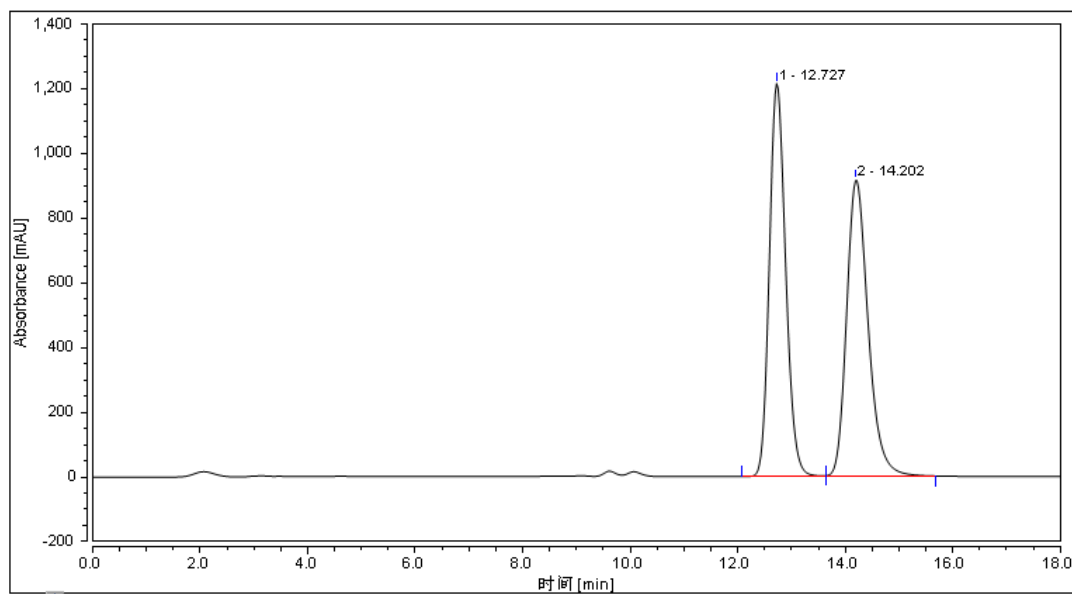

| Peak | RetTime<br>min | Area<br>mAU*min | Height<br>mAU | Area<br>% |
|------|----------------|-----------------|---------------|-----------|
| 1    | 12.727         | 424.412         | 1213.815      | 50.12     |
| 2    | 14.202         | 422.362         | 914.559       | 49.88     |

### Enantioenriched 3n

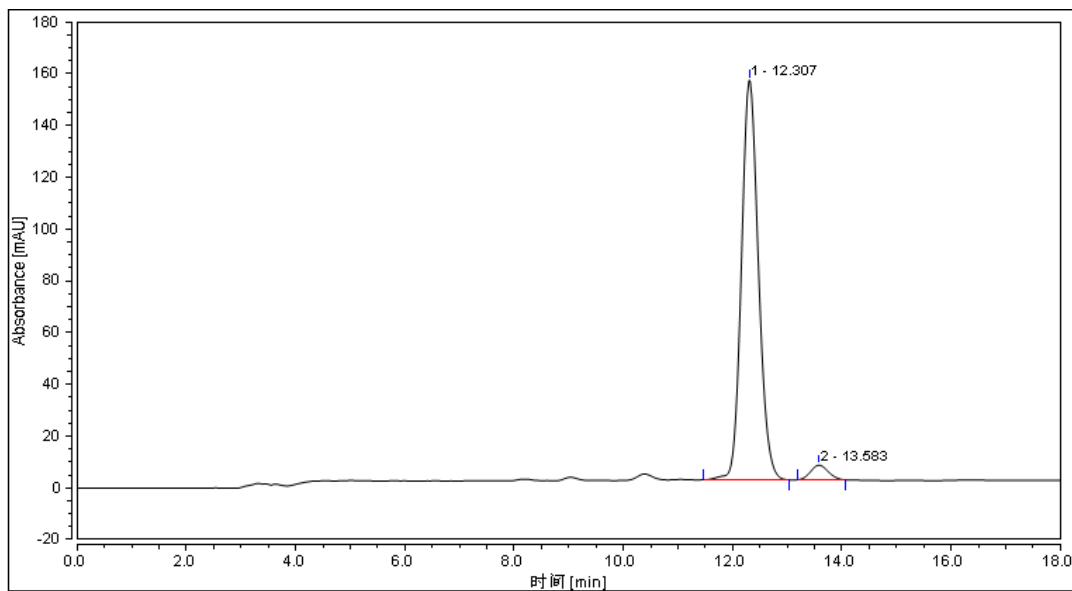

| Peak | RetTime<br>min | Area<br>mAU*min | Height<br>mAU | Area<br>% |
|------|----------------|-----------------|---------------|-----------|
| 1    | 12.307         | 55.671          | 154.521       | 93.31     |
| 2    | 13.583         | 2.132           | 5.690         | 3.69      |



<sup>1</sup>H NMR of **3o** (400 MHz, CDCl<sub>3</sub>)

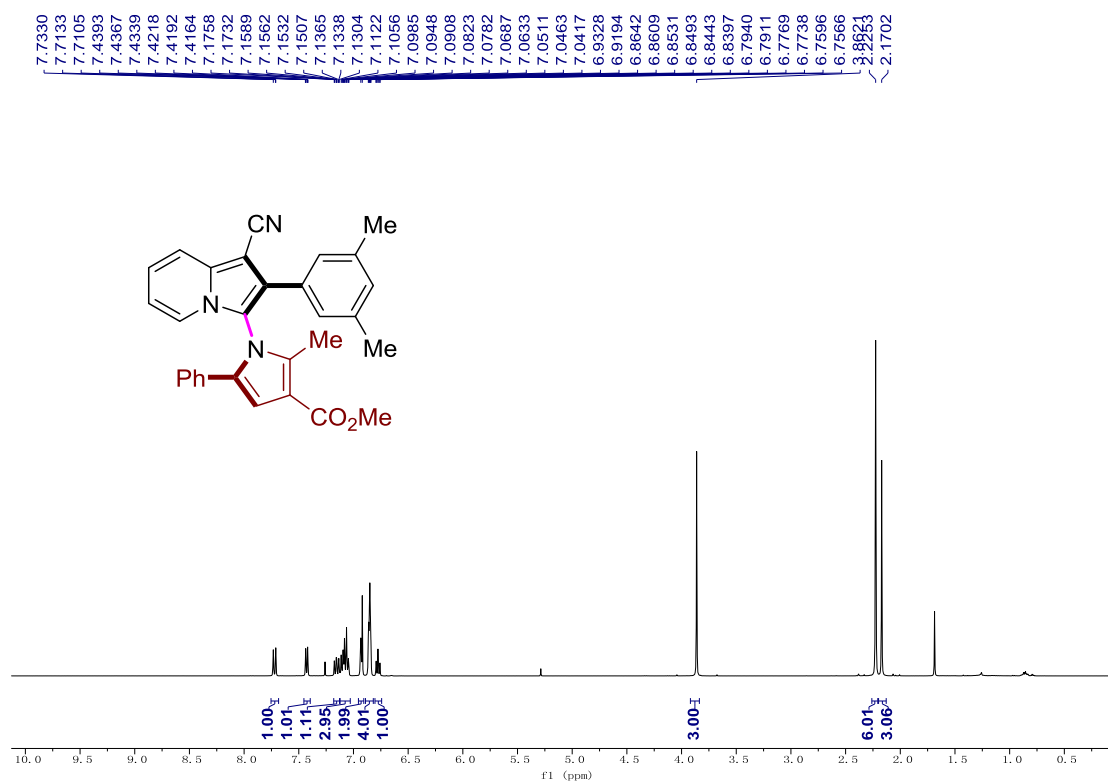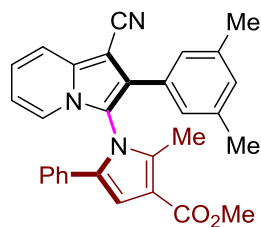

<sup>13</sup>C NMR of **3o** (100 MHz, CDCl<sub>3</sub>)

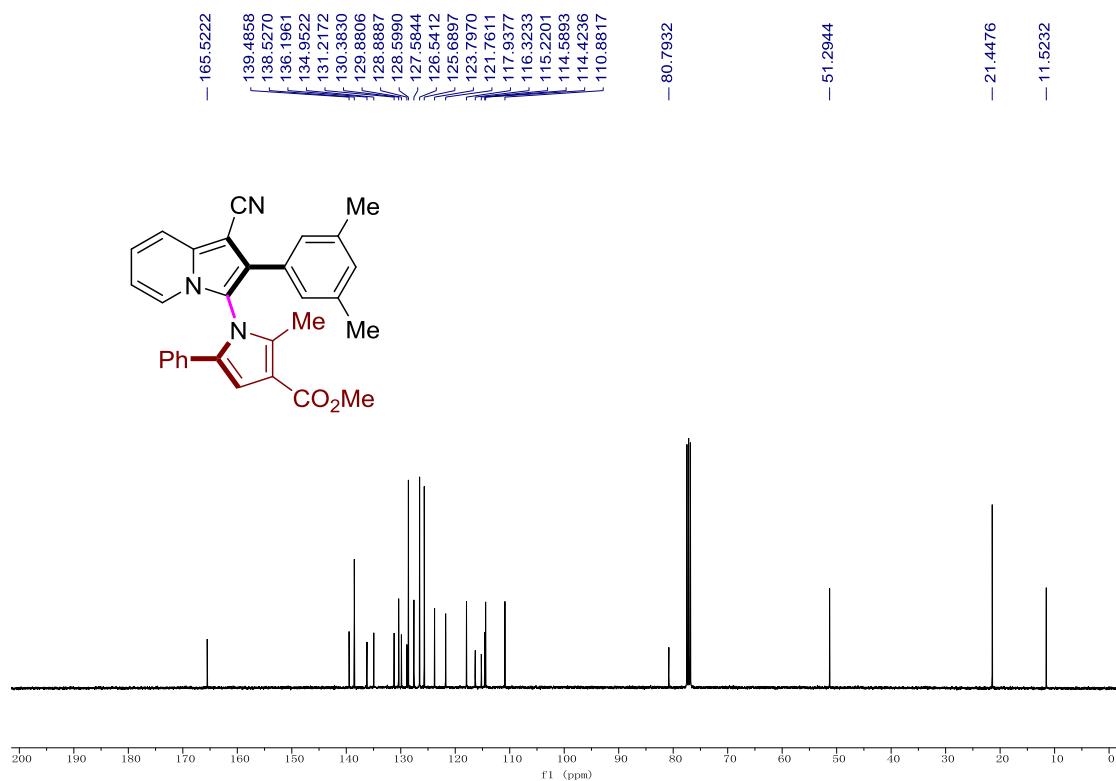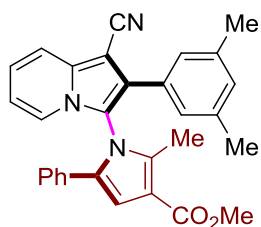

### HPLC analysis: rac-3o

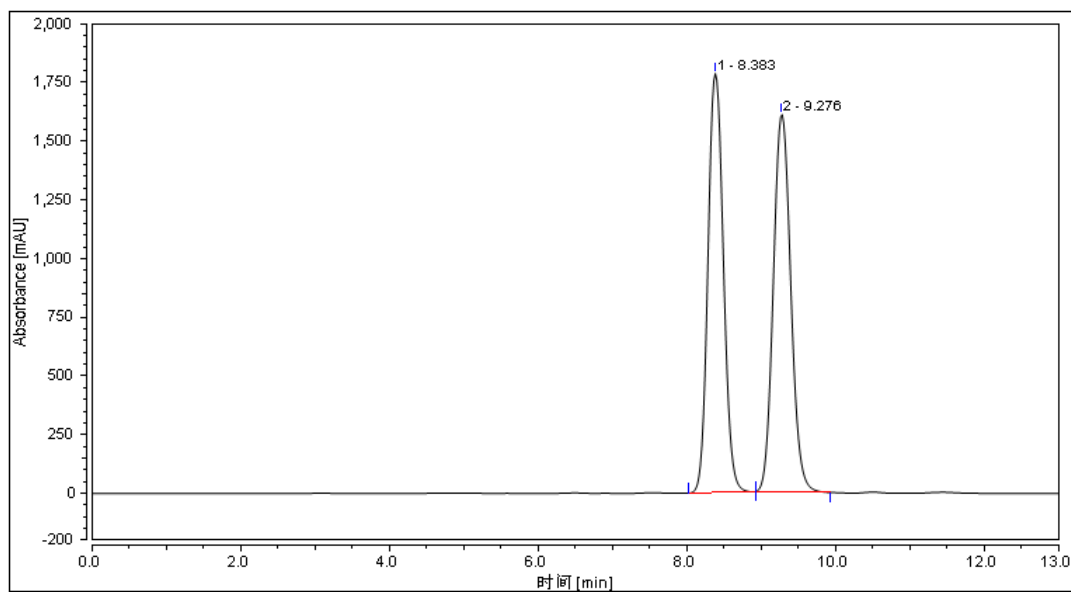

| Peak | RetTime<br>min | Area<br>mAU*min | Height<br>mAU | Area<br>% |
|------|----------------|-----------------|---------------|-----------|
| 1    | 8.383          | 429.402         | 1785.561      | 49.59     |
| 2    | 9.276          | 436.491         | 1608.785      | 50.41     |

### Enantioenriched 3o

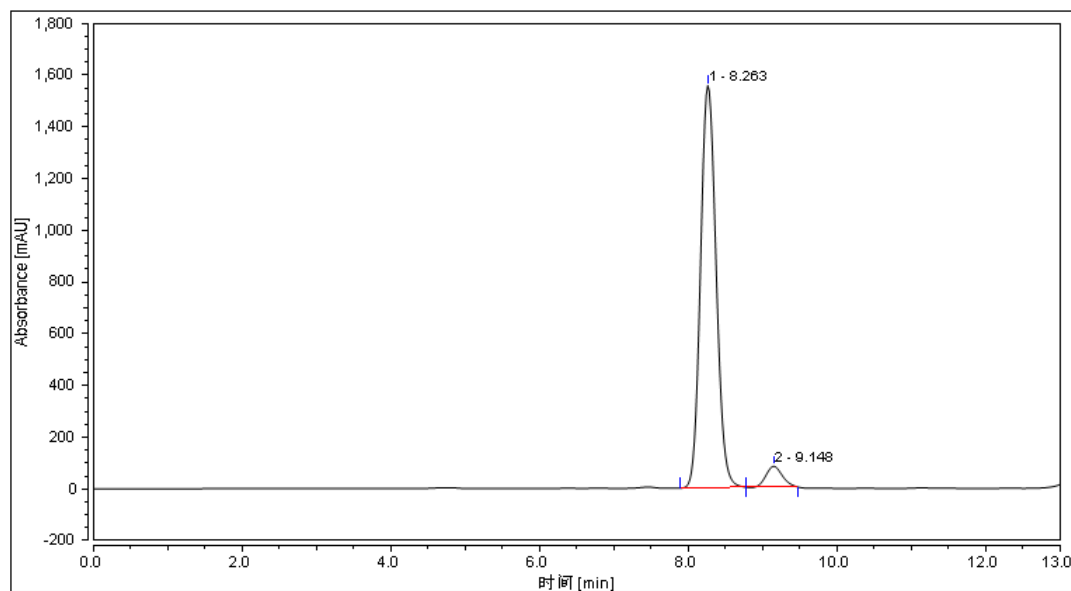

| Peak | RetTime<br>min | Area<br>mAU*min | Height<br>mAU | Area<br>% |
|------|----------------|-----------------|---------------|-----------|
| 1    | 8.263          | 376.587         | 1556.039      | 94.89     |
| 2    | 9.148          | 20.270          | 80.195        | 5.11      |

<sup>1</sup>H NMR of **3p** (400 MHz, CDCl<sub>3</sub>)

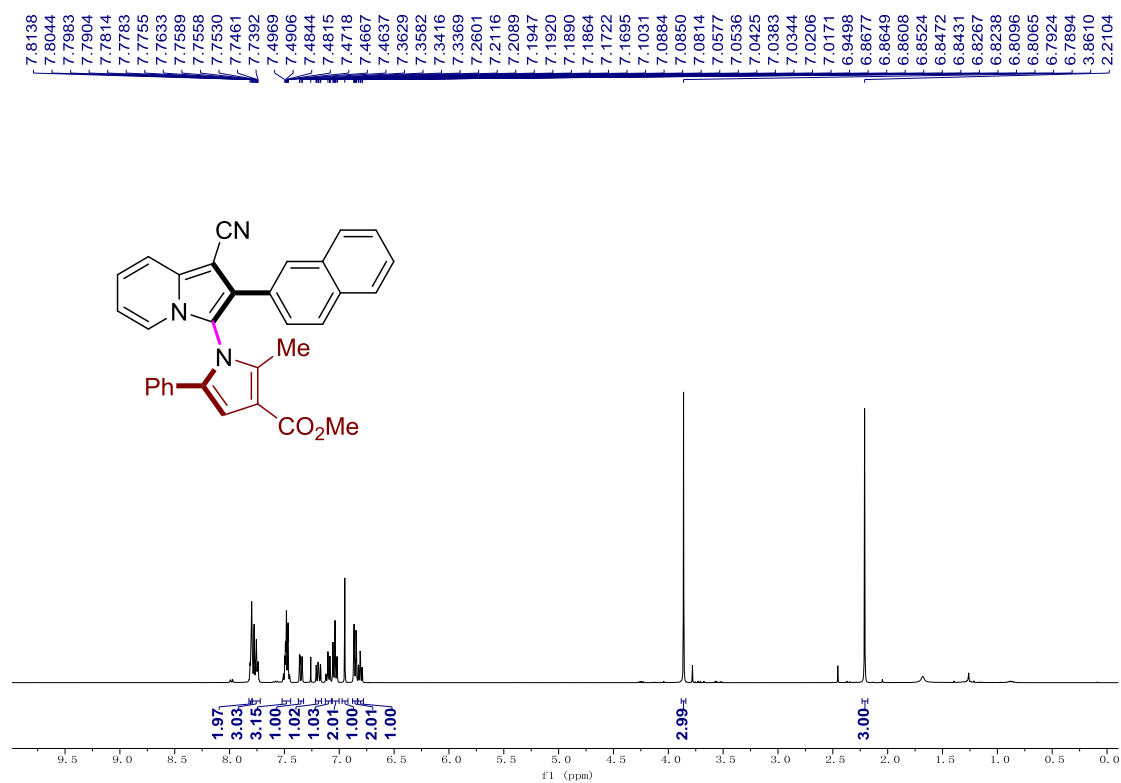

<sup>13</sup>C NMR of **3p** (100 MHz, CDCl<sub>3</sub>)

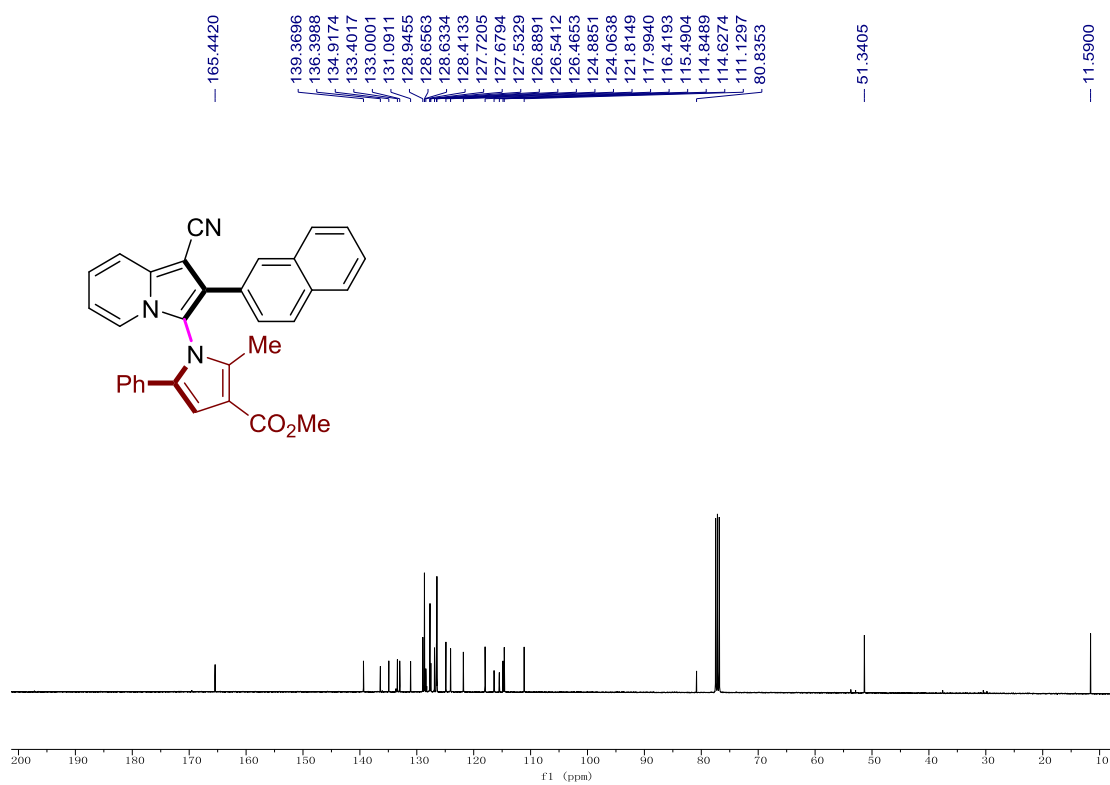

### HPLC analysis: rac-3p

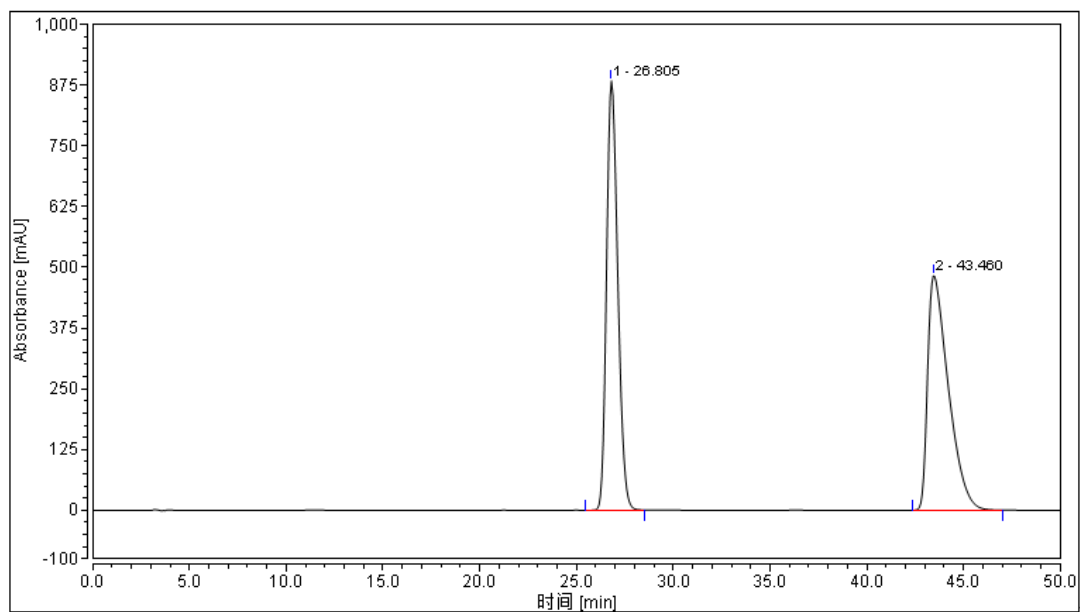

| Peak | RetTime<br>min | Area<br>mAU*min | Height<br>mAU | Area<br>% |
|------|----------------|-----------------|---------------|-----------|
| 1    | 26.805         | 592.854         | 883.234       | 49.74     |
| 2    | 43.460         | 599.139         | 483.214       | 50.26     |

### Enantioenriched 3p

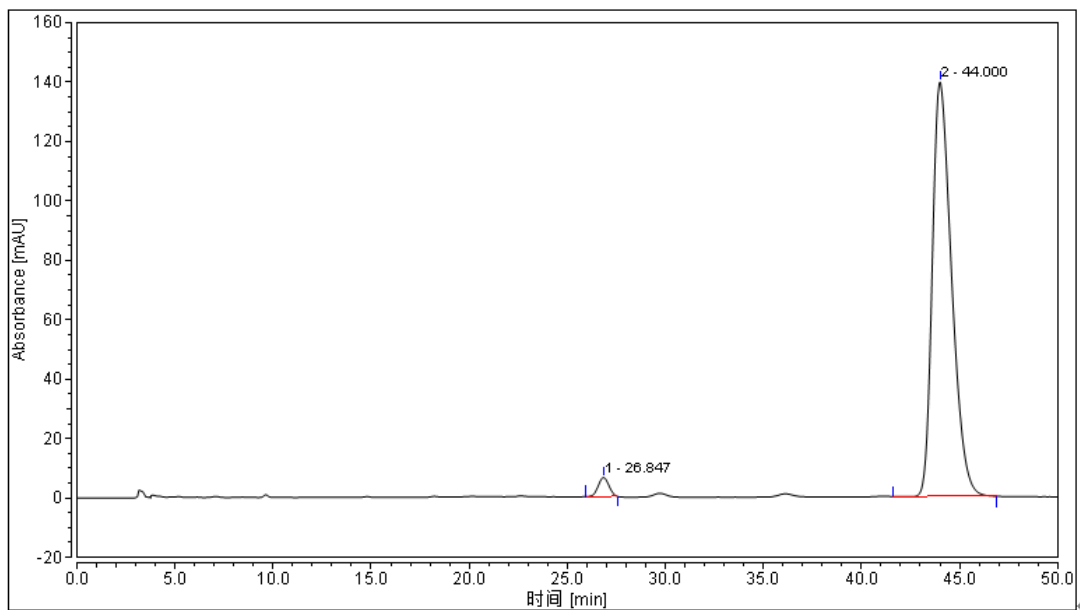

| Peak | RetTime<br>min | Area<br>mAU*min | Height<br>mAU | Area<br>% |
|------|----------------|-----------------|---------------|-----------|
| 1    | 26.847         | 4.046           | 6.433         | 2.49      |
| 2    | 44.000         | 158.745         | 139.574       | 97.51     |

<sup>1</sup>H NMR of **3q** (400 MHz, CDCl<sub>3</sub>)

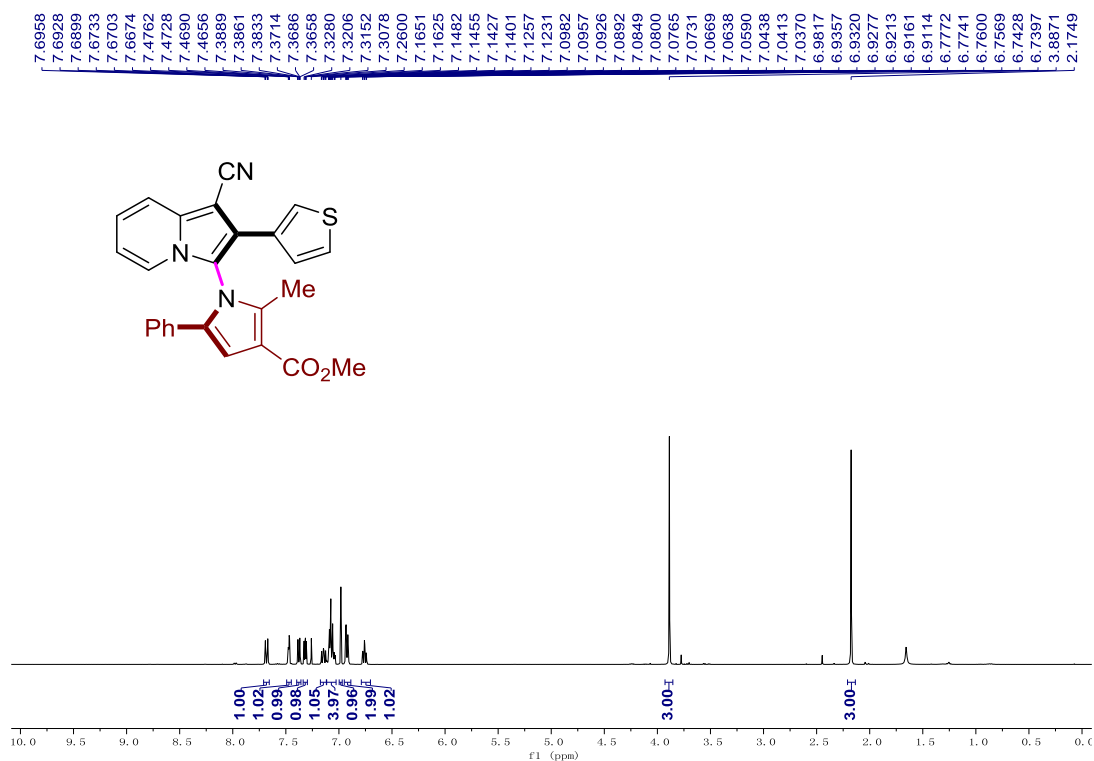

<sup>13</sup>C NMR of **3q** (100 MHz, CDCl<sub>3</sub>)

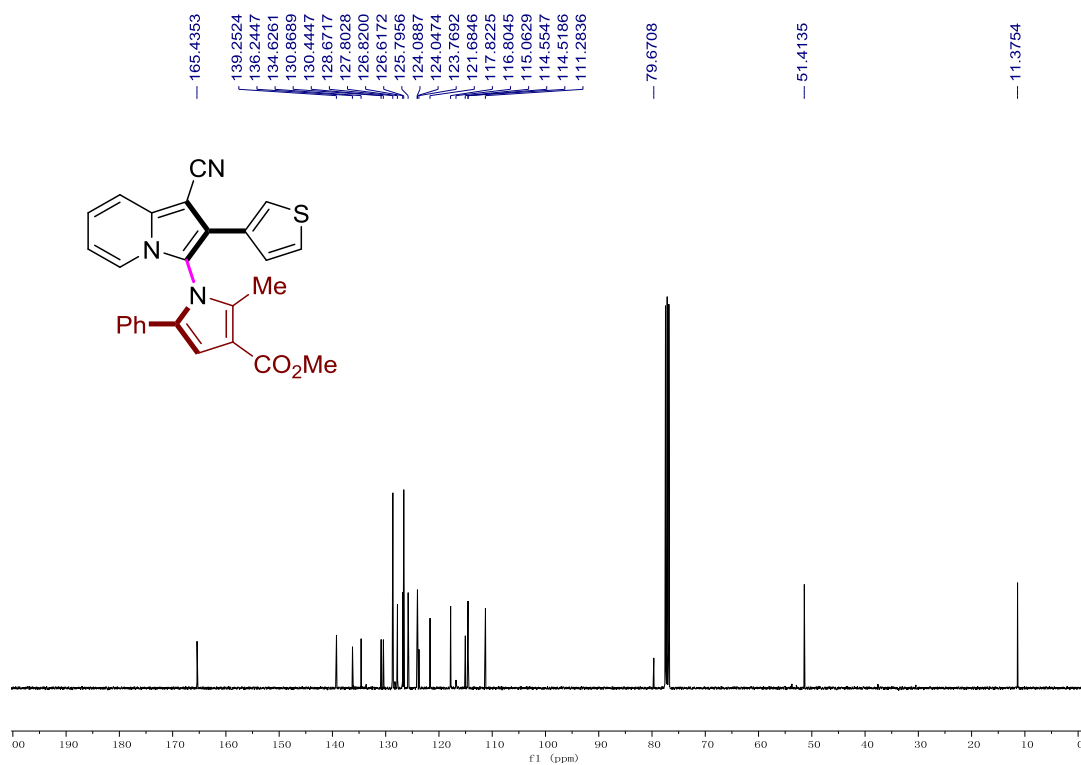

### HPLC analysis: rac-3q

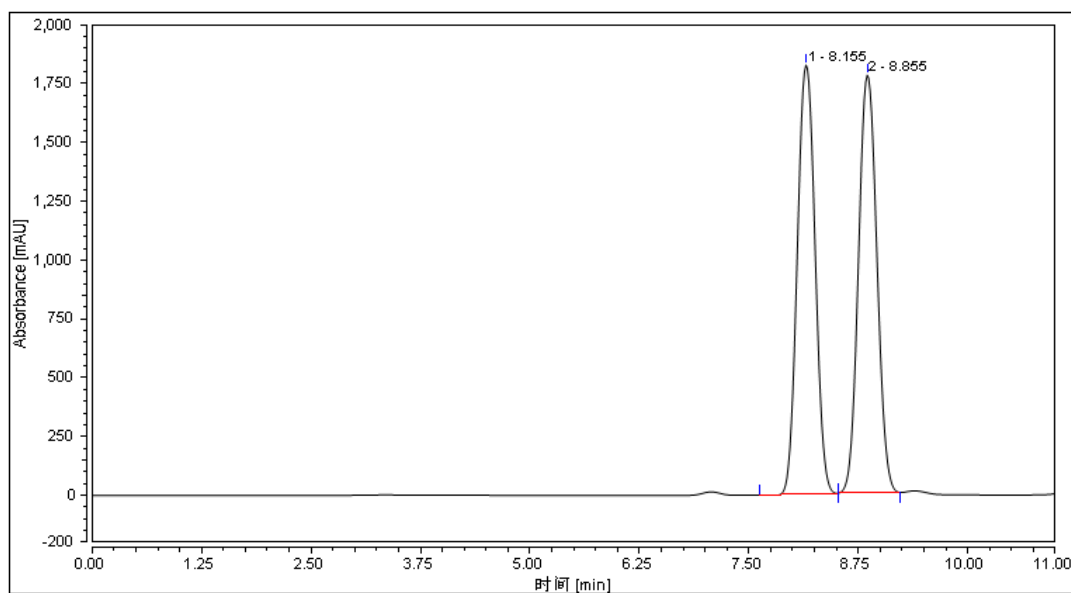

| Peak | RetTime<br>min | Area<br>mAU*min | Height<br>mAU | Area<br>% |
|------|----------------|-----------------|---------------|-----------|
| 1    | 8.155          | 428.061         | 1824.883      | 49.76     |
| 2    | 8.855          | 432.208         | 1777.057      | 50.24     |

### Enantioenriched 3q

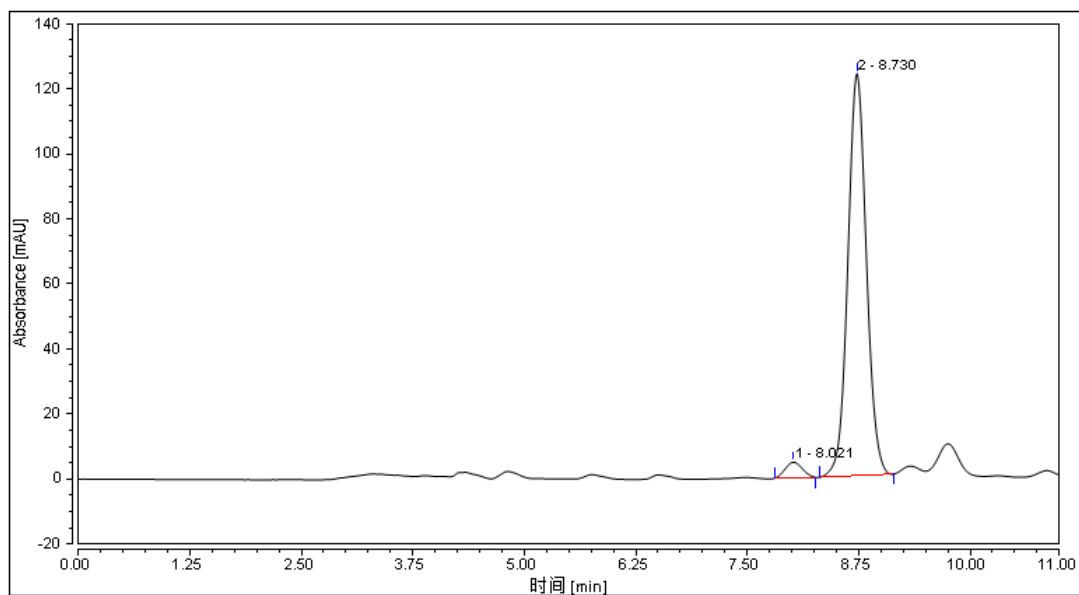

| Peak | RetTime<br>min | Area<br>mAU*min | Height<br>mAU | Area<br>% |
|------|----------------|-----------------|---------------|-----------|
| 1    | 8.021          | 1.065           | 4.803         | 3.46      |
| 2    | 8.730          | 29.710          | 123.735       | 96.54     |

<sup>1</sup>H NMR of **3r** (400 MHz, CDCl<sub>3</sub>)

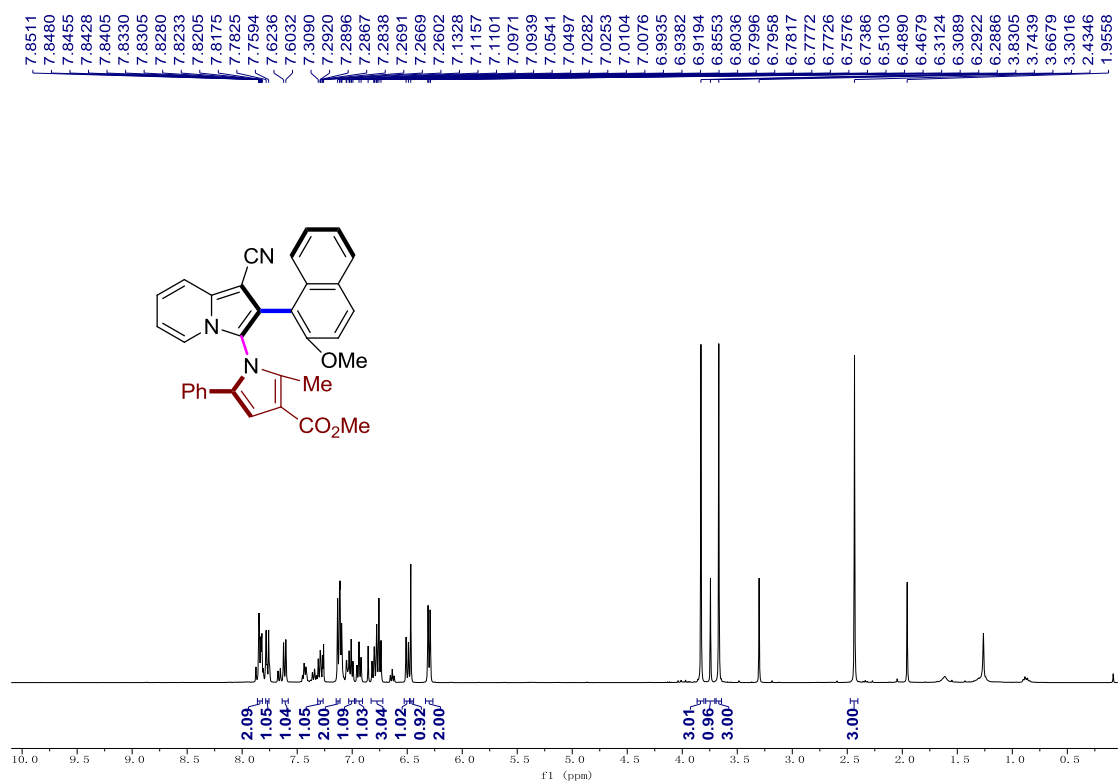

<sup>13</sup>C NMR of **3r** (100 MHz, CDCl<sub>3</sub>)

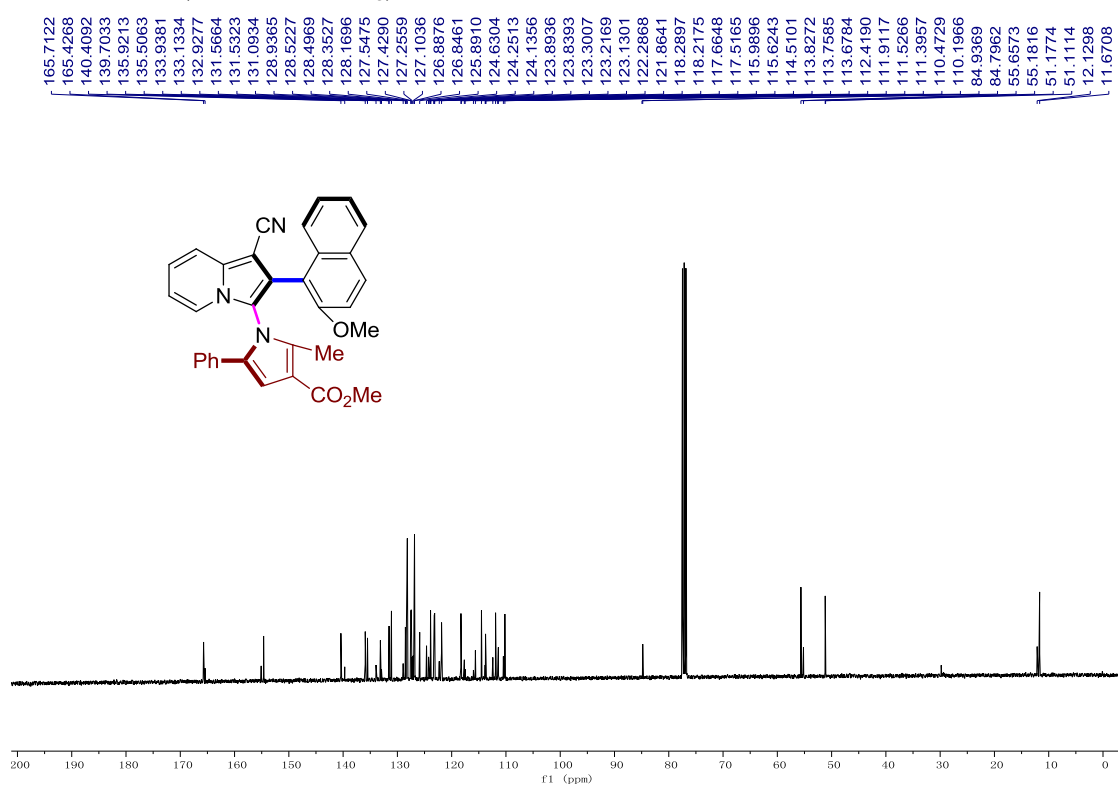

NOESY of **3r** (500 MHz, CDCl<sub>3</sub>)

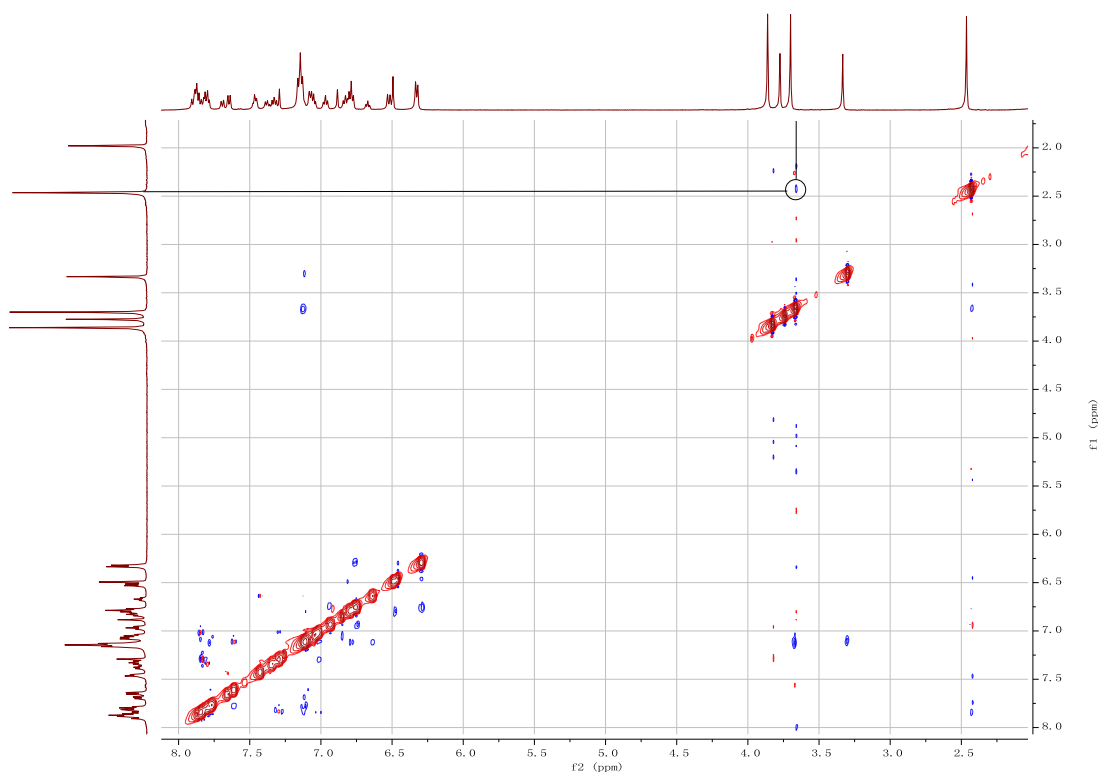



### HPLC analysis: rac-3r

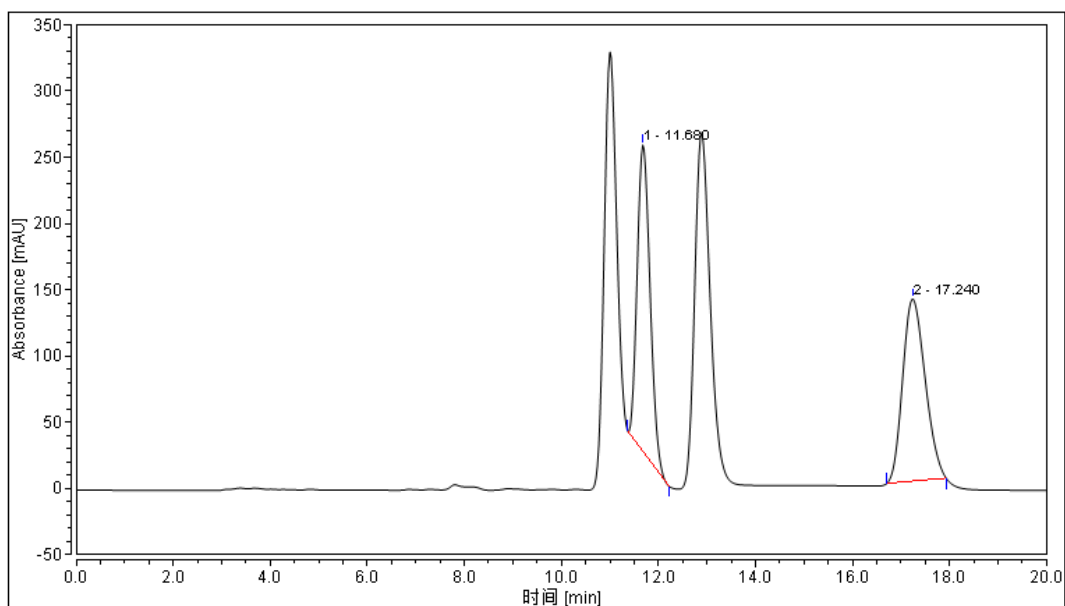

| Peak | RetTime<br>min | Area<br>mAU*min | Height<br>mAU | Area<br>% |
|------|----------------|-----------------|---------------|-----------|
| 1    | 11.680         | 70.910          | 231.737       | 50.66     |
| 2    | 17.240         | 69.054          | 131.538       | 49.34     |

### Enantioenriched 3r

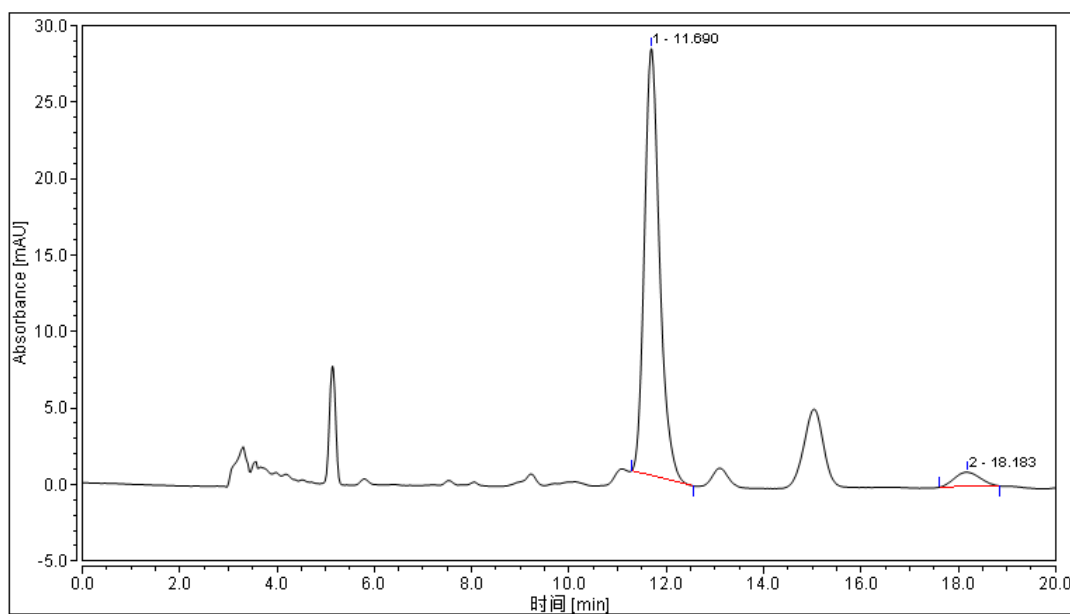

| Peak | RetTime<br>min | Area<br>mAU*min | Height<br>mAU | Area<br>% |
|------|----------------|-----------------|---------------|-----------|
| 1    | 11.690         | 10.098          | 27.910        | 94.59     |
| 2    | 18.183         | 0.578           | 0.951         | 5.41      |

<sup>1</sup>H NMR of 3s (400 MHz, CDCl<sub>3</sub>)

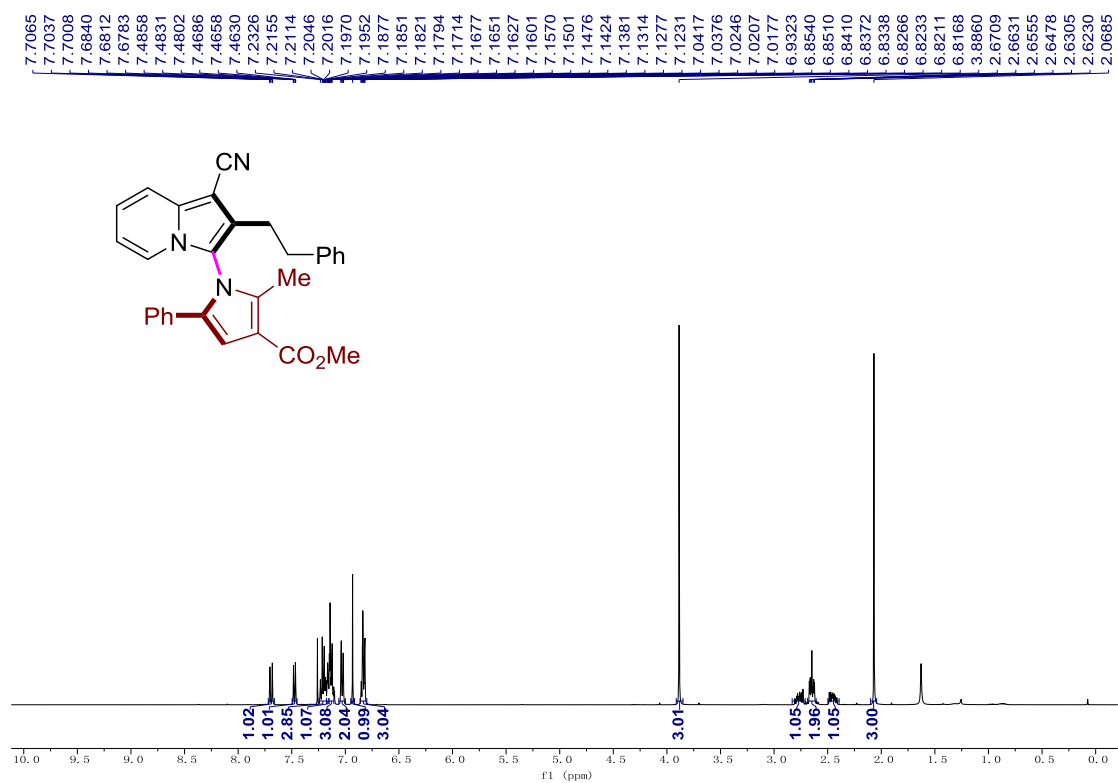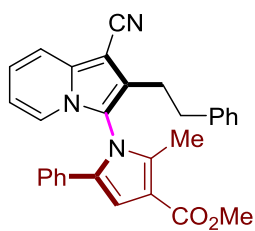

<sup>13</sup>C NMR of 3s (100 MHz, CDCl<sub>3</sub>)

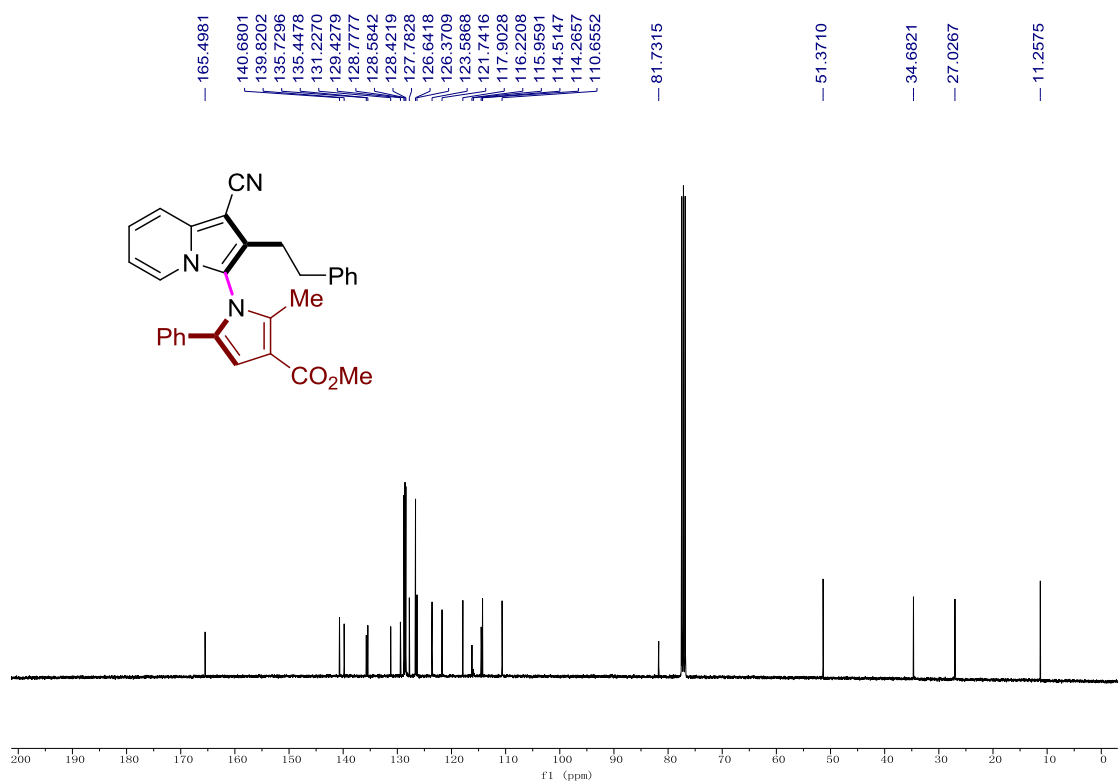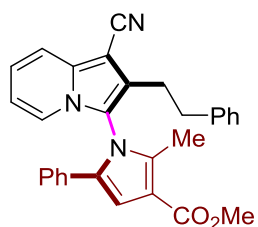

### HPLC analysis: rac-3s

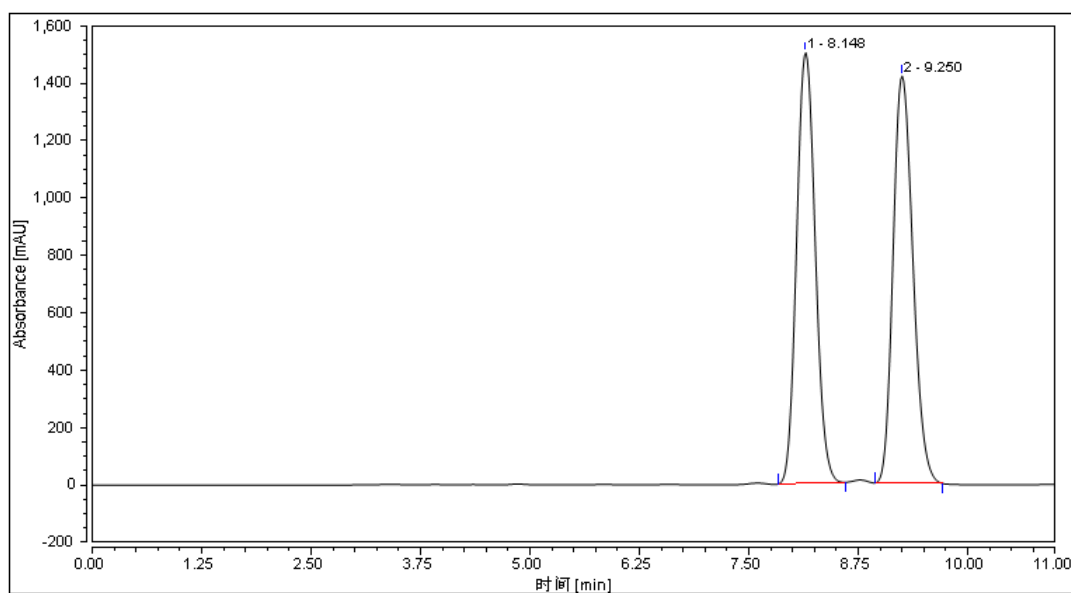

| Peak | RetTime<br>min | Area<br>mAU*min | Height<br>mAU | Area<br>% |
|------|----------------|-----------------|---------------|-----------|
| 1    | 8.148          | 369.777         | 1501.244      | 49.86     |
| 2    | 9.250          | 371.805         | 1419.169      | 50.14     |

### Enantioenriched 3s

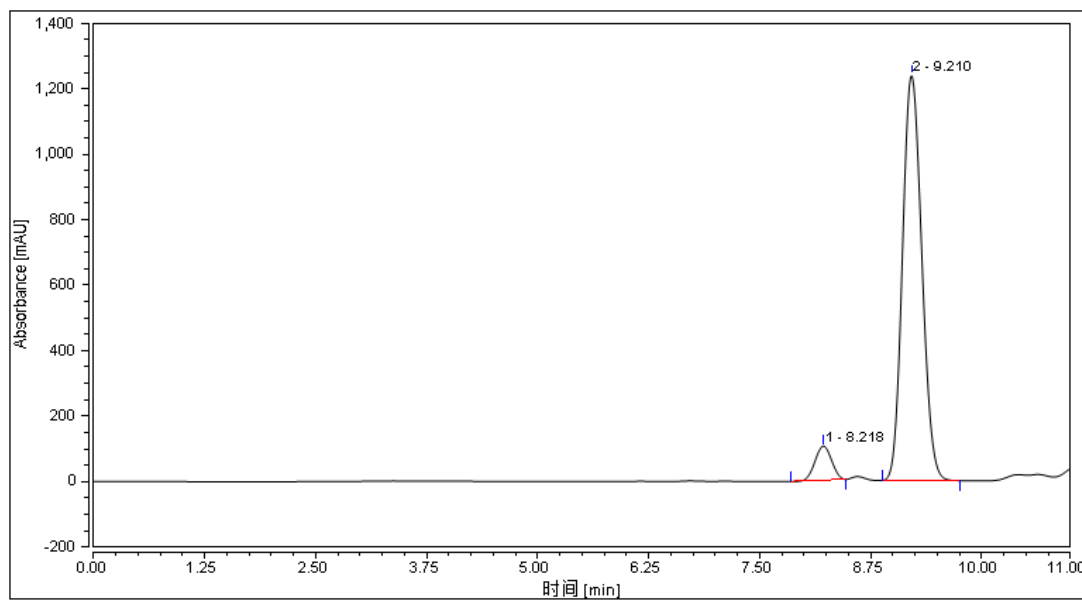

| Peak | RetTime<br>min | Area<br>mAU*min | Height<br>mAU | Area<br>% |
|------|----------------|-----------------|---------------|-----------|
| 1    | 8.218          | 22.539          | 104.449       | 6.75      |
| 2    | 9.210          | 311.307         | 1238.902      | 93.25     |

<sup>1</sup>H NMR of **3t** (400 MHz, CDCl<sub>3</sub>)

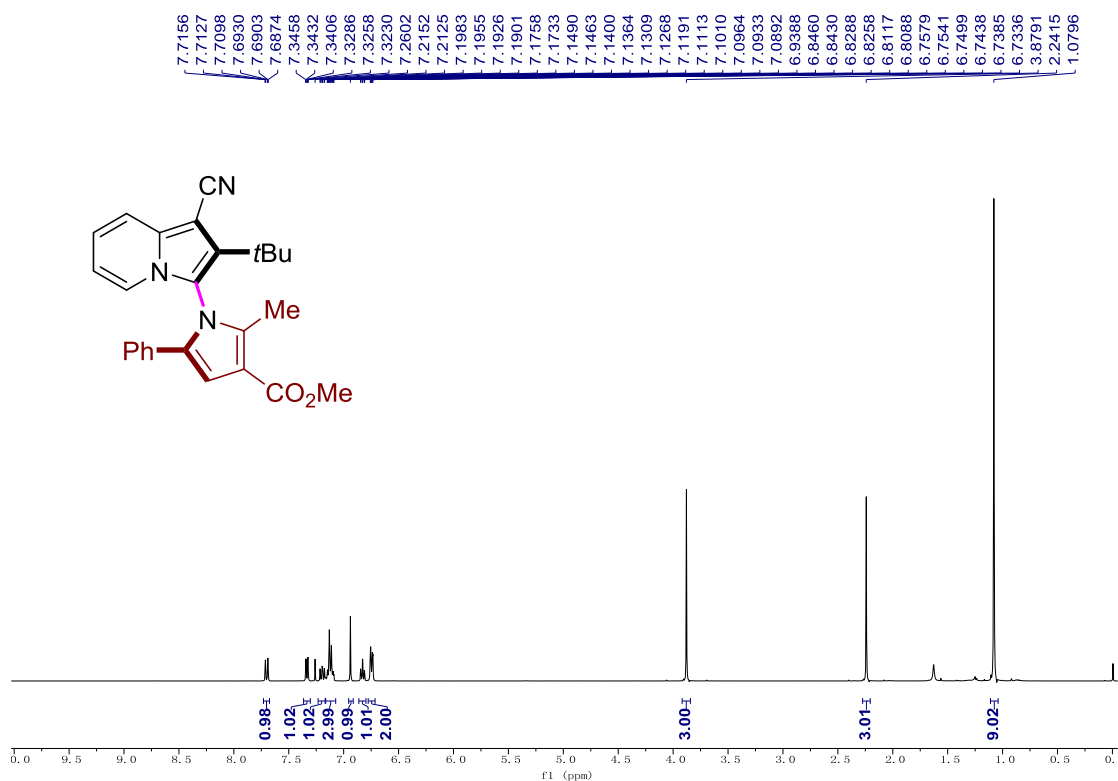

<sup>13</sup>C NMR of **3t** (100 MHz, CDCl<sub>3</sub>)

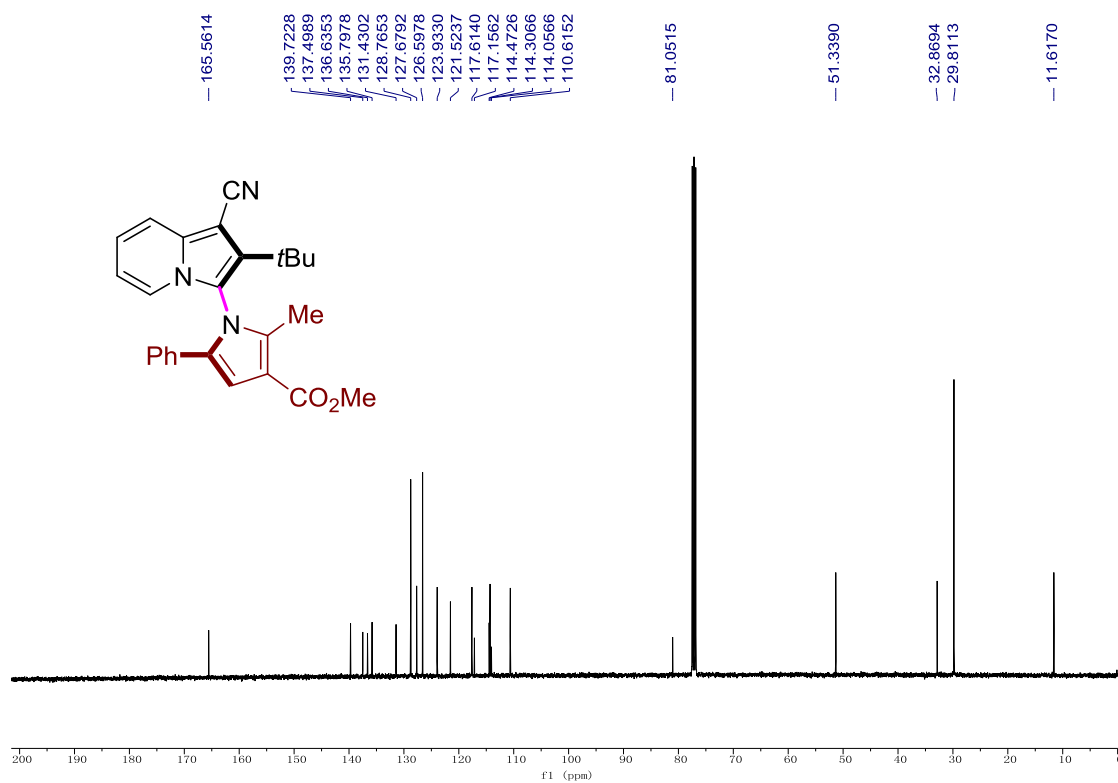

### HPLC analysis: rac-3t

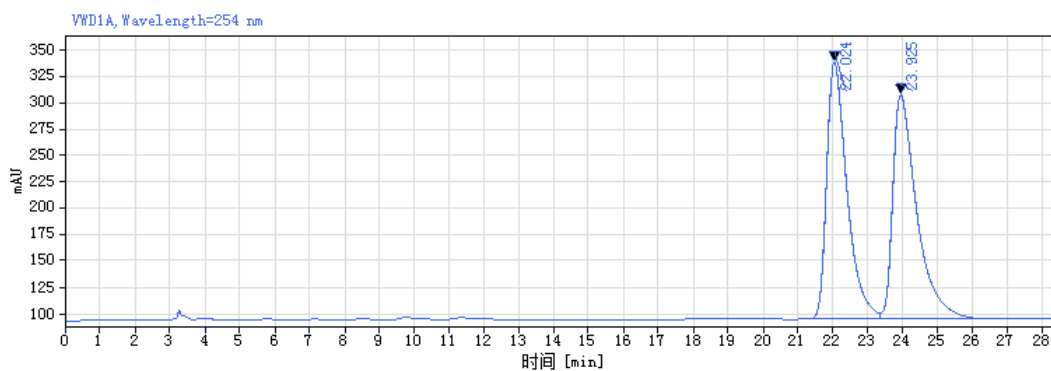

| Peak | RetTime<br>min | Area<br>mAU*min | Height<br>mAU | Area<br>% |
|------|----------------|-----------------|---------------|-----------|
| 1    | 22.024         | 9859.83         | 242.85        | 49.34     |
| 2    | 23.925         | 10121.8         | 212.14        | 50.66     |

### Enantioenriched 3t

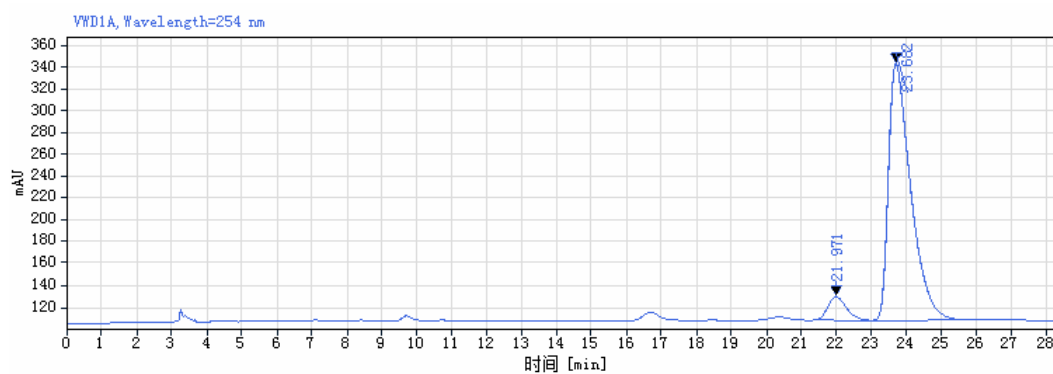

| Peak | RetTime<br>min | Area<br>mAU*min | Height<br>mAU | Area<br>% |
|------|----------------|-----------------|---------------|-----------|
| 1    | 21.971         | 792.44          | 21.48         | 7.06      |
| 2    | 23.682         | 10431.43        | 235.21        | 92.94     |

<sup>1</sup>H NMR of **3u** (400 MHz, CDCl<sub>3</sub>)

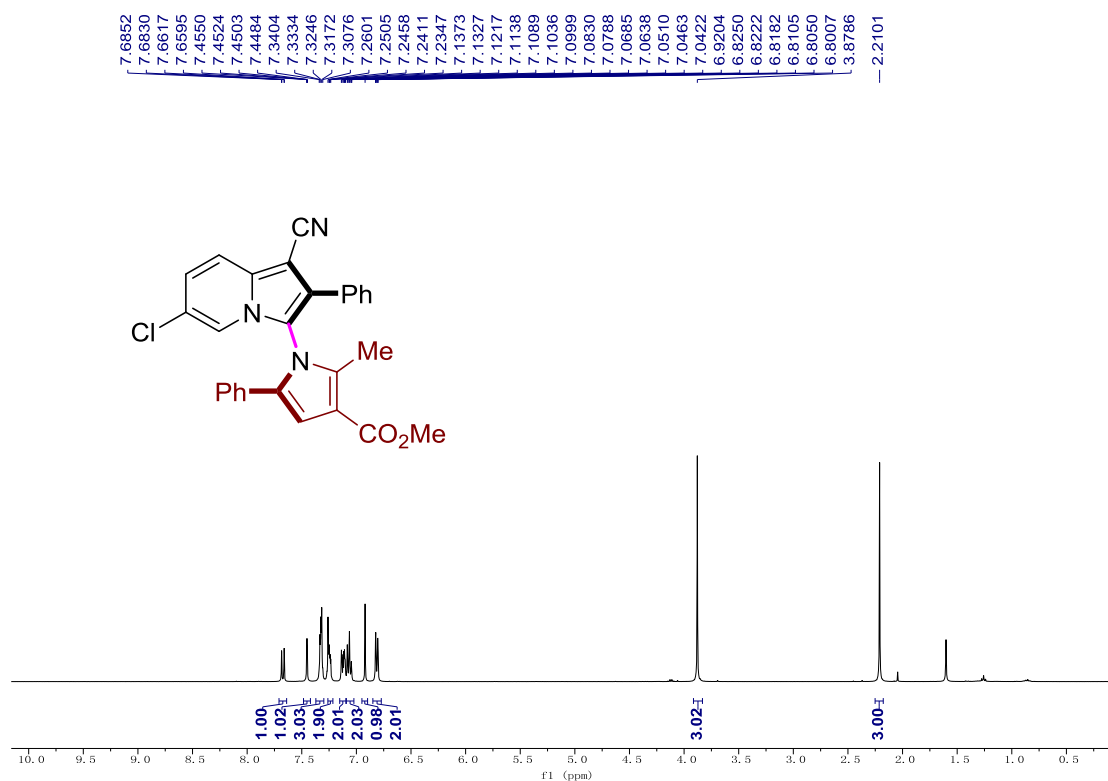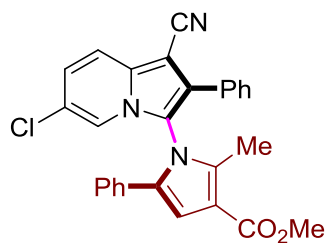

<sup>13</sup>C NMR of **3u** (100 MHz, CDCl<sub>3</sub>)

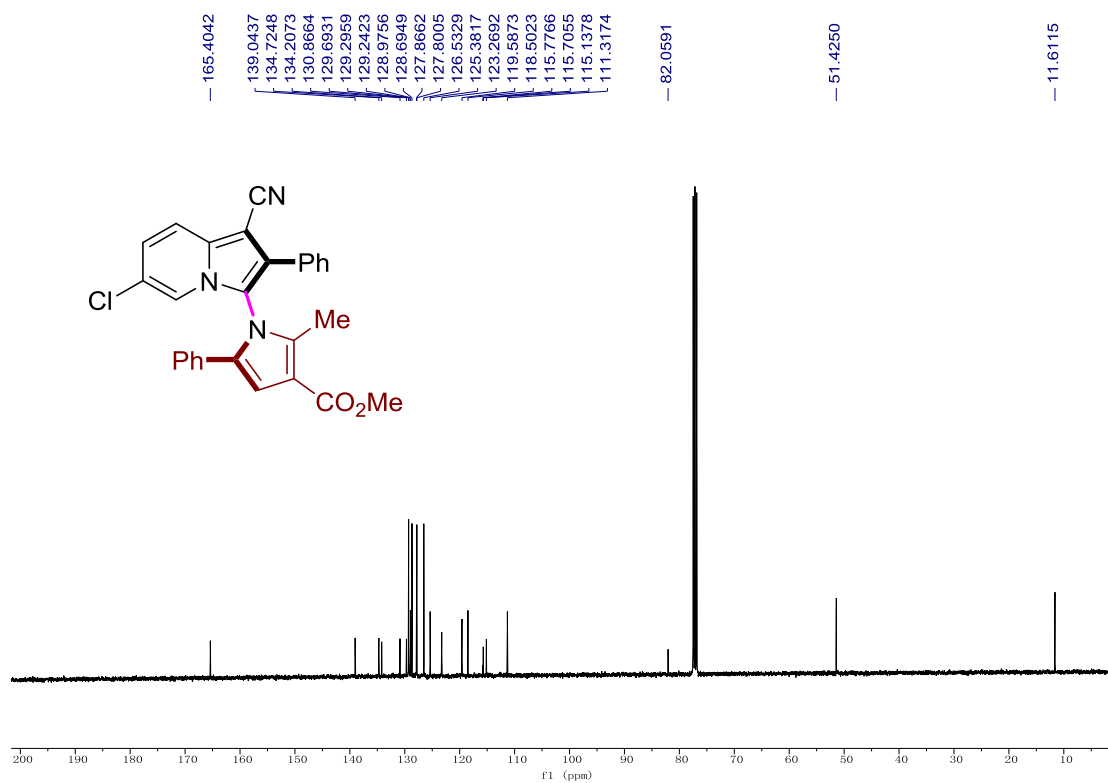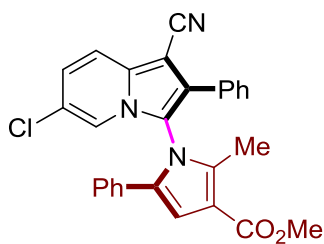

### HPLC analysis: rac-3u

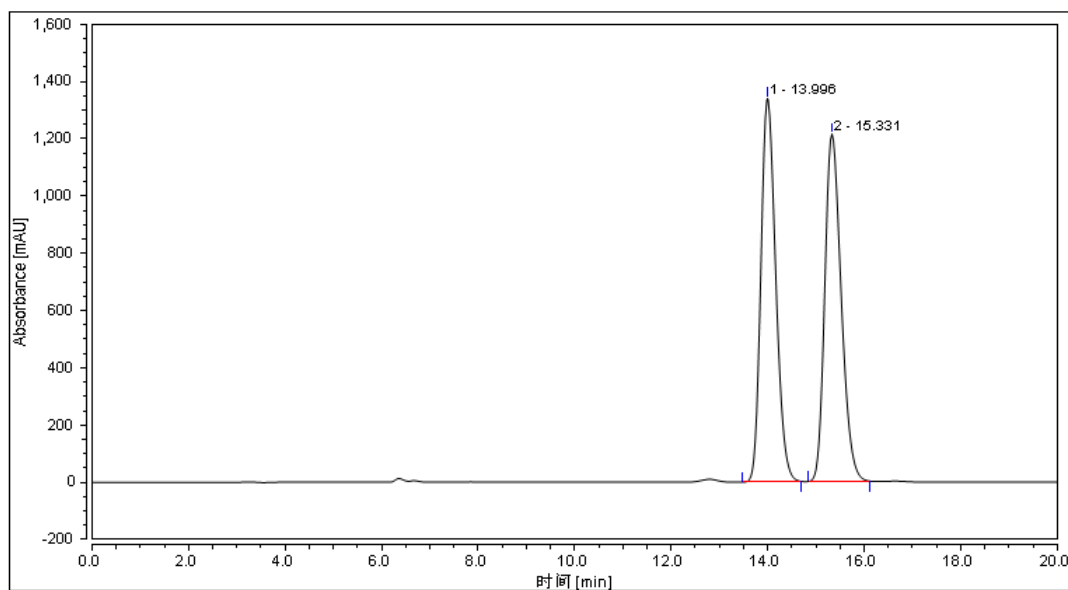

| Peak | RetTime<br>min | Area<br>mAU*min | Height<br>mAU | Area<br>% |
|------|----------------|-----------------|---------------|-----------|
| 1    | 13.996         | 476.066         | 1338.962      | 50.01     |
| 2    | 15.331         | 475.805         | 1213.238      | 49.99     |

### Enantioenriched 3u

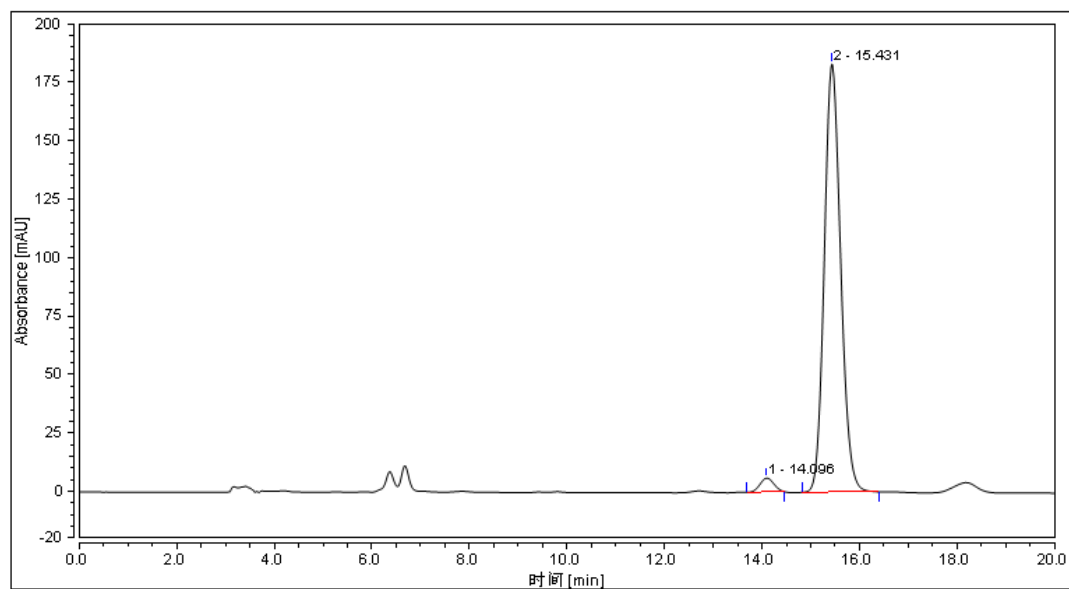

| Peak | RetTime<br>min | Area<br>mAU*min | Height<br>mAU | Area<br>% |
|------|----------------|-----------------|---------------|-----------|
| 1    | 14.096         | 1.984           | 6.006         | 2.71      |
| 2    | 15.431         | 71.267          | 183.168       | 97.29     |

<sup>1</sup>H NMR of **3v** (400 MHz, CDCl<sub>3</sub>)

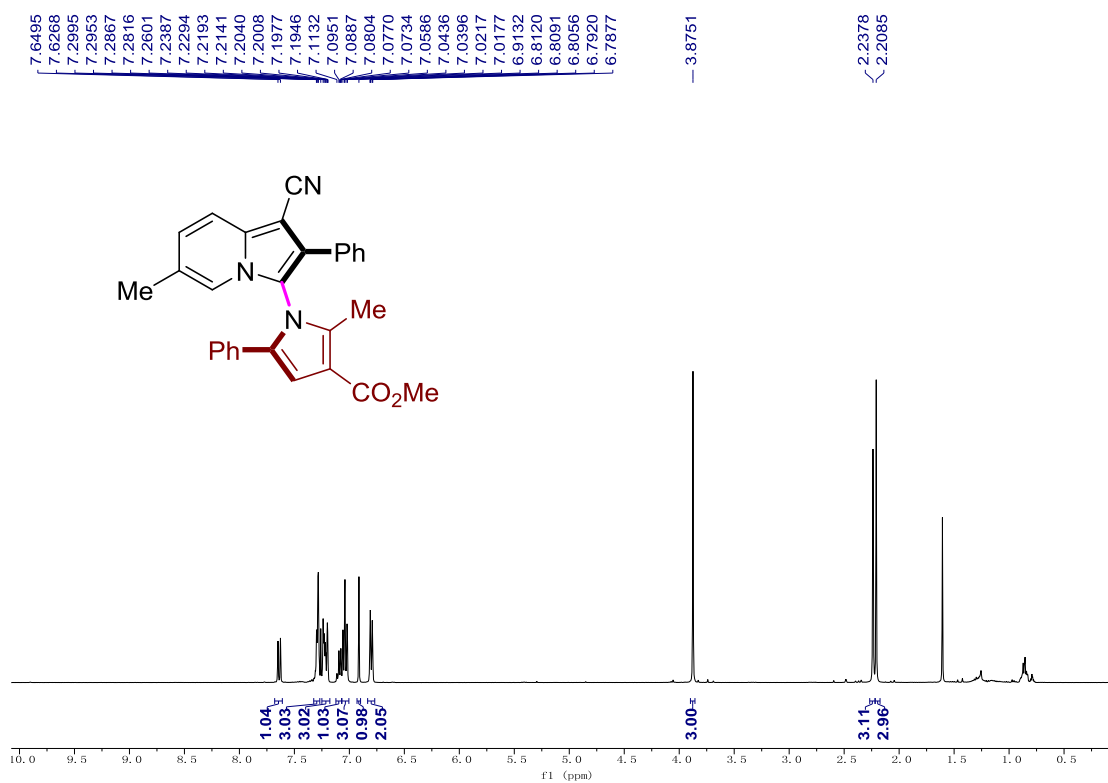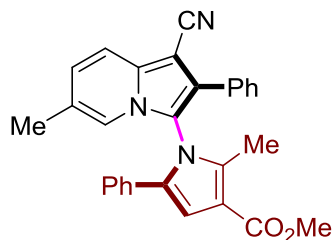

<sup>13</sup>C NMR of **3v** (100 MHz, CDCl<sub>3</sub>)

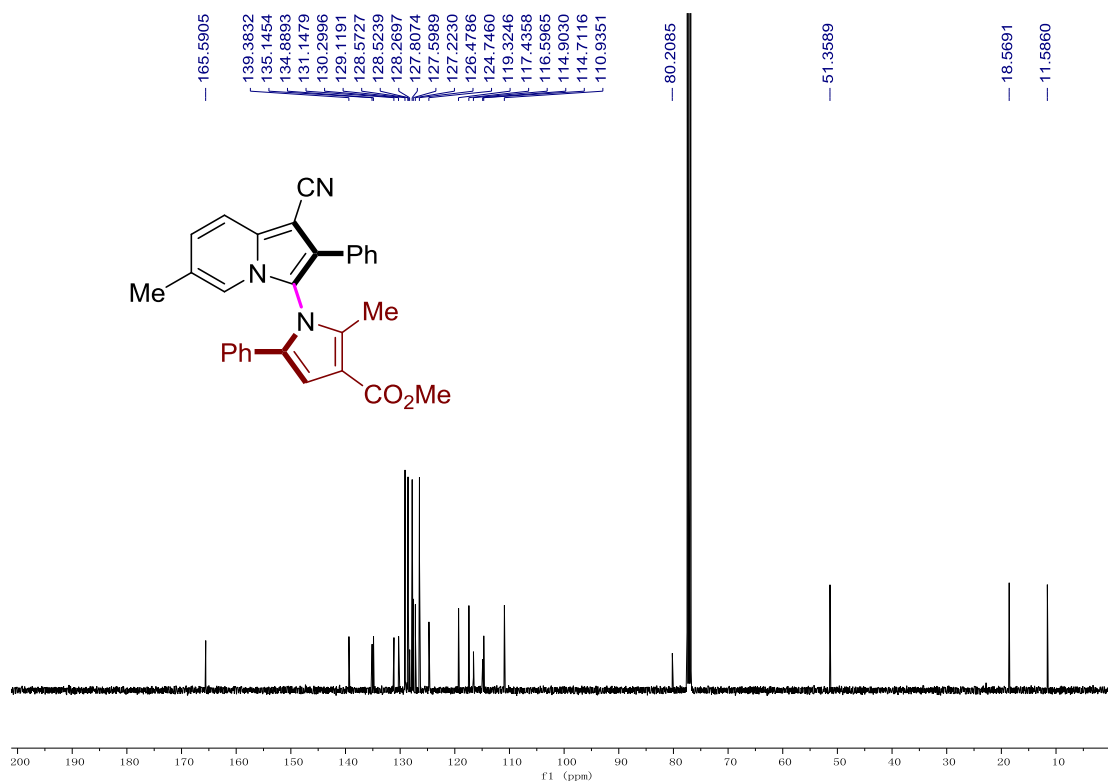



### HPLC analysis: rac-3v

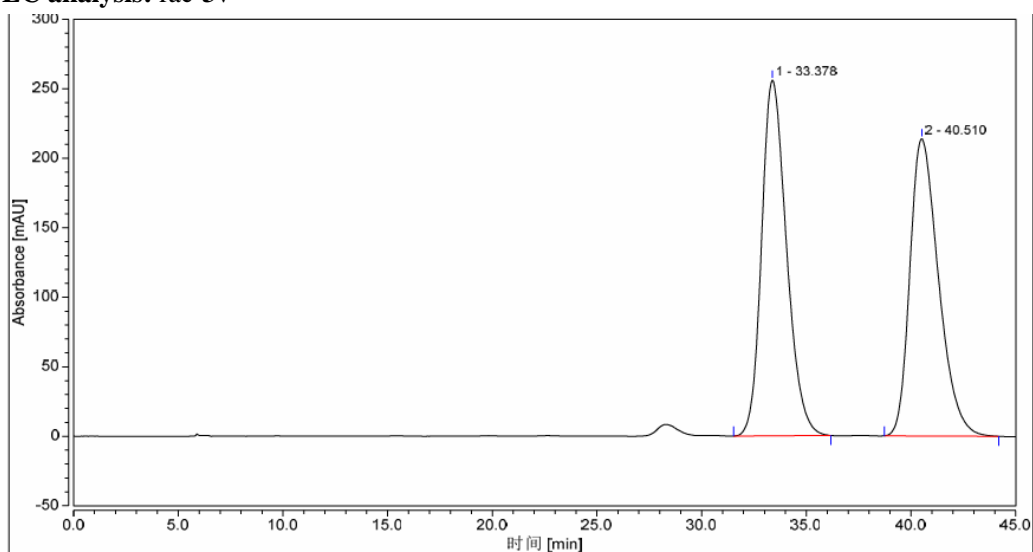

| Peak | RetTime<br>min | Area<br>mAU*min | Height<br>mAU | Area<br>% |
|------|----------------|-----------------|---------------|-----------|
| 1    | 33.378         | 352.881         | 256.016       | 50.96     |
| 2    | 40.510         | 339.590         | 213.922       | 49.04     |

### Enantioenriched 3v

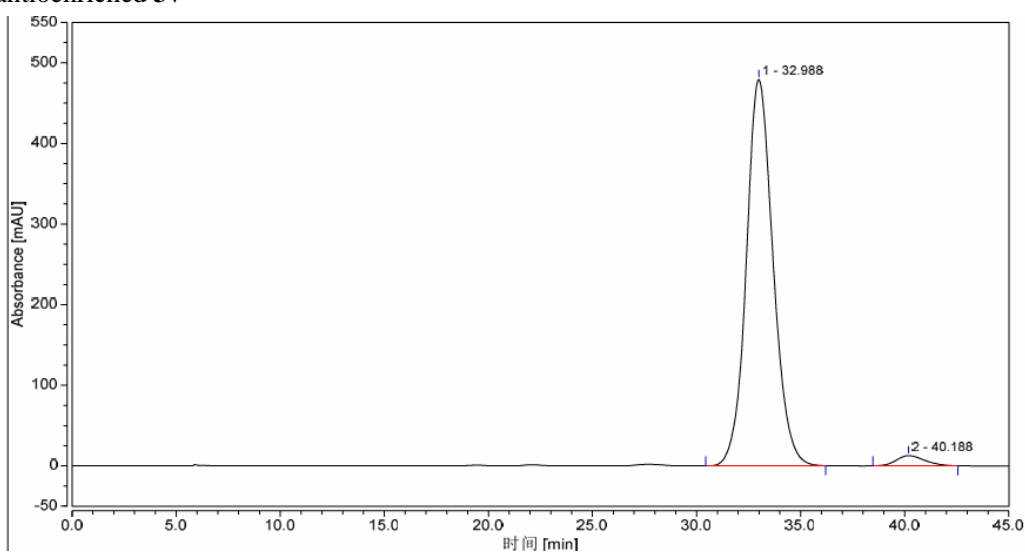

| Peak | RetTime<br>min | Area<br>mAU*min | Height<br>mAU | Area<br>% |
|------|----------------|-----------------|---------------|-----------|
| 1    | 32.988         | 708.650         | 478.541       | 97.18     |
| 2    | 40.188         | 20.544          | 12.689        | 2.82      |

<sup>1</sup>H NMR of **3w** (400 MHz, CDCl<sub>3</sub>)

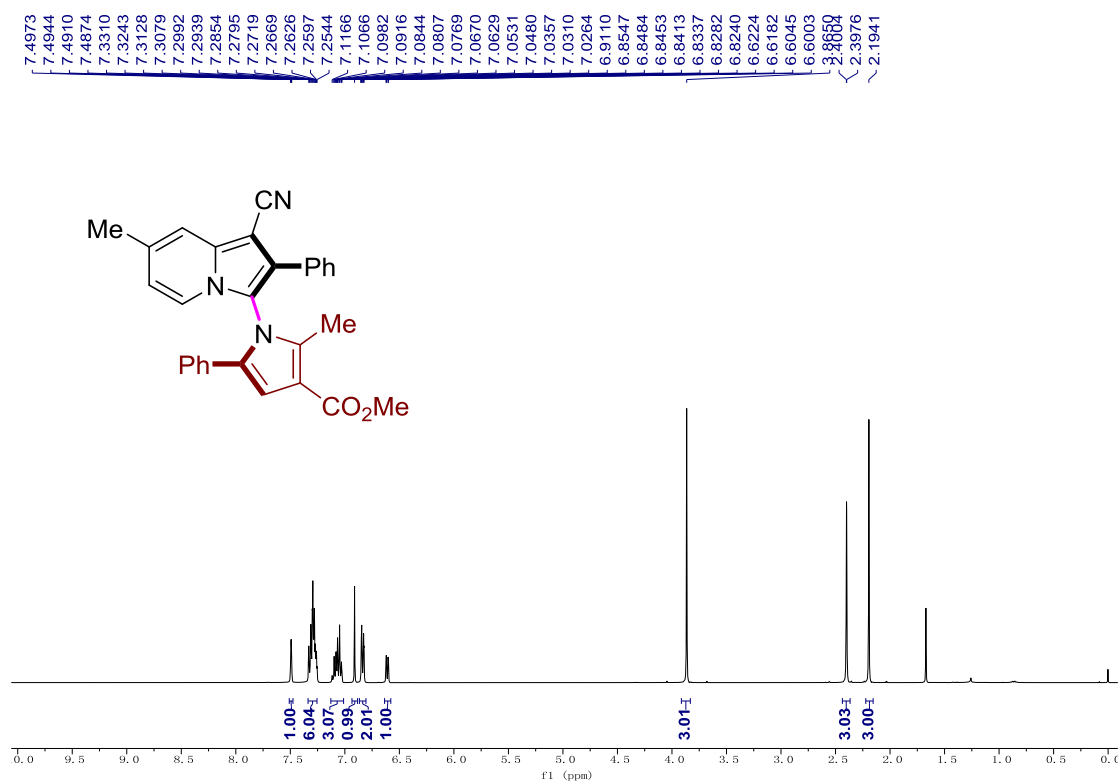

<sup>13</sup>C NMR of **3w** (100 MHz, CDCl<sub>3</sub>)

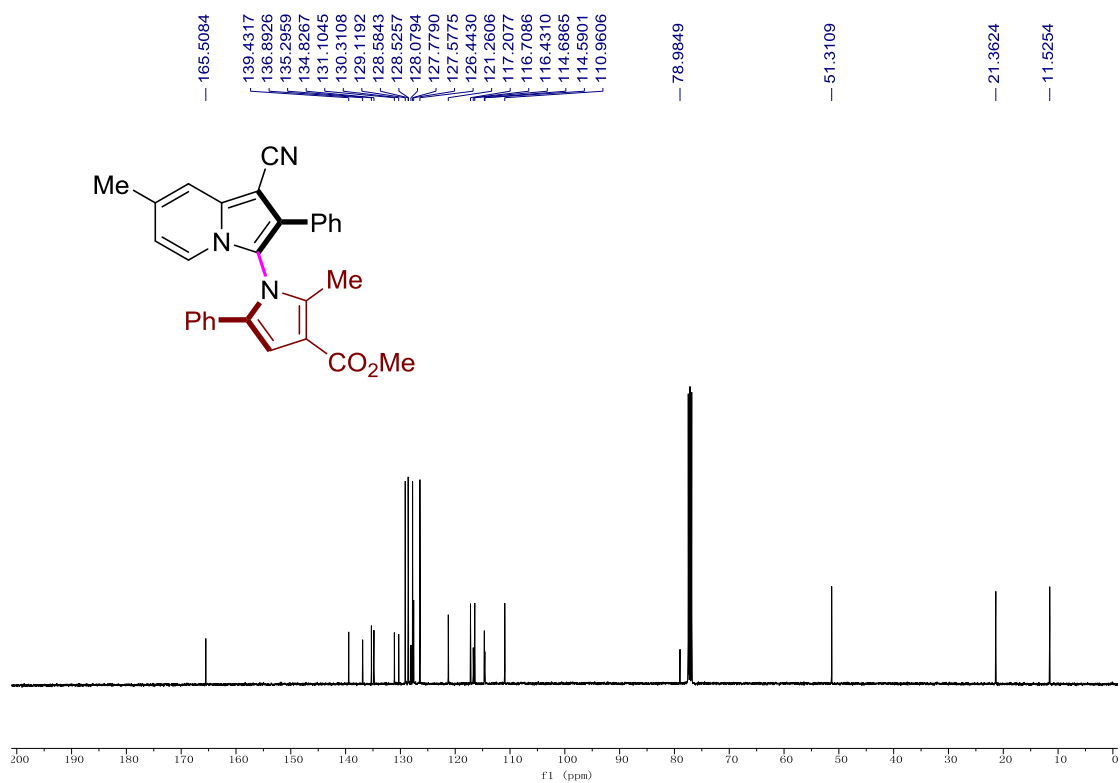

### HPLC analysis: rac-3w

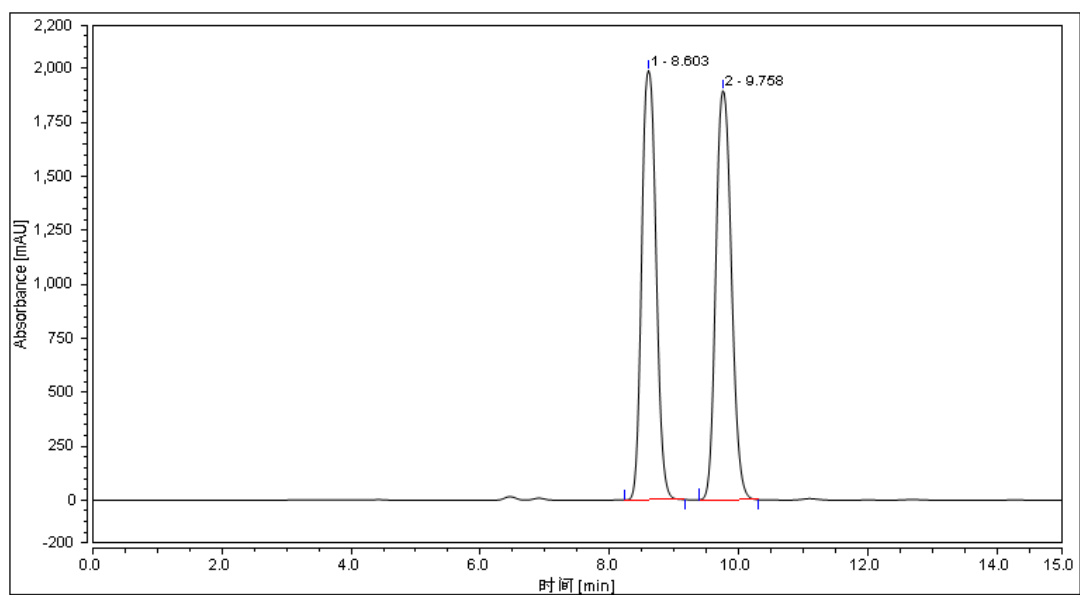

| Peak | RetTime<br>min | Area<br>mAU*min | Height<br>mAU | Area<br>% |
|------|----------------|-----------------|---------------|-----------|
| 1    | 8.603          | 512.052         | 1989.567      | 49.10     |
| 2    | 9.758          | 530.742         | 1897.058      | 50.90     |

### Enantioenriched 3w

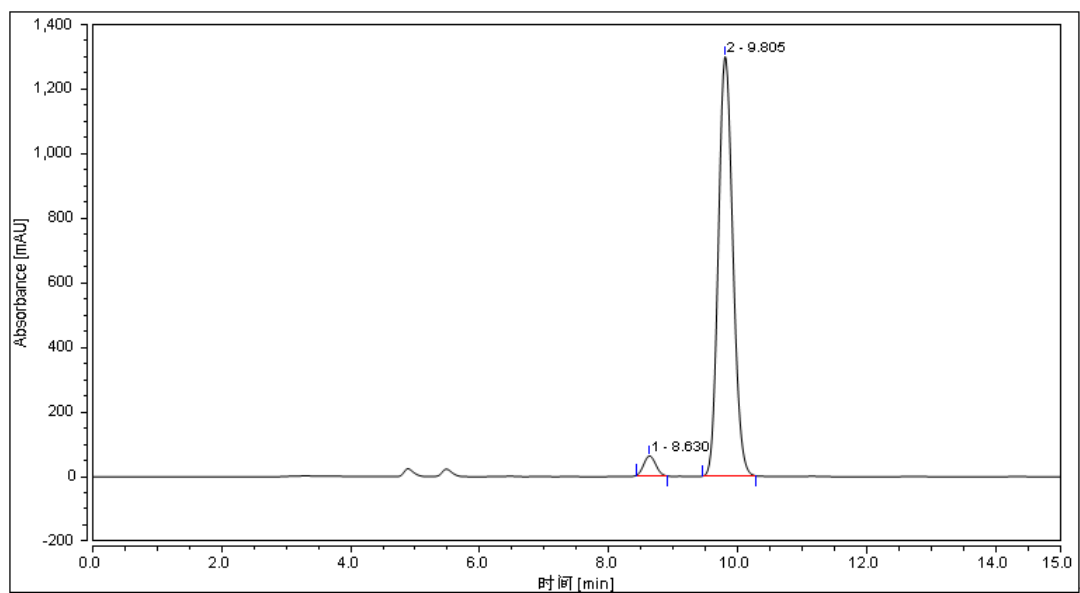

| Peak | RetTime<br>min | Area<br>mAU*min | Height<br>mAU | Area<br>% |
|------|----------------|-----------------|---------------|-----------|
| 1    | 8.630          | 13.026          | 61.246        | 3.71      |
| 2    | 9.805          | 338.524         | 1298.134      | 96.29     |

<sup>1</sup>H NMR of **3x** (400 MHz, CDCl<sub>3</sub>)

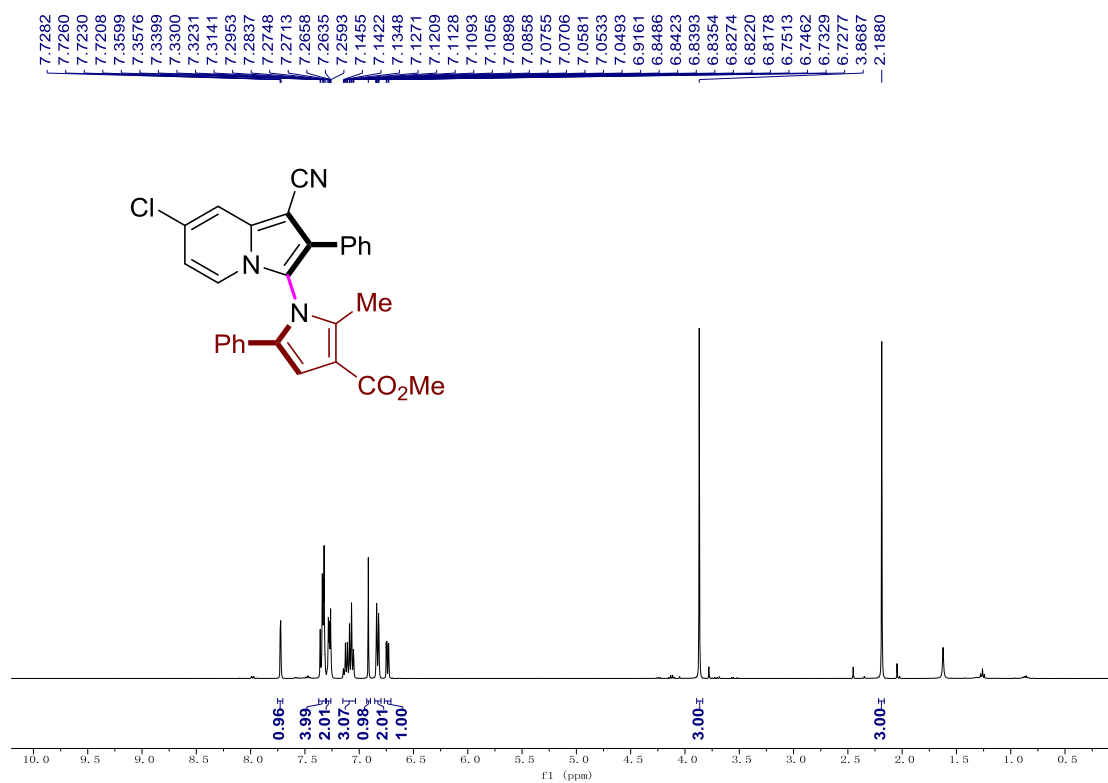

<sup>13</sup>C NMR of **3x** (100 MHz, CDCl<sub>3</sub>)

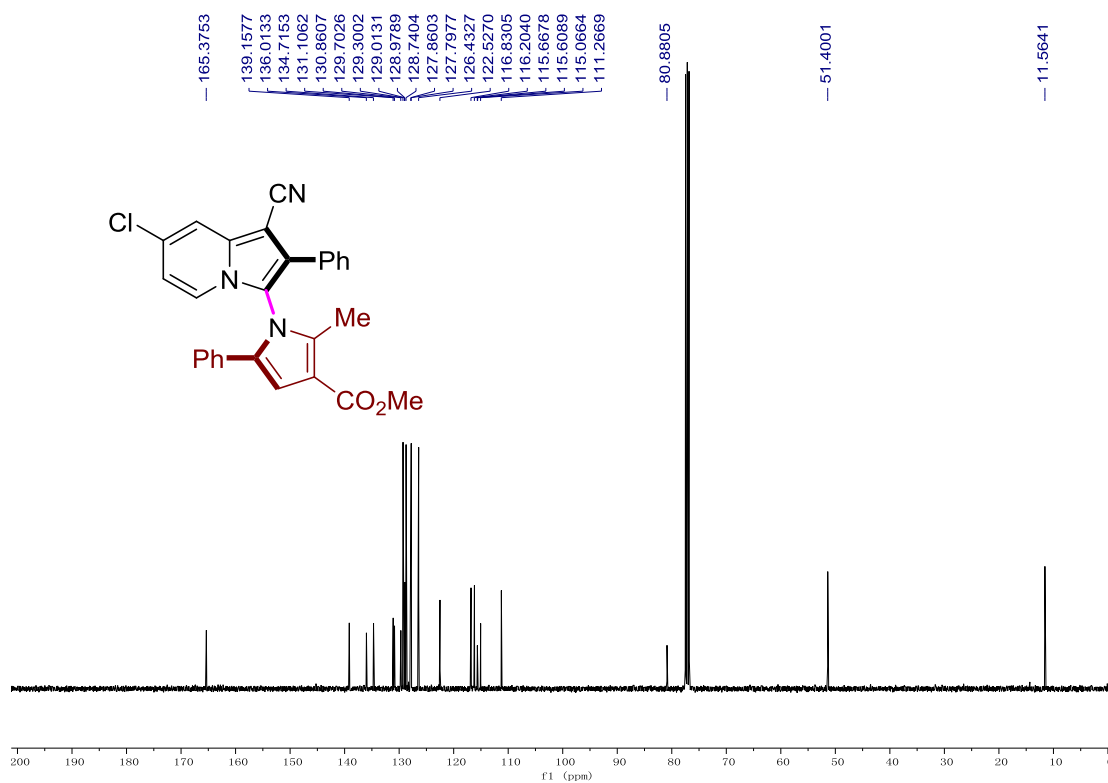

### HPLC analysis: rac-3x

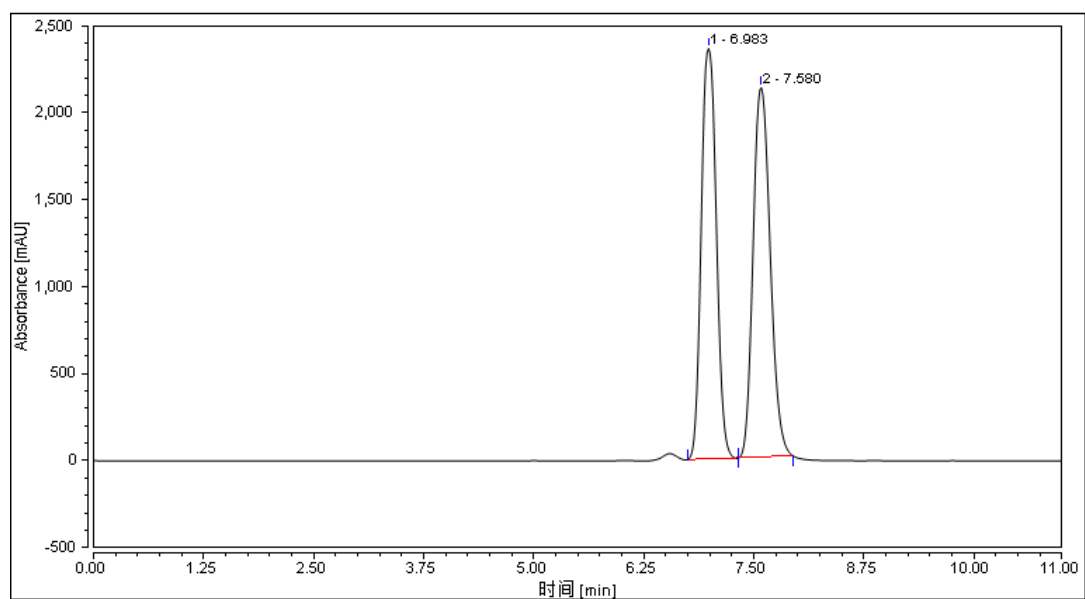

| Peak | RetTime<br>min | Area<br>mAU*min | Height<br>mAU | Area<br>% |
|------|----------------|-----------------|---------------|-----------|
| 1    | 6.983          | 466.608         | 2360.957      | 49.31     |
| 2    | 7.580          | 479.629         | 2126.426      | 50.69     |

### Enantioenriched 3x

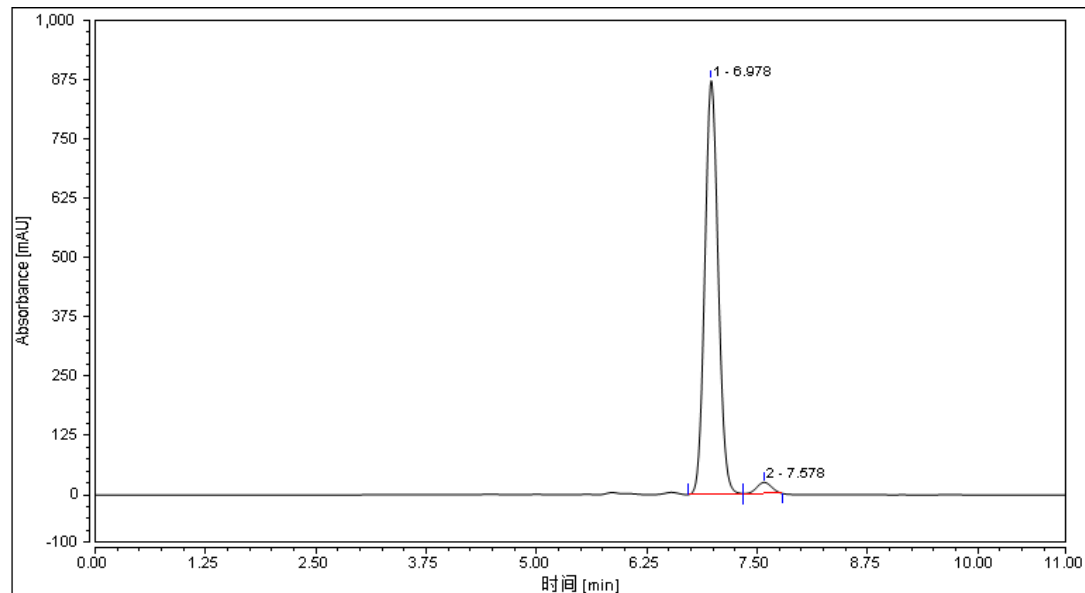

| Peak | RetTime<br>min | Area<br>mAU*min | Height<br>mAU | Area<br>% |
|------|----------------|-----------------|---------------|-----------|
| 1    | 6.970          | 139.973         | 783.087       | 96.89     |
| 2    | 7.568          | 4.499           | 22.315        | 3.11      |

<sup>1</sup>H NMR of **3y** (400 MHz, CDCl<sub>3</sub>)

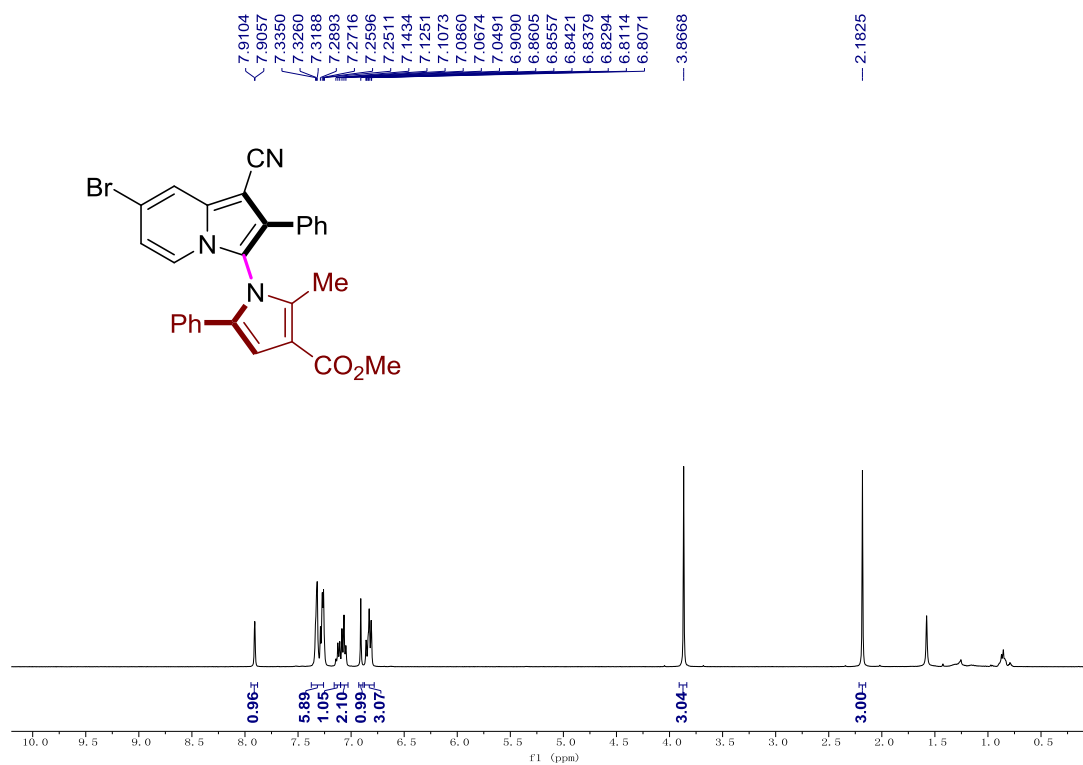

<sup>13</sup>C NMR of **3y** (100 MHz, CDCl<sub>3</sub>)

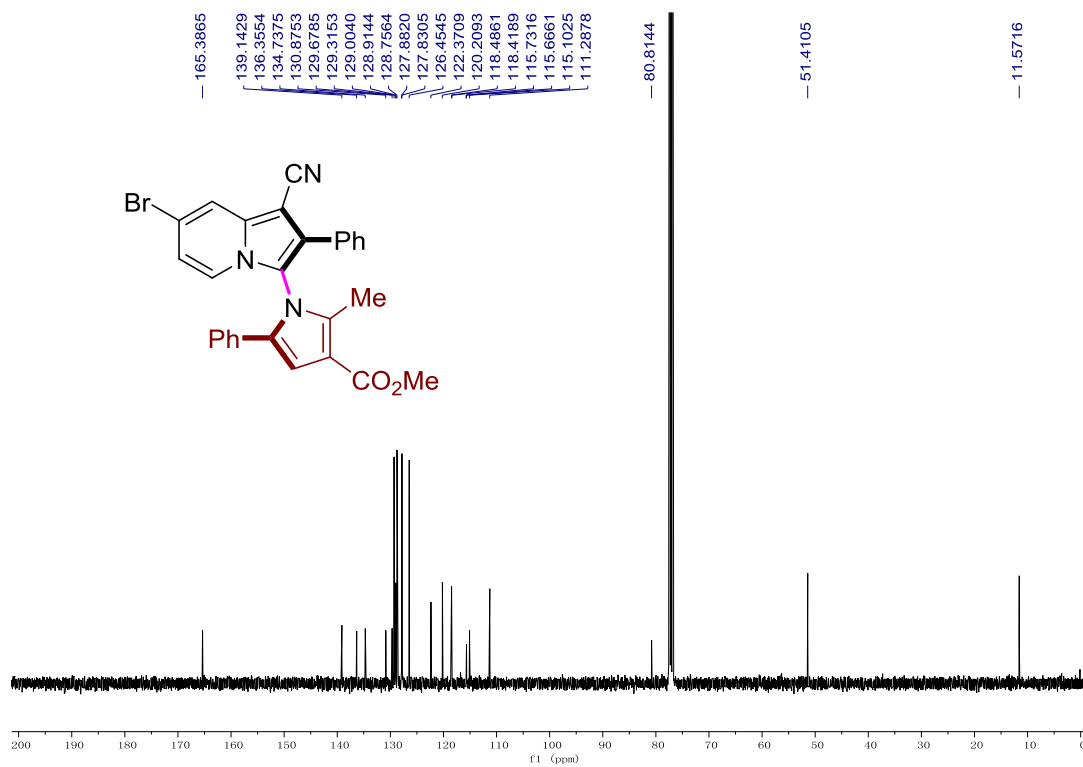

### HPLC analysis: rac-3y

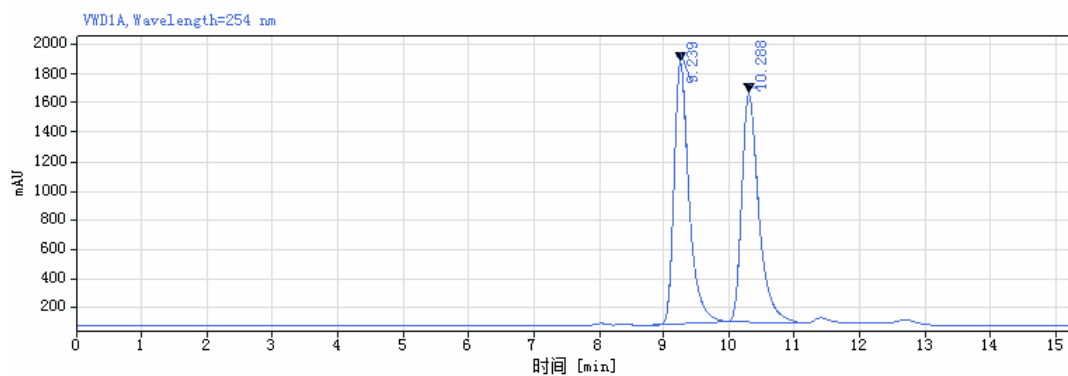

| Peak | RetTime<br>min | Area<br>mAU*min | Height<br>mAU | Area<br>% |
|------|----------------|-----------------|---------------|-----------|
| 1    | 9.239          | 28383.95        | 1782.35       | 50.1      |
| 2    | 10.288         | 28267.77        | 1577.01       | 49.9      |

### Enantioenriched 3y

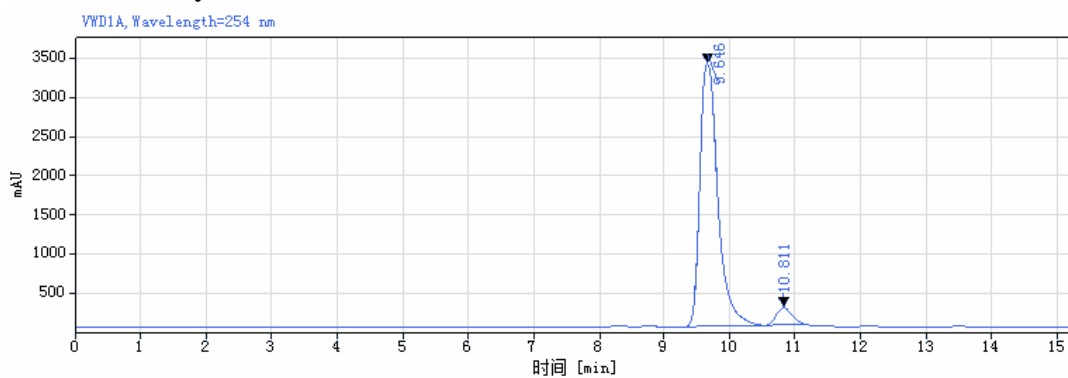

| Peak | RetTime<br>min | Area<br>mAU*min | Height<br>mAU | Area<br>% |
|------|----------------|-----------------|---------------|-----------|
| 1    | 9.646          | 63635.68        | 3343.04       | 94.7      |
| 2    | 10.811         | 3562.61         | 214.95        | 5.3       |

<sup>1</sup>H NMR of **3z** (400 MHz, CDCl<sub>3</sub>)

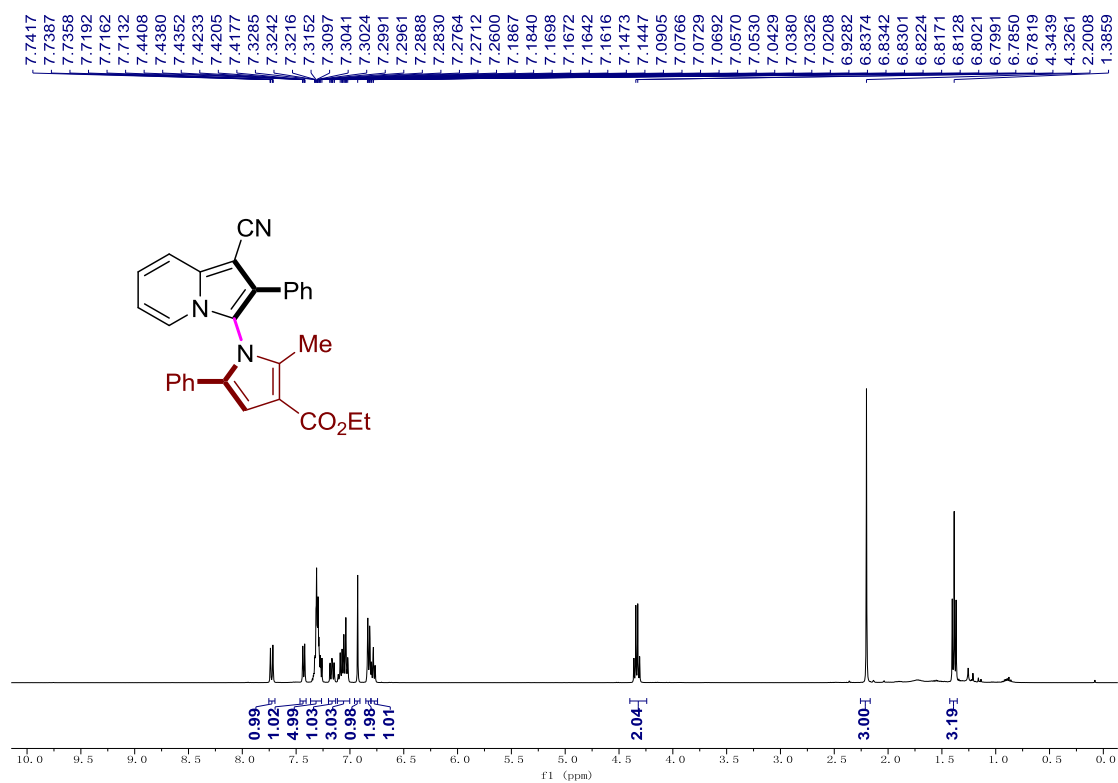

<sup>13</sup>C NMR of **3z** (100 MHz, CDCl<sub>3</sub>)

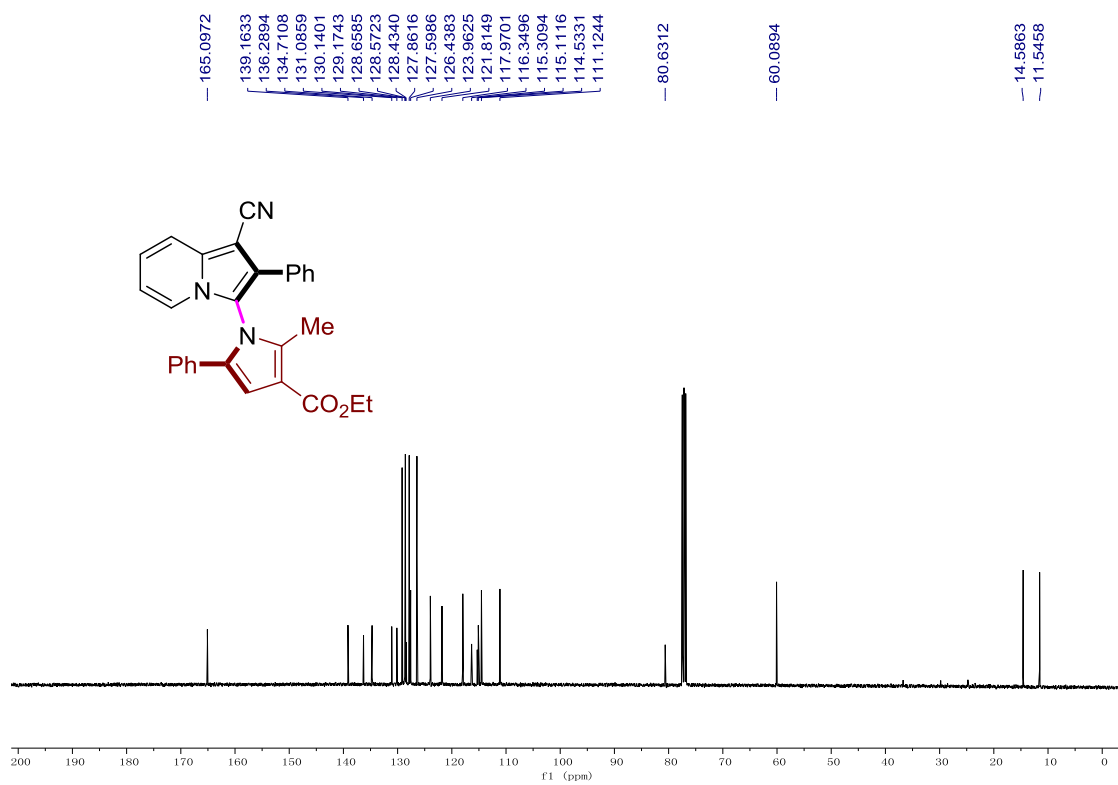



### HPLC analysis: rac-3z

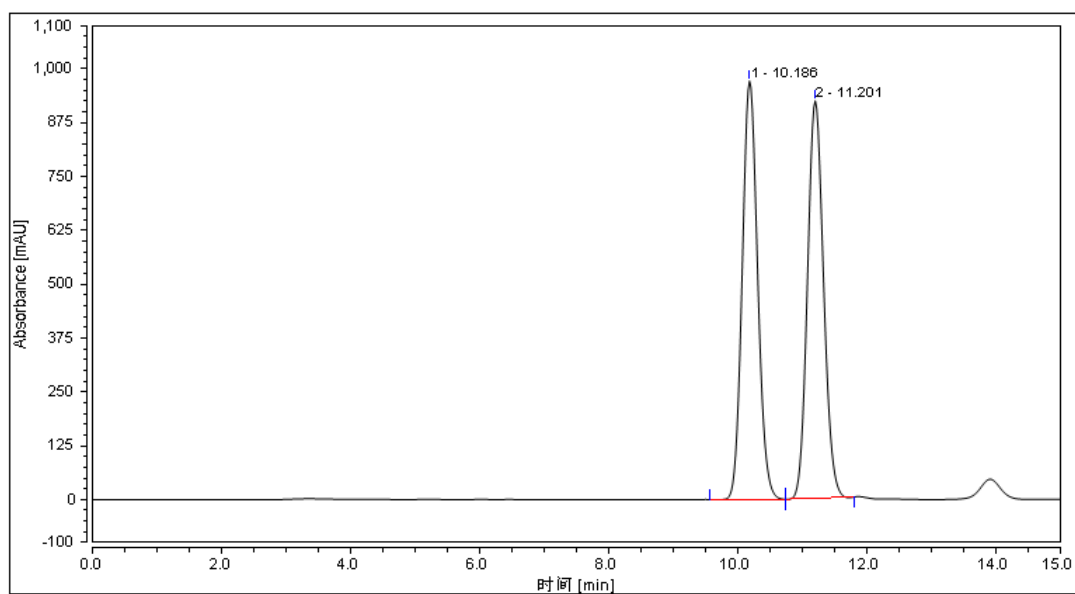

| Peak | RetTime<br>min | Area<br>mAU*min | Height<br>mAU | Area<br>% |
|------|----------------|-----------------|---------------|-----------|
| 1    | 10.186         | 268.003         | 971.689       | 50.19     |
| 2    | 11.201         | 265.932         | 922.788       | 49.81     |

### Enantioenriched 3z

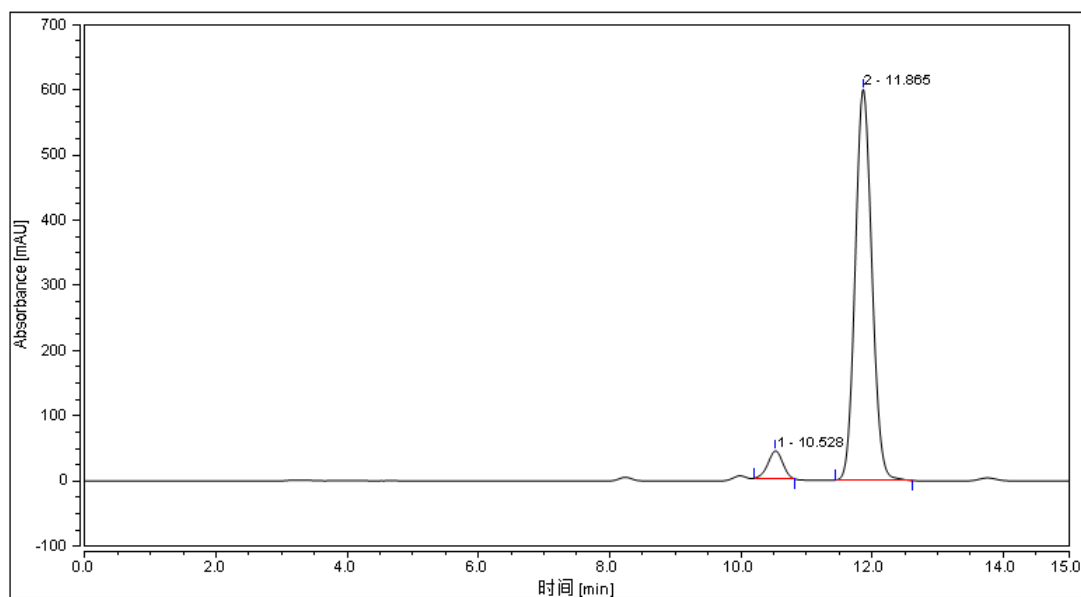

| Peak | RetTime<br>min | Area<br>mAU*min | Height<br>mAU | Area<br>% |
|------|----------------|-----------------|---------------|-----------|
| 1    | 10.528         | 11.119          | 42.432        | 5.92      |
| 2    | 11.865         | 176.670         | 599.539       | 94.08     |

<sup>1</sup>H NMR of **3aa** (400 MHz, CDCl<sub>3</sub>)

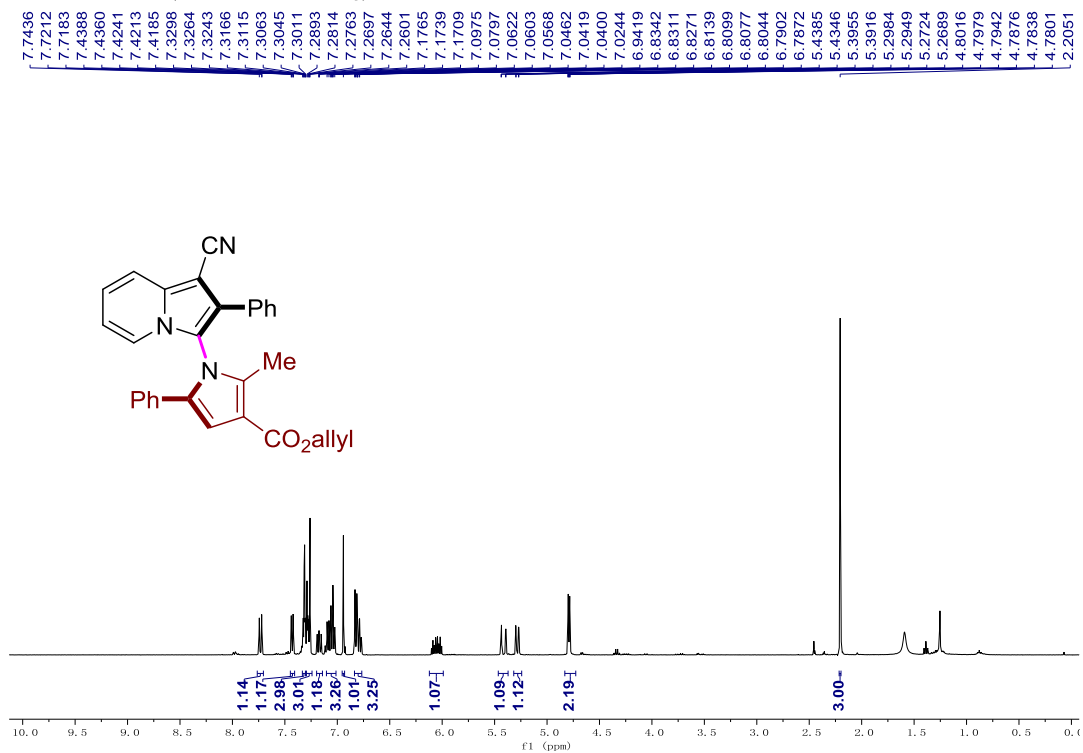

<sup>13</sup>C NMR of **3aa** (100 MHz, CDCl<sub>3</sub>)

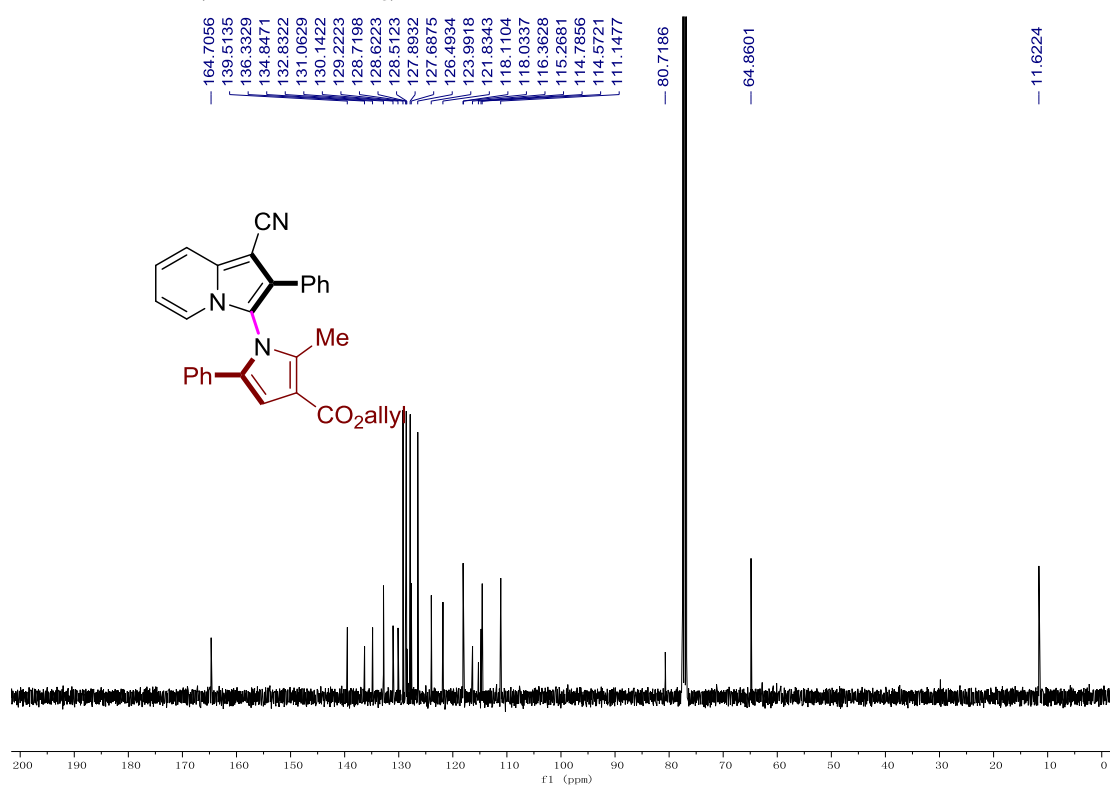

### HPLC analysis: rac-3aa

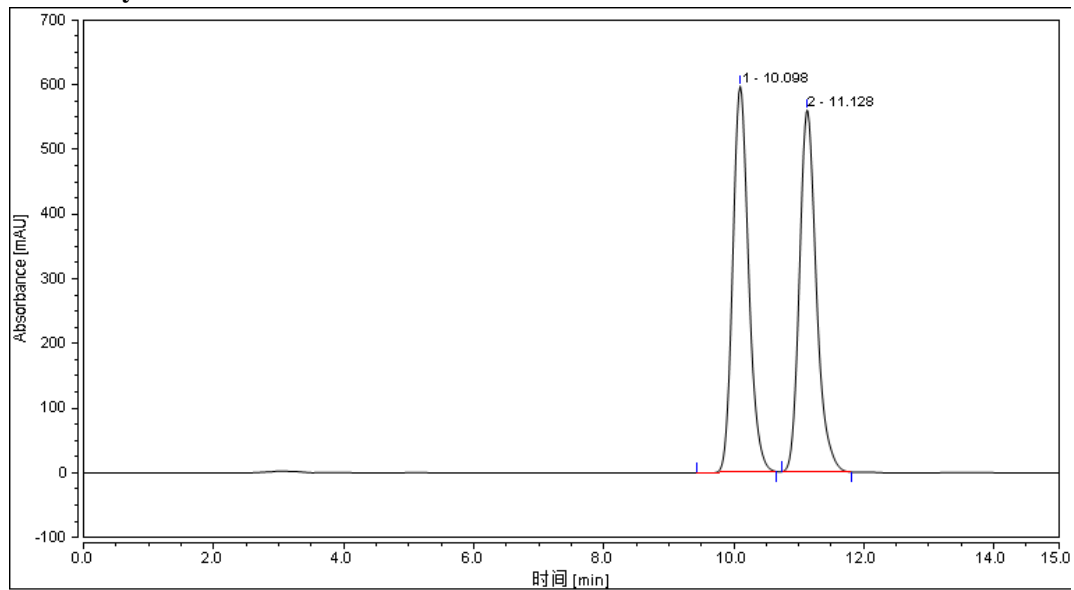

| Peak | RetTime<br>min | Area<br>mAU*min | Height<br>mAU | Area<br>% |
|------|----------------|-----------------|---------------|-----------|
| 1    | 10.098         | 168.147         | 596.689       | 49.95     |
| 2    | 11.128         | 168.507         | 559.237       | 50.05     |

### Enantioenriched 3aa

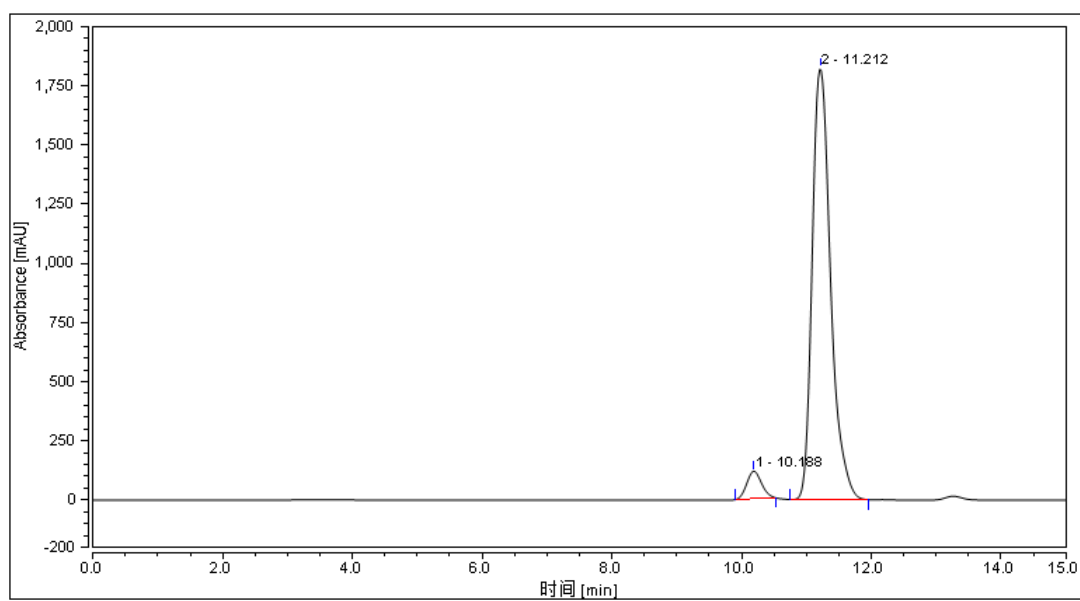

| Peak | RetTime<br>min | Area<br>mAU*min | Height<br>mAU | Area<br>% |
|------|----------------|-----------------|---------------|-----------|
| 1    | 10.188         | 30.716          | 116.540       | 4.88      |
| 2    | 11.212         | 599.213         | 1820.046      | 95.12     |

<sup>1</sup>H NMR of **3ab** (400 MHz, CDCl<sub>3</sub>)

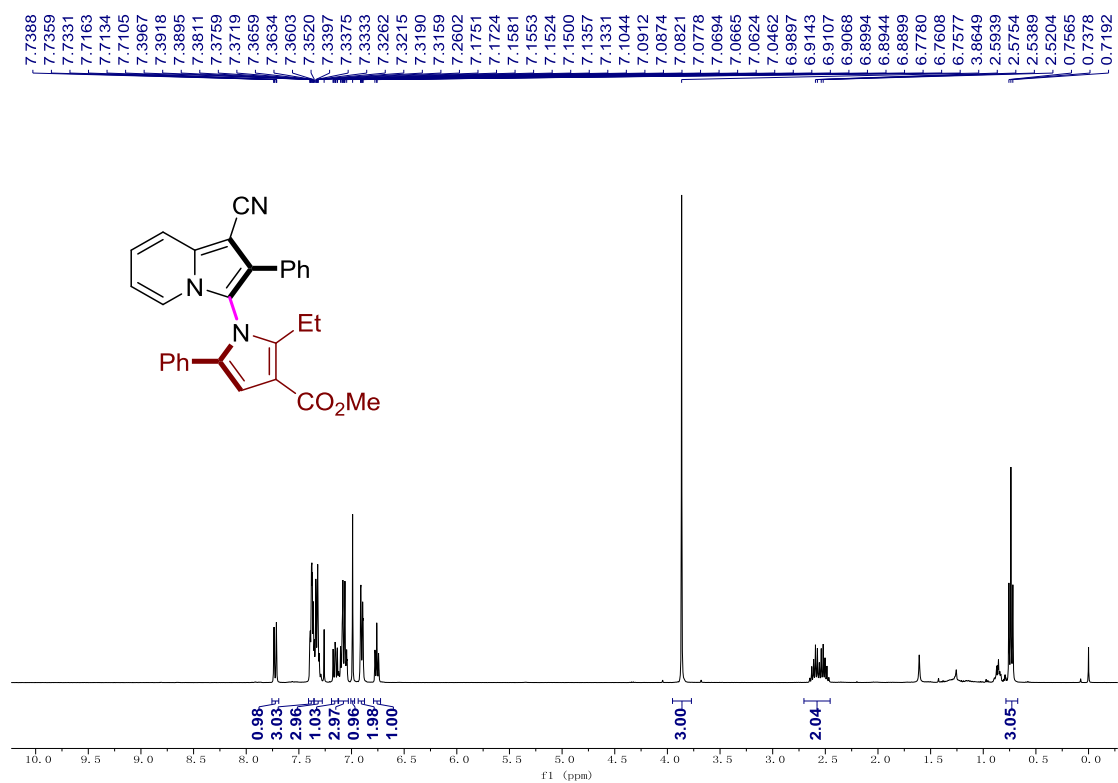

<sup>13</sup>C NMR of **3ab** (100 MHz, CDCl<sub>3</sub>)

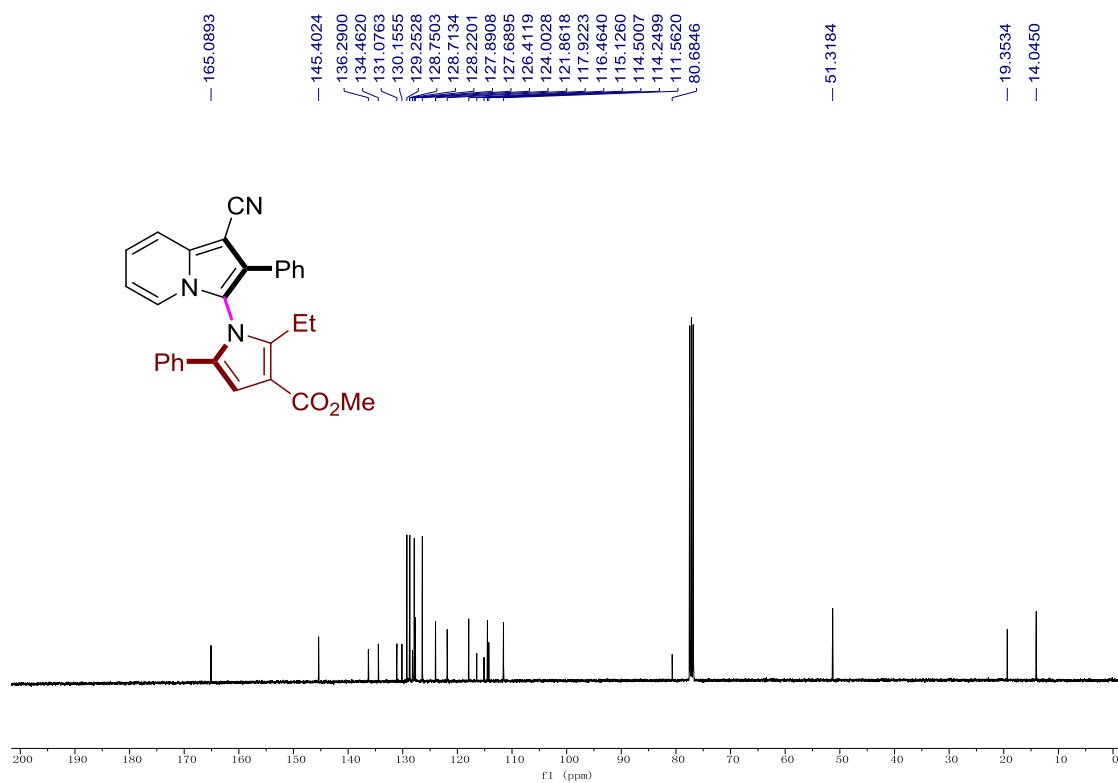

### HPLC analysis: rac-3ab

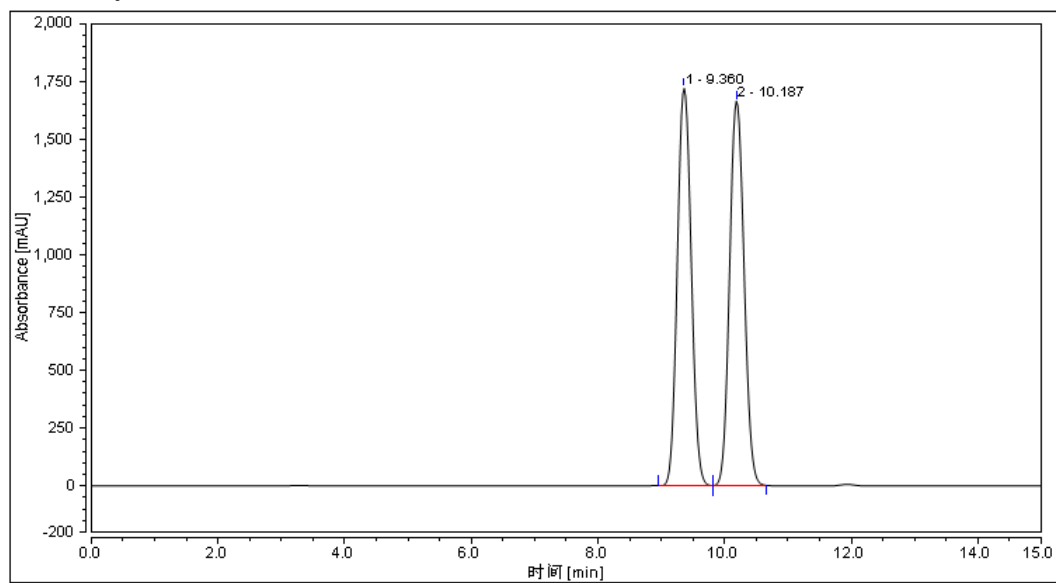

| Peak | RetTime<br>min | Area<br>mAU*min | Height<br>mAU | Area<br>% |
|------|----------------|-----------------|---------------|-----------|
| 1    | 9.360          | 436.802         | 1718.820      | 49.84     |
| 2    | 10.187         | 439.548         | 1663.215      | 50.16     |

### Enantioenriched 3ab

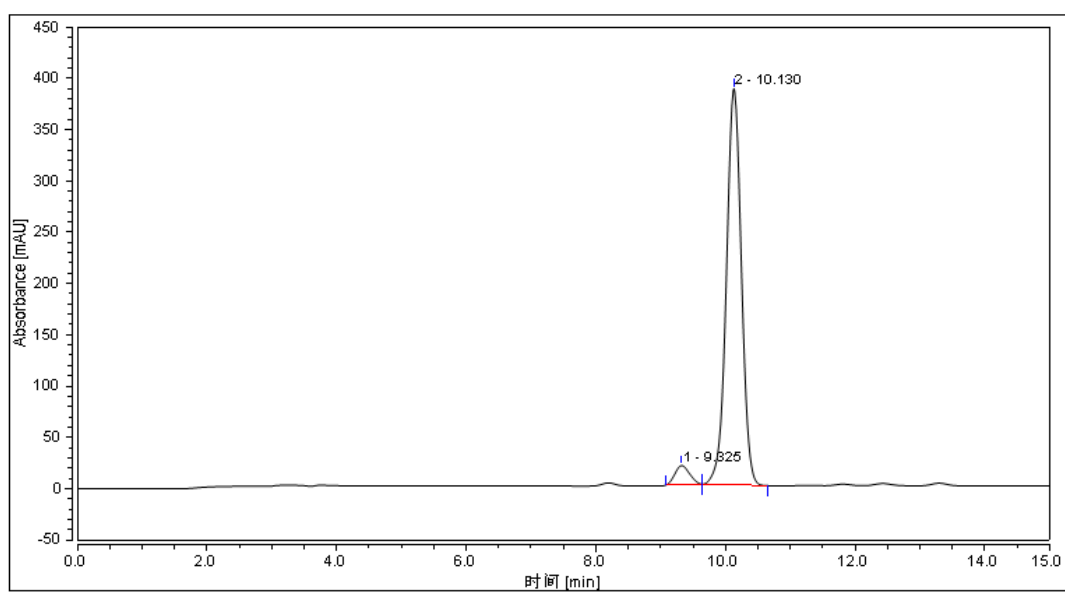

| Peak | RetTime<br>min | Area<br>mAU*min | Height<br>mAU | Area<br>% |
|------|----------------|-----------------|---------------|-----------|
| 1    | 9.325          | 4.923           | 18.795        | 4.54      |
| 2    | 10.130         | 103.514         | 386.591       | 95.46     |

<sup>1</sup>H NMR of **3ac** (400 MHz, CDCl<sub>3</sub>)

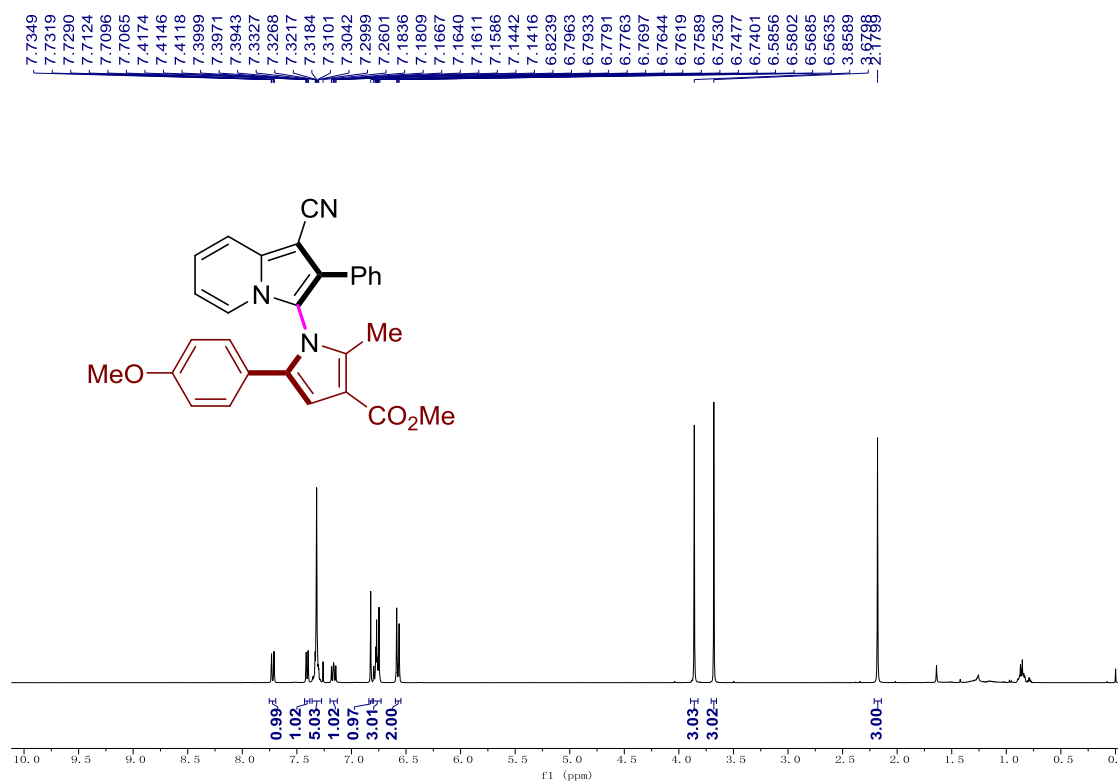

<sup>13</sup>C NMR of **3ac** (100 MHz, CDCl<sub>3</sub>)

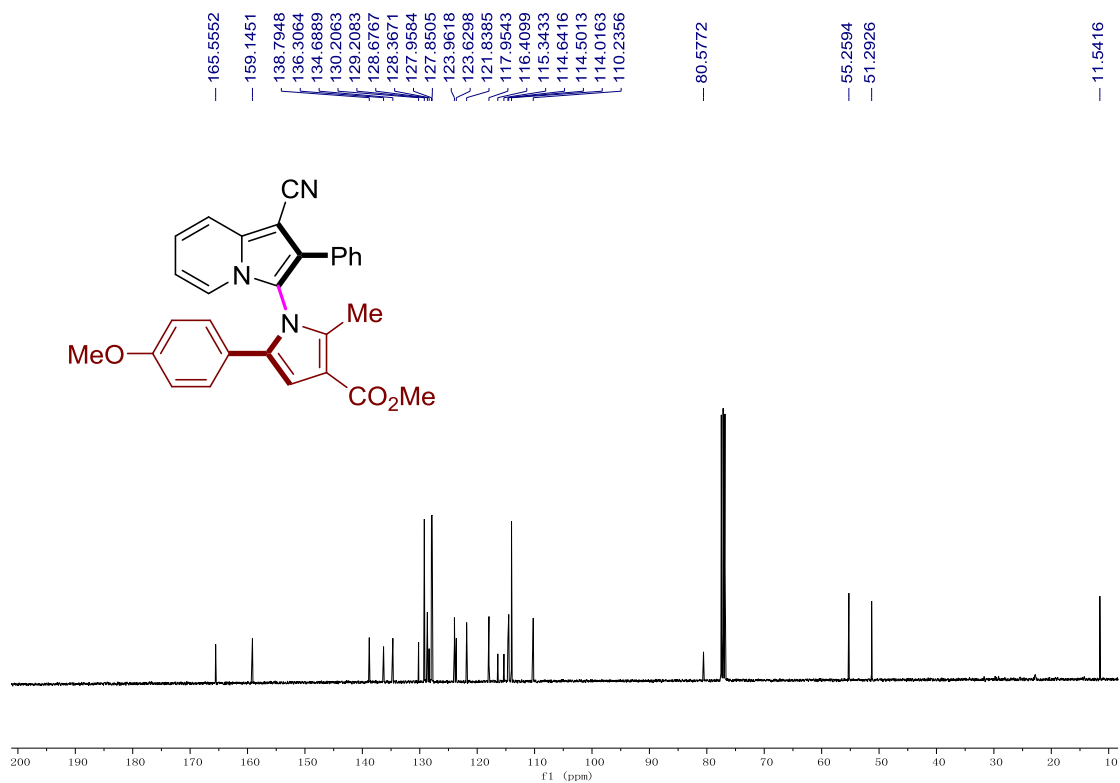

### HPLC analysis: rac-3ac

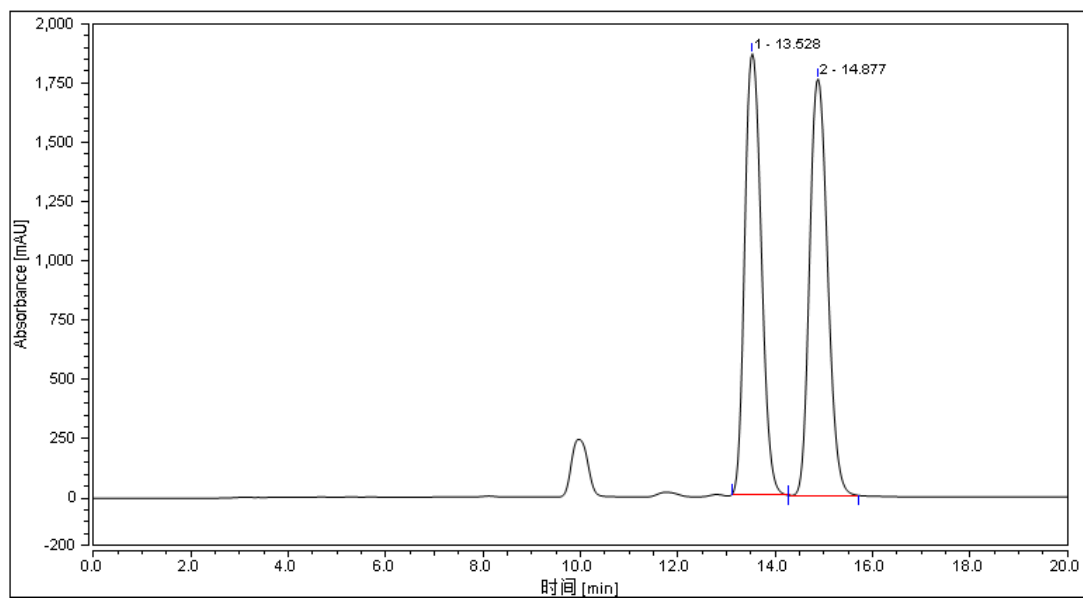

| Peak | RetTime<br>min | Area<br>mAU*min | Height<br>mAU | Area<br>% |
|------|----------------|-----------------|---------------|-----------|
| 1    | 13.528         | 733.559         | 1860.391      | 49.43     |
| 2    | 14.877         | 750.405         | 1756.816      | 50.57     |

### Enantioenriched 3ac

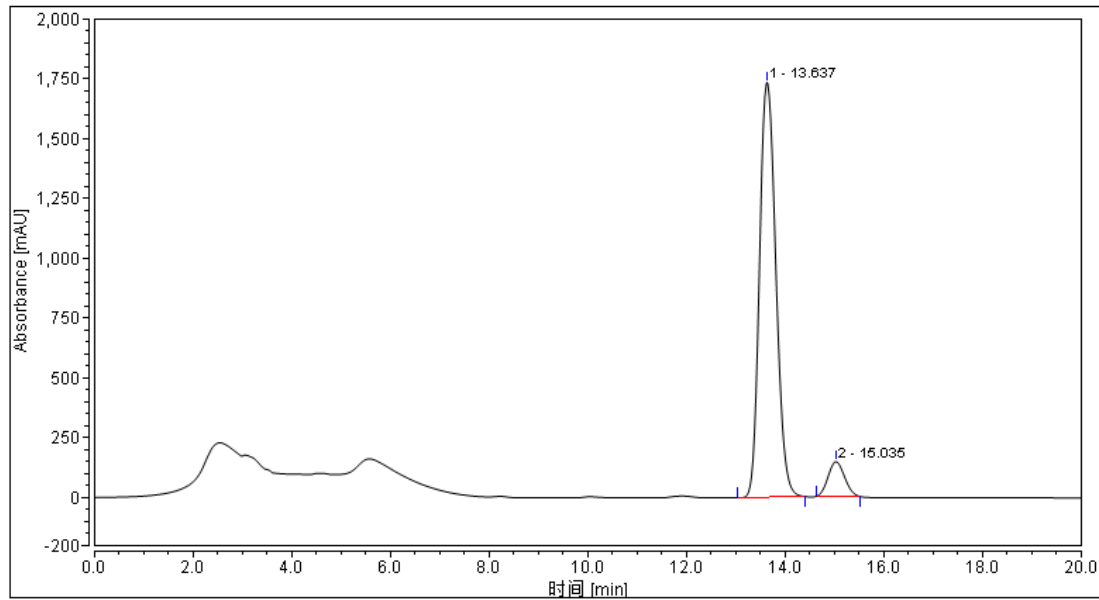

| Peak | RetTime<br>min | Area<br>mAU*min | Height<br>mAU | Area<br>% |
|------|----------------|-----------------|---------------|-----------|
| 1    | 13.637         | 664.565         | 1733.655      | 92.29     |
| 2    | 15.035         | 55.535          | 144.719       | 7.71      |

<sup>1</sup>H NMR of **3ad** (400 MHz, CDCl<sub>3</sub>)

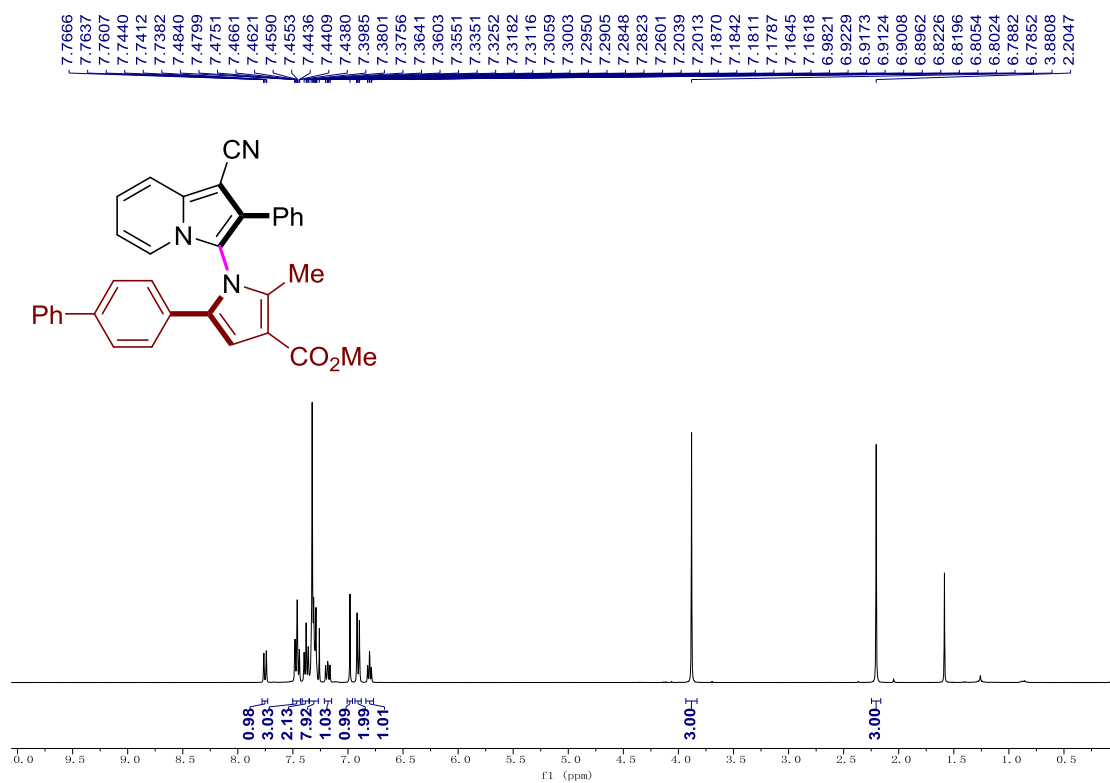

<sup>13</sup>C NMR of **3ad** (100 MHz, CDCl<sub>3</sub>)

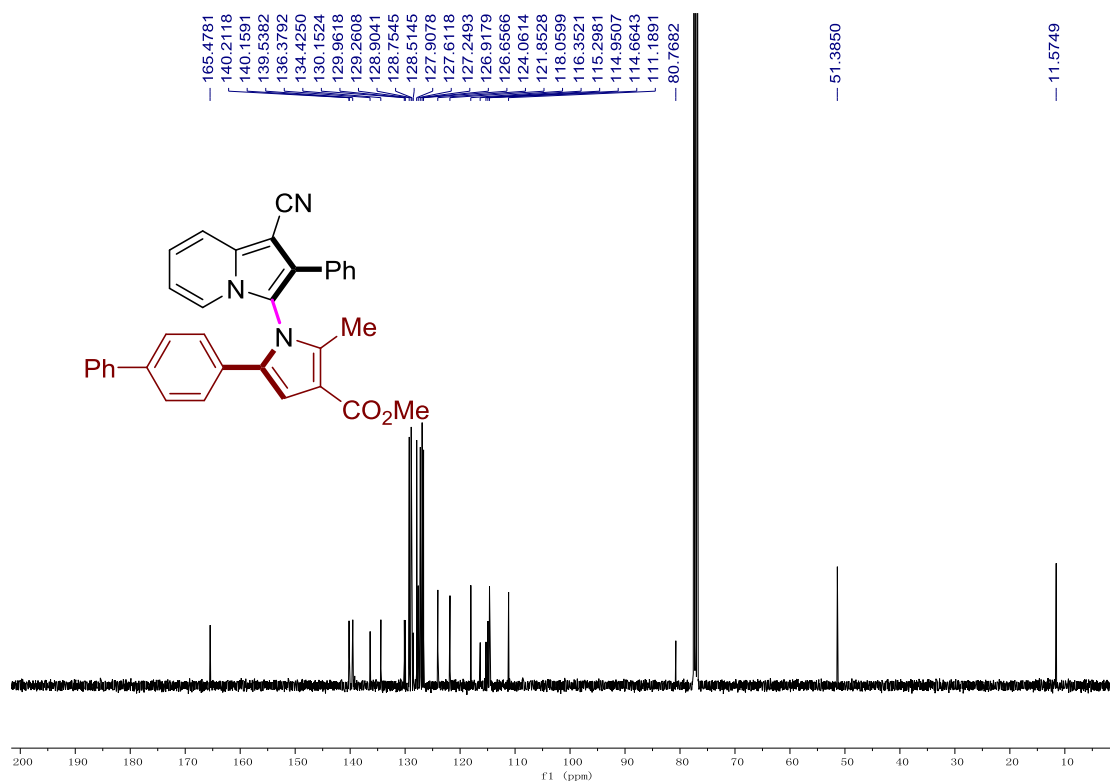



### HPLC analysis: rac-3ad

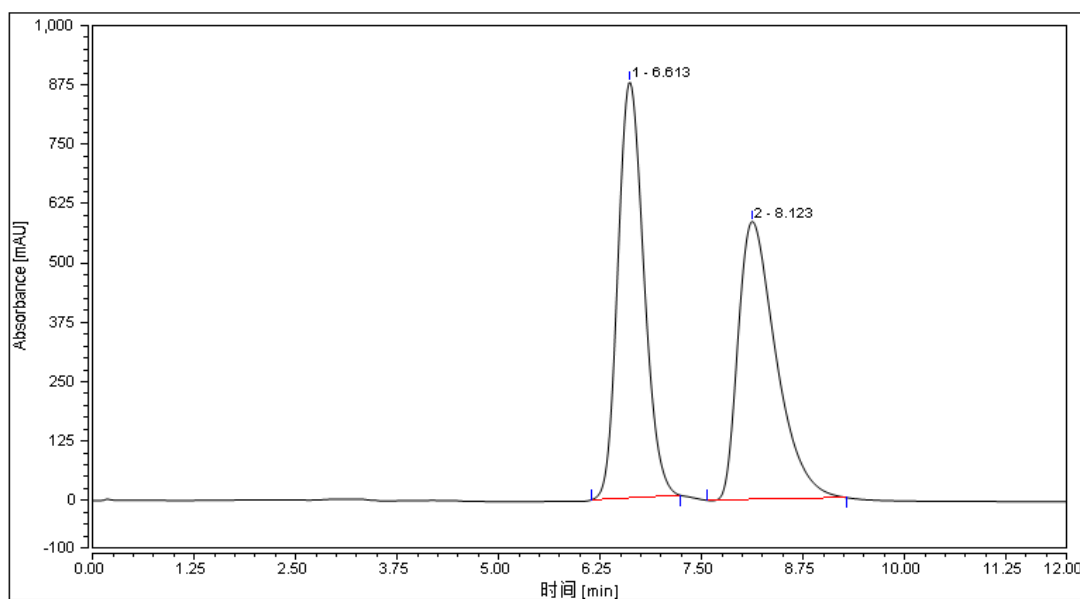

| Peak | RetTime<br>min | Area<br>mAU*min | Height<br>mAU | Area<br>% |
|------|----------------|-----------------|---------------|-----------|
| 1    | 6.613          | 324.484         | 875.481       | 50.68     |
| 2    | 8.123          | 315.742         | 585.101       | 49.32     |

### Enantioenriched 3ad

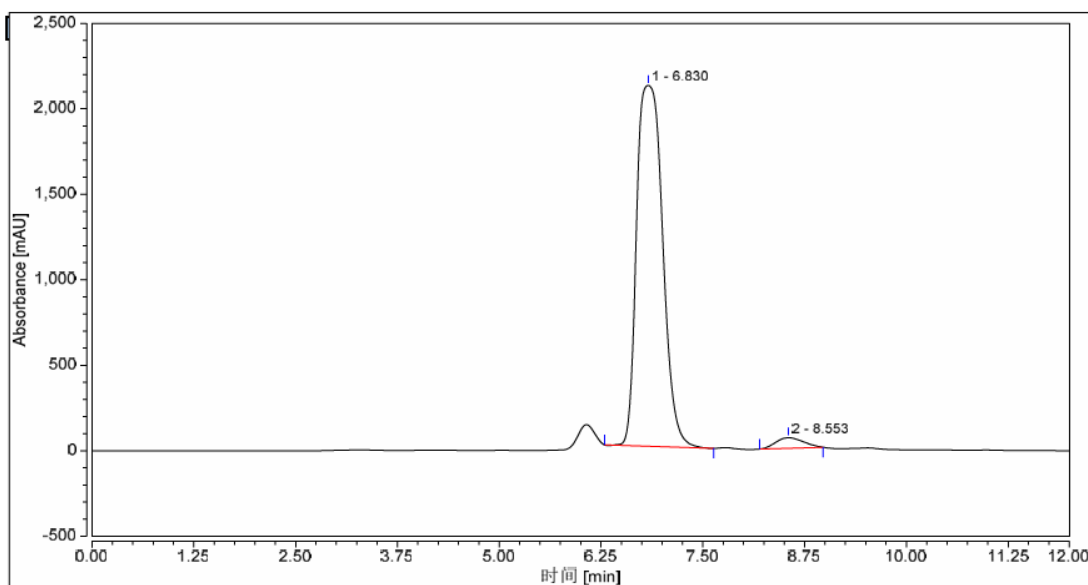

| Peak | RetTime<br>min | Area<br>mAU*min | Height<br>mAU | Area<br>% |
|------|----------------|-----------------|---------------|-----------|
| 1    | 6.830          | 780.206         | 2110.879      | 96.99     |
| 2    | 8.553          | 24.251          | 61.853        | 3.01      |

<sup>1</sup>H NMR of **3ae** (400 MHz, CDCl<sub>3</sub>)

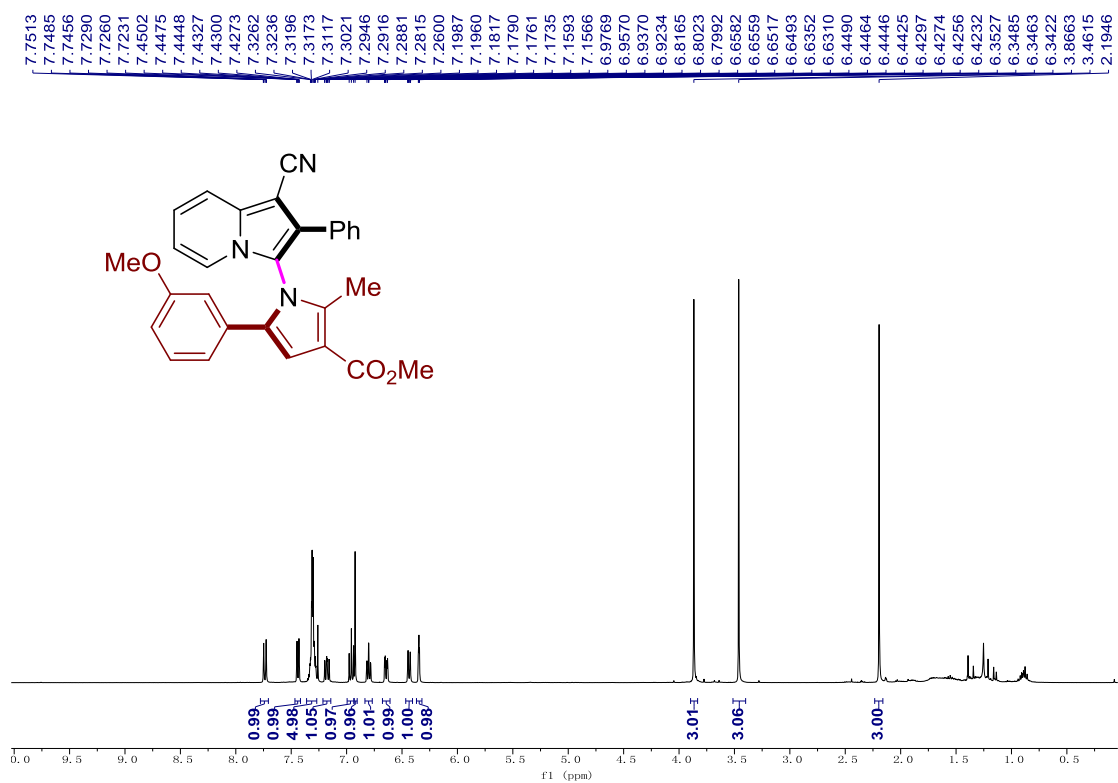

<sup>13</sup>C NMR of **3ae** (100 MHz, CDCl<sub>3</sub>)

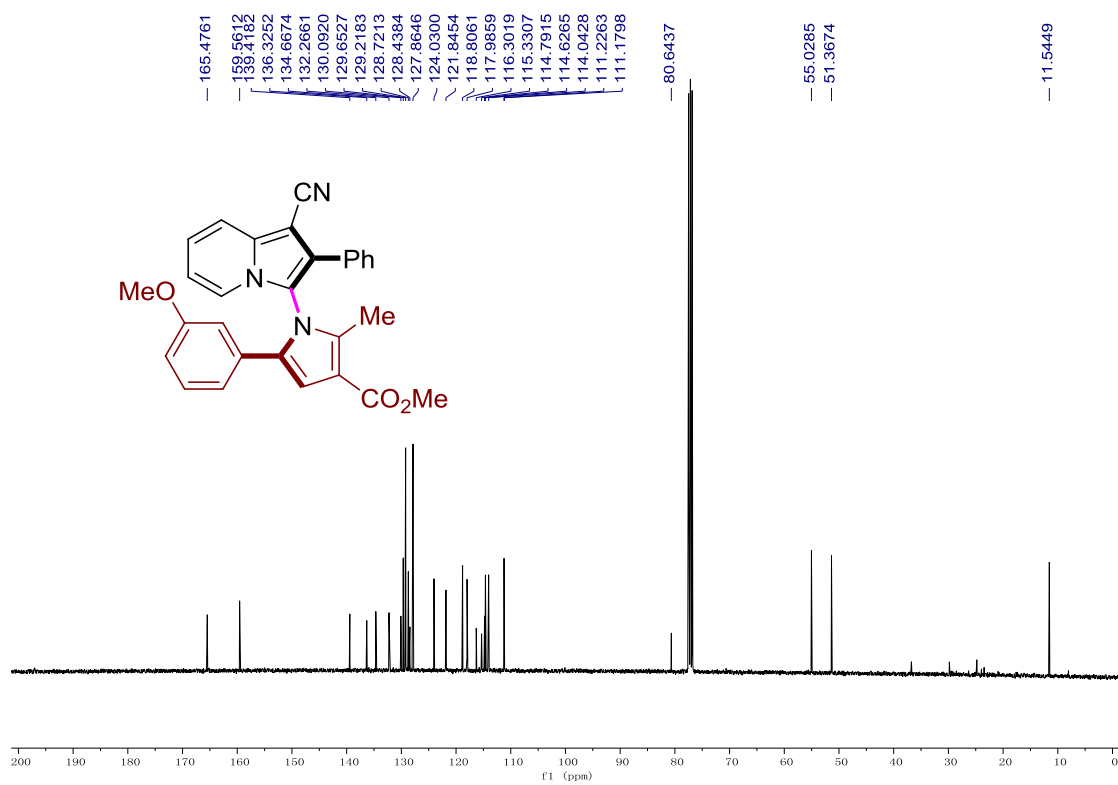

### HPLC analysis: rac-3ae

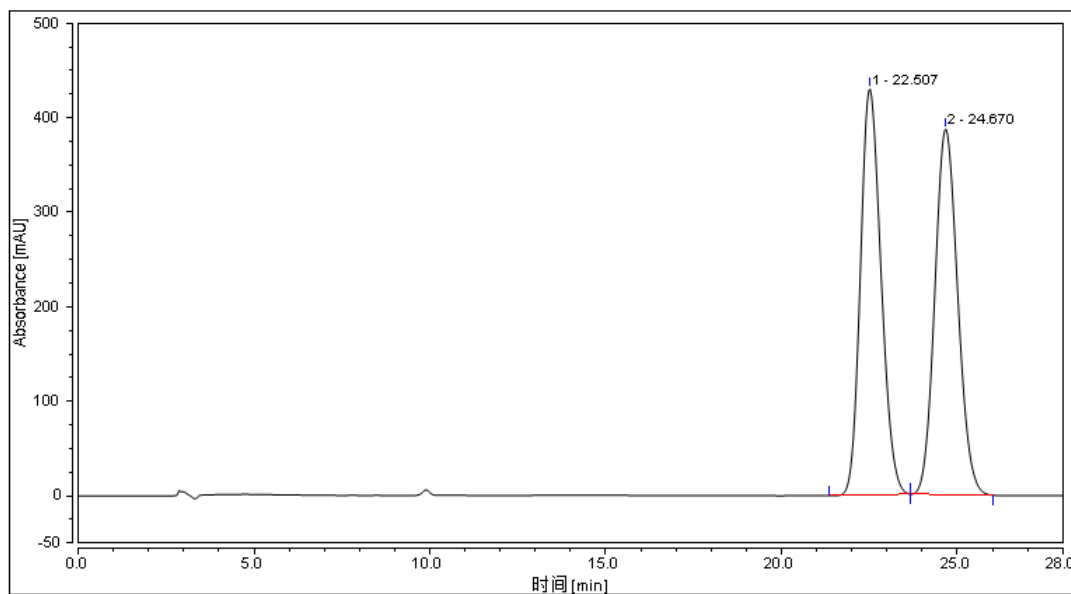

| Peak | RetTime<br>min | Area<br>mAU*min | Height<br>mAU | Area<br>% |
|------|----------------|-----------------|---------------|-----------|
| 1    | 22.507         | 291.538         | 430.042       | 50.00     |
| 2    | 24.670         | 291.582         | 387.276       | 50.00     |

### Enantioenriched 3ae

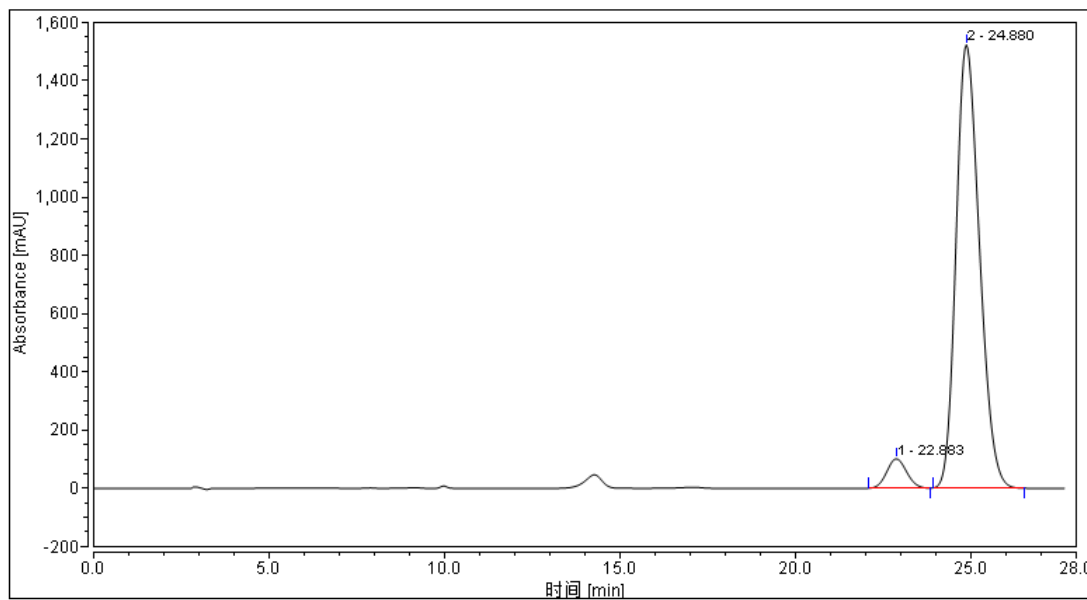

| Peak | RetTime<br>min | Area<br>mAU*min | Height<br>mAU | Area<br>% |
|------|----------------|-----------------|---------------|-----------|
| 1    | 22.883         | 66.254          | 100.827       | 5.33      |
| 2    | 24.880         | 1176.073        | 1522.062      | 94.67     |

<sup>1</sup>H NMR of **3af** (400 MHz, CDCl<sub>3</sub>)

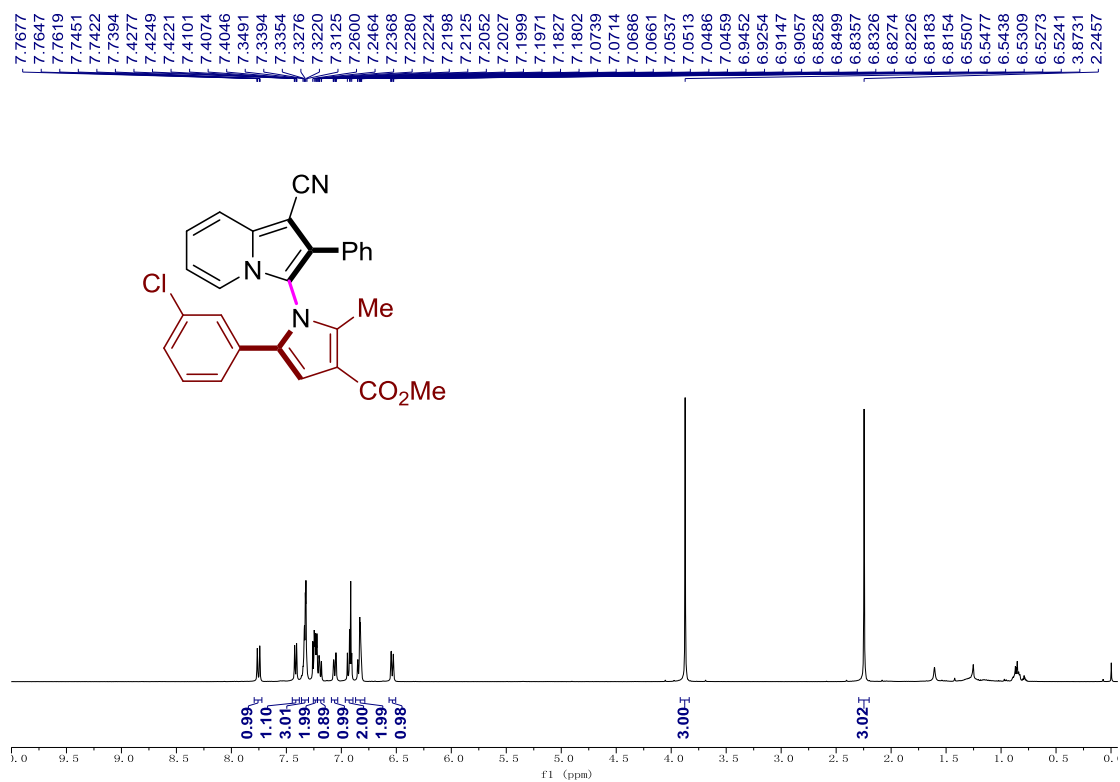

<sup>13</sup>C NMR of **3af** (100 MHz, CDCl<sub>3</sub>)

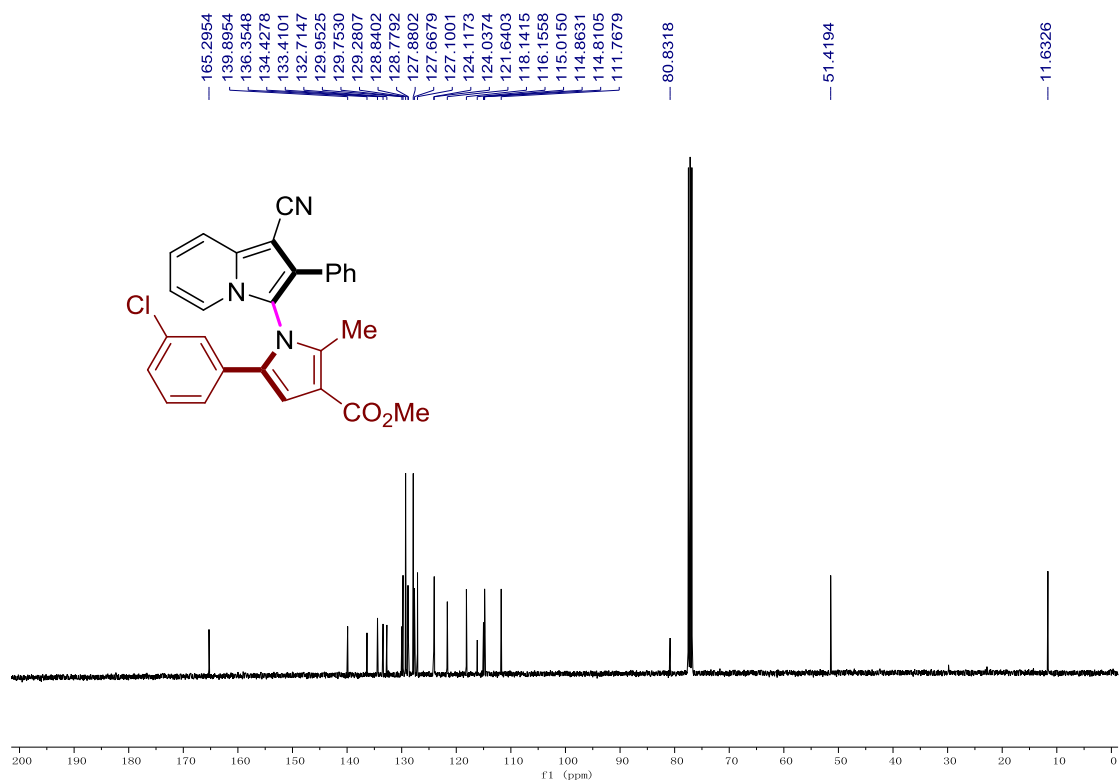

### HPLC analysis: rac-3af

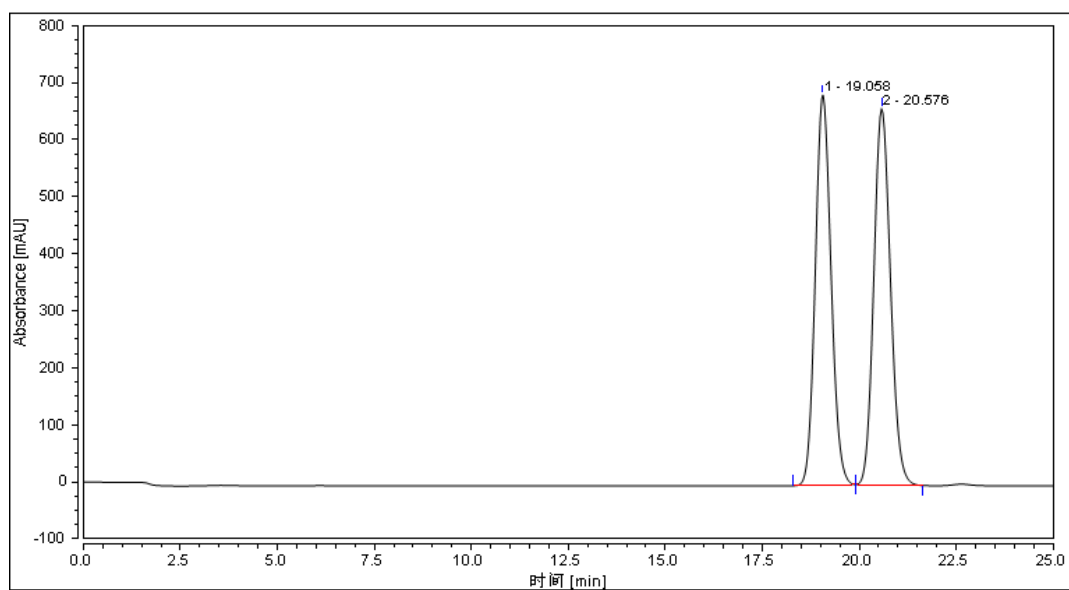

| Peak | RetTime<br>min | Area<br>mAU*min | Height<br>mAU | Area<br>% |
|------|----------------|-----------------|---------------|-----------|
| 1    | 19.058         | 321.714         | 683.926       | 49.49     |
| 2    | 20.576         | 328.365         | 660.045       | 50.51     |

### Enantioenriched 3af

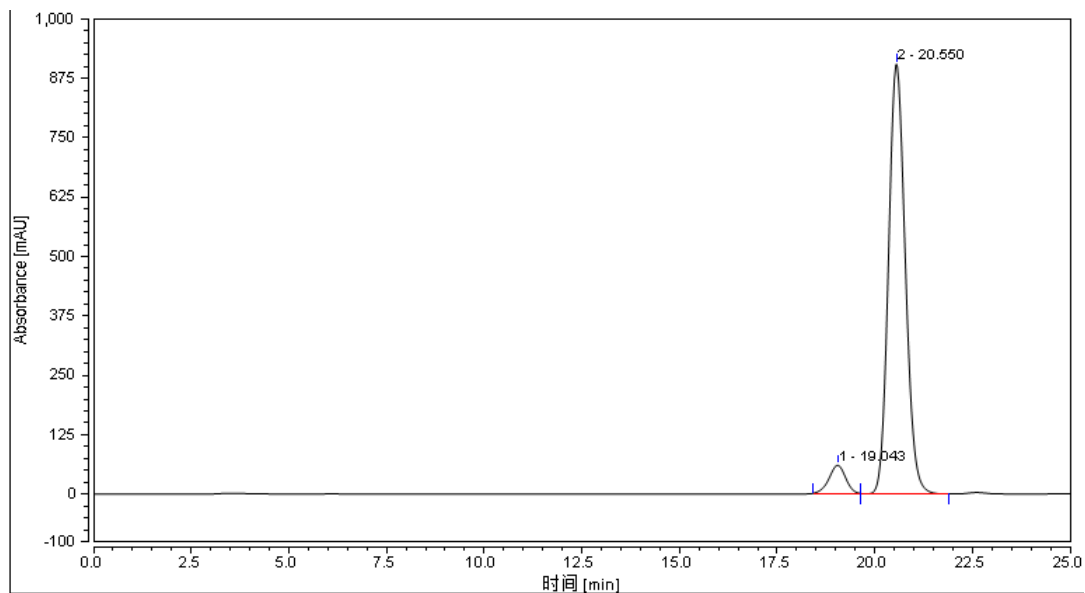

| Peak | RetTime<br>min | Area<br>mAU*min | Height<br>mAU | Area<br>% |
|------|----------------|-----------------|---------------|-----------|
| 1    | 19.043         | 28.997          | 59.324        | 6.06      |
| 2    | 20.550         | 449.503         | 904.040       | 93.94     |

<sup>1</sup>H NMR of **3ag** (400 MHz, CDCl<sub>3</sub>)

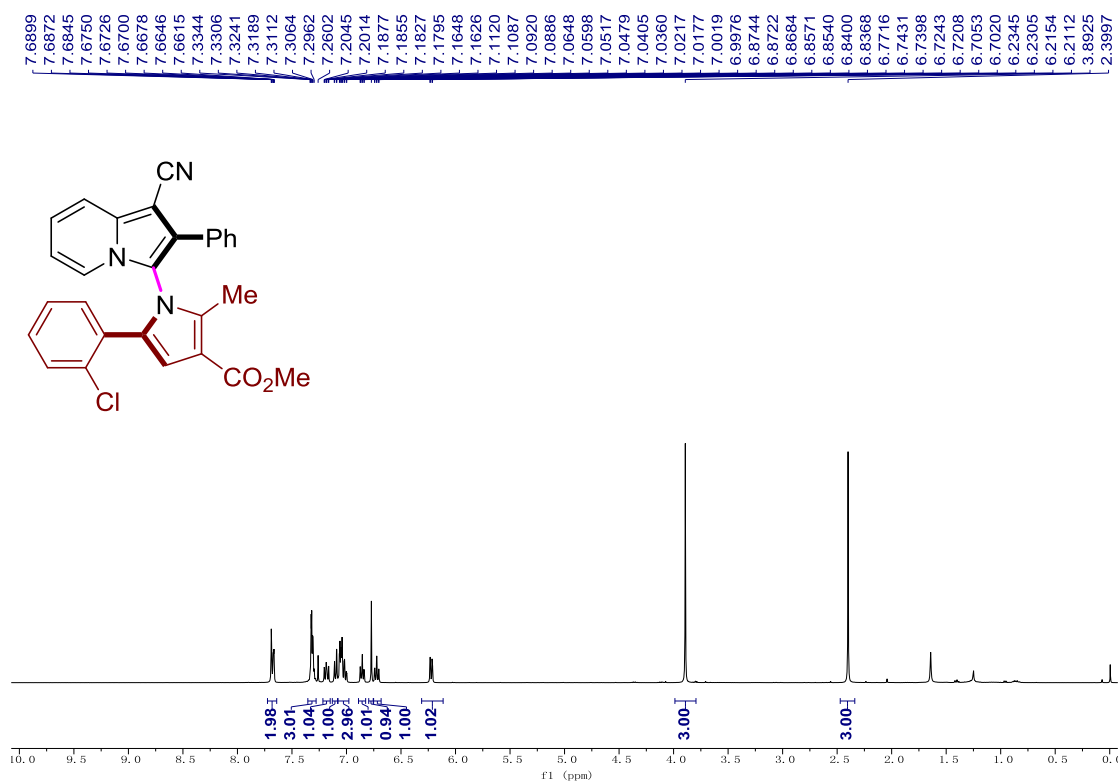

<sup>13</sup>C NMR of **3ag** (100 MHz, CDCl<sub>3</sub>)

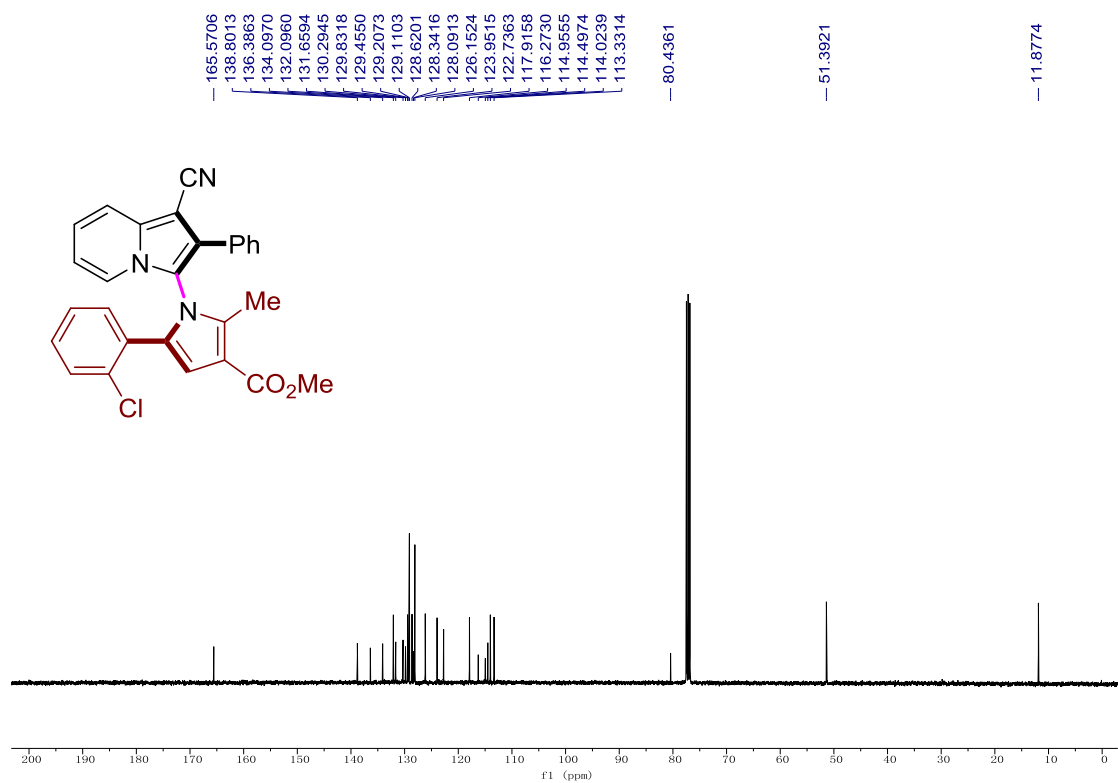

### HPLC analysis: rac-3ag

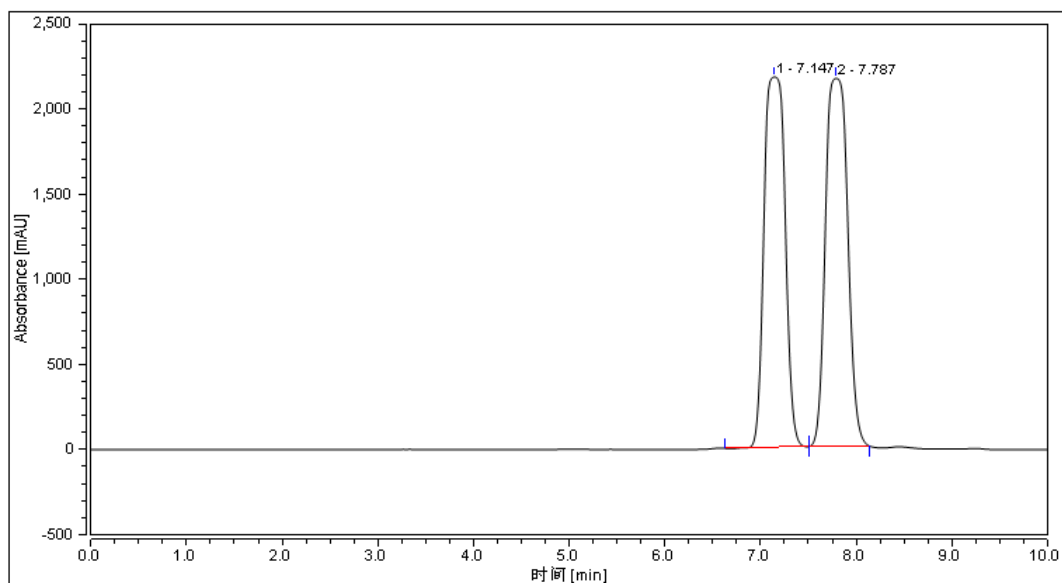

| Peak | RetTime<br>min | Area<br>mAU*min | Height<br>mAU | Area<br>% |
|------|----------------|-----------------|---------------|-----------|
| 1    | 7.147          | 553.634         | 2174.462      | 48.88     |
| 2    | 7.787          | 579.037         | 2161.215      | 51.12     |

### Enantioenriched 3ag

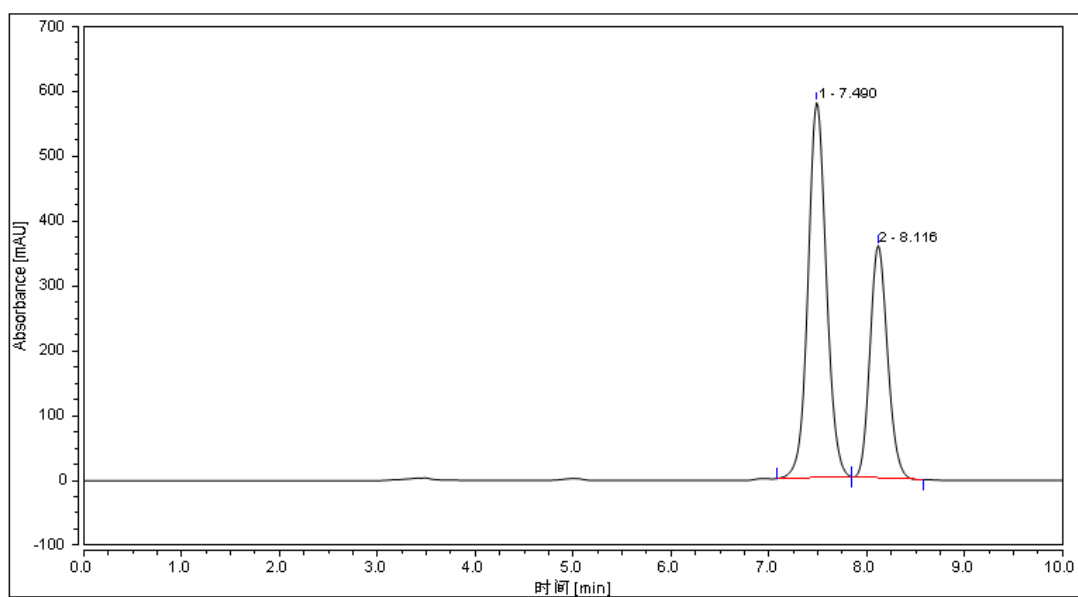

| Peak | RetTime<br>min | Area<br>mAU*min | Height<br>mAU | Area<br>% |
|------|----------------|-----------------|---------------|-----------|
| 1    | 7.490          | 125.320         | 578.423       | 62.81     |
| 2    | 8.116          | 74.198          | 358.079       | 37.19     |

<sup>1</sup>H NMR of **3ah** (400 MHz, CDCl<sub>3</sub>)

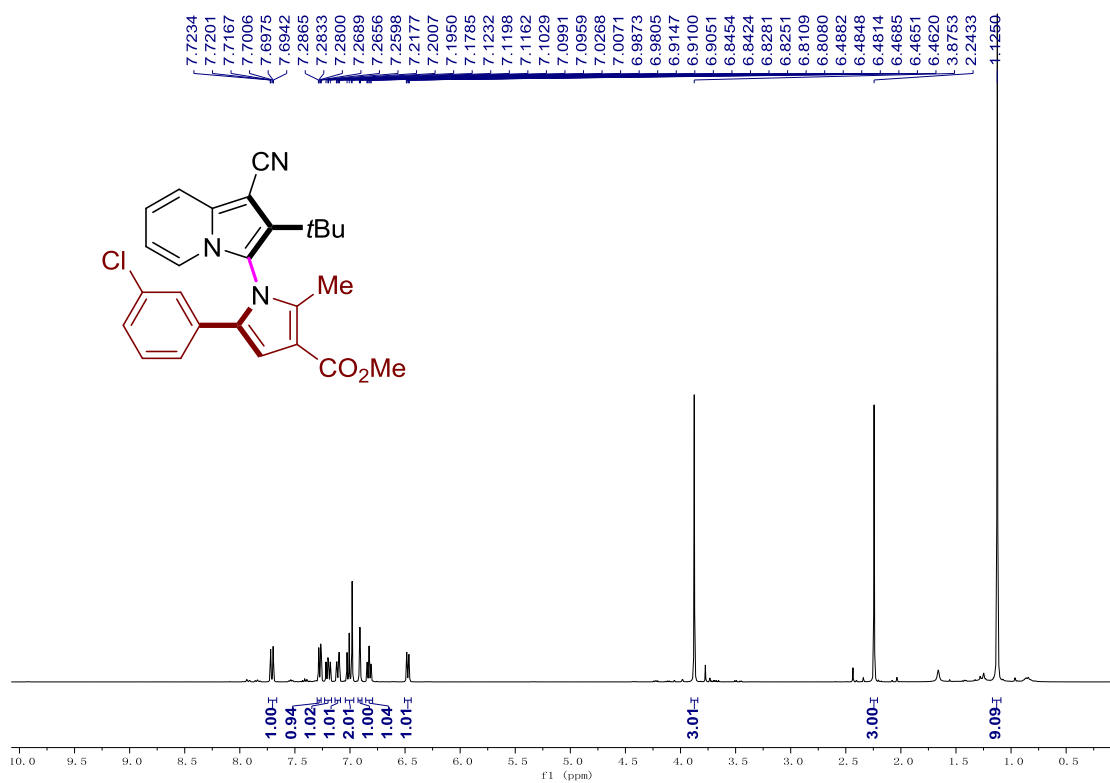

<sup>13</sup>C NMR of **3ah** (100 MHz, CDCl<sub>3</sub>)

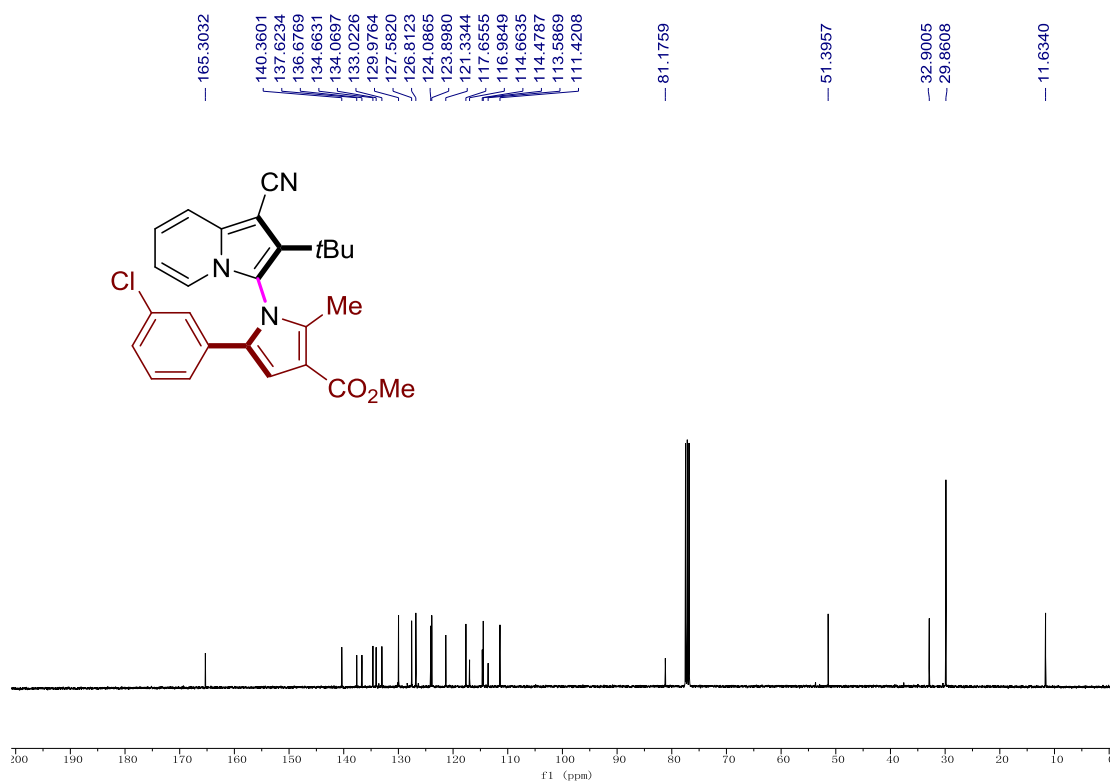



### HPLC analysis: rac-3ah

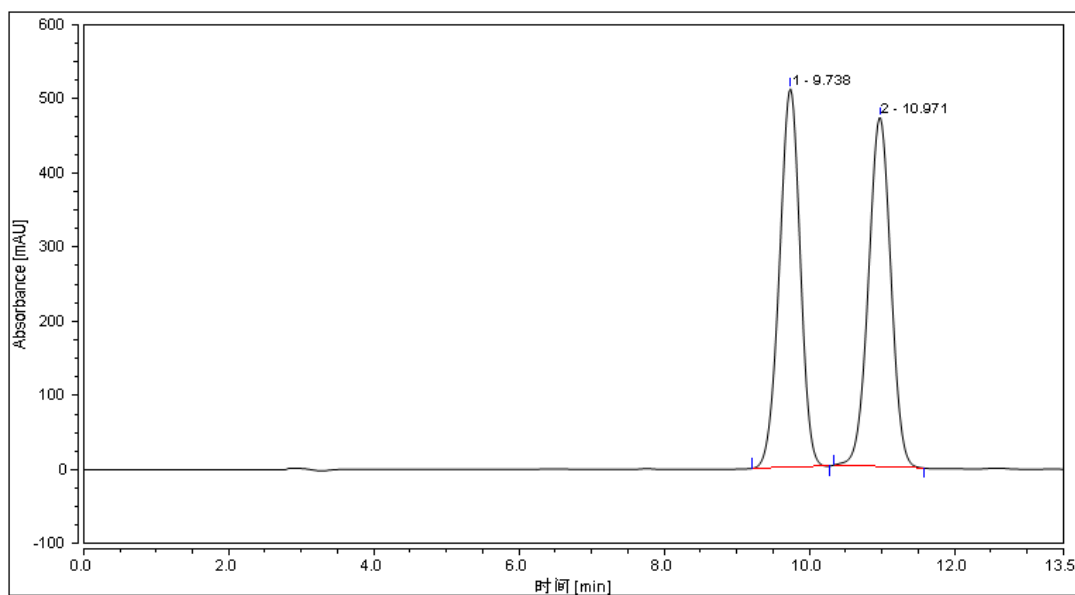

| Peak | RetTime<br>min | Area<br>mAU*min | Height<br>mAU | Area<br>% |
|------|----------------|-----------------|---------------|-----------|
| 1    | 9.738          | 168.563         | 510.159       | 50.14     |
| 2    | 10.971         | 167.620         | 470.818       | 49.86     |

### Enantioenriched 3ah

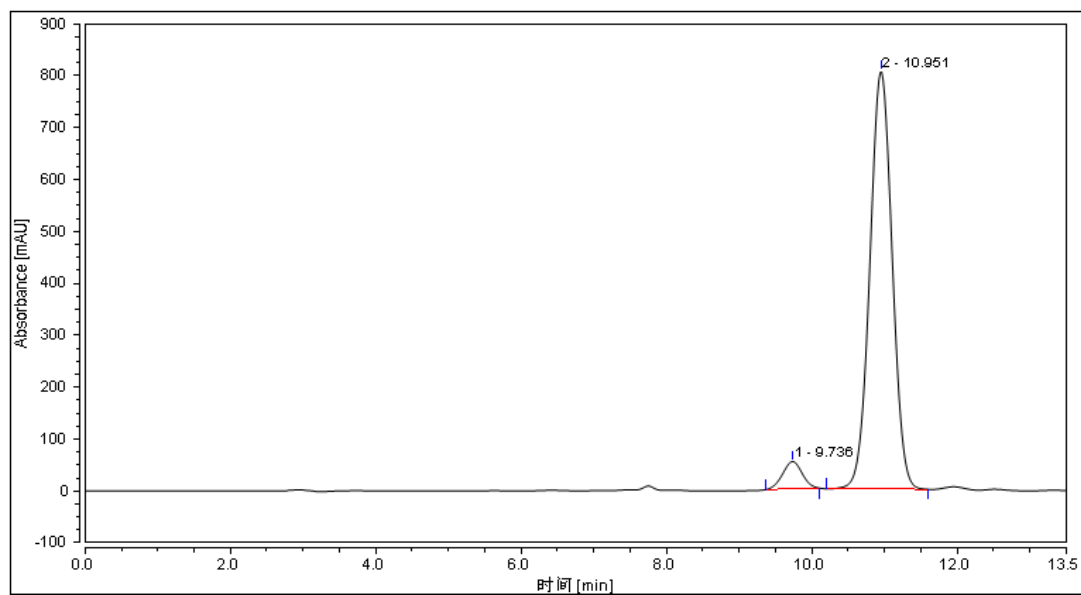

| Peak | RetTime<br>min | Area<br>mAU*min | Height<br>mAU | Area<br>% |
|------|----------------|-----------------|---------------|-----------|
| 1    | 9.736          | 16.384          | 52.671        | 5.42      |
| 2    | 10.951         | 285.903         | 805.126       | 94.58     |

<sup>1</sup>H NMR of **3ai** (400 MHz, CDCl<sub>3</sub>)

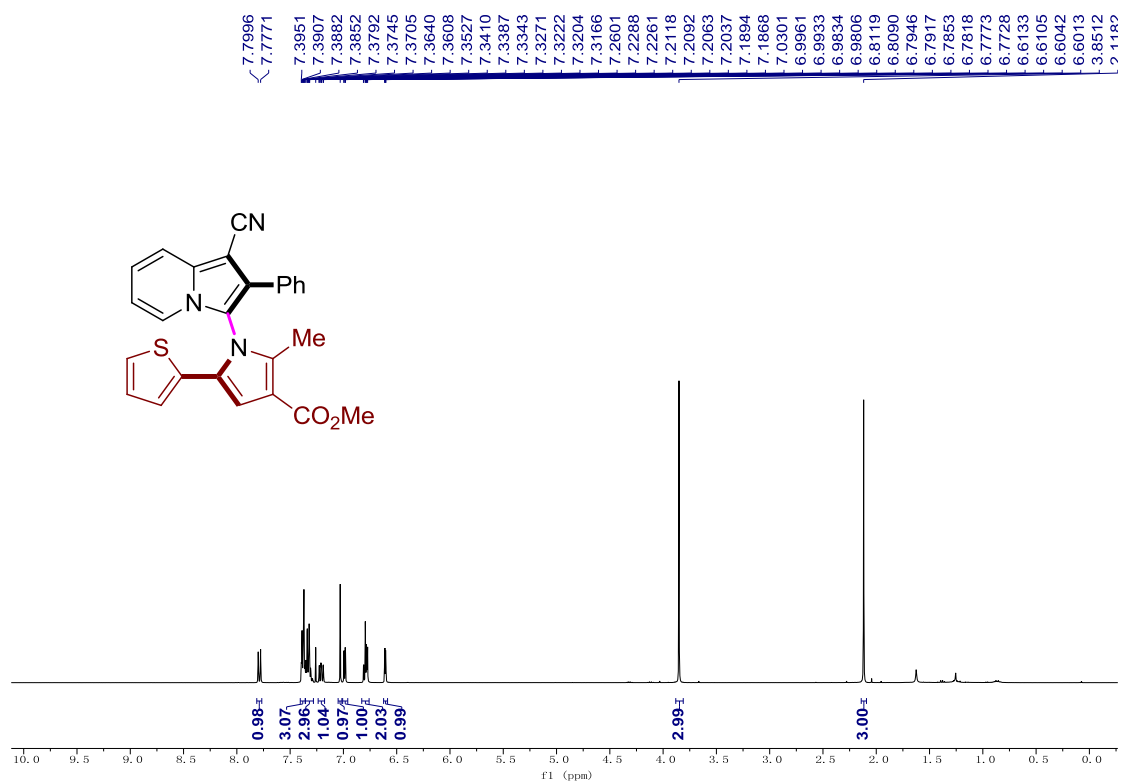

<sup>13</sup>C NMR of **3ai** (100 MHz, CDCl<sub>3</sub>)

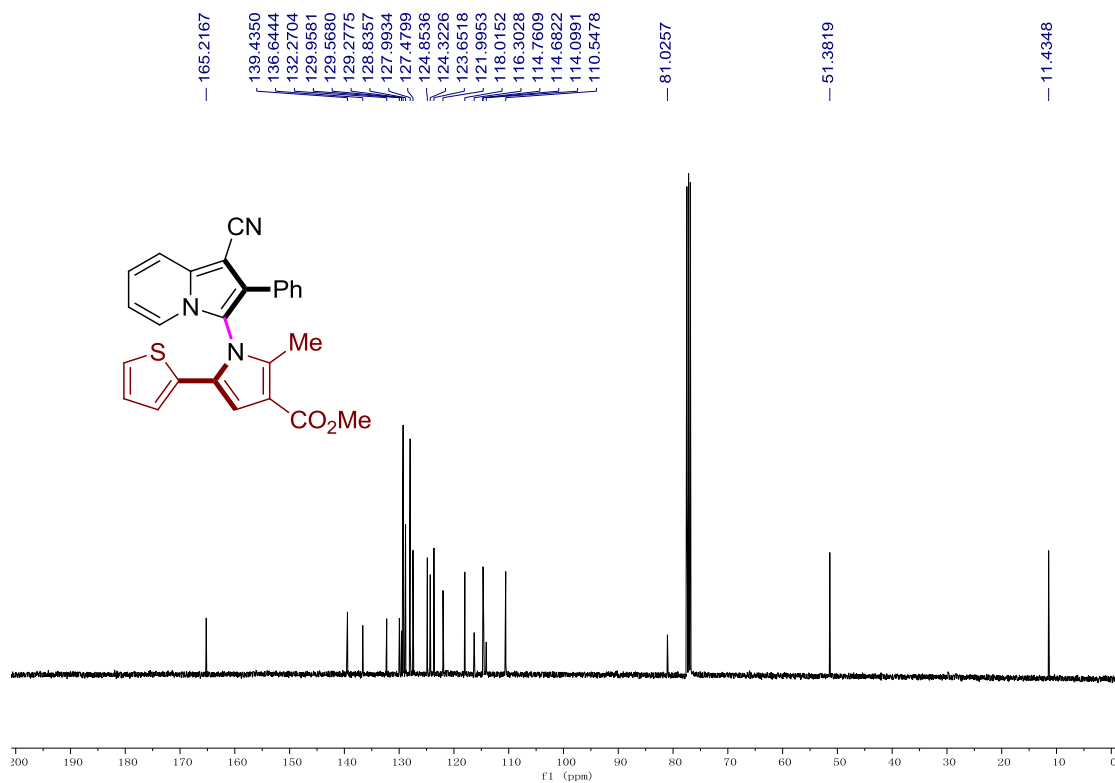

### HPLC analysis: rac-3ai

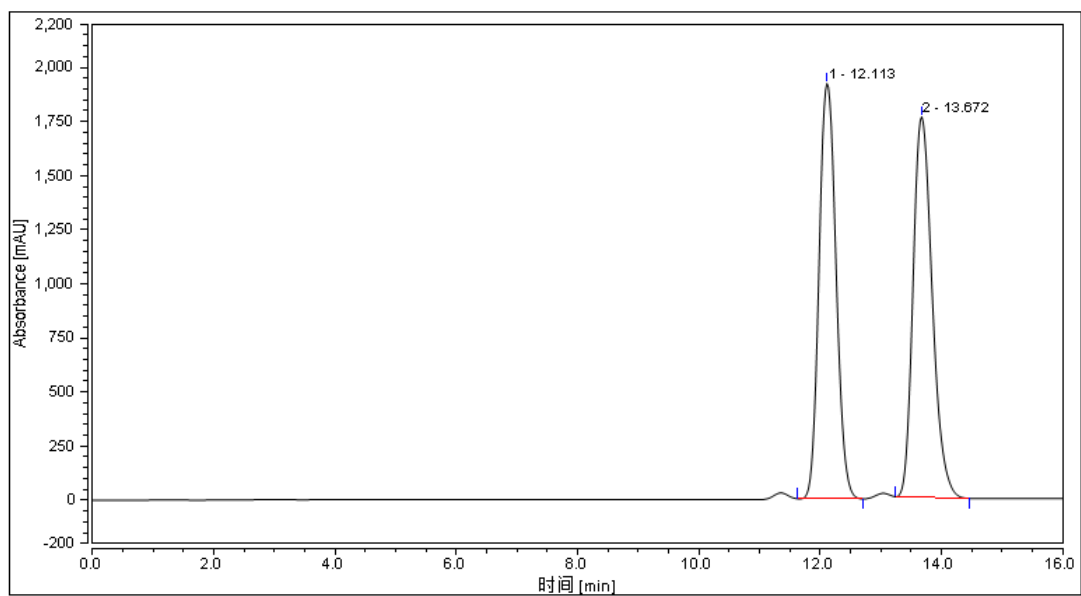

| Peak | RetTime<br>min | Area<br>mAU*min | Height<br>mAU | Area<br>% |
|------|----------------|-----------------|---------------|-----------|
| 1    | 12.113         | 622.059         | 1920.675      | 49.17     |
| 2    | 13.672         | 643.113         | 1759.724      | 50.83     |

### Enantioenriched 3ai

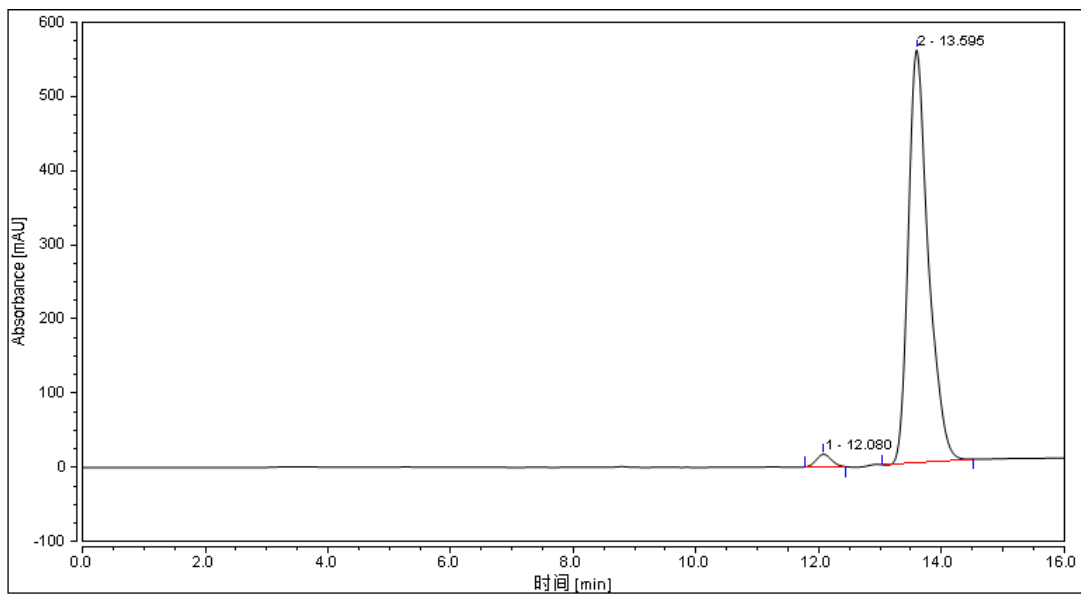

| Peak | RetTime<br>min | Area<br>mAU*min | Height<br>mAU | Area<br>% |
|------|----------------|-----------------|---------------|-----------|
| 1    | 12.080         | 4.812           | 16.825        | 2.23      |
| 2    | 13.595         | 210.561         | 556.375       | 97.77     |

<sup>1</sup>H NMR of **3aj** (400 MHz, CDCl<sub>3</sub>)

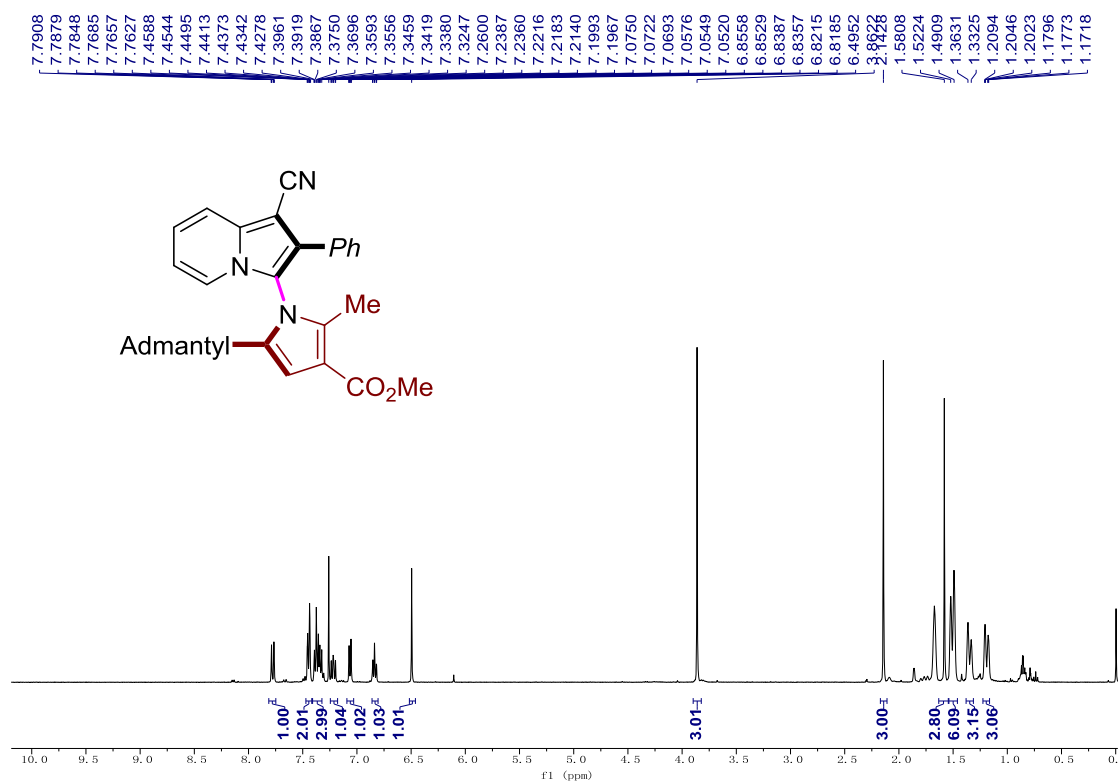

<sup>13</sup>C NMR of **3aj** (100 MHz, CDCl<sub>3</sub>)

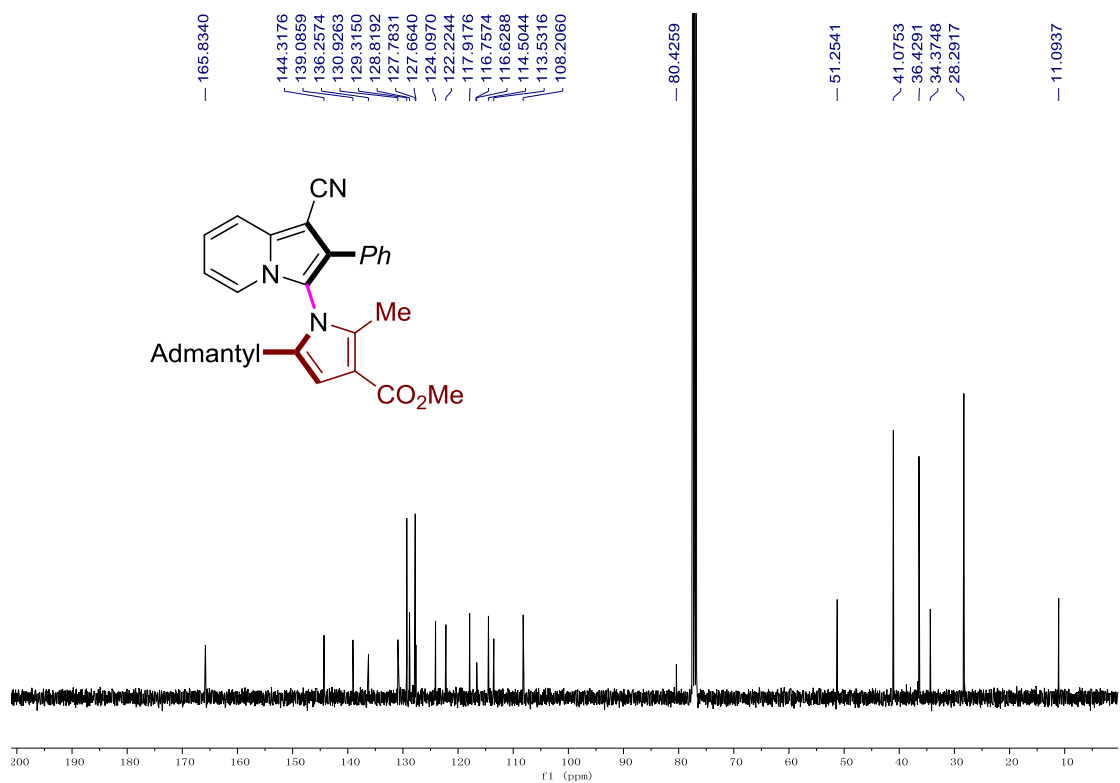

### HPLC analysis: rac-3aj

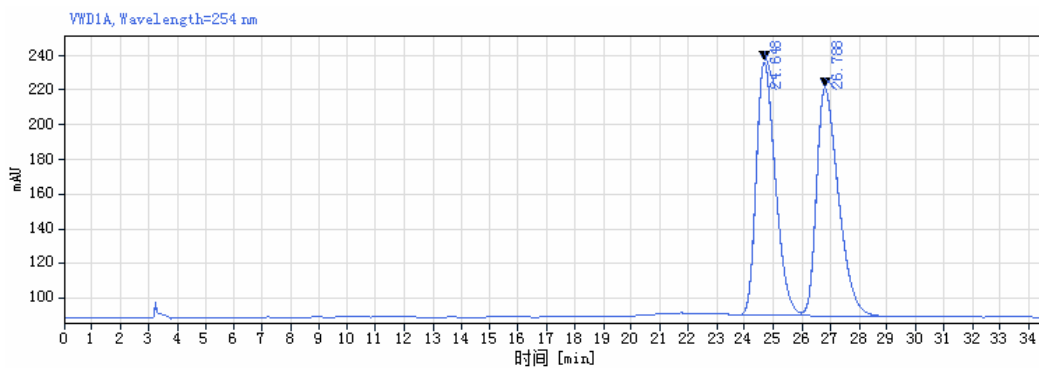

| Peak | RetTime<br>min | Area<br>mAU*min | Height<br>mAU | Area<br>% |
|------|----------------|-----------------|---------------|-----------|
| 1    | 24.648         | 6845.94         | 146.37        | 49.15     |
| 2    | 26.788         | 7082.46         | 131.52        | 50.85     |

### Enantioenriched 3aj

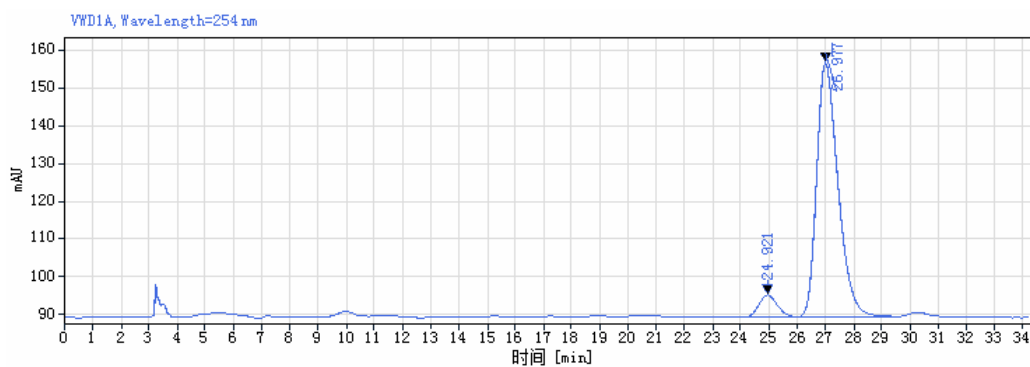

| Peak | RetTime<br>min | Area<br>mAU*min | Height<br>mAU | Area<br>% |
|------|----------------|-----------------|---------------|-----------|
| 1    | 24.921         | 262.42          | 5.83          | 6.93      |
| 2    | 26.977         | 3523.75         | 67.21         | 93.07     |

<sup>1</sup>H NMR of **4** (400 MHz, CDCl<sub>3</sub>)

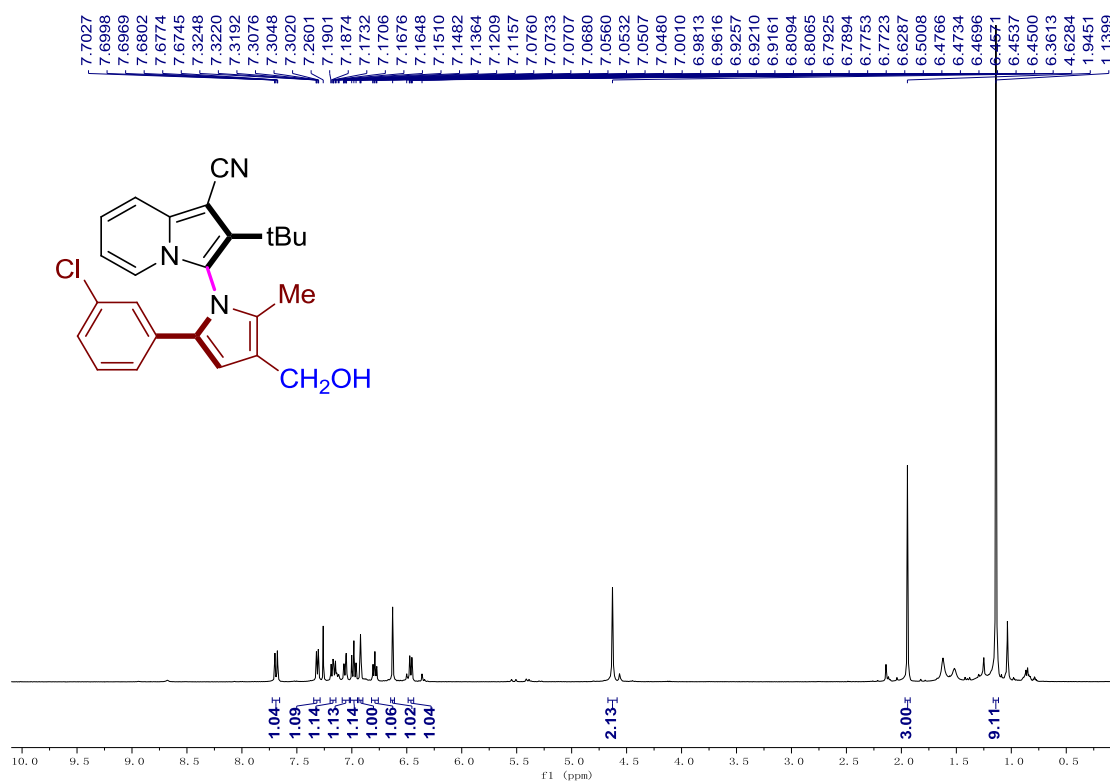

<sup>13</sup>C NMR of **4** (100 MHz, CDCl<sub>3</sub>)

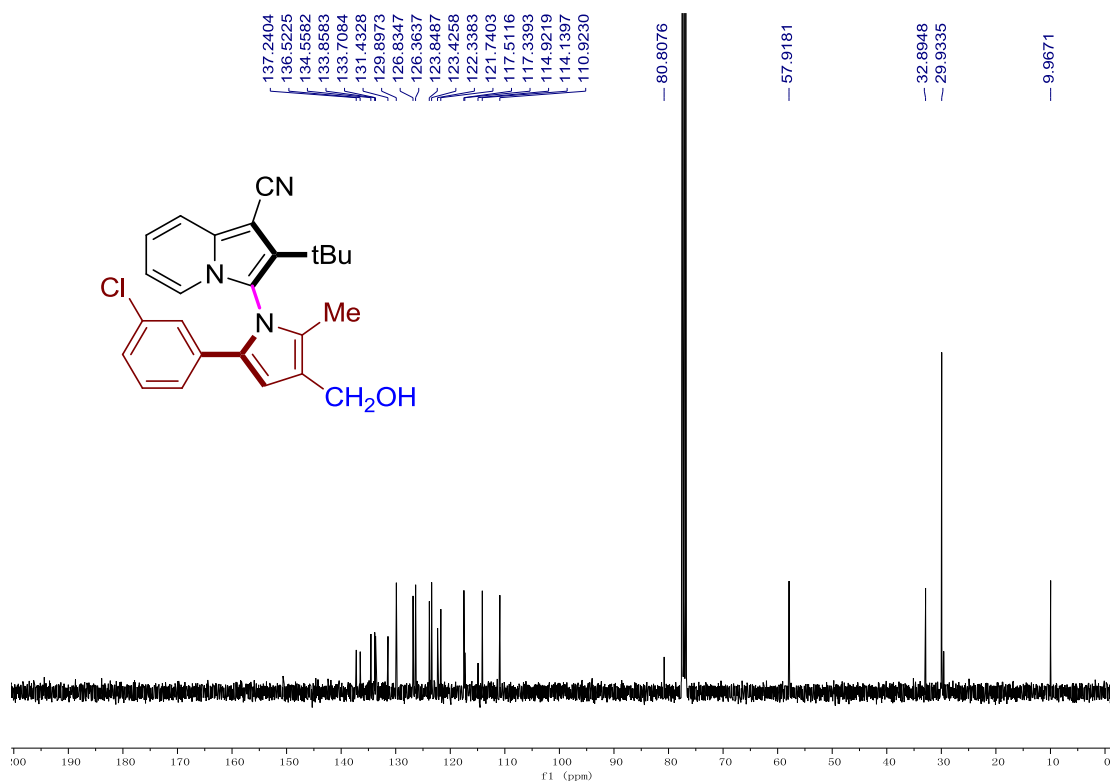

### HPLC analysis: rac-4

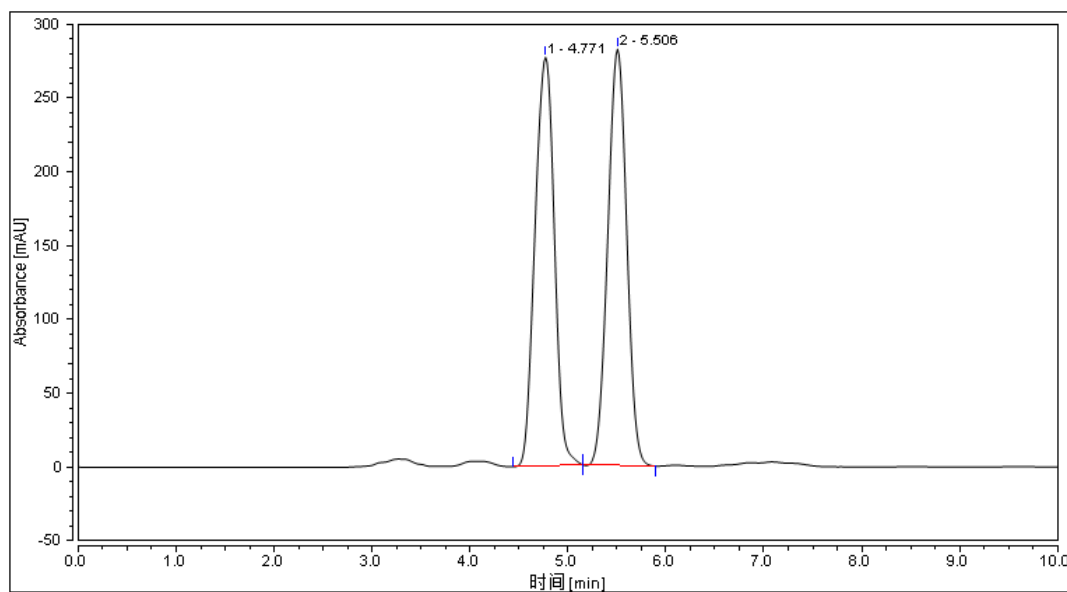

| Peak | RetTime<br>min | Area<br>mAU*min | Height<br>mAU | Area<br>% |
|------|----------------|-----------------|---------------|-----------|
| 1    | 4.771          | 63.297          | 276.884       | 50.08     |
| 2    | 5.506          | 63.102          | 282.097       | 49.92     |

### Enantioenriched 4

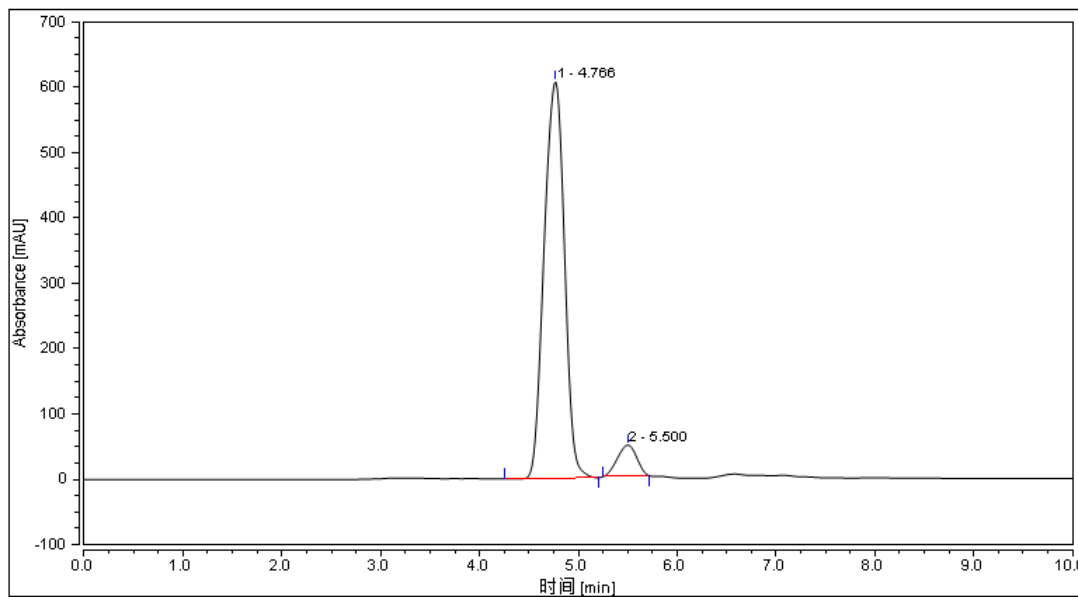

| Peak | RetTime<br>min | Area<br>mAU*min | Height<br>mAU | Area<br>% |
|------|----------------|-----------------|---------------|-----------|
| 1    | 4.766          | 144.322         | 607.298       | 93.10     |
| 2    | 5.500          | 10.694          | 47.303        | 6.90      |

<sup>1</sup>H NMR of **5** (400 MHz, CDCl<sub>3</sub>)

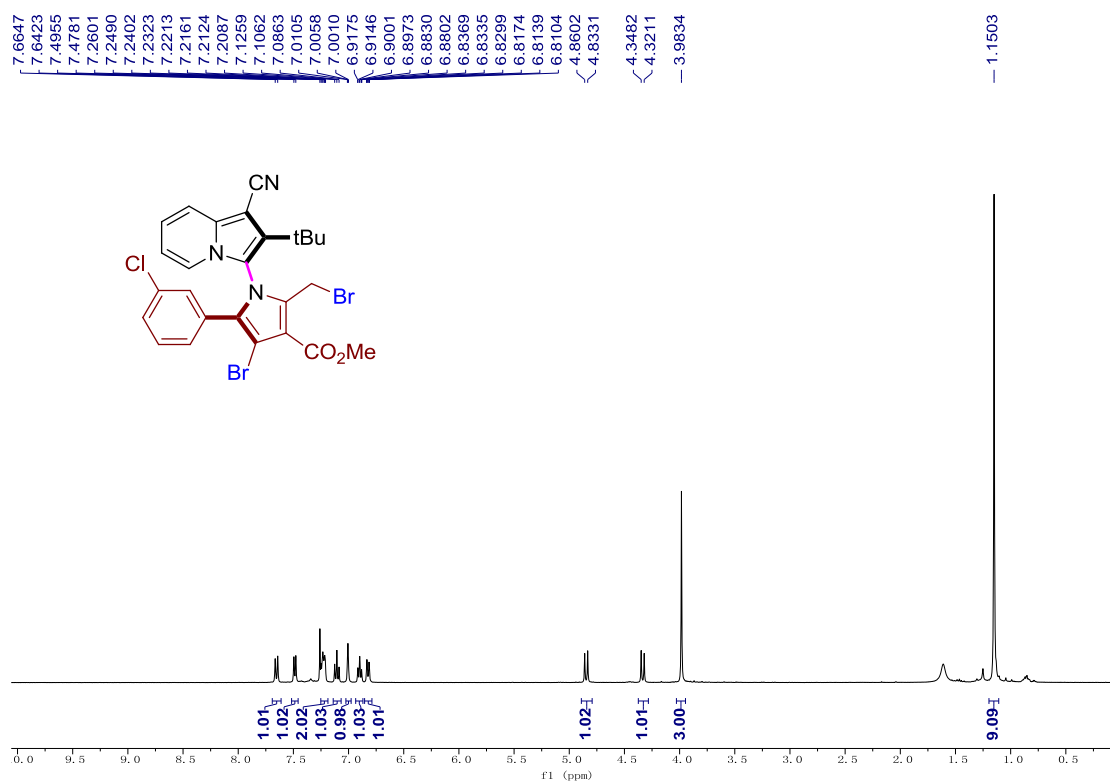

<sup>13</sup>C NMR of **5** (100 MHz, CDCl<sub>3</sub>)

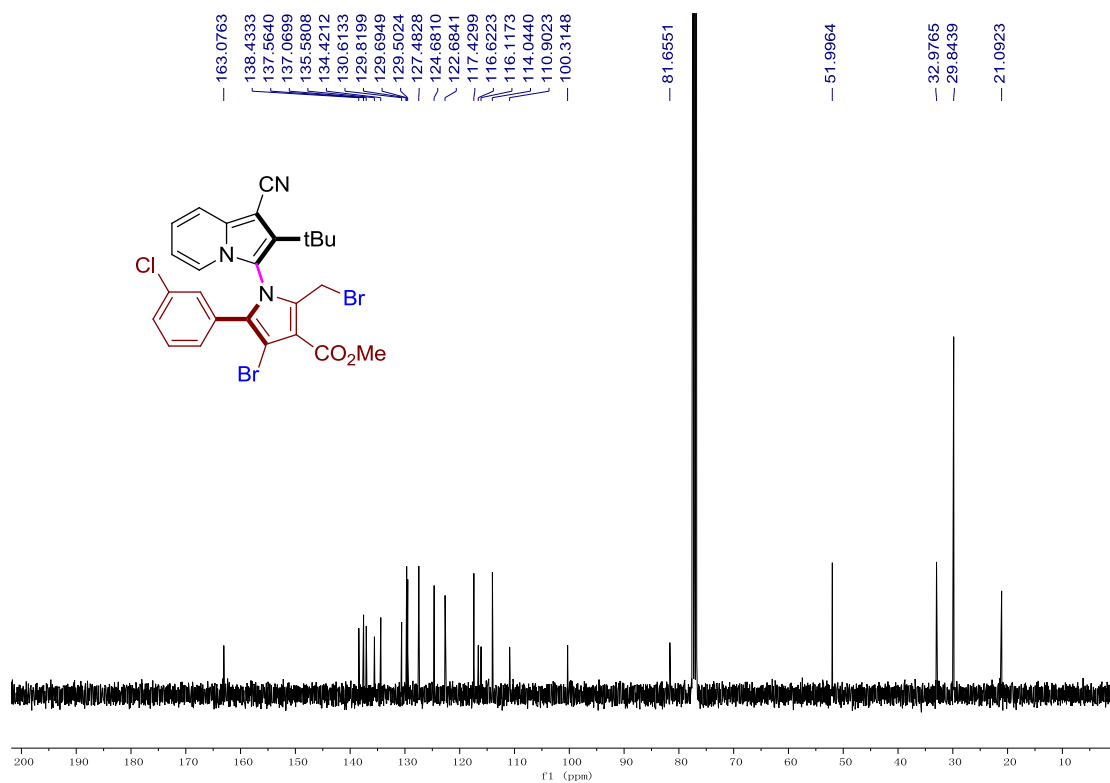



## HPLC analysis: rac-5

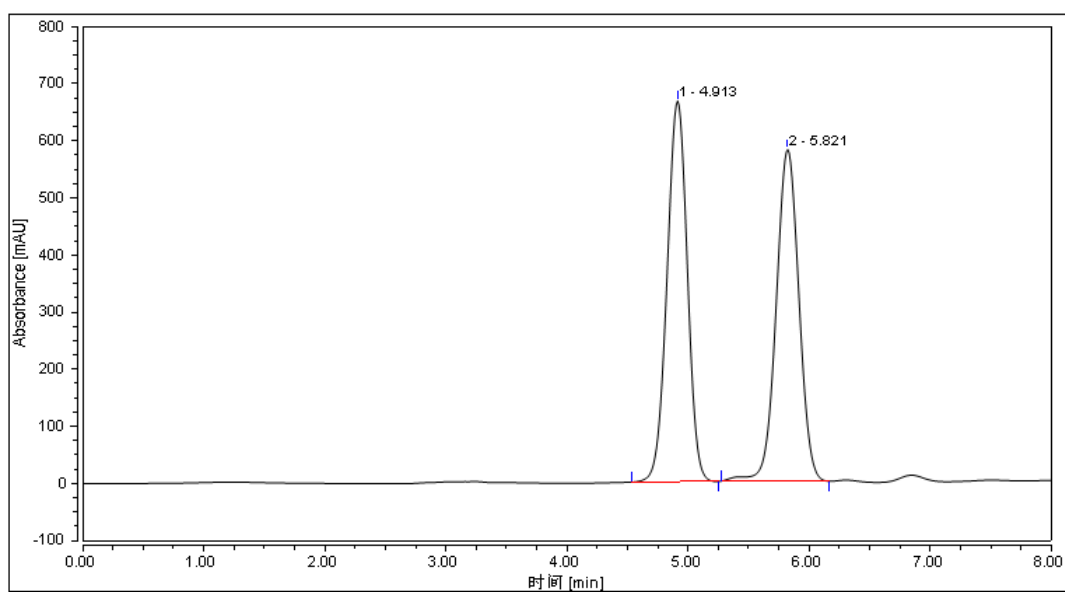

| Peak | RetTime<br>min | Area<br>mAU*min | Height<br>mAU | Area<br>% |
|------|----------------|-----------------|---------------|-----------|
| 1    | 4.913          | 129.222         | 666.902       | 50.52     |
| 2    | 5.821          | 126.549         | 580.923       | 49.48     |

## Enantioenriched 5

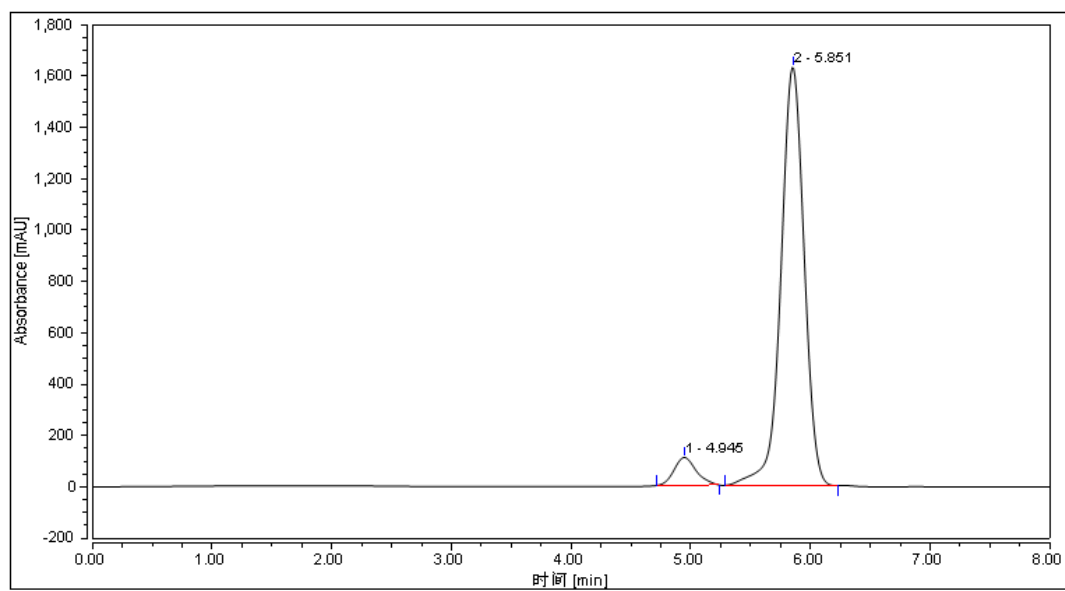

| Peak | RetTime<br>min | Area<br>mAU*min | Height<br>mAU | Area<br>% |
|------|----------------|-----------------|---------------|-----------|
| 1    | 4.945          | 23.285          | 108.486       | 5.97      |
| 2    | 5.851          | 366.762         | 1630.457      | 94.03     |

### 13. Reference

1. Hu, W.; Zhang, C.; Huang, J.; Guo, Y.; Fu, Z.; Huang, W., Access to Highly Functionalized Indanes from Arynes and  $\alpha,\gamma$ -Diketo Esters. *Org. Lett.* **2019**, *21*, 941-945.
2. Nam, S.; Kim, I., Cu-Catalyzed Ullmann-Type Double C–N Coupling Approach to 5-Aryl-5H-indolizino[3,2-b]indoles. *J. Org. Chem.* **2023**, *88*, 745-754.
